# Supplementary material for: ERK3/MAPK6 controls IL-8 production and chemotaxis
Source: eLife journal article supplement (doi:10.7554/elife.52511), 2020-04-21

Figure 4-figure supplement 5

A

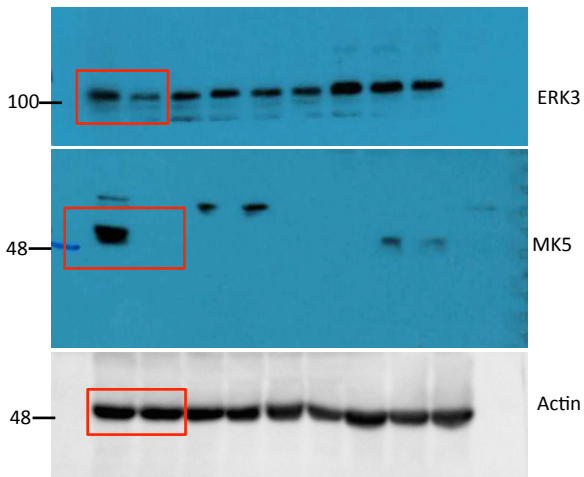

C

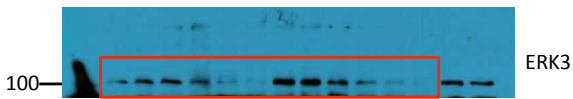

Supplement: supp [file elife-52511-supp-v1.zip]
