# Supplementary material for: ERK3/MAPK6 controls IL-8 production and chemotaxis
Source: eLife journal article supplement (doi:10.7554/elife.52511), 2020-04-21
Supplement: supp [file elife-52511-supp-v1.zip]

Archive with 36 entries (36 files):
- elife_poa_e52511_Figure_3_source_data_2.xlsx
- elife_poa_e52511_Figure_2_source_data_1.pdf
- elife_poa_e52511_Figure_3_source_data_3.xlsx
- elife_poa_e52511_Figure_7_source_data_1.pdf
- elife_poa_e52511_Figure_4_figure_supplement_5.jpg
- elife_poa_e52511_Figure_2_figure_supplement_2_source_data_1.pdf
- elife_poa_e52511_Figure_1_figure_supplement_1.jpg
- elife_poa_e52511_Figure_4_figure_supplement_1.jpg
- elife_poa_e52511_Figure_2_figure_supplement_1_source_data_1.pdf
- elife_poa_e52511_Figure_4_figure_supplement_3_source_data_1.pdf
- elife_poa_e52511_Figure_2_figure_supplement_2.jpg
- elife_poa_e52511_Figure_6_source_data_1.xlsx
- elife_poa_e52511_Figure_6_figure_supplement_2.jpg
- elife_poa_e52511_Figure_6_figure_supplement_1.jpg
- elife_poa_e52511_Figure_7_figure_supplement_1_source_data_1.pdf
- elife_poa_e52511_Figure_2_figure_supplement_1.jpg
- elife_poa_e52511_Figure_6_source_data_1.pdf
- elife_poa_e52511_Figure_3_source_data_1.xlsx
- elife_poa_e52511_Figure_4_figure_supplement_3.jpg
- elife_poa_e52511_Figure_4_figure_supplement_2.jpg
- elife_poa_e52511_Transparent_Reporting_File.docx
- elife_poa_e52511_Figure_3_figure_supplement_1.jpg
- elife_poa_e52511_Figure_6_figure_supplement_3_source_data_1.pdf
- elife_poa_e52511_Figure_3_source_data_4.pdf
- elife_poa_e52511_Figure_4_figure_supplement_4_source_data_1.pdf
- elife_poa_e52511_Figure_6_figure_supplement_3.jpg
- elife_poa_e52511_Figure_8_figure_supplement_1.jpg
- elife_poa_e52511_Figure_5_source_data_1.pdf
- elife_poa_e52511_Figure_4_figure_supplement_4.jpg
- elife_poa_e52511_Figure_5_figure_supplement_1.jpg
- elife_poa_e52511_Figure_4_figure_supplement_5_source_data_1.pdf
- elife_poa_e52511_Figure_4_figure_supplement_2_source_data_1.pdf
- elife_poa_e52511_Figure_7_figure_supplement_1.jpg
- elife_poa_e52511_Figure_2_figure_supplement_3.jpg
- elife_poa_e52511_Figure_1_source_data_1.pdf
- elife_poa_e52511_Figure_4_source_data_1.pdf
