# Supplementary material for: ERK3/MAPK6 controls IL-8 production and chemotaxis
Source: eLife journal article supplement (doi:10.7554/elife.52511), 2020-04-21
Supplement: supp [file elife-52511-supp-v1.zip › elife_poa_e52511_Figure_3_source_data_1.xlsx]

## Sheet: Venn diagram
t0	t24	t0.t24
CD274	FOSB	BIRC3
FAM129A	NR4A2	TNFAIP6
COL5A1	NR4A3	CXCL10
TAP1	IL11	IDO1
WFDC1	PKI55	GPR180
NAV3	STC1	GCH1
PML	F2RL3	CCL5
PDZD2	LINC00473	OLR1
LINC00475	CD24	TNFSF18
UHMK1	TBX2-AS1	GBP5
IRS2	SGK1	CXCL11
TJP1	PRDM1	SERPINB2
TNFAIP3	CH507-42P11.8	NT5C3A
FASN	CCR7	GBP1P1
LMO7	CTD-2047H16.2	RCAN1
DDAH2	SVILP1	CTSS
NAV2	BOLL	UNC93B1
PGPEP1	LINC00856	TRAF1
EPG5	SST	RND3
NPC1	KIAA1024	VSTM4
P3H2	TDP1	COL3A1
SLFN5	RP11-156K23.3	ANKRD1
ATP13A3	COL18A1	LGALS9
IRF7	FRMD6-AS1	GBP4
GNG11	PER1	GLIPR1
SLC6A9	NR4A1	ATP9A
EPHB2	DYNLL2	IL18BP
GUCD1	CCDC82	CRIM1
RELA	PVRL1	MESDC2
TAPBP	ANXA2P2	C1GALT1
PANX1	CLCN5	PTGS1
SERPINB6	ZNF606	WARS
BCL2L13	NOTCH3	GADD45A
HEBP1	SFT2D2	STARD4
PTPRA	LINC00839	NCOA7
GRIP2	SYNM	IL4I1
MYO10	RTKN2	SHISA3
CMPK2	THRB	CLDN11
STK4	LMLN	LAP3
TMTC1	MIR186	EHD4
GPR37	LLPH	DDAH1
PPP1R12B	PLCE1-AS1	UGCG
F2R	RP11-686D22.3	ICAM1
FAM193B	CLSPN	ARNTL2
N4BP1	RUSC1-AS1	EXOC3L4
NFASC	RP11-488L18.10	SSB
KIAA0226	SLC16A1-AS1	TNFSF10
DTX3L	RN7SL2	EDNRB
CKB	EID3	CREB3L1
RPL41	ARSE	MICAL2
NCEH1	MARK4	ISG20
NKX3-1	IP6K1	CD47
APBB3	CTD-3131K8.2	TNFSF13B
PCSK6	SGOL2	EZR
CTD-2228K2.7	ERCC2	TLR3
MT-ND3	LINC01091	CSF1
HLA-G	ZNF529	WISP1
RBCK1	LCA5	GANAB
XPO6	RNF39	CFH
ZC3H12A	GPHN	INSIG1
UHRF1BP1	RHOB	C3AR1
LGALS8	ZNF229	LIFR
CDKN2B	LYPD3	LGMN
ENTPD7	CTC-444N24.11	CD38
QKI	FAM227A	PIP5K1A
IL7R	PDRG1	NUDCD1
VCPIP1	SEPT3	ETS1
MT1E	PLEKHG4	THBS2
WWC1	LLNLR-246C6.1	CXCL8
AXL	HLA-DMA	TACR1
FBXL7	HMGXB3	RP11-166D19.1
LPAR1	HES1	COL5A3
CSDE1	NTN5	MLKL
HIF1A	PTBP2	OAS2
ELF1	CD99L2	GBP1
FAM102B	GCNT2	FAM84A
TNS3	XPA	AKR1C1
PSMA3	ZNF600	SMURF2
SERPINB8	SMARCD1	RET
TXNRD1	RAB3A	TMEM35
FGFR1	IL18R1	BATF2
MOB1A	ESF1	CNP
S100A6	TRIM56	TMEM62
TFAP4	SMYD4	SLC5A3
CPED1	FAM131A	CASP3
ANXA2	LRP12	MLXIP
FOXN3	CTC1	MX2
UVRAG	IL15	CLDN1
SLC51B	SLC9B2	SC5D
MAX	RAD9A	IFIT3
RRM2B	PTPN2	FST
LAMA5		GMPR
ANTXR2		NFE2L3
NDUFS2		TNS2
XRN1		MAT2B
PNPLA6		GFRA1
OSMR		SLC16A1
TKT		OTUD4
COLEC10		BLZF1
C15orf48		IRF1
ETFB		JUP
SMIM3		SLFN12
ZC3H12C		HMGCS1
ACADVL		RGCC
MDK		NRG1
PPT2		IL1R1
RHOBTB3		IKZF2
SHROOM1		SCARB2
XKR8		HSH2D
PARP4		MANBA
CALM2		RIPK2
HELZ2		CHST14
UROD		IFIH1
TNIP1		DDX58
FSCN1		SDC1
ZNFX1		EFCC1
PSMA5		WDFY1
FBLN5		PNPT1
TRIM65		CXCL16
ZBTB40		GABBR2
KITLG		HHEX
MMD		MSMO1
ANGPTL4		VCAM1
TMED9		PHACTR4
TGM2		CACNB3
DDX52		MAPK6
SOX4		KANK2
PSMF1		EDNRA
HAS3		SLC23A2
GTPBP1		USP25
TMEM173		ABCG2
THY1		CACNA1I
ARHGAP17		LDLR
MPHOSPH6		PI4K2B
CLIC4		GBP3
ADRB2		RRAS2
SLC2A12		GAS6
RBMS2		TMX1
ALCAM		STARD5
HMGN2		SLC2A6
SH2B1		SCUBE1
ULK1		OSTM1
PPP1R14B		CNDP2
PARP14		DOPEY1
ARL4D		SCD
IGF2		PDZRN3
PATL1		GNPDA1
KIAA1217		ETV7
ADI1		IFIT2
OAS3		PARP12
ARID3A		CTGF
NPTN		NT5E
TPGS2		DAB2
DRAM1		UAP1
R3HCC1		IDI1
CSDC2		HGF
ARID5B		MYD88
IKBIP		SPPL2A
COQ10B		RGS2
MFGE8		TAP2
DCAF12		TMEM119
PAPPA		IFI35
HSPA2		SLC12A7
KIAA1033		GLRX
RAB11FIP1		CD69
TMEM106A		COL1A2
ACTN4		BIRC2
AIDA		IFT27
CORO1C		SLC25A30
ATP1B3		RP11-638I2.9
SEMA5A		SLC25A28
USP18		ADAM19
PARP9		SERPINH1
ABL2		IL6R
TRIM25		DKK1
ANKIB1		RNF114
GREM2		TPM4
ANKRD13B		C3orf38
SUV420H2		MKNK2
HLA-E		DSP
DLG5		ZDHHC18
NAMPT		LGALS17A
ZFYVE26		TDRD7
AKR7A2		SDC2
ZNF710		TYMP
PPP2R2A		VAT1
FSTL1		PTX3
PGAM1		PLOD2
ALDH3B1		TACC2
USP28		TNFRSF21
APBB2		ATP2B1
CYLD		GABRE
TRAPPC1		MB21D1
APBA1		TMEM50A
STARD8		PLIN2
STS		HMGCR
ALPK2		NUB1
KPNB1		MRVI1
TAB2		LUM
GPNMB		SERPING1
VPS4B		DHCR7
CLMP		IFIT1
HERC6		ZBP1
CCNL1		FGF1
CAV1		NEK7
RNF19A		TNFAIP2
SCAMP1		CAV2
SH3D19		OLFML2A
MAML2		IL32
MCM4		PITPNM2
EFR3A		PAG1
ULK3		LRRTM2
PSD3		CDC73
ADAM10		DHX58
PLA2G4C		ARL5B
TMEM194A		STAT1
B2M		DHCR24
GK5		FAM65B
CD55		SETDB2
SEC13		BRIX1
HDGFRP2		B3GALNT1
NCOA3		PARP8
DHX15		AKR1C2
TM4SF1		PODN
ARL6IP5		RASGRP3
APP		FEM1C
TTC3		PLSCR1
NQO1		LAMB1
ECH1		NDRG4
PRKD2		BRIP1
WASH2P		AKAP6
PCNXL4		BDKRB1
SLC25A3		MYBL1
HS2ST1		FBXO6
EPT1		CREB3L2
PCNXL3		USP15
P3H1		ERLIN2
GIGYF1		FILIP1L
TET2		LIMA1
DUSP16		NMI
METRN		SNX30
AGAP3		SETD7
NCOA2		SLC1A2
FOXK1		ITGB2
TMEM178B		RGS3
ZDHHC7		ITGA2
ANKFY1		FYTTD1
SCN1B		APOBEC3G
MED25		DIAPH3
HMG20B		MX1
CTTNBP2NL		C1S
DAP		CEACAM1
TNS1		CFLAR
NBL1		VCAN
TCEA2		CCRN4L
C1orf198		MAGED1
FRMD3		DENND2A
EIF2S1		RNF19B
FERMT2		NEDD9
ERAP1		SREBF2
NFKB1		HAPLN3
RP11-638I2.10		SNAI2
GSTK1		SQLE
MAN2B2		JAK2
MYL12B		GPR56
ELMO2		LMO4
LOXL3		OPTN
WWC2		SLC38A2
ADCY6		PDCD1LG2
DUSP8		DAZAP2
P3H3		MAB21L2
SAMD12		MYL12A
ACAP3		EHD3
IL15RA		GREM1
SDCBP		CCL20
BTN2A1		PDLIM1
FAM98A		EXOC6
C9orf69		TRAM1
UBE2J1		CYB5A
NRP2		APOL3
PLXND1		ITM2B
AMOTL1		GBP2
PTGES		FAS
FRS2		SLC6A6
TNKS2		ARF6
PTGIR		SUB1
SLC8A1		CA11
SNX27		CDS2
SLC44A2		HIC1
BEST3		CPT1A
DOCK10		CHST3
DCTN4		RNF138
TNFRSF1B		SVIL
HLA-B		IGFBP4
RNF167		ZNF616
PRICKLE1		ADRA1B
KDELR1		BICD2
GRASP		MYOCD
HIATL1		CAMK2N1
HEG1		RAB8B
LRIG3		TCF7L1
DDR1		BACE1
POMP		SALL1
SLFN11		ENY2
DKK3		KLHDC3
TCF7L2		SLFN12L
CYP4V2		STAT6
APOL2		PSMA4
STARD7		OAS1
YEATS2		ATP10A
DICER1		MARCKSL1
RASL11A		AGPAT3
PSMD12		LBH
CRELD2		C4orf3
ADAMTS6		SLC1A5
CD109		UCN2
PEX11B		TPM1
IL6ST		PSMB9
DNAJB6		TMEM171
DOCK9		FADS2
TRIM46		RIN2
SLC7A2		TMEM60
TMEM176A		SPG20
GJA1		SYT11
RAD23A		CBR1
NOTCH2		MRPL32
FLT1		TP53I11
RRNAD1		PRRT1
CAB39		HRASLS2
CASP4		PDGFRL
APBB1		DYNLT1
CASZ1		FAM213A
KIAA1377		C16orf45
MAPK12		PDE8A
SEC23B		TANC2
FAM53B		GTF2B
PARD3		NEURL1B
VEGFB		SOD2
BMPER		APCDD1L-AS1
RNF213		QSOX1
TPMT		PBX1
FGD1		PIK3R3
SLCO3A1		CD74
HEMK1		SPTBN5
ZKSCAN1		RASSF2
ADD3		LDB1
UBE2E1		PARP10
PRRC1		SAMD9L
TP53I3		NFATC4
UBXN7		ARRB1
BNC1		LIMK1
EEF2K		ACTG1
ATP5L		PLSCR4
SMARCA5		SSTR2
TICAM1		NXN
LRRFIP2		CFB
WTAP		RNF149
NPTN-IT1		HNMT
PSMB2		ISG15
SMPDL3A		CCDC109B
PIEZO2		HSD17B2
MORC3		EHD1
SSR2		BACH1
MANF		RNF144B
RAB3GAP1		TXNDC12
C11orf49		CDK14
ADAMTS14		KRT34
ZNF76		LPIN1
UNC119B		SLFN13
FOXP1		SCLT1
GTF3C1		KRTAP1-5
HCFC1R1		CDR2L
NUAK2		IL6
TINF2		NUDCD3
RBM47		UNC5B
PPDPF		C7
MEFV		SAMD9
NADK2		DYNC1I2
SSBP3		ARMCX2
METAP1		VWA5A
FZD7		TRIM22
TGOLN2		ITGA8
PRKACB		ACTN2
CERK		MASTL
KARS		PPM1K
PI4K2A		MOV10
SLC39A8		IRF2
FBXW11		PSMA2
MT-CO3		ATP6V1B2
RFX5		PBXIP1
AP1G1		CCL2
BCL6		PPM1B
SBNO2		PON2
YWHAZ		NAPA
TP53BP2		C21orf91
EIF2S2		GLT8D1
EGLN1		FOXP4
ECT2		ODF2L
BNIP3L		LTBP1
CTD-3064M3.3		L3HYPDH
ZER1		TNF
TOR1B		SAMHD1
PNRC2		PKD1L1
ZFP36L1		PSME2
CALCOCO2		GPR125
MIER1		UXS1
H2AFY		TMPO
MAPRE3		SLC18B1
KIAA1522		KBTBD2
SNHG3		INSC
PSMB8		PLEKHA4
REEP2		FOXL1
CD44		MGAT5
ACSL3		MICB
ENO3		DDX60L
WSB2		UAP1L1
ZFPM2		WFS1
TMEM45A		TRIM38
C7orf49		OLFML3
TAOK2		GLP2R
CPT1C		PDHX
C9orf78		FAIM2
IFNAR2		F2RL1
GLMP		BTG3
PPIF		TSPAN12
NPM3		CAMK4
ARL8B		SOX12
LACC1		TRAFD1
C3orf18		IFI27
NAV1		MTSS1L
USP47		CASP1
MYO18A		HTRA3
MXD1		TMEM97
ZNF318		DTX4
MAF1		FDPS
ATP6AP2		ELN
ZNF512B		PGM2L1
RAP1B		LIPA
LINC00205		CNPY4
MGAT4B		SHISA5
WDR44		MKRN1
PIEZO1		ARID5A
FAM120C		TMEM229B
ANKRD13A		LACTB
RPS18		NBN
SUCO		PEG10
ZEB2		ZCCHC3
DENND4A		IFNB1
LINC01089		MOXD1
KAT6B		CCDC71L
SEC63		RIPK1
SLC37A1		PPT1
CELSR1		G3BP2
SLC43A2		LAYN
MAP3K5		ME2
UBE2E3		SLC2A1
HIC2		GNB4
GLRX5		CDH6
MED13		SH3BP4
FAM26E		D4S234E
KIAA0368		IFI16
BET1L		PRPF8
GVINP1		C1R
MAVS		C14orf132
TIMM17A		CD248
GABARAPL1		ZBTB4
FMNL1		C1QTNF6
TANC1		BTBD3
TMEM258		ADAM9
UBE2Z		TJP2
ABCC5		SPSB1
MDC1		GPBP1
VGLL3		EIF5A2
PABPN1		C9orf91
HIRA		ANLN
NSMCE1		RGS20
LAMTOR4		IRG1
TRIM14		GPCPD1
KIAA0195		TBL1XR1
NOV		SNPH
ORAI2		RBMXL1
LAMC1		ZNF629
CDIPT		ELOVL2
ADAMTS5		DNAJB4
HLA-A		EEPD1
ARPC2		KCTD9
SECTM1		C12orf75
MEIS1		ENOSF1
NABP2		LINC00883
RPN2		TMSB4X
SCAP		CYGB
TRIB1		LSS
ZNF655		FMR1
KLHL29		TANGO6
ARHGAP5		EPSTI1
UBB		EXTL3
TMEM140		UBA6
HIPK2		ACSL5
CAT		GSDMD
ATP5G2		CASP10
POFUT1		CC2D2A
MYL9		ACTR3
BCL9L		GLS
IVNS1ABP		UCK2
ETV4		LRRC8D
MYH10		MB21D2
PCDH18		SNX29
CAPRIN2		LBR
SPOP		DSE
FAM20C		NUMBL
CHSY1		VASH1
MYO19		ARPC5
PTMS		B3GALT2
RCOR1		FBLIM1
CAPZA1		FDFT1
ZC3H7B		PITPNB
SREBF1		GDNF
FUT11		ACSS2
GPC1		KIF16B
HSDL2		TMEM64
APLP2		TSPAN33
DLG4		ZDHHC16
LRRC75A-AS1		FRMD6
SEPT11		PTGES3P1
NSMF		SNX6
CCDC50		HOXC8
FN1		APH1B
NLRX1		RP11-79H23.3
FBLN1		EXOSC9
C17orf67		DEK
CPEB2		IMPDH2
LEPROT		ATP2B4
BZW1		TMEM87B
KCNF1		DBN1
PDGFRA		PTPRN
CAND1		DRP2
HERC4		ICMT
SETX		DCP1A
KLHDC8B		PDXDC1
SMIM13		AOX1
TLN2		TYSND1
SPARC		SPATS2L
PTDSS1		PAMR1
PCMTD2		CRTAP
IFNGR2		P3H4
TEAD3		IFIT5
SRSF2		MOB3C
MKL1		FAM53A
SYNGR3		PXDC1
FAM21A		MCC
KHNYN		ZNF664
GSAP		CDC42EP3
NLRC5		ZNF804A
NSDHL		BMP4
NELFB		LOXL1
BNIP3		GRAMD4
TM9SF2		STAP2
PHYH		CELSR3
DDX21		SH3BGRL
NINJ1		NFKBIE
PDIA6		TAPT1
FZD5		TSC22D2
CCNYL1		UNC45A
UBC		PPARA
PHAX		TGFB1
CXXC5		ABCF1
POLA2		SNED1
AKR1B1		TMEM123
MUC1		RTN3
ASAP2		PHF12
CAPZA2		IFITM2
MED15		GAS7
GPRC5A		GRAMD3
DENND5A		ARHGAP6
TUSC2		NDFIP2
ARHGAP12		PAQR7
KPNA4		SLC26A2
CTSL		THSD1
ATXN7L1		TARS
HOOK3		TBC1D1
EREG		GOLM1
PITX1		RBMS3
SRD5A1		DENND5B
TRIM21		NID2
GCNT1		SEPT4
WDR54		CTD-2562J17.6
CCDC80		SIX1
HAGHL		PLA2G4A
HLA-C		ETNK1
CRYAB		RP2
EGFL8		ADAMTS8
ZMYM4		ABHD2
PHACTR2		MAP3K12
FAM3A		TUBB6
GABPB1-AS1		ANGPT1
SHC4		CDC42EP1
PLEKHF1		COL4A1
NEGR1		C2orf27A
SLC10A3		DSEL
LONP2		FLRT2
SLC20A2		CTNNAL1
CDK16		STOML1
HADH		NOLC1
ZNF688		IGDCC4
RP5-857K21.6		SIK2
ACO1		MTMR1
TTLL7		IFI44L
SYNGAP1		MINK1
CCDC57		MDM2
SUGP2		STOX2
MMS19		LTA4H
RBL2		SLC26A6
MBOAT1		TNKS1BP1
C9orf172		CEND1
WDR6		IKBKE
PCTP		GCNT4
TOMM22		WNT5A
NPRL3		FUBP1
TRIM5		MPP1
AKT2		TMEM150A
TP53I13		RNF152
PRRT3		GPRIN1
KIFC2		SLC39A7
TEAD2		ACAT2
CUX1		LGALS3BP
OST4		RBM3
TAF12		DDI2
TMEM120B		CHRNA1
C1orf52		IL20RB
PITPNM1		NID1
NR2F6		LIN7C
GGA1		FLI1
EML3		C11orf95
CARD16		PLA2G16
AJUBA		CSGALNACT1
CNTROB		ADPRHL2
SEPW1		TRIOBP
KRTAP2-3		JAZF1
IFI6		FHOD1
SIRT2		IFFO2
C1orf233		EMILIN1
STOM		EFR3B
PCDH17		DNM1
MEA1		PGF
DECR1		EIF4EBP2
MAN1A1		CTNNBL1
ATF5		SIKE1
CCM2		CLU
SAMD4A		ASPHD2
CARD6		MVD
HAT1		RP11-1100L3.8
PRPF4B		SERINC5
OSBPL5		PAFAH1B2
PRKAB2		LRRC32
ERRFI1		CD14
ANO2		FAM102A
ANGPTL2		TCOF1
BCORL1		HABP4
FENDRR		SSH3
DPYSL3		ADAT2
KIRREL		MAP3K14
SLC35A4		PTN
PPAP2B		C7orf69
COL16A1		CCBE1
HNRNPK		SLC38A7
GSTZ1		ANGPTL1
BAHCC1		MUM1
PARP11		SLITRK5
KLHDC10		CALD1
MAP3K7		MARVELD1
PLAGL1		MT-ND1
GADD45B		CAB39L
LIX1L		C1QL1
RNF217		GOLGA2
C4B		TGM1
TBXAS1		MTF2
PPOX		CDH13
HPSE		APOBEC3B
UBE2D3		TMEM165
ZNF3		HDAC5
ARHGAP1		BST1
P4HTM		PODXL
STK36		CUL2
SOGA1		MAP4K3
PEA15		RPS6KA6
FGFR4		L2HGDH
MCOLN2		COMT
SEPT9		SERPINB9
RILPL2		PGAP1
ARMCX6		CYP2S1
KLF6		ST3GAL1
RALB		PHF20
ALDH16A1		CXorf38
APOL6		ITGAV
NRD1		ADAMTS12
CREBL2		LIN52
ADAM17		CDR2
ARRDC3		ABHD17C
MEN1		APOL1
ADAR		UBE2V2
PRPF3		PCGF5
RTP4		NTM
HDHD2		USP6NL
RDH10		ACTG2
S100A4		HYOU1
TBCK		LOXL2
SLC35F2		SMIM14
USP22		GLO1
COL4A5		TCN2
AHNAK2		LPAR6
TMEM38B		DDHD1
FKBP7		PLD2
TRIM28		CLUHP3
DENND3		SNIP1
TFRC		SLC12A8
ANP32E		FGF5
HIPK3		NDUFA9
NDST1		GLIS1
DBF4B		CBX6
NRIP1		ABHD5
TBC1D23		NECAP1
BAHD1		TFAM
AIFM2		UFM1
RPS6		MAP4K4
KCNK6		CNNM1
RASL12		SLC25A29
OSTC		PLCB3
C3		MT-ND6
BST2		FAM168A
ATP2A2		ATP6V1A
IFI27L2		FBXO21
PLA1A		DIXDC1
CDK18		ZNF652
PPIB		PRMT6
FAM177A1		CHN1
NXT2		SP100
HOMER3		COLEC12
NFS1		CAD
MEGF8		TEX2
ATP6V1D		AZI2
KPTN		ANO7P1
KRT10		SRPX
CD164		B3GALNT2
PIGX		C11orf84
XPR1		CXCL6
DLL1		DDX24
LINC00847		EDEM3
MXRA8		NES
STT3B		AHDC1
FAM127B		TGFBR3
GPR135		SERPINB1
FLYWCH1		CUL4B
LAMP2		RNF122
EXOC3L1		AC058791.1
DLD		STK35
RP11-415J8.3		SCML1
ATP6V1F		MMGT1
COL5A2		POU2F2
TBK1		MAP1A
NISCH		FKBP4
MRFAP1		SMOC1
DMXL2		ABCA7
PYGO1		C10orf54
BLVRA		PHTF1
HSD11B1L		ARMC9
ASAP1		TCF3
CAMK2G		C6orf62
TSC1		NOC3L
BLOC1S3		SMYD2
TMCO4		ATG7
SLC39A14		KLK10
MUC16		ELOVL4
MTA1		C5orf56
KBTBD8		C6orf89
AKNA		CAMK2D
LY6E		OBFC1
ACTB		BTRC
PLEKHG4B		MTUS1
SPTSSA		THEMIS2
CTD-2033D15.2		MMP2
NIPAL3		HLA-H
MXD4		IMPA1
KLHL5		FAM49A
SLC20A1		PLCD3
RPS29		CAPN5
TPCN1		TOR1AIP1
DGKA		STAT5B
THRA		ZC3HAV1
MMAA		TMEM52B
TRIM58		TYRO3
TFB1M		FURIN
RP13-143G15.4		TMEM26
MAZ		TAC3
UGP2		BTG2
TPM3		SRGN
OGFR		RANGAP1
RAB3IL1		CYP2J2
HEPH		USP53
IDH2		TANK
CTA-384D8.36		KIAA1644
POLR3C		TMX4
PSEN1		HDLBP
TNPO3		PHTF2
REEP3		KDELC1
STX18		CTC-231O11.1
DENND2D		DCAF7
TIPARP		EIF3J
NNT		NNMT
NUMA1		C19orf66
EEF1A2		ITGB2-AS1
PLEKHM2		SIRT5
DDB2		FBXO33
B3GNT9		ORC4
KCMF1		CORO2B
AC006548.28		HRH1
CES2		MT-CO2
SYPL1		GOLGA3
AC007879.7		RP11-686D22.7
ZBTB25		CDC42SE2
CXCL5		ECHDC1
MAST2		KIF1C
TSPYL4		BCAP29
RP4-756G23.5		GDI1
ZNF142		CHD3
PPP1R3G		PAPD5
CTD-3035D6.1		PLAT
C2CD5		SOX13
CHIC2		ZFP90
KIAA2018		ACOT7
ITGAE		SFMBT1
FBXO5		AC116366.6
ENTPD5		SFXN3
TMEM189		KLHL24
APOE		IL12A
NFE2L2		RAB29
PHF23		SETD1A
MOB4		PDE7B
CLEC2B		ITGB5
MST1R		PERP
FAM111B		IL1RAP
AGPAT1		PFKFB3
ACTN1		DAAM2
SSR3		DHX36
CYHR1		TMEM176B
SH3GLB1		GNB3
MITF		HIST4H4
FNBP1		IFI44
MAP7D1		NPEPPS
PAFAH2		ZNF436
MELK		CLIP3
PHYHD1		RP11-834C11.4
FIBP		MT-ND5
SLC17A5		SNTB1
SSC5D		DNAJB5
BTN2A2		RASA3
SRPX2		KDM2B
PLEK2		ADCY3
PRR12		BAI2
ROBO1		CSNK1E
STX1A		RP5-907C10.3
ASNS		SLC15A3
USP14		FAM109A
PLXNB1		LRIG1
PLEKHO1		NGF
OGFRL1		SLC25A32
GPRC5B		PPA1
NPAT		IKBKAP
USP16		ENTPD1
LYPLA1		CNNM2
CLDN23		SLC46A3
FBXO39		ZNF623
LHFP		ARHGAP27
PLXNB3		GIMAP2
IKZF4		LPCAT1
PCGF2		RBM22
SLC2A11		MMP15
RP11-449P15.2		TRIM45
AK5		VAMP5
MR1		PLEKHG2
ADARB1		HAP1
IFT57		SKA2
HS3ST3B1		GCA
AP1M1		AMPD2
UBAP1L		PRICKLE2
FAP		CD2AP
COX6C		MED10
ETV1		PSMB10
DSTYK		UBA7
HEBP2		GPR161
ZNF862		IL7
OS9		AC104654.2
DCAF4		STAMBPL1
RB1		VPS54
AC016747.3		SSTR1
PRKCI		B3GNT2
LNPEP		SPTA1
COX7A1		DNAJC7
TSPO		ORC6
USP33		NABP1
MRRF		AKAP7
RPLP2		MEF2D
RCAN2		TECPR2
TMEM116		CUL7
PIP4K2B		SCP2
TRABD2A		SBF2-AS1
CMTM3		LHFPL2
ACSF2		ASL
C5orf22		PIANP
CAST		BTC
HLA-F		BFSP1
CHST7		NIFK
ISG20L2		PSTPIP2
CD276		PHF1
KCTD12		RAB39B
NFIC		TMEM159
MLLT11		AC093724.2
TRIO		TACC1
ARHGAP35		SDPR
ERGIC3		HSPH1
ITSN1		TNC
ZBTB33		CXCL9
UBTF		TIFA
IPO8		ANKRD50
LETM1		KAZALD1
NPY		HPS4
TTLL12		SALL2
COL13A1		ABLIM3
STARD13		TBX2
WDR11		GRN
H1F0		APOBEC3F
FAM189B		HERC5
TARS2		CCDC85C
SMG7		HIPK1
TBX18		GLDN
MEX3D		GATA6
C16orf58		PHF13
RP4-742C19.13		ELOVL6
MANEA		PXDN
MRPL52		COL4A6
SGCB		C8orf46
SS18L1		JKAMP
RPAP1		COL7A1
SEC22B		DPY19L4
RPS6KB1		PPP1R3C
PRDM16		AQP3
TMEM47		ZSCAN29
BASP1		PRKAR2A
WDR25		RP11-174G6.5
INO80E		ARID4B
HDAC1		NUP62
RP11-1094M14.5		C11orf24
FAM111A		POU6F1
LMCD1		HMSD
STK3		SOCS7
PTPLAD2		PFKM
ARL6IP1		GAB2
ZNF267		AKAP12
KIAA1524		P4HA3
VPS26A		BCL7A
ATP5I		PHF10
ZNF48		SASH1
ZNF510		GRB10
PLEKHM1P		ZMYND15
WDR75		DUSP4
MAPK8IP3		FHL3
UBL4A		PHGDH
WDR12		SIRPA
PRCD		TCF21
LPCAT3		HEXIM1
CPNE2		MIR222HG
C18orf8		NCF2
GOLGA2P5		TSHZ1
EGFR		TLDC2
MYO1E		FOXRED2
PRKAR2B		BX322557.10
SNAP23		PPP1R9B
ARMCX1		PRKAA2
DIP2A		LRFN4
YIPF2		DCN
ST5		SLCO5A1
SH3GL1		LYSMD2
C6orf132		ASB13
TUFT1		ZBED4
XPNPEP1		CISD1
CBX7		GLE1
UNG		SSX2IP
SLC9A3		CTD-2521M24.5
ITGA11		CLIP2
CTSC		CBLB
OPN3		UNC13B
AFAP1L1		RAB32
RARG		RPS6KA2
SMIM4		RGS9
SMARCD2		ACBD5
SRGAP1		HEXDC
DEF8		PHLDB1
ACVR1B		MSL1
CFAP36		TTC38
RSAD1		SP110
CAPZB		CSF3
PPP1R10		ZNF277
USF2		TMEM214
MBOAT2		CA13
AP001610.5		MT-RNR2
GM2A		CDKN2D
DBNL		ALDH18A1
ZBTB46		MCOLN1
CORO6		KIF5B
TWISTNB		BAZ1A
FBXO17		ACACB
ROMO1		TMBIM4
UBXN2A		MMP14
FAU		GPR65
RPL38		COLGALT1
HSP90AA1		ZADH2
TMEM255B		CDC14B
PLEKHH2		PTGDR2
RP11-517I3.2		PCSK9
XPO7		MFSD2A
AAAS		RGP1
ADPRM		ESYT1
CMIP		CKAP2
OCEL1		UBE2O
RP11-766F14.2		RPAP3
INTS3		JMY
LPCAT4		HKR1
CTD-2369P2.8		MLEC
ERBB2IP		PLCE1
KMT2D		AC004988.1
RNF130		RMI1
NAA15		TOMM20P2
LIMS2		SEC62
CBL		KAT2B
WBP11		ZW10
ZC3H15		AK3
CDAN1		TTYH3
CD2BP2		LMO2
XAF1		GPR107
HDAC9		TK1
TMEM198B		PBX2
NDRG1		TMED7
SPCS1		MT-CO1
SLC27A4		SULF1
DICER1-AS1		SLC8A2
MRPS26		KIAA0040
RNF44		SLC25A15
ADSS		PIK3C2B
FOXF1		C3orf52
FAM63A		MT-ND2
MTRR		F11R
SHC3		DNM3OS
PRX		CNTN4
KCNJ2-AS1		SDCBP2-AS1
CTB-119C2.1		ZNF792
STARD3NL		OPLAH
SNHG19		RBM7
JMJD1C		KIAA0020
LATS2		C22orf46
ATPIF1		ZNF227
GNG5		FAM160B1
CSAD		SEPT10
MFSD3		ZNF398
FNDC3B		VEGFA
ZNF462		AC011997.1
TRAPPC2L		ELOVL3
NBPF3		UPP1
GPR153		PAQR5
TOMM20		PFKFB4
HCAR2		PRMT9
ANKZF1		PRAF2
FAM195A		ATG12
RAB11FIP3		RNF41
RUNX1		SRPR
HTRA1		TUBA4A
SGMS2		FBXL20
ZNF133		RBBP6
FAM127A		CTD-3252C9.4
EIF3M		SAA1
CBX5		NME7
ATP5S		RELB
KDSR		ERAP2
HERC2		PC
RP11-244O19.1		SCO2
TRIM37		TSPYL2
SLC7A14		USP30-AS1
SFT2D1		MAP3K4
PTPRN2		SLC6A8
VEZT		WHAMM
HSCB		KIF3C
LINC00667		TMEM219
AC009950.2		CLIP4
UGGT2		ATL1
UBQLN4		DGKI
AUTS2		GLCCI1
METAP2		PSKH1
RAD52		DTNA
NDUFA3		ATG16L2
AHRR		KIFAP3
LINC00339		FAM212B
NGLY1		NTF3
ARHGAP21		PRIM2
ATN1		EBI3
RHBDF2		ANXA3
MAPK7		RP11-1094M14.8
MALAT1		EHF
NUCB1		CLCF1
RNF11		NFYA
WASF1		SPIRE1
SWI5		CACNG8
ACTA2-AS1		RXRA
CLCN6		SNHG18
MED14		CLN8
HSPA5		MT-TF
KDELR3		HECTD3
SNRPD2		HS1BP3
BRD3		SLC25A20
SNN		MGAT3
CEP164		RP11-686D22.4
FOXO3		ZNF667
ELOVL5		ATP1B1
ATG3		NAGK
ERGIC1		MT-RNR1
SYAP1		PRKACA
CDK8		WIPI1
IL12RB1		TRO
MRPL17		EMC2
NOL4L		RP11-757G1.6
MGST3		ARHGEF25
ANKRD16		SEMA6D
RAI14		MEOX1
USP9X		DNAJC15
OBSCN		PLCD4
EFTUD1		MCAM
ARHGAP20		RP11-366L20.2
SLC43A3		LDOC1L
LASP1		LINC00511
HIP1		TIA1
CRAT		GDF7
PRPF40A		RP11-21L23.2
VMP1		SAP30L
ZNF74		TMOD1
FKBP14		RAD51AP1
OASL		MT-ATP6
SNX7		CEP57L1
RP11-134L10.1		AC009133.12
NUDT4		ZNF211
FAM32A		MMAB
AP2B1		RAD1
IFI27L1		INA
YY1		IFNL1
IGF2BP2		RNF115
MORN4		SNRK
POLE4		ARMCX4
VPS37A		VAT1L
SLC35B2		ISCA1
PDP1		CCDC88A
ZNF281		TMEM54
UBR5		PAN2
KLHL36		FOS
ZFYVE21		RELL1
NEU1		NPHP4
SSFA2		EZH2
CRTC1		SRRM1
CYFIP1		CYP51A1
TMBIM6		GDF5
PANK2		RP11-686D22.8
TRADD		CD99P1
PLEKHN1		CA8
CSK		C2
ZNF436-AS1		PRPS2
DUSP6		SMOX
RAB15		MEGF9
TRAPPC12		GAS6-AS2
MIAT		PPP1R12A
FTO		GCLM
IPO13		NRBF2
CHP1		BAIAP2-AS1
PNPLA7		PITPNC1
PTPN12		WSB1
GSK3B		GPR84
PTRF		ZNF207
PTMA		CEMIP
NLRP10		SLC16A14
GPSM1		PVRL3
SLC37A3		CMAHP
AMDHD2		MEX3A
RPL8		GREB1L
RBM15B		PMP22
BRPF1		RP1-309I22.2
PTPRQ		U2SURP
POMGNT1		ITGA10
GALM		TMEM164
RABL6		PSAT1
HYAL2		IL34
PLXNA3		MDFIC
STAT3		TNFRSF14
KPNA2		TMEM246
AC008982.2		RETSAT
OR52K3P		CFLAR-AS1
URGCP		THAP9-AS1
SRSF6		CABLES1
PHF5A		SCARA5
NENF		PRRG3
BRCA2		ABCA3
CSNK1G1		AC091878.1
PPP4R1		DACT1
RPL11		SLC24A3
PPP6C		RPS6KA5
GAB1		MSX1
PIAS1		PTPRE
GRWD1		ZNF134
DLC1		PRSS35
PNO1		GINS1
HPS5		AMMECR1L
EPHB4		PLEKHF2
SLC12A9		ESR2
FBXO18		MSL3
CERS2		IKBKB
YTHDC1		TNFAIP8
RPL23AP82		WASF2
ASXL2		WFDC21P
IMPA2		SLC30A7
ISCU		GRIA4
ZDHHC12		RP11-90L1.8
MAP1S		C11orf68
CUL3		PTOV1-AS1
CKS2		HMOX1
HSD17B12		MIR155HG
SIDT2		HELB
UBE2G1		MOGS
PTPRF		VLDLR
ATF7		ELFN2
FRMPD3		CLK1
YWHAQ		POLR2M
PRKD1		KCNJ2
CUEDC1		ITGA5
TAF6		FAM167A
VPS26B		CSF2
MIER3		SMARCC1
SRA1		SIPA1L2
MYL6B		TTLL11
SSH2		RP11-400K9.4
PACS1		TOX
USP5		RASD2
IL4R		CEP55
KRT18		RP4-773N10.4
BANK1		C9orf84
SAMD1		MRPL42
TRIM69		ZNF844
SHANK2		NUAK1
PSMD1		NAA16
LINC01420		P2RX7
DPM3		RACGAP1
AXIN2		C7orf60
TMEM109		RGS18
GNL1		CCDC126
LCMT1		TXNL4B
ABCA1		PELI3
TPRG1L		CMBL
RHOBTB2		RARRES1
ATP8B1		MRS2
EFEMP1		HPS3
PMVK		BARD1
EBP		TSPAN14
LONP1		ATXN7L3B
CCDC93		GBAS
CBLL1		STEAP3
VPRBP		CCNC
ADAM33		ARL10
MLLT3		PLCL1
MYPOP		EFNA5
WLS		KIT
SIGMAR1		GPRASP2
SEC22C		RGS1
NFKBIA		CTBS
NUCB2		AREG
IRAK3		LINC00672
P2RX6		RP11-890B15.3
FAM46C		JOSD1
POLR3G		MARC1
OSTF1		AC006160.5
ARAP3		TIMP3
AFAP1		FOXC2
YARS		RNF217-AS1
STK39		NPTX1
MYL5		RAPGEF6
SMARCA1		TNFSF15
ARPIN		SDE2
CIITA		RP11-274B21.3
DDOST		CYFIP2
RAB10		ATG2A
GATSL2		RP3-331H24.7
MAPKAPK3		LRRC17
HIST1H1C		PPP2R3C
ARHGEF9		PDK2
L3MBTL1		GPRC5C
COX11		ZNF22
RP11-399O19.9		CBX1
C19orf70		RAB12
NACA		KIFC3
FBXO7		HDHD1
COL1A1		FHOD3
CLIC1		CASP8
SNAPC4		DUSP7
RPS25		HCG27
PCNT		VPS36
PABPC1		CTB-89H12.4
POMT2		NT5C3AP1
PROSER1		CTD-2047H16.3
PRR5		TMEM154
DOCK6		DCP2
ZBTB26		TTC39C
SDHC		CXCL12
SFI1		EMR1
NME4		ARL9
PLAG1		SLTM
STAT5A		PPP3CC
THOC2		STX11
FAM73B		C1orf115
STIL		EGFL7
XIAP		YWHAG
CTDSPL2		CDCA7L
SAT2		SMC2
RPS2P5		PDE12
H3F3B		ACHE
ATP11C		RGS4
GSTP1		PDK4
MPST		TMEM8B
CAPN10		TFAP2C
DVL3		PLCG2
SDAD1		BCL9
SLC25A13		OVGP1
ARHGAP22		GPSM2
PHLDB2		MATR3
PRPF19		SMC4
CFAP20		SLC6A15
HSPBAP1		ESM1
GFM1		CYP1A1
PTGER4		FAR1
PDHB		WNT5A-AS1
DNAJC4		TRA2A
TXNDC15		MECOM
RP11-100G15.7		FRAT2
VPS25		RP11-541N10.3
SELM		NHS
USP48		SARM1
CXCL3		TBC1D4
ZBED1		GBA
GPR124		ZNRF2
C19orf53		CTC-436P18.3
MAD1L1		KIF20B
RP11-67L2.2		MAPK13
NAMPTP1		RP11-175O19.4
NPDC1		MIDN
PLEKHA3		MIIP
SEZ6L2		ANKRD10-IT1
ARFGAP1		MVK
AIM1		TMEM168
EPS15		CCSAP
G3BP1		ZKSCAN2
WNT16		FOXJ2
USP44		TK2
MIEF1		KLF16
SKA1		RBM45
PCDHGB2		IL17RE
PIDD1		AKAP1
CCND2		SPOCD1
SRSF1		NCK1
KLC2		C8orf4
LYST		KCNH2
SPSB2		FABP3
SLC35F6		C9orf85
UTP6		SH3BGRL2
LMBR1L		KRT19
SGSM2		RAB23
KIAA1467		OTOF
NDUFS8		RPS20P22
AHCYL1		ZNF235
ENSA		NFATC2
B4GALT5		SLC16A6
CYP2U1
FAM63B
PSEN2
SOX11
CAP2
SLC11A2
SUPV3L1
SGSH
TYMS
PRDX6
TMEM261
UBE2L3
RMDN1
BBS2
TBPL1
DNAJA1
CGGBP1
FAM124A
UBAP2
SLC2A13
ATP5J2
DBT
HLA-K
PICALM
ABLIM1
DCLK2
LSM14B
ANKRD42
DCTN5
QPRT
NECAP2
PRKD3
SCART1
AZIN1
RARA
PACS2
SHOC2
RP3-323A16.1
SIVA1
MT-ATP8
PTCH2
TMED3
LINC01138
INO80
NR1H3
UTRN
CHD8
LINC01521
RP11-395L14.11
RRM1
TSPAN31
LRRC20
HINT3
GPR173
ARSG
GART
YOD1
ZNF721
FRS3
DENR
MOCOS
RP11-495P10.1
G6PC3
KPNA6
PPP1R18
C6orf136
FBXO42
TESK1
NEURL4
AES
BID
CDCA2
ACCS
PRR14L
FAM134A
RGS19
TLE4
KPNA3
TMEM170A
CYTH1
RSL24D1
ISYNA1
NUP153
CXCL1
PIAS3
EIF2B4
CACNA2D1
ZNF148
ALPK1
HADHB
RPE
ANGPT2
PSME3
COX7C
SERTAD3
SCYL2
TCEA1
LAMTOR3
CHRM2
SERTAD2
AASDHPPT
ZFX
YWHAB
LINC00094
DPP4
KLC4
MTHFD2
B3GAT3
GNS
SPRED1
MEIS3
NME3
SMAD1
AMOTL2
CUL4A
TP53BP1
PLP2
SEL1L3
CYTH2
FTL
SLC50A1
FAM65C
BMPR2
CENPBD1P1
CHAMP1
MPP5
BCAM
SF3A1
STAU1
ZNF585B
CD99
LAMA3
ADORA1
ZNF18
GMFB
ATG101
ZBTB1
SLC2A10
GID8
TNFAIP1
TONSL
SLK
ZSWIM4
TRIP10
PSAP
RP11-736N17.8
DDO
LINC01137
DCHS1
LRCH1
PRRC2C
TEAD1
CCDC8
DFFA
ZNF251
SLC9A3R1
CD34
GCN1L1
SMTN
GXYLT1
MLPH
C1RL
F3
UBE2Q2P1
DNAJC2
TOP1
TSKU
NUP160
FAT1
UBAC1
PRKCD
PCNX
DBP
ZNF71
NOMO1
RGMB
DTX3
PTPRS
ARVCF
ZNF785
SEC11A
ZDHHC8
COL6A3
C6orf47
PIGT
RNF144A
BBX
RHBDF1
CTDSP1
PPP2CB
ZNF438
CPEB3
KATNAL1
ZNF580
LAPTM4A
TADA2B
E2F5
GLB1
SH3RF2
TRAF3IP2
FKBP2
TTC8
MSANTD4
ARFGAP3
PPP1R37
KIAA1107
AP3S1
TRAF7
ANKRD10
SPTLC2
RRP15
SP140L
INO80D
B4GALT1
RP11-54O7.3
SNX3
RAPGEF2
ITGA3
BIN1
KCNAB2
CRIPAK
NT5DC3
RAB22A
KANK1
RP11-390P2.4
TPBG
LOXL4
ARHGEF1
PEX3
MAN1B1
ZNF598
DCAF8
RYR1
TMEM216
MRPS34
LYN
SCRN2
AKAP11
DES
FAM50A
SMS
ZNF37A
LEF1
SNX14
FYN
NUP205
RNF157
NEURL3
FEZ1
S100A13
FBLN2
TMBIM1
ENDOD1
SIX5
RICTOR
FAM76B
ELMOD3
RALGDS
RP11-467L13.5
GANC
NREP
ERLIN1
CD83
BVES
HSD17B7
HAX1
CLINT1
RUFY3
RP11-462G12.1
AIM2
BATF3
CARKD
LTBR
SNRNP48
BZW2
CMTR1
D2HGDH
FKBP1B
CYS1
COMMD7
BEST1
CYP2R1
UVSSA
NSUN2
LL21NC02-21A1.1
RBPJ
DRAP1
TIAF1
GNB1
SLC8A1-AS1
INHBA
DACT3
AKAP2
CCDC39
RAB34
BAK1
LUZP1
ELMO1
NACC1
LIG4
POLR2L
POLR2B
RPUSD1
FBF1
SH3YL1
SMARCD3
ECD
TMED5
TRIM66
APOBEC3D
HMGB3
TVP23B
SH3BP5-AS1
GTPBP2
CCSER2
RP5-882C2.2
ENG
ARL3
PLEKHM1
TMSB10P1
PCIF1
DAK
FAM13A
DNAJC21
AP3S2
CCNB1
SATB1
FAM126A
GRAMD1A
EDC3
UQCC2
DNAJB2
HMGA2
SYTL3
BUB3
SMAD3
TCEB2
RP11-818F20.5
PPP6R2
SNX2
FAM213B
ZNF646
DHRSX
MRPS25
SEC31B
PLA2G15
PRKDC
PI4KAP1
CCHCR1
MZF1
WNK1
GNAL
INO80C
MT2A
KIF23
ACAD10
TUBB4B
AMT
NDUFC2
CASC4
WDFY2
DNAJA2
GPR162
RP1-199J3.6
CARM1
RAD54L2
ANGEL1
POLR2D
CDK1
PVT1
CTD-2619J13.14
RP11-350N15.4
ANKLE2
IFT43
TMEM217
MKNK1
GUK1
PPP1R3E
ARHGEF18
S1PR2
RP11-465B22.3
UPF3A
C4orf48
EPHX4
OSBPL7
ALAD
ZNF292
RNF187
SCN3A
MAGEF1
SLC38A1
EIF3E
PDE4DIP
TOX2
HDX
ITGB1
RPL7A
SEC23IP
PREX1
NDUFA1
SMARCA4
SRRM2
ANO4
COL12A1
AHNAK
FGD4
OPA3
PHF11
REPIN1
HS3ST5
STX12
BDKRB2
EHD2
CTNNBIP1
PPP4R4
CSPG4
TBC1D5
COL14A1
MVB12B
RPS21
CTD-3035K23.7
MAP4K5
RRM2
ZC3H7A
YLPM1
FZD1
FAM86DP
PAICS
ITPK1
RNF181
MAPKAPK2
CTA-29F11.1
C11orf88
FOXN2
WDTC1
RPAIN
RP11-334C17.5
C5orf15
OTUD1
PLA2G12A
AMZ2
RRN3
GPR126
PPAPDC2
GSTA4
TMEM184B
TRIM41
RRAD
FAM160B2
REV1
CHMP5
PPP2R5C
DYNLL1
CWC22
WIPI2
ZFP62
PSMC3
FAM212A
NCKIPSD
TMCO1
ZNF609
BAMBI
MEF2C
FAM178A
C5orf51
PPRC1
THBS1
STT3A
PSMG2
MMADHC
PSMD11
PTPLB
RC3H1
ANXA1
COX10
LRP3
ZC3H6
NFE2
RPL36
PTOV1
HOOK2
DHFRL1
RAB13
USP1
ORMDL3
SAMD11
TPRN
RGL1
URI1
TARDBP
CTBP1-AS
MARCH3
SEH1L
TTC33
PACSIN3
AC093495.4
SLC25A37
PPP2R3B
FSTL3
SEC14L2
MT-ND4L
BRI3
STK25
WWP1
OXLD1
PI4KA
FAM109B
CAMTA2
HIAT1
ZFC3H1
HORMAD1
MAP2K3
ZNF692
MPHOSPH8
CHPF2
SRM
YIPF1
EPN1
TBC1D9B
SLC35D1
DVL2
ABHD14B
FBXL5
PIK3AP1
RP11-138A9.2
B4GALNT4
HOXC4
MICALL2
RBM6
CNTNAP1
RHEB
BCL10
MFSD11
C12orf57
KAT2A
RBM27
PROX1
ZNF517
PPP2R4
CPEB4
NFKB2
NCOA6
ARSJ
CEP250
C16orf52
ATP6V0D2
RAB31
CHORDC1
SERTAD1
APEH
ZFYVE28
SGMS1
RP11-524D16__A.3
SEMA4C
PLA2G6
FXYD5
TSC22D3
TMEM87A
TXNDC9
MNT
GAS1
NOP10
SOAT1
TMEM200B
TRIM33
RGS11
ETV6
COPZ1
FBXW8
ITM2C
JOSD2
MAMLD1
RRAGC
RNF214
CYB561A3
CTDNEP1
LRRC3
CCP110
ADCY7
ME3
RPRD1A
CRY2
PEX6
THYN1
PPIL1
FAM118B
TUBA3FP
CSNK2A2
TAF1B
RALGPS2
VPS35
CHCHD4
CYB5D2
CTD-2095E4.5
POLD4
ADRBK1
VRK1
ANG
CSTB
LMTK3
PTCHD4
C11orf1
RCOR2
RP11-29G8.3
RFWD2
AGT
TMEM25
MTOR
GBAP1
ANKMY1
CEBPD
NCAPG
FAM101B
PTPRM
PVRL2
CCND1
PPHLN1
ADCY9
TTLL3
[truncated: 595 more rows]

## Sheet: combinedresu_t0_erk3VSctrl
id	baseMean	log2FoldChange	lfcSE	stat	pvalue	padj	geneSymbol	description	siCntrl_t0_R1	siERK3_t0_R1	siCntrl_t0_R2	siERK3_t0_R2	siCntrl_t0_R3	siERK3_t0_R3	Description
ENSG00000023445	2029.12	-1.93366	0.0765697	-25.2536	1.03487e-140	1.60519e-136	BIRC3	baculoviral IAP repeat containing 3 [Source:HGNC Symbol;Acc:HGNC:591]	3365.78	856.004	3048.66	818.233	3298.02	788.04	baculoviral IAP repeat containing 3 [Source:HGNC Symbol;Acc:HGNC:591]
ENSG00000123610	1553.94	-1.84929	0.101967	-18.1362	1.64932e-73	1.27913e-69	TNFAIP6	TNF alpha induced protein 6 [Source:HGNC Symbol;Acc:HGNC:11898]	2575.1	713.536	2171.6	566.381	2638.17	658.853	TNF alpha induced protein 6 [Source:HGNC Symbol;Acc:HGNC:11898]
ENSG00000169245	10921	-2.0125	0.113494	-17.7323	2.36233e-70	1.2214e-66	CXCL10	C-X-C motif chemokine ligand 10 [Source:HGNC Symbol;Acc:HGNC:10637]	19228.4	4778.06	14757.5	3402.84	19298.7	4060.34	C-X-C motif chemokine ligand 10 [Source:HGNC Symbol;Acc:HGNC:10637]
ENSG00000131203	381.96	-2.78424	0.157638	-17.6623	8.18254e-70	3.17299e-66	IDO1	indoleamine 2,3-dioxygenase 1 [Source:HGNC Symbol;Acc:HGNC:6059]	655.304	92.185	573.722	72.9344	827.853	69.7609	indoleamine 2,3-dioxygenase 1 [Source:HGNC Symbol;Acc:HGNC:6059]
ENSG00000152749	1364.01	-1.4139	0.0820282	-17.2368	1.40635e-66	4.36279e-63	GPR180	G protein-coupled receptor 180 [Source:HGNC Symbol;Acc:HGNC:28899]	1913.84	768.607	2084.32	680.341	1994.15	742.825	G protein-coupled receptor 180 [Source:HGNC Symbol;Acc:HGNC:28899]
ENSG00000131979	1506.09	-1.53325	0.0930116	-16.4845	4.74413e-61	1.22644e-57	GCH1	GTP cyclohydrolase 1 [Source:HGNC Symbol;Acc:HGNC:4193]	2314.76	824.876	2053.8	686.039	2412.95	744.117	GTP cyclohydrolase 1 [Source:HGNC Symbol;Acc:HGNC:4193]
ENSG00000271503	911.861	-1.90851	0.120709	-15.8109	2.61684e-56	5.79855e-53	CCL5	C-C motif chemokine ligand 5 [Source:HGNC Symbol;Acc:HGNC:10632]	1459.37	360.36	1226.79	388.603	1710.49	325.551	C-C motif chemokine ligand 5 [Source:HGNC Symbol;Acc:HGNC:10632]
ENSG00000173391	4063.88	-1.35675	0.0886084	-15.3118	6.3791e-53	1.23683e-49	OLR1	oxidized low density lipoprotein receptor 1 [Source:HGNC Symbol;Acc:HGNC:8133]	5741.53	2336.95	5302.05	2056.98	6641.08	2304.69	oxidized low density lipoprotein receptor 1 [Source:HGNC Symbol;Acc:HGNC:8133]
ENSG00000120337	289.36	-2.17001	0.143902	-15.0798	2.19963e-51	3.79093e-48	TNFSF18	tumor necrosis factor superfamily member 18 [Source:HGNC Symbol;Acc:HGNC:11932]	476.043	102.96	457.757	76.3532	522.278	100.766	tumor necrosis factor superfamily member 18 [Source:HGNC Symbol;Acc:HGNC:11932]
ENSG00000154451	559.1	-1.75897	0.120217	-14.6316	1.76604e-48	2.73931e-45	GBP5	guanylate binding protein 5 [Source:HGNC Symbol;Acc:HGNC:19895]	965.476	262.189	812.366	202.849	854.636	257.082	guanylate binding protein 5 [Source:HGNC Symbol;Acc:HGNC:19895]
ENSG00000169248	2354.08	-1.68471	0.116267	-14.49	1.40042e-47	1.97472e-44	CXCL11	C-X-C motif chemokine ligand 11 [Source:HGNC Symbol;Acc:HGNC:10638]	3588.18	1213.97	3113.36	890.027	4241.53	1077.42	C-X-C motif chemokine ligand 11 [Source:HGNC Symbol;Acc:HGNC:10638]
ENSG00000197632	2256.67	-1.61309	0.113406	-14.2241	6.49774e-46	8.39887e-43	SERPINB2	serpin family B member 2 [Source:HGNC Symbol;Acc:HGNC:8584]	3675.95	978.119	3240.31	1315.1	3440.46	890.098	serpin family B member 2 [Source:HGNC Symbol;Acc:HGNC:8584]
ENSG00000122643	1066.24	-1.23695	0.0875096	-14.135	2.31004e-45	2.75624e-42	NT5C3A	5'-nucleotidase, cytosolic IIIA [Source:HGNC Symbol;Acc:HGNC:17820]	1530.78	684.803	1462.99	588.033	1533.96	596.844	5'-nucleotidase, cytosolic IIIA [Source:HGNC Symbol;Acc:HGNC:17820]
ENSG00000225492	542.387	-1.64471	0.118905	-13.8321	1.63111e-43	1.80715e-40	GBP1P1	guanylate binding protein 1 pseudogene 1 [Source:HGNC Symbol;Acc:HGNC:39561]	877.705	270.569	835.559	203.988	791.33	275.168	guanylate binding protein 1 pseudogene 1 [Source:HGNC Symbol;Acc:HGNC:39561]
ENSG00000159200	2803.39	-1.16281	0.0844633	-13.7671	4.0204e-43	4.15737e-40	RCAN1	regulator of calcineurin 1 [Source:HGNC Symbol;Acc:HGNC:3040]	3919.92	1890.39	4056.95	1712.82	3732.64	1507.61	regulator of calcineurin 1 [Source:HGNC Symbol;Acc:HGNC:3040]
ENSG00000163131	3392.34	-1.05662	0.0768826	-13.7433	5.58954e-43	5.41871e-40	CTSS	cathepsin S [Source:HGNC Symbol;Acc:HGNC:2545]	4737.38	2269.91	4178.41	2133.33	4909.9	2125.12	cathepsin S [Source:HGNC Symbol;Acc:HGNC:2545]
ENSG00000110057	2828.55	-0.869338	0.0640949	-13.5633	6.60992e-42	6.03097e-39	UNC93B1	unc-93 homolog B1 (C. elegans) [Source:HGNC Symbol;Acc:HGNC:13481]	3815.04	1977.79	3578.44	1973.79	3610.9	2015.32	unc-93 homolog B1 (C. elegans) [Source:HGNC Symbol;Acc:HGNC:13481]
ENSG00000056558	622.22	-1.53439	0.113546	-13.5134	1.30354e-41	1.12329e-38	TRAF1	TNF receptor associated factor 1 [Source:HGNC Symbol;Acc:HGNC:12031]	1033.91	294.513	818.47	303.134	964.205	319.092	TNF receptor associated factor 1 [Source:HGNC Symbol;Acc:HGNC:12031]
ENSG00000165633	1002.94	1.07651	0.0799444	13.4658	2.48684e-41	2.03018e-38	VSTM4	V-set and transmembrane domain containing 4 [Source:HGNC Symbol;Acc:HGNC:26470]	643.403	1356.44	639.029	1333.33	626.977	1418.47	V-set and transmembrane domain containing 4 [Source:HGNC Symbol;Acc:HGNC:26470]
ENSG00000115963	21945.4	-0.842245	0.06257	-13.4608	2.65852e-41	2.06181e-38	RND3	Rho family GTPase 3 [Source:HGNC Symbol;Acc:HGNC:671]	28391.5	16060.5	29500.9	16067.2	26901.6	14750.6	Rho family GTPase 3 [Source:HGNC Symbol;Acc:HGNC:671]
ENSG00000148677	327.352	-1.82235	0.136448	-13.3556	1.09928e-40	8.11953e-38	ANKRD1	ankyrin repeat domain 1 [Source:HGNC Symbol;Acc:HGNC:15819]	516.953	154.44	484.002	127.635	566.105	114.976	ankyrin repeat domain 1 [Source:HGNC Symbol;Acc:HGNC:15819]
ENSG00000168542	90436.3	0.860462	0.0647649	13.2859	2.79334e-40	1.96943e-37	COL3A1	collagen type III alpha 1 chain [Source:HGNC Symbol;Acc:HGNC:2201]	60920.9	115371	67076.7	111015	63499.9	124734	collagen type III alpha 1 chain [Source:HGNC Symbol;Acc:HGNC:2201]
ENSG00000168961	1304.07	-1.27438	0.0964092	-13.2184	6.86938e-40	4.63265e-37	LGALS9	galectin 9 [Source:HGNC Symbol;Acc:HGNC:6570]	1849.13	786.566	1756.57	641.595	1984.41	806.126	galectin 9 [Source:HGNC Symbol;Acc:HGNC:6570]
ENSG00000162654	3035.38	-1.44816	0.111915	-12.9398	2.6839e-38	1.73458e-35	GBP4	guanylate binding protein 4 [Source:HGNC Symbol;Acc:HGNC:20480]	4603.49	1739.54	3978.22	1250.14	4933.03	1707.85	guanylate binding protein 4 [Source:HGNC Symbol;Acc:HGNC:20480]
ENSG00000139278	1106.57	-1.02279	0.0792539	-12.9052	4.20735e-38	2.61041e-35	GLIPR1	GLI pathogenesis related 1 [Source:HGNC Symbol;Acc:HGNC:17001]	1457.88	732.691	1536.23	699.714	1480.4	732.49	GLI pathogenesis related 1 [Source:HGNC Symbol;Acc:HGNC:17001]
ENSG00000054793	3380.59	0.897724	0.0696128	12.896	4.7428e-38	2.82945e-35	ATP9A	ATPase phospholipid transporting 9A (putative) [Source:HGNC Symbol;Acc:HGNC:13540]	2418.15	4217.76	2412.69	4423.93	2192.59	4618.43	ATPase phospholipid transporting 9A (putative) [Source:HGNC Symbol;Acc:HGNC:13540]
ENSG00000137496	1015.09	-1.25495	0.0977963	-12.8323	1.08103e-37	6.21029e-35	IL18BP	interleukin 18 binding protein [Source:HGNC Symbol;Acc:HGNC:5987]	1532.26	657.267	1339.09	547.008	1464.57	550.336	interleukin 18 binding protein [Source:HGNC Symbol;Acc:HGNC:5987]
ENSG00000150938	9706.93	-0.865935	0.0676618	-12.798	1.68252e-37	9.32058e-35	CRIM1	cysteine rich transmembrane BMP regulator 1 [Source:HGNC Symbol;Acc:HGNC:2359]	12322.1	7286.21	12361.9	6308.82	13067.9	6894.71	cysteine rich transmembrane BMP regulator 1 [Source:HGNC Symbol;Acc:HGNC:2359]
ENSG00000117899	1405.04	0.910454	0.0713134	12.7669	2.50852e-37	1.34171e-34	MESDC2	mesoderm development candidate 2 [Source:HGNC Symbol;Acc:HGNC:13520]	956.55	1808.98	980.821	1852.99	965.422	1865.46	mesoderm development candidate 2 [Source:HGNC Symbol;Acc:HGNC:13520]
ENSG00000106392	731.038	-1.18874	0.0935855	-12.7022	5.75219e-37	2.97408e-34	C1GALT1	core 1 synthase, glycoprotein-N-acetylgalactosamine 3-beta-galactosyltransferase 1 [Source:HGNC Symbol;Acc:HGNC:24337]	1057.71	456.136	1021.1	404.558	995.858	450.862	core 1 synthase, glycoprotein-N-acetylgalactosamine 3-beta-galactosyltransferase 1 [Source:HGNC Symbol;Acc:HGNC:24337]
ENSG00000095303	6428.98	1.04277	0.0825636	12.6299	1.44532e-36	7.23171e-34	PTGS1	prostaglandin-endoperoxide synthase 1 [Source:HGNC Symbol;Acc:HGNC:9604]	4282.9	7803.4	4142.4	8502.55	4010.21	9832.42	prostaglandin-endoperoxide synthase 1 [Source:HGNC Symbol;Acc:HGNC:9604]
ENSG00000140105	36256.3	-1.08879	0.0864574	-12.5934	2.29576e-36	1.1128e-33	WARS	tryptophanyl-tRNA synthetase [Source:HGNC Symbol;Acc:HGNC:12729]	51121.1	25376	46894.5	19548.7	51023.7	23574	tryptophanyl-tRNA synthetase [Source:HGNC Symbol;Acc:HGNC:12729]
ENSG00000116717	1713.57	-1.11682	0.0888557	-12.5689	3.12861e-36	1.47054e-33	GADD45A	growth arrest and DNA damage inducible alpha [Source:HGNC Symbol;Acc:HGNC:4095]	2474.68	1167.28	2398.04	1081.48	2218.16	941.773	growth arrest and DNA damage inducible alpha [Source:HGNC Symbol;Acc:HGNC:4095]
ENSG00000164211	3027.78	-1.25371	0.101127	-12.3973	2.70258e-35	1.19771e-32	STARD4	StAR related lipid transfer domain containing 4 [Source:HGNC Symbol;Acc:HGNC:18058]	4049.34	2019.69	4667.29	1466.66	4218.4	1745.32	StAR related lipid transfer domain containing 4 [Source:HGNC Symbol;Acc:HGNC:18058]
ENSG00000104951	593.715	-1.39018	0.112122	-12.3988	2.65301e-35	1.19771e-32	IL4I1	interleukin 4 induced 1 [Source:HGNC Symbol;Acc:HGNC:19094]	919.359	312.471	759.267	313.39	937.421	320.384	interleukin 4 induced 1 [Source:HGNC Symbol;Acc:HGNC:19094]
ENSG00000111912	5101.94	-1.06057	0.0855762	-12.3933	2.8411e-35	1.22412e-32	NCOA7	nuclear receptor coactivator 7 [Source:HGNC Symbol;Acc:HGNC:21081]	7323.63	3622.75	6300.57	2981.19	7213.27	3170.25	nuclear receptor coactivator 7 [Source:HGNC Symbol;Acc:HGNC:21081]
ENSG00000178343	650.254	-1.61398	0.131118	-12.3093	8.07001e-35	3.38308e-32	SHISA3	shisa family member 3 [Source:HGNC Symbol;Acc:HGNC:25159]	815.968	280.147	980.211	309.971	1206.47	308.757	shisa family member 3 [Source:HGNC Symbol;Acc:HGNC:25159]
ENSG00000013297	2602.71	-1.10547	0.0903194	-12.2396	1.91089e-34	7.79994e-32	CLDN11	claudin 11 [Source:HGNC Symbol;Acc:HGNC:8514]	3493.71	1745.53	3966.62	1667.23	3284.63	1458.52	claudin 11 [Source:HGNC Symbol;Acc:HGNC:8514]
ENSG00000002549	16307.3	-0.940469	0.0769374	-12.2238	2.31929e-34	9.22425e-32	LAP3	leucine aminopeptidase 3 [Source:HGNC Symbol;Acc:HGNC:18449]	21826.6	12134.9	20307.9	9988.59	22529.8	11055.8	leucine aminopeptidase 3 [Source:HGNC Symbol;Acc:HGNC:18449]
ENSG00000103966	2331.52	-0.802814	0.066264	-12.1154	8.75426e-34	3.39468e-31	EHD4	EH domain containing 4 [Source:HGNC Symbol;Acc:HGNC:3245]	3025.11	1750.32	2925.98	1626.21	2971.75	1689.76	EH domain containing 4 [Source:HGNC Symbol;Acc:HGNC:3245]
ENSG00000153904	1698.08	-0.873451	0.0723461	-12.0732	1.46278e-33	5.53394e-31	DDAH1	dimethylarginine dimethylaminohydrolase 1 [Source:HGNC Symbol;Acc:HGNC:2715]	2131.78	1231.93	2283.29	1181.76	2204.77	1154.93	dimethylarginine dimethylaminohydrolase 1 [Source:HGNC Symbol;Acc:HGNC:2715]
ENSG00000148154	5311.04	-1.01227	0.0842484	-12.0154	2.95086e-33	1.08978e-30	UGCG	UDP-glucose ceramide glucosyltransferase [Source:HGNC Symbol;Acc:HGNC:12524]	6891.47	3790.36	6737.58	3123.64	7818.34	3504.84	UDP-glucose ceramide glucosyltransferase [Source:HGNC Symbol;Acc:HGNC:12524]
ENSG00000090339	8204.16	-1.07736	0.0897055	-12.01	3.14844e-33	1.13571e-30	ICAM1	intercellular adhesion molecule 1 [Source:HGNC Symbol;Acc:HGNC:5344]	12475.3	5042.64	9495.1	5376.63	11689.8	5145.51	intercellular adhesion molecule 1 [Source:HGNC Symbol;Acc:HGNC:5344]
ENSG00000205436	266.755	-1.81866	0.152392	-11.9341	7.85914e-33	2.77052e-30	EXOC3L4	exocyst complex component 3 like 4 [Source:HGNC Symbol;Acc:HGNC:20120]	479.763	118.524	415.644	83.1908	387.143	116.268	exocyst complex component 3 like 4 [Source:HGNC Symbol;Acc:HGNC:20120]
ENSG00000029153	2387.89	-0.879883	0.0737835	-11.9252	8.74733e-33	3.01511e-30	ARNTL2	aryl hydrocarbon receptor nuclear translocator like 2 [Source:HGNC Symbol;Acc:HGNC:18984]	3301.06	1765.88	3007.16	1612.53	3016.79	1623.88	aryl hydrocarbon receptor nuclear translocator like 2 [Source:HGNC Symbol;Acc:HGNC:18984]
ENSG00000138385	1268.84	-1.02424	0.0867087	-11.8124	3.36872e-32	1.13592e-29	SSB	Sjogren syndrome antigen B [Source:HGNC Symbol;Acc:HGNC:11316]	1757.64	911.075	1745.58	769.23	1635.01	794.5	Sjogren syndrome antigen B [Source:HGNC Symbol;Acc:HGNC:11316]
ENSG00000136160	288.117	1.70547	0.145058	11.7571	6.48885e-32	2.14146e-29	EDNRB	endothelin receptor type B [Source:HGNC Symbol;Acc:HGNC:3180]	135.375	379.515	127.562	475.213	105.916	505.121	endothelin receptor type B [Source:HGNC Symbol;Acc:HGNC:3180]
ENSG00000121858	1296.31	-1.6276	0.138583	-11.7446	7.53028e-32	2.43338e-29	TNFSF10	tumor necrosis factor superfamily member 10 [Source:HGNC Symbol;Acc:HGNC:11925]	1910.87	630.929	1649.15	458.119	2453.12	675.648	tumor necrosis factor superfamily member 10 [Source:HGNC Symbol;Acc:HGNC:11925]
ENSG00000157613	6045.9	0.723365	0.0619669	11.6734	1.74304e-31	5.51761e-29	CREB3L1	cAMP responsive element binding protein 3 like 1 [Source:HGNC Symbol;Acc:HGNC:18856]	4593.08	7326.91	4650.81	7940.73	4371.79	7392.08	cAMP responsive element binding protein 3 like 1 [Source:HGNC Symbol;Acc:HGNC:18856]
ENSG00000133816	3181.42	1.0145	0.0878958	11.5421	8.09098e-31	2.50999e-28	MICAL2	microtubule associated monooxygenase, calponin and LIM domain containing 2 [Source:HGNC Symbol;Acc:HGNC:24693]	2200.96	3876.56	2143.52	4736.18	1878.49	4252.83	microtubule associated monooxygenase, calponin and LIM domain containing 2 [Source:HGNC Symbol;Acc:HGNC:24693]
ENSG00000172183	4920.62	-0.876549	0.0759697	-11.5382	8.47272e-31	2.57687e-28	ISG20	interferon stimulated exonuclease gene 20 [Source:HGNC Symbol;Acc:HGNC:6130]	6991.89	3479.09	5789.71	3454.13	6426.81	3382.11	interferon stimulated exonuclease gene 20 [Source:HGNC Symbol;Acc:HGNC:6130]
ENSG00000196776	7848.76	-0.770612	0.0670008	-11.5015	1.29571e-30	3.86496e-28	CD47	CD47 molecule [Source:HGNC Symbol;Acc:HGNC:1682]	9694.92	6237.45	9927.23	5431.33	10171.6	5629.97	CD47 molecule [Source:HGNC Symbol;Acc:HGNC:1682]
ENSG00000102524	3394.08	-1.14236	0.0997546	-11.4517	2.30458e-30	6.74459e-28	TNFSF13B	tumor necrosis factor superfamily member 13b [Source:HGNC Symbol;Acc:HGNC:11929]	4478.53	2390.82	4495.18	1769.8	5183.82	2046.32	tumor necrosis factor superfamily member 13b [Source:HGNC Symbol;Acc:HGNC:11929]
ENSG00000092820	2468.14	-0.838976	0.0735212	-11.4113	3.6701e-30	1.0542e-27	EZR	ezrin [Source:HGNC Symbol;Acc:HGNC:12691]	3199.9	1895.18	3062.09	1680.91	3280.97	1689.76	ezrin [Source:HGNC Symbol;Acc:HGNC:12691]
ENSG00000171860	151.143	-2.05088	0.179882	-11.4012	4.12277e-30	1.1627e-27	C3AR1	complement C3a receptor 1 [Source:HGNC Symbol;Acc:HGNC:1319]	264.055	53.8744	217.282	47.8632	282.444	41.3398	complement C3a receptor 1 [Source:HGNC Symbol;Acc:HGNC:1319]
ENSG00000164342	1786.92	-1.11158	0.0975941	-11.3898	4.70086e-30	1.30206e-27	TLR3	toll like receptor 3 [Source:HGNC Symbol;Acc:HGNC:11849]	2308.07	1198.41	2475.55	933.332	2615.04	1191.1	toll like receptor 3 [Source:HGNC Symbol;Acc:HGNC:11849]
ENSG00000184371	13820.5	-0.651194	0.0573041	-11.3638	6.33129e-30	1.72289e-27	CSF1	colony stimulating factor 1 [Source:HGNC Symbol;Acc:HGNC:2432]	17829.3	10776.1	16468.3	10771.5	16477.9	10599.8	colony stimulating factor 1 [Source:HGNC Symbol;Acc:HGNC:2432]
ENSG00000104415	1947.97	-1.23059	0.108578	-11.3337	8.93036e-30	2.38825e-27	WISP1	WNT1 inducible signaling pathway protein 1 [Source:HGNC Symbol;Acc:HGNC:12769]	2747.66	1157.7	2537.81	925.355	3011.92	1307.37	WNT1 inducible signaling pathway protein 1 [Source:HGNC Symbol;Acc:HGNC:12769]
ENSG00000004468	172.558	-2.14693	0.190593	-11.2645	1.96457e-29	5.07875e-27	CD38	CD38 molecule [Source:HGNC Symbol;Acc:HGNC:1667]	337.693	68.2408	242.306	36.4672	308.01	42.6317	CD38 molecule [Source:HGNC Symbol;Acc:HGNC:1667]
ENSG00000089597	10248.1	0.598631	0.0531405	11.2651	1.95224e-29	5.07875e-27	GANAB	glucosidase II alpha subunit [Source:HGNC Symbol;Acc:HGNC:4138]	8356.05	12276.2	8099.25	12357.8	7930.34	12469.1	glucosidase II alpha subunit [Source:HGNC Symbol;Acc:HGNC:4138]
ENSG00000000971	2129.81	-1.07206	0.09525	-11.2552	2.18381e-29	5.55296e-27	CFH	complement factor H [Source:HGNC Symbol;Acc:HGNC:4883]	2966.35	1520.45	2842.37	1131.62	2926.7	1391.34	complement factor H [Source:HGNC Symbol;Acc:HGNC:4883]
ENSG00000186480	4765.93	-0.863068	0.0772229	-11.1763	5.32548e-29	1.33232e-26	INSIG1	insulin induced gene 1 [Source:HGNC Symbol;Acc:HGNC:6083]	6291.21	3749.65	6171.79	3209.11	6081.06	3092.73	insulin induced gene 1 [Source:HGNC Symbol;Acc:HGNC:6083]
ENSG00000113594	2454.22	-1.13533	0.1021	-11.1199	1.0042e-28	2.4724e-26	LIFR	leukemia inhibitory factor receptor alpha [Source:HGNC Symbol;Acc:HGNC:6597]	3054.86	1729.97	3543.04	1287.75	3627.94	1481.77	leukemia inhibitory factor receptor alpha [Source:HGNC Symbol;Acc:HGNC:6597]
ENSG00000100600	2332.16	-0.951232	0.0857964	-11.0871	1.44929e-28	3.51249e-26	LGMN	legumain [Source:HGNC Symbol;Acc:HGNC:9472]	3071.97	1555.17	2764.85	1556.69	3451.41	1592.87	legumain [Source:HGNC Symbol;Acc:HGNC:9472]
ENSG00000143398	1931.05	-0.784621	0.071282	-11.0073	3.52509e-28	8.41194e-26	PIP5K1A	phosphatidylinositol-4-phosphate 5-kinase type 1 alpha [Source:HGNC Symbol;Acc:HGNC:8994]	2590.72	1423.48	2405.97	1394.87	2361.81	1409.43	phosphatidylinositol-4-phosphate 5-kinase type 1 alpha [Source:HGNC Symbol;Acc:HGNC:8994]
ENSG00000120526	1377.61	-0.864597	0.078897	-10.9586	6.04582e-28	1.42086e-25	NUDCD1	NudC domain containing 1 [Source:HGNC Symbol;Acc:HGNC:24306]	1724.91	1014.04	1768.77	913.959	1871.19	972.777	NudC domain containing 1 [Source:HGNC Symbol;Acc:HGNC:24306]
ENSG00000134954	1820.82	-0.834602	0.0761842	-10.9551	6.28351e-28	1.45468e-25	ETS1	ETS proto-oncogene 1, transcription factor [Source:HGNC Symbol;Acc:HGNC:3488]	2500.72	1278.62	2264.37	1356.12	2268.07	1256.99	ETS proto-oncogene 1, transcription factor [Source:HGNC Symbol;Acc:HGNC:3488]
ENSG00000186340	2134.45	1.1971	0.110953	10.7892	3.87147e-27	8.83094e-25	THBS2	thrombospondin 2 [Source:HGNC Symbol;Acc:HGNC:11786]	1162.59	2581.18	1146.83	3014.24	1470.66	3431.2	thrombospondin 2 [Source:HGNC Symbol;Acc:HGNC:11786]
ENSG00000169429	15413.4	-0.998595	0.0927172	-10.7703	4.75283e-27	1.06842e-24	CXCL8	C-X-C motif chemokine ligand 8 [Source:HGNC Symbol;Acc:HGNC:6025]	21866.8	9405.26	17472.9	10876.3	22792.7	10066.2	C-X-C motif chemokine ligand 8 [Source:HGNC Symbol;Acc:HGNC:6025]
ENSG00000115353	498.304	1.43748	0.135139	10.6371	2.00346e-26	4.43939e-24	TACR1	tachykinin receptor 1 [Source:HGNC Symbol;Acc:HGNC:11526]	251.41	707.55	307.613	801.139	194.789	727.322	tachykinin receptor 1 [Source:HGNC Symbol;Acc:HGNC:11526]
ENSG00000255248	1414.85	-0.808911	0.0763236	-10.5984	3.02993e-26	6.54005e-24	RP11-166D19.1	mir-100-let-7a-2 cluster host gene [Source:HGNC Symbol;Acc:HGNC:39522]	1800.04	1049.95	1896.34	1014.24	1731.19	997.323	mir-100-let-7a-2 cluster host gene [Source:HGNC Symbol;Acc:HGNC:39522]
ENSG00000080573	494.046	1.371	0.129361	10.5983	3.0358e-26	6.54005e-24	COL5A3	collagen type V alpha 3 chain [Source:HGNC Symbol;Acc:HGNC:14864]	289.345	604.59	267.941	794.301	225.225	782.873	collagen type V alpha 3 chain [Source:HGNC Symbol;Acc:HGNC:14864]
ENSG00000168404	2546.92	-0.735545	0.0696532	-10.5601	4.56168e-26	9.69263e-24	MLKL	mixed lineage kinase domain like [Source:HGNC Symbol;Acc:HGNC:26617]	3329.33	1892.79	3087.72	1814.24	3164.1	1993.35	mixed lineage kinase domain like [Source:HGNC Symbol;Acc:HGNC:26617]
ENSG00000162981	614.528	-1.18711	0.113209	-10.486	1.00171e-25	2.09966e-23	FAM84A	family with sequence similarity 84 member A [Source:HGNC Symbol;Acc:HGNC:20743]	873.986	419.023	927.111	327.065	793.764	346.221	family with sequence similarity 84 member A [Source:HGNC Symbol;Acc:HGNC:20743]
ENSG00000117228	13024.4	-1.16057	0.110721	-10.4819	1.04644e-25	2.14553e-23	GBP1	guanylate binding protein 1 [Source:HGNC Symbol;Acc:HGNC:4182]	18229.5	9337.02	17282.5	6102.56	19166	8028.97	guanylate binding protein 1 [Source:HGNC Symbol;Acc:HGNC:4182]
ENSG00000111335	17102.3	-0.703838	0.0671509	-10.4814	1.05126e-25	2.14553e-23	OAS2	2'-5'-oligoadenylate synthetase 2 [Source:HGNC Symbol;Acc:HGNC:8087]	21777.5	13814.6	20557.6	11900.8	21453.6	13109.9	2'-5'-oligoadenylate synthetase 2 [Source:HGNC Symbol;Acc:HGNC:8087]
ENSG00000187134	474.525	1.18495	0.113137	10.4736	1.14254e-25	2.30154e-23	AKR1C1	aldo-keto reductase family 1 member C1 [Source:HGNC Symbol;Acc:HGNC:384]	284.138	595.012	296.016	709.971	260.53	701.485	aldo-keto reductase family 1 member C1 [Source:HGNC Symbol;Acc:HGNC:384]
ENSG00000108854	4479.46	-0.798104	0.0763873	-10.4481	1.49445e-25	2.97186e-23	SMURF2	SMAD specific E3 ubiquitin protein ligase 2 [Source:HGNC Symbol;Acc:HGNC:16809]	5853.85	3486.27	5988.68	3251.28	5298.26	2998.43	SMAD specific E3 ubiquitin protein ligase 2 [Source:HGNC Symbol;Acc:HGNC:16809]
ENSG00000165731	324.198	-1.34115	0.128468	-10.4395	1.63598e-25	3.21211e-23	RET	ret proto-oncogene [Source:HGNC Symbol;Acc:HGNC:9967]	479.019	195.145	440.057	164.102	502.799	164.067	ret proto-oncogene [Source:HGNC Symbol;Acc:HGNC:9967]
ENSG00000126950	289.145	1.37527	0.132083	10.4122	2.18183e-25	4.2303e-23	TMEM35	transmembrane protein 35A [Source:HGNC Symbol;Acc:HGNC:25864]	132.4	422.614	167.844	407.977	157.048	446.987	transmembrane protein 35A [Source:HGNC Symbol;Acc:HGNC:25864]
ENSG00000168062	3037.62	-1.13361	0.109182	-10.3828	2.96927e-25	5.68597e-23	BATF2	basic leucine zipper ATF-like transcription factor 2 [Source:HGNC Symbol;Acc:HGNC:25163]	4771.59	2068.78	4405.46	1631.91	3491.59	1856.42	basic leucine zipper ATF-like transcription factor 2 [Source:HGNC Symbol;Acc:HGNC:25163]
ENSG00000137842	1234.31	-0.851798	0.0825856	-10.3141	6.08394e-25	1.15083e-22	TMEM62	transmembrane protein 62 [Source:HGNC Symbol;Acc:HGNC:26269]	1566.48	887.131	1533.79	904.842	1695.88	817.753	transmembrane protein 62 [Source:HGNC Symbol;Acc:HGNC:26269]
ENSG00000173786	7193.15	-0.631326	0.061227	-10.3112	6.26968e-25	1.17167e-22	CNP	2',3'-cyclic nucleotide 3' phosphodiesterase [Source:HGNC Symbol;Acc:HGNC:2158]	9099.12	5790.89	8661.99	5348.14	8529.32	5729.44	2',3'-cyclic nucleotide 3' phosphodiesterase [Source:HGNC Symbol;Acc:HGNC:2158]
ENSG00000164305	1098.8	-0.895333	0.0869442	-10.2978	7.20971e-25	1.31564e-22	CASP3	caspase 3 [Source:HGNC Symbol;Acc:HGNC:1504]	1395.4	736.283	1434.92	707.691	1485.26	833.256	caspase 3 [Source:HGNC Symbol;Acc:HGNC:1504]
ENSG00000198743	2938.48	0.731206	0.0710041	10.2981	7.18798e-25	1.31564e-22	SLC5A3	solute carrier family 5 member 3 [Source:HGNC Symbol;Acc:HGNC:11038]	2115.42	3754.44	2366.91	3586.32	2098.85	3708.96	solute carrier family 5 member 3 [Source:HGNC Symbol;Acc:HGNC:11038]
ENSG00000175727	2604.61	0.762105	0.0740586	10.2906	7.77095e-25	1.40157e-22	MLXIP	MLX interacting protein [Source:HGNC Symbol;Acc:HGNC:17055]	1967.4	3254.01	1882.3	3062.1	1904.06	3557.81	MLX interacting protein [Source:HGNC Symbol;Acc:HGNC:17055]
ENSG00000120217	3005.55	-0.974188	0.0954041	-10.2112	1.76713e-24	3.15056e-22	CD274	CD274 molecule [Source:HGNC Symbol;Acc:HGNC:17635]	4472.58	2072.37	4008.73	1764.1	3565.85	2149.67	CD274 molecule [Source:HGNC Symbol;Acc:HGNC:17635]
ENSG00000183486	10254.3	-0.742651	0.0727809	-10.2039	1.90412e-24	3.35622e-22	MX2	MX dynamin like GTPase 2 [Source:HGNC Symbol;Acc:HGNC:7533]	13058.5	7747.13	12404.6	6884.32	13201.8	8229.21	MX dynamin like GTPase 2 [Source:HGNC Symbol;Acc:HGNC:7533]
ENSG00000163347	5278.77	-0.883298	0.0866281	-10.1964	2.0568e-24	3.58462e-22	CLDN1	claudin 1 [Source:HGNC Symbol;Acc:HGNC:2032]	7426.28	3613.17	6773.59	4112.82	6471.86	3274.89	claudin 1 [Source:HGNC Symbol;Acc:HGNC:2032]
ENSG00000109929	920.635	-1.08398	0.106382	-10.1895	2.20968e-24	3.80826e-22	SC5D	sterol-C5-desaturase [Source:HGNC Symbol;Acc:HGNC:10547]	1103.83	632.126	1394.02	547.008	1297.78	549.044	sterol-C5-desaturase [Source:HGNC Symbol;Acc:HGNC:10547]
ENSG00000119917	56665.3	-0.833179	0.0818223	-10.1828	2.36704e-24	4.03463e-22	IFIT3	interferon induced protein with tetratricopeptide repeats 3 [Source:HGNC Symbol;Acc:HGNC:5411]	71129.1	44590	69053.6	35964.6	78790.9	40463.9	interferon induced protein with tetratricopeptide repeats 3 [Source:HGNC Symbol;Acc:HGNC:5411]
ENSG00000135842	3553.85	-0.702613	0.0690189	-10.18	2.43569e-24	4.10651e-22	FAM129A	family with sequence similarity 129 member A [Source:HGNC Symbol;Acc:HGNC:16784]	4675.64	2837.38	4304.75	2619.94	4271.96	2613.45	family with sequence similarity 129 member A [Source:HGNC Symbol;Acc:HGNC:16784]
ENSG00000134363	9358.07	-0.728066	0.0723011	-10.0699	7.50383e-24	1.25153e-21	FST	follistatin [Source:HGNC Symbol;Acc:HGNC:3971]	11926.4	6717.53	11589.2	7753.84	11635	6526.52	follistatin [Source:HGNC Symbol;Acc:HGNC:3971]
ENSG00000137198	2738.27	-0.803094	0.0798276	-10.0603	8.27058e-24	1.36473e-21	GMPR	guanosine monophosphate reductase [Source:HGNC Symbol;Acc:HGNC:4376]	3620.91	2047.23	3160.36	1876.92	3719.25	2004.98	guanosine monophosphate reductase [Source:HGNC Symbol;Acc:HGNC:4376]
ENSG00000050344	2966.82	-0.744563	0.0741237	-10.0449	9.67835e-24	1.58022e-21	NFE2L3	nuclear factor, erythroid 2 like 3 [Source:HGNC Symbol;Acc:HGNC:7783]	3606.03	2299.84	3576.61	2222.22	4016.3	2079.91	nuclear factor, erythroid 2 like 3 [Source:HGNC Symbol;Acc:HGNC:7783]
ENSG00000111077	2058.96	0.696677	0.069416	10.0363	1.05607e-23	1.70633e-21	TNS2	tensin 2 [Source:HGNC Symbol;Acc:HGNC:19737]	1532.26	2523.71	1638.77	2512.82	1512.05	2634.12	tensin 2 [Source:HGNC Symbol;Acc:HGNC:19737]
ENSG00000038274	1744.43	-0.880515	0.0880336	-10.002	1.4931e-23	2.38757e-21	MAT2B	methionine adenosyltransferase 2B [Source:HGNC Symbol;Acc:HGNC:6905]	2128.06	1261.86	2301.6	1075.78	2398.34	1300.91	methionine adenosyltransferase 2B [Source:HGNC Symbol;Acc:HGNC:6905]
ENSG00000151892	2018.65	-0.859177	0.0862342	-9.96329	2.2064e-23	3.49219e-21	GFRA1	GDNF family receptor alpha 1 [Source:HGNC Symbol;Acc:HGNC:4243]	2421.87	1486.93	2552.45	1309.4	2885.31	1455.94	GDNF family receptor alpha 1 [Source:HGNC Symbol;Acc:HGNC:4243]
ENSG00000155380	1154.2	-0.850818	0.0855216	-9.94857	2.55822e-23	4.00814e-21	SLC16A1	solute carrier family 16 member 1 [Source:HGNC Symbol;Acc:HGNC:10922]	1436.31	856.004	1436.14	794.301	1613.09	789.332	solute carrier family 16 member 1 [Source:HGNC Symbol;Acc:HGNC:10922]
ENSG00000117475	2542.6	-0.827906	0.0834353	-9.92274	3.31544e-23	5.09167e-21	BLZF1	basic leucine zipper nuclear factor 1 [Source:HGNC Symbol;Acc:HGNC:1065]	3309.25	2053.21	3320.88	1691.17	3183.58	1697.52	basic leucine zipper nuclear factor 1 [Source:HGNC Symbol;Acc:HGNC:1065]
ENSG00000164164	2233.18	-0.759783	0.0765682	-9.92296	3.30786e-23	5.09167e-21	OTUD4	OTU deubiquitinase 4 [Source:HGNC Symbol;Acc:HGNC:24949]	2845.85	1758.7	2849.69	1492.88	2764.78	1687.18	OTU deubiquitinase 4 [Source:HGNC Symbol;Acc:HGNC:24949]
ENSG00000226025	54.548	-2.42665	0.245476	-9.8855	4.81197e-23	7.3175e-21	LGALS17A	galectin 14 pseudogene [Source:EntrezGene;Acc:400696]	134.631	8.38045	85.448	2.2792	90.0898	6.45935	galectin 14 pseudogene [Source:EntrezGene;Acc:400696]
ENSG00000125347	7786.68	-0.903848	0.0914447	-9.8841	4.87944e-23	7.34805e-21	IRF1	interferon regulatory factor 1 [Source:HGNC Symbol;Acc:HGNC:6116]	11785.1	5681.95	9107.54	4960.68	9778.4	5406.47	interferon regulatory factor 1 [Source:HGNC Symbol;Acc:HGNC:6116]
ENSG00000173801	3751.33	1.20673	0.122717	9.83345	8.08029e-23	1.20513e-20	JUP	junction plakoglobin [Source:HGNC Symbol;Acc:HGNC:6207]	2453.11	4059.73	2191.13	5943.01	1901.63	5959.39	junction plakoglobin [Source:HGNC Symbol;Acc:HGNC:6207]
ENSG00000102760	222.842	1.5636	0.159434	9.80723	1.04803e-22	1.54819e-20	RGCC	regulator of cell cycle [Source:HGNC Symbol;Acc:HGNC:20369]	110.829	295.71	111.693	399.999	80.3504	338.47	regulator of cell cycle [Source:HGNC Symbol;Acc:HGNC:20369]
ENSG00000172123	1354.07	-0.984321	0.100514	-9.79292	1.20763e-22	1.76712e-20	SLFN12	schlafen family member 12 [Source:HGNC Symbol;Acc:HGNC:25500]	1746.48	1027.2	1918.92	765.811	1781.1	884.93	schlafen family member 12 [Source:HGNC Symbol;Acc:HGNC:25500]
ENSG00000112972	3389.44	-1.13856	0.11637	-9.78396	1.31946e-22	1.91273e-20	HMGCS1	3-hydroxy-3-methylglutaryl-CoA synthase 1 [Source:HGNC Symbol;Acc:HGNC:5007]	4398.2	2535.69	5283.13	1710.54	4498.4	1910.67	3-hydroxy-3-methylglutaryl-CoA synthase 1 [Source:HGNC Symbol;Acc:HGNC:5007]
ENSG00000157168	2881.83	0.872736	0.0897062	9.72883	2.272e-22	3.26306e-20	NRG1	neuregulin 1 [Source:HGNC Symbol;Acc:HGNC:7997]	2242.61	3409.65	1918.92	3769.8	1865.1	4084.89	neuregulin 1 [Source:HGNC Symbol;Acc:HGNC:7997]
ENSG00000030419	452.808	-1.12633	0.115801	-9.72644	2.326e-22	3.30996e-20	IKZF2	IKAROS family zinc finger 2 [Source:HGNC Symbol;Acc:HGNC:13177]	628.526	316.063	605.46	258.689	656.195	251.914	IKAROS family zinc finger 2 [Source:HGNC Symbol;Acc:HGNC:13177]
ENSG00000115594	8644.8	0.755892	0.0777359	9.72385	2.3858e-22	3.3642e-20	IL1R1	interleukin 1 receptor type 1 [Source:HGNC Symbol;Acc:HGNC:5993]	7001.56	10062.5	6196.2	11311.7	5937.41	11359.4	interleukin 1 receptor type 1 [Source:HGNC Symbol;Acc:HGNC:5993]
ENSG00000196684	291.763	-1.28467	0.132311	-9.70943	2.74868e-22	3.84097e-20	HSH2D	hematopoietic SH2 domain containing [Source:HGNC Symbol;Acc:HGNC:24920]	460.423	174.792	407.709	149.288	396.882	161.484	hematopoietic SH2 domain containing [Source:HGNC Symbol;Acc:HGNC:24920]
ENSG00000138760	17163.5	-0.615156	0.0634664	-9.69263	3.24085e-22	4.48829e-20	SCARB2	scavenger receptor class B member 2 [Source:HGNC Symbol;Acc:HGNC:1665]	20737.6	14293.5	20188.3	12648.4	21546.1	13567.2	scavenger receptor class B member 2 [Source:HGNC Symbol;Acc:HGNC:1665]
ENSG00000109323	2403.58	0.619156	0.064221	9.64102	5.36526e-22	7.36465e-20	MANBA	mannosidase beta [Source:HGNC Symbol;Acc:HGNC:6831]	1940.62	2921.19	1825.54	2894.58	1897.97	2941.59	mannosidase beta [Source:HGNC Symbol;Acc:HGNC:6831]
ENSG00000104312	2165.43	-0.759061	0.0787618	-9.63742	5.5565e-22	7.56026e-20	RIPK2	receptor interacting serine/threonine kinase 2 [Source:HGNC Symbol;Acc:HGNC:10020]	2889.73	1603.06	2482.87	1626.21	2836.61	1554.12	receptor interacting serine/threonine kinase 2 [Source:HGNC Symbol;Acc:HGNC:10020]
ENSG00000169105	678.85	1.01799	0.105712	9.62984	5.98207e-22	8.06851e-20	CHST14	carbohydrate sulfotransferase 14 [Source:HGNC Symbol;Acc:HGNC:24464]	447.035	791.354	433.954	976.637	435.84	988.28	carbohydrate sulfotransferase 14 [Source:HGNC Symbol;Acc:HGNC:24464]
ENSG00000114654	225.528	1.53794	0.160172	9.60182	7.85428e-22	1.05024e-19	EFCC1	EF-hand and coiled-coil domain containing 1 [Source:HGNC Symbol;Acc:HGNC:25692]	109.341	268.175	106.2	399.999	97.3944	372.058	EF-hand and coiled-coil domain containing 1 [Source:HGNC Symbol;Acc:HGNC:25692]
ENSG00000115884	525.125	1.19234	0.124459	9.58018	9.6877e-22	1.28432e-19	SDC1	syndecan 1 [Source:HGNC Symbol;Acc:HGNC:10658]	325.048	681.211	333.247	856.979	260.53	693.734	syndecan 1 [Source:HGNC Symbol;Acc:HGNC:10658]
ENSG00000115267	8034.91	-0.785716	0.0820367	-9.57761	9.93171e-22	1.3032e-19	IFIH1	interferon induced with helicase C domain 1 [Source:HGNC Symbol;Acc:HGNC:18873]	9826.58	6499.64	10122.5	5162.39	10726.8	5871.55	interferon induced with helicase C domain 1 [Source:HGNC Symbol;Acc:HGNC:18873]
ENSG00000107201	18579.2	-0.663599	0.0692915	-9.57692	9.99813e-22	1.3032e-19	DDX58	DExD/H-box helicase 58 [Source:HGNC Symbol;Acc:HGNC:19102]	22582.3	15434.4	22195.7	13148.7	23788.6	14325.5	DExD/H-box helicase 58 [Source:HGNC Symbol;Acc:HGNC:19102]
ENSG00000085449	3985.68	-0.869442	0.0910782	-9.54611	1.34662e-21	1.74062e-19	WDFY1	WD repeat and FYVE domain containing 1 [Source:HGNC Symbol;Acc:HGNC:20451]	4958.29	3000.2	5105.52	2357.83	5501.57	2990.68	WD repeat and FYVE domain containing 1 [Source:HGNC Symbol;Acc:HGNC:20451]
ENSG00000136928	275.071	1.69103	0.17717	9.54467	1.36545e-21	1.75038e-19	GABBR2	gamma-aminobutyric acid type B receptor subunit 2 [Source:HGNC Symbol;Acc:HGNC:4507]	122.73	295.71	118.407	527.635	93.7421	492.202	gamma-aminobutyric acid type B receptor subunit 2 [Source:HGNC Symbol;Acc:HGNC:4507]
ENSG00000138035	5380.92	-0.867417	0.0909302	-9.53938	1.43694e-21	1.82637e-19	PNPT1	polyribonucleotide nucleotidyltransferase 1 [Source:HGNC Symbol;Acc:HGNC:23166]	6768.74	4239.31	7060.45	3176.06	7173.1	3867.86	polyribonucleotide nucleotidyltransferase 1 [Source:HGNC Symbol;Acc:HGNC:23166]
ENSG00000161921	747.882	-0.990751	0.103868	-9.53856	1.44829e-21	1.82637e-19	CXCL16	C-X-C motif chemokine ligand 16 [Source:HGNC Symbol;Acc:HGNC:16642]	1015.31	498.038	903.918	451.281	1098.12	520.623	C-X-C motif chemokine ligand 16 [Source:HGNC Symbol;Acc:HGNC:16642]
ENSG00000152804	377.275	-1.27909	0.134502	-9.50984	1.90952e-21	2.3886e-19	HHEX	hematopoietically expressed homeobox [Source:HGNC Symbol;Acc:HGNC:4901]	509.515	213.103	645.132	210.826	479.667	205.407	hematopoietically expressed homeobox [Source:HGNC Symbol;Acc:HGNC:4901]
ENSG00000052802	3990.3	-0.952202	0.100502	-9.47448	2.68094e-21	3.32673e-19	MSMO1	methylsterol monooxygenase 1 [Source:HGNC Symbol;Acc:HGNC:10545]	4748.53	3081.61	5691.45	2292.87	5490.61	2636.7	methylsterol monooxygenase 1 [Source:HGNC Symbol;Acc:HGNC:10545]
ENSG00000162692	6921.66	-1.03915	0.109888	-9.45643	3.18636e-21	3.92251e-19	VCAM1	vascular cell adhesion molecule 1 [Source:HGNC Symbol;Acc:HGNC:12663]	9125.16	4860.66	8258.55	3638.74	10885	4761.83	vascular cell adhesion molecule 1 [Source:HGNC Symbol;Acc:HGNC:12663]
ENSG00000204138	3702.2	-0.883784	0.0935214	-9.45007	3.38591e-21	4.13535e-19	PHACTR4	phosphatase and actin regulator 4 [Source:HGNC Symbol;Acc:HGNC:25793]	4950.11	2903.23	4967.58	2167.52	4595.8	2628.95	phosphatase and actin regulator 4 [Source:HGNC Symbol;Acc:HGNC:25793]
ENSG00000069956	641.898	-1.09784	0.116383	-9.433	3.98531e-21	4.82939e-19	MAPK6	mitogen-activated protein kinase 6 [Source:HGNC Symbol;Acc:HGNC:6879]	859.11	446.559	841.053	328.205	961.77	414.69	mitogen-activated protein kinase 6 [Source:HGNC Symbol;Acc:HGNC:6879]
ENSG00000167535	1033.59	0.785109	0.0832383	9.43207	4.02081e-21	4.83464e-19	CACNB3	calcium voltage-gated channel auxiliary subunit beta 3 [Source:HGNC Symbol;Acc:HGNC:1403]	743.818	1246.29	787.953	1342.45	720.719	1360.34	calcium voltage-gated channel auxiliary subunit beta 3 [Source:HGNC Symbol;Acc:HGNC:1403]
ENSG00000197256	4176.06	0.619451	0.0658111	9.41256	4.8422e-21	5.77749e-19	KANK2	KN motif and ankyrin repeat domains 2 [Source:HGNC Symbol;Acc:HGNC:29300]	3410.41	4798.41	3274.49	5206.83	3147.06	5219.15	KN motif and ankyrin repeat domains 2 [Source:HGNC Symbol;Acc:HGNC:29300]
ENSG00000100346	186.244	-1.45203	0.154565	-9.39432	5.75887e-21	6.81877e-19	CACNA1I	calcium voltage-gated channel subunit alpha1 I [Source:HGNC Symbol;Acc:HGNC:1396]	296.783	86.199	266.72	84.3304	278.792	104.641	calcium voltage-gated channel subunit alpha1 I [Source:HGNC Symbol;Acc:HGNC:1396]
ENSG00000151617	510.412	1.12461	0.119833	9.38485	6.30036e-21	7.4034e-19	EDNRA	endothelin receptor type A [Source:HGNC Symbol;Acc:HGNC:3179]	317.61	590.223	300.289	761.253	314.097	778.997	endothelin receptor type A [Source:HGNC Symbol;Acc:HGNC:3179]
ENSG00000089057	1715.06	0.77919	0.0832942	9.35468	8.38553e-21	9.77954e-19	SLC23A2	solute carrier family 23 member 2 [Source:HGNC Symbol;Acc:HGNC:10973]	1360.44	2099.9	1248.76	2144.73	1138.3	2298.24	solute carrier family 23 member 2 [Source:HGNC Symbol;Acc:HGNC:10973]
ENSG00000155313	967.127	-0.881355	0.0942841	-9.34787	8.94318e-21	1.03521e-18	USP25	ubiquitin specific peptidase 25 [Source:HGNC Symbol;Acc:HGNC:12624]	1253.33	737.48	1245.1	589.173	1291.69	685.982	ubiquitin specific peptidase 25 [Source:HGNC Symbol;Acc:HGNC:12624]
ENSG00000118777	510.055	1.13564	0.121614	9.33812	9.80639e-21	1.12672e-18	ABCG2	ATP binding cassette subfamily G member 2 (Junior blood group) [Source:HGNC Symbol;Acc:HGNC:74]	300.502	688.395	335.078	825.07	287.314	623.973	ATP binding cassette subfamily G member 2 (Junior blood group) [Source:HGNC Symbol;Acc:HGNC:74]
ENSG00000130635	11433.4	0.594311	0.0638361	9.30996	1.27876e-20	1.45844e-18	COL5A1	collagen type V alpha 1 chain [Source:HGNC Symbol;Acc:HGNC:2209]	9536.49	13433.9	9241.2	13768.6	8440.44	14179.6	collagen type V alpha 1 chain [Source:HGNC Symbol;Acc:HGNC:2209]
ENSG00000130164	9936.68	-0.635716	0.068314	-9.3058	1.32985e-20	1.50564e-18	LDLR	low density lipoprotein receptor [Source:HGNC Symbol;Acc:HGNC:6547]	12713.3	8222.42	11803.4	7158.97	11869.9	7851.98	low density lipoprotein receptor [Source:HGNC Symbol;Acc:HGNC:6547]
ENSG00000038210	1245.8	-0.938596	0.100999	-9.29312	1.49832e-20	1.67198e-18	PI4K2B	phosphatidylinositol 4-kinase type 2 beta [Source:HGNC Symbol;Acc:HGNC:18215]	1555.32	909.878	1665.02	704.273	1737.27	903.017	phosphatidylinositol 4-kinase type 2 beta [Source:HGNC Symbol;Acc:HGNC:18215]
ENSG00000159307	84.8437	1.95869	0.210754	9.29375	1.48942e-20	1.67198e-18	SCUBE1	signal peptide, CUB domain and EGF like domain containing 1 [Source:HGNC Symbol;Acc:HGNC:13441]	23.8022	110.143	24.4137	147.008	28.0009	175.694	signal peptide, CUB domain and EGF like domain containing 1 [Source:HGNC Symbol;Acc:HGNC:13441]
ENSG00000117226	7720.08	-0.712351	0.0767223	-9.28479	1.62025e-20	1.78239e-18	GBP3	guanylate binding protein 3 [Source:HGNC Symbol;Acc:HGNC:4184]	9720.21	6467.32	9630.6	5233.04	9538.57	5730.73	guanylate binding protein 3 [Source:HGNC Symbol;Acc:HGNC:4184]
ENSG00000133818	1219.03	-0.80208	0.086386	-9.28484	1.61946e-20	1.78239e-18	RRAS2	related RAS viral (r-ras) oncogene homolog 2 [Source:HGNC Symbol;Acc:HGNC:17271]	1454.91	936.217	1552.71	860.398	1671.53	838.423	related RAS viral (r-ras) oncogene homolog 2 [Source:HGNC Symbol;Acc:HGNC:17271]
ENSG00000168394	16760.3	-0.516323	0.0558063	-9.25205	2.20233e-20	2.40566e-18	TAP1	transporter 1, ATP binding cassette subfamily B member [Source:HGNC Symbol;Acc:HGNC:43]	20328.5	13911.6	18884.6	13475.8	20077.9	13883.7	transporter 1, ATP binding cassette subfamily B member [Source:HGNC Symbol;Acc:HGNC:43]
ENSG00000183087	11218	-0.573327	0.0620802	-9.23527	2.57643e-20	2.79462e-18	GAS6	growth arrest specific 6 [Source:HGNC Symbol;Acc:HGNC:4168]	13924.3	8982.65	13249.9	9478.05	13177.5	8495.33	growth arrest specific 6 [Source:HGNC Symbol;Acc:HGNC:4168]
ENSG00000172345	227.953	-1.4001	0.15184	-9.2209	2.94626e-20	3.17358e-18	STARD5	StAR related lipid transfer domain containing 5 [Source:HGNC Symbol;Acc:HGNC:18065]	365.215	138.876	315.547	112.82	339.663	95.5983	StAR related lipid transfer domain containing 5 [Source:HGNC Symbol;Acc:HGNC:18065]
ENSG00000139921	4113.88	-0.745695	0.0809264	-9.21448	3.12794e-20	3.34603e-18	TMX1	thioredoxin related transmembrane protein 1 [Source:HGNC Symbol;Acc:HGNC:15487]	4966.47	3281.55	5033.5	2725.92	5541.74	3134.07	thioredoxin related transmembrane protein 1 [Source:HGNC Symbol;Acc:HGNC:15487]
ENSG00000103175	1032.42	0.74061	0.0809093	9.15357	5.508e-20	5.85169e-18	WFDC1	WAP four-disulfide core domain 1 [Source:HGNC Symbol;Acc:HGNC:15466]	804.067	1255.87	750.722	1328.77	743.85	1311.25	WAP four-disulfide core domain 1 [Source:HGNC Symbol;Acc:HGNC:15466]
ENSG00000160326	1129.19	-0.890558	0.0973085	-9.15191	5.59371e-20	5.90231e-18	SLC2A6	solute carrier family 2 member 6 [Source:HGNC Symbol;Acc:HGNC:11011]	1562.76	711.141	1386.7	885.469	1490.13	738.949	solute carrier family 2 member 6 [Source:HGNC Symbol;Acc:HGNC:11011]
ENSG00000083097	763.205	-1.04354	0.114139	-9.14269	6.09181e-20	6.38446e-18	DOPEY1	dopey family member 1 [Source:HGNC Symbol;Acc:HGNC:21194]	1028.7	557.899	994.249	396.581	1100.56	501.245	dopey family member 1 [Source:HGNC Symbol;Acc:HGNC:21194]
ENSG00000081087	977.371	-0.808388	0.0884492	-9.13958	6.26967e-20	6.52676e-18	OSTM1	osteopetrosis associated transmembrane protein 1 [Source:HGNC Symbol;Acc:HGNC:21652]	1168.54	666.845	1323.22	732.763	1264.91	707.944	osteopetrosis associated transmembrane protein 1 [Source:HGNC Symbol;Acc:HGNC:21652]
ENSG00000133313	2473.76	-0.615971	0.0674488	-9.13242	6.69861e-20	6.92681e-18	CNDP2	CNDP dipeptidase 2 (metallopeptidase M20 family) [Source:HGNC Symbol;Acc:HGNC:24437]	3072.71	1920.32	2850.91	1928.2	3087.4	1983.02	CNDP dipeptidase 2 (metallopeptidase M20 family) [Source:HGNC Symbol;Acc:HGNC:24437]
ENSG00000099194	10978.8	-0.909953	0.09965	-9.13149	6.75633e-20	6.94023e-18	SCD	stearoyl-CoA desaturase [Source:HGNC Symbol;Acc:HGNC:10571]	13539.7	8733.63	15409.9	6222.21	14424.1	7543.22	stearoyl-CoA desaturase [Source:HGNC Symbol;Acc:HGNC:10571]
ENSG00000121440	2033.22	0.748708	0.0820794	9.12176	7.39163e-20	7.54286e-18	PDZRN3	PDZ domain containing ring finger 3 [Source:HGNC Symbol;Acc:HGNC:17704]	1598.46	2442.3	1466.65	2433.05	1443.87	2814.98	PDZ domain containing ring finger 3 [Source:HGNC Symbol;Acc:HGNC:17704]
ENSG00000010030	547.958	-1.10863	0.121771	-9.10423	8.68816e-20	8.80797e-18	ETV7	ETS variant 7 [Source:HGNC Symbol;Acc:HGNC:18160]	763.901	380.712	753.773	265.527	762.111	361.723	ETS variant 7 [Source:HGNC Symbol;Acc:HGNC:18160]
ENSG00000113552	779.13	0.83825	0.0921171	9.09984	9.04672e-20	9.11193e-18	GNPDA1	glucosamine-6-phosphate deaminase 1 [Source:HGNC Symbol;Acc:HGNC:4417]	533.317	985.302	580.436	1079.2	540.539	955.983	glucosamine-6-phosphate deaminase 1 [Source:HGNC Symbol;Acc:HGNC:4417]
ENSG00000119922	110076	-0.927839	0.102092	-9.08825	1.00645e-19	1.00716e-17	IFIT2	interferon induced protein with tetratricopeptide repeats 2 [Source:HGNC Symbol;Acc:HGNC:5409]	147025	87197.4	140868	59679.7	149114	76567.8	interferon induced protein with tetratricopeptide repeats 2 [Source:HGNC Symbol;Acc:HGNC:5409]
ENSG00000059378	3808.23	-0.667055	0.0735147	-9.07376	1.14982e-19	1.14326e-17	PARP12	poly(ADP-ribose) polymerase family member 12 [Source:HGNC Symbol;Acc:HGNC:21919]	4779.77	3095.98	4547.67	2648.43	4745.54	3032.02	poly(ADP-ribose) polymerase family member 12 [Source:HGNC Symbol;Acc:HGNC:21919]
ENSG00000118523	7002.88	-0.824822	0.0912392	-9.04021	1.56368e-19	1.54486e-17	CTGF	connective tissue growth factor [Source:HGNC Symbol;Acc:HGNC:2500]	9457.65	5503.56	8025.4	5088.31	9562.91	4379.44	connective tissue growth factor [Source:HGNC Symbol;Acc:HGNC:2500]
ENSG00000135318	19023.1	-0.576529	0.0638833	-9.02472	1.80152e-19	1.76856e-17	NT5E	5'-nucleotidase ecto [Source:HGNC Symbol;Acc:HGNC:8021]	23047.2	15416.4	23598.9	15992	21850.4	14233.8	5'-nucleotidase ecto [Source:HGNC Symbol;Acc:HGNC:8021]
ENSG00000153071	12292.5	-0.714851	0.0795655	-8.98444	2.60061e-19	2.53699e-17	DAB2	DAB2, clathrin adaptor protein [Source:HGNC Symbol;Acc:HGNC:2662]	14796	10133.2	15552.8	8104.83	15698.8	9469.4	DAB2, clathrin adaptor protein [Source:HGNC Symbol;Acc:HGNC:2662]
ENSG00000117143	1173.03	-0.736265	0.0819654	-8.98263	2.64368e-19	2.56289e-17	UAP1	UDP-N-acetylglucosamine pyrophosphorylase 1 [Source:HGNC Symbol;Acc:HGNC:12457]	1495.82	879.948	1499	926.495	1425.61	811.294	UDP-N-acetylglucosamine pyrophosphorylase 1 [Source:HGNC Symbol;Acc:HGNC:12457]
ENSG00000067064	1731.63	-0.776661	0.0866129	-8.96704	3.04593e-19	2.9345e-17	IDI1	isopentenyl-diphosphate delta isomerase 1 [Source:HGNC Symbol;Acc:HGNC:5387]	2047.73	1392.35	2332.12	1176.07	2219.38	1222.11	isopentenyl-diphosphate delta isomerase 1 [Source:HGNC Symbol;Acc:HGNC:5387]
ENSG00000172936	4959.17	-0.649062	0.0724584	-8.95772	3.31468e-19	3.15424e-17	MYD88	myeloid differentiation primary response 88 [Source:HGNC Symbol;Acc:HGNC:7562]	6247.33	4108.82	5955.12	3481.48	6031.15	3931.16	myeloid differentiation primary response 88 [Source:HGNC Symbol;Acc:HGNC:7562]
ENSG00000019991	13842.7	0.61075	0.06818	8.9579	3.30916e-19	3.15424e-17	HGF	hepatocyte growth factor [Source:HGNC Symbol;Acc:HGNC:4893]	10489.3	17056.6	11935.9	16586.9	10281.2	16706.5	hepatocyte growth factor [Source:HGNC Symbol;Acc:HGNC:4893]
ENSG00000138600	2151.94	-0.686521	0.0766472	-8.95689	3.33963e-19	3.15859e-17	SPPL2A	signal peptide peptidase like 2A [Source:HGNC Symbol;Acc:HGNC:30227]	2537.91	1733.56	2671.47	1515.67	2789.13	1663.93	signal peptide peptidase like 2A [Source:HGNC Symbol;Acc:HGNC:30227]
ENSG00000116741	1771.73	0.94685	0.105856	8.94468	3.73031e-19	3.50672e-17	RGS2	regulator of G-protein signaling 2 [Source:HGNC Symbol;Acc:HGNC:9998]	1379.78	2099.9	1108.38	2613.1	1067.69	2361.54	regulator of G-protein signaling 2 [Source:HGNC Symbol;Acc:HGNC:9998]
ENSG00000067798	2597.49	-0.765791	0.0857508	-8.93043	4.24371e-19	3.96531e-17	NAV3	neuron navigator 3 [Source:HGNC Symbol;Acc:HGNC:15998]	3371.73	2147.79	3288.53	1878.06	3210.36	1688.47	neuron navigator 3 [Source:HGNC Symbol;Acc:HGNC:15998]
ENSG00000258521	206.511	-1.6148	0.180868	-8.92804	4.33604e-19	4.02733e-17	RP11-638I2.9		418.026	106.551	286.251	74.074	271.487	82.6796
ENSG00000204267	2565.85	-0.610164	0.0683578	-8.92604	4.41526e-19	4.07649e-17	TAP2	transporter 2, ATP binding cassette subfamily B member [Source:HGNC Symbol;Acc:HGNC:44]	3159.74	2154.97	3085.28	1955.55	3084.97	1954.6	transporter 2, ATP binding cassette subfamily B member [Source:HGNC Symbol;Acc:HGNC:44]
ENSG00000110848	315.134	-1.13494	0.127255	-8.91858	4.72308e-19	4.33489e-17	CD69	CD69 molecule [Source:HGNC Symbol;Acc:HGNC:1694]	431.414	191.553	466.302	169.8	422.448	209.283	CD69 molecule [Source:HGNC Symbol;Acc:HGNC:1694]
ENSG00000113504	875	-0.936916	0.105178	-8.9079	5.20101e-19	4.71771e-17	SLC12A7	solute carrier family 12 member 7 [Source:HGNC Symbol;Acc:HGNC:10915]	1209.45	521.983	1064.44	570.939	1210.13	673.064	solute carrier family 12 member 7 [Source:HGNC Symbol;Acc:HGNC:10915]
ENSG00000183160	4722.8	0.80497	0.0903613	8.90835	5.17955e-19	4.71771e-17	TMEM119	transmembrane protein 119 [Source:HGNC Symbol;Acc:HGNC:27884]	3610.49	5604.13	3657.17	6504.84	2919.4	6040.78	transmembrane protein 119 [Source:HGNC Symbol;Acc:HGNC:27884]
ENSG00000068079	5958.5	-0.544918	0.0612279	-8.89984	5.59253e-19	5.04335e-17	IFI35	interferon induced protein 35 [Source:HGNC Symbol;Acc:HGNC:5399]	7332.56	4824.75	6686.92	4806.83	7242.49	4857.43	interferon induced protein 35 [Source:HGNC Symbol;Acc:HGNC:5399]
ENSG00000173221	4421.94	-0.620296	0.0697161	-8.89746	5.71397e-19	5.12308e-17	GLRX	glutaredoxin [Source:HGNC Symbol;Acc:HGNC:4330]	5253.59	3632.33	5115.28	3343.59	5762.1	3424.75	glutaredoxin [Source:HGNC Symbol;Acc:HGNC:4330]
ENSG00000164692	138174	0.527983	0.0595293	8.8693	7.36054e-19	6.56146e-17	COL1A2	collagen type I alpha 2 chain [Source:HGNC Symbol;Acc:HGNC:2198]	114431	160607	113323	155647	110736	174303	collagen type I alpha 2 chain [Source:HGNC Symbol;Acc:HGNC:2198]
ENSG00000110330	3125.83	-0.634478	0.0715563	-8.86683	7.52601e-19	6.67063e-17	BIRC2	baculoviral IAP repeat containing 2 [Source:HGNC Symbol;Acc:HGNC:590]	3817.27	2602.73	3761.54	2238.17	3867.78	2467.47	baculoviral IAP repeat containing 2 [Source:HGNC Symbol;Acc:HGNC:590]
ENSG00000100360	482.357	0.889322	0.100308	8.86588	7.59016e-19	6.68926e-17	IFT27	intraflagellar transport 27 [Source:HGNC Symbol;Acc:HGNC:18626]	336.95	634.52	338.13	621.082	321.402	642.059	intraflagellar transport 27 [Source:HGNC Symbol;Acc:HGNC:18626]
ENSG00000174032	922.741	-0.849062	0.0957936	-8.86346	7.75697e-19	6.79765e-17	SLC25A30	solute carrier family 25 member 30 [Source:HGNC Symbol;Acc:HGNC:27371]	1103.83	711.141	1228.62	598.29	1256.39	638.183	solute carrier family 25 member 30 [Source:HGNC Symbol;Acc:HGNC:27371]
ENSG00000155287	2352.51	-0.64632	0.0730445	-8.8483	8.88597e-19	7.74327e-17	SLC25A28	solute carrier family 25 member 28 [Source:HGNC Symbol;Acc:HGNC:23472]	3036.26	1895.18	2728.84	1733.33	2879.22	1842.21	solute carrier family 25 member 28 [Source:HGNC Symbol;Acc:HGNC:23472]
ENSG00000135074	706.089	0.826996	0.0938184	8.81486	1.19834e-18	1.03841e-16	ADAM19	ADAM metallopeptidase domain 19 [Source:HGNC Symbol;Acc:HGNC:197]	527.367	925.442	461.419	905.982	521.06	895.265	ADAM metallopeptidase domain 19 [Source:HGNC Symbol;Acc:HGNC:197]
ENSG00000149257	10595.2	0.569608	0.0646307	8.81328	1.21541e-18	1.04735e-16	SERPINH1	serpin family H member 1 [Source:HGNC Symbol;Acc:HGNC:1546]	8685.56	11891.9	8553.96	13541.9	8250.52	12647.4	serpin family H member 1 [Source:HGNC Symbol;Acc:HGNC:1546]
ENSG00000107984	1809.21	-0.836976	0.095631	-8.75214	2.09345e-18	1.794e-16	DKK1	dickkopf WNT signaling pathway inhibitor 1 [Source:HGNC Symbol;Acc:HGNC:2891]	2216.58	1218.76	2538.42	1464.39	2258.33	1158.81	dickkopf WNT signaling pathway inhibitor 1 [Source:HGNC Symbol;Acc:HGNC:2891]
ENSG00000160712	607.738	0.814006	0.0930331	8.74964	2.14038e-18	1.82414e-16	IL6R	interleukin 6 receptor [Source:HGNC Symbol;Acc:HGNC:6019]	432.902	766.213	448.602	801.139	422.448	775.121	interleukin 6 receptor [Source:HGNC Symbol;Acc:HGNC:6019]
ENSG00000124226	4356.75	-0.608992	0.0696277	-8.74641	2.20257e-18	1.86689e-16	RNF114	ring finger protein 114 [Source:HGNC Symbol;Acc:HGNC:13094]	5320.53	3492.26	4941.95	3262.67	5579.48	3543.6	ring finger protein 114 [Source:HGNC Symbol;Acc:HGNC:13094]
ENSG00000167460	9659.75	0.506727	0.0579589	8.74286	2.2728e-18	1.91595e-16	TPM4	tropomyosin 4 [Source:HGNC Symbol;Acc:HGNC:12013]	7824.22	11250.2	7880.14	10961.8	8175.04	11867.1	tropomyosin 4 [Source:HGNC Symbol;Acc:HGNC:12013]
ENSG00000179021	1199.26	-0.875615	0.100191	-8.73947	2.34207e-18	1.96366e-16	C3orf38	chromosome 3 open reading frame 38 [Source:HGNC Symbol;Acc:HGNC:28384]	1467.55	920.653	1526.47	721.367	1705.62	853.925	chromosome 3 open reading frame 38 [Source:HGNC Symbol;Acc:HGNC:28384]
ENSG00000096696	284.049	-1.22755	0.140822	-8.71704	2.8556e-18	2.38136e-16	DSP	desmoplakin [Source:HGNC Symbol;Acc:HGNC:3052]	405.381	164.017	402.216	128.775	412.709	191.197	desmoplakin [Source:HGNC Symbol;Acc:HGNC:3052]
ENSG00000099875	1356.27	0.743145	0.0853568	8.70634	3.13853e-18	2.6033e-16	MKNK2	MAP kinase interacting serine/threonine kinase 2 [Source:HGNC Symbol;Acc:HGNC:7111]	1016.06	1537.21	1030.87	1803.99	965.422	1784.07	MAP kinase interacting serine/threonine kinase 2 [Source:HGNC Symbol;Acc:HGNC:7111]
ENSG00000204160	599.007	0.935879	0.107781	8.68313	3.85011e-18	3.17655e-16	ZDHHC18	zinc finger DHHC-type containing 18 [Source:HGNC Symbol;Acc:HGNC:20712]	429.183	725.508	394.892	892.307	383.491	768.662	zinc finger DHHC-type containing 18 [Source:HGNC Symbol;Acc:HGNC:20712]
ENSG00000196116	2671.66	-0.694845	0.0802945	-8.6537	4.9857e-18	4.0917e-16	TDRD7	tudor domain containing 7 [Source:HGNC Symbol;Acc:HGNC:30831]	3228.17	2169.34	3276.32	1802.85	3451.41	2101.87	tudor domain containing 7 [Source:HGNC Symbol;Acc:HGNC:30831]
ENSG00000169439	914.438	0.742043	0.0859207	8.63636	5.80302e-18	4.73741e-16	SDC2	syndecan 2 [Source:HGNC Symbol;Acc:HGNC:10659]	656.791	1087.06	674.429	1146.44	703.675	1218.23	syndecan 2 [Source:HGNC Symbol;Acc:HGNC:10659]
ENSG00000025708	2532.98	-0.65837	0.0763534	-8.62268	6.54064e-18	5.31162e-16	TYMP	thymidine phosphorylase [Source:HGNC Symbol;Acc:HGNC:3148]	3335.28	1922.72	3148.15	1911.11	2853.66	2026.94	thymidine phosphorylase [Source:HGNC Symbol;Acc:HGNC:3148]
ENSG00000108828	8619.11	0.624015	0.0724248	8.61603	6.93151e-18	5.59972e-16	VAT1	vesicle amine transport 1 [Source:HGNC Symbol;Acc:HGNC:16919]	6961.39	10233.7	7126.36	11107.7	6145.59	10139.9	vesicle amine transport 1 [Source:HGNC Symbol;Acc:HGNC:16919]
ENSG00000163661	6791.11	-0.700023	0.0814769	-8.59168	8.57049e-18	6.88792e-16	PTX3	pentraxin 3 [Source:HGNC Symbol;Acc:HGNC:9692]	9235.99	5589.76	7911.26	5116.8	8198.17	4694.65	pentraxin 3 [Source:HGNC Symbol;Acc:HGNC:9692]
ENSG00000124256	88.092	-1.75588	0.204694	-8.5781	9.64511e-18	7.71162e-16	ZBP1	Z-DNA binding protein 1 [Source:HGNC Symbol;Acc:HGNC:16176]	154.714	40.7051	147.093	26.2108	132.7	27.1293	Z-DNA binding protein 1 [Source:HGNC Symbol;Acc:HGNC:16176]
ENSG00000152952	4221.39	-0.563294	0.0657407	-8.56842	1.04913e-17	8.34519e-16	PLOD2	procollagen-lysine,2-oxoglutarate 5-dioxygenase 2 [Source:HGNC Symbol;Acc:HGNC:9082]	5084	3537.75	5095.14	3488.31	4967.12	3156.04	procollagen-lysine,2-oxoglutarate 5-dioxygenase 2 [Source:HGNC Symbol;Acc:HGNC:9082]
ENSG00000138162	832.654	0.919476	0.107455	8.55684	1.15999e-17	9.17593e-16	TACC2	transforming acidic coiled-coil containing protein 2 [Source:HGNC Symbol;Acc:HGNC:11523]	609.931	970.936	581.657	1210.25	497.929	1125.22	transforming acidic coiled-coil containing protein 2 [Source:HGNC Symbol;Acc:HGNC:11523]
ENSG00000140464	9391.64	-0.650346	0.0760078	-8.55631	1.1654e-17	9.17593e-16	PML	promyelocytic leukemia [Source:HGNC Symbol;Acc:HGNC:9113]	12484.2	7495.72	11649	6836.46	10420	7464.42	promyelocytic leukemia [Source:HGNC Symbol;Acc:HGNC:9113]
ENSG00000146072	1438.68	0.917446	0.107247	8.55449	1.18393e-17	9.27476e-16	TNFRSF21	TNF receptor superfamily member 21 [Source:HGNC Symbol;Acc:HGNC:13469]	1031.68	1592.29	1011.34	2159.54	882.637	1954.6	TNF receptor superfamily member 21 [Source:HGNC Symbol;Acc:HGNC:13469]
ENSG00000102287	435.215	-1.0915	0.127737	-8.54491	1.28633e-17	1.00263e-15	GABRE	gamma-aminobutyric acid type A receptor epsilon subunit [Source:HGNC Symbol;Acc:HGNC:4085]	629.27	280.147	606.681	215.384	569.757	310.049	gamma-aminobutyric acid type A receptor epsilon subunit [Source:HGNC Symbol;Acc:HGNC:4085]
ENSG00000070961	5334.59	-0.619658	0.0726077	-8.53434	1.40962e-17	1.09323e-15	ATP2B1	ATPase plasma membrane Ca2+ transporting 1 [Source:HGNC Symbol;Acc:HGNC:814]	6413.94	4507.49	6820.58	4176.63	6221.07	3867.86	ATPase plasma membrane Ca2+ transporting 1 [Source:HGNC Symbol;Acc:HGNC:814]
ENSG00000164430	468.883	-0.931152	0.109581	-8.49736	1.93946e-17	1.49666e-15	MB21D1	Mab-21 domain containing 1 [Source:HGNC Symbol;Acc:HGNC:21367]	659.767	341.204	616.446	313.39	589.236	293.254	Mab-21 domain containing 1 [Source:HGNC Symbol;Acc:HGNC:21367]
ENSG00000133401	761.206	-1.09847	0.129363	-8.49135	2.0425e-17	1.56838e-15	PDZD2	PDZ domain containing 2 [Source:HGNC Symbol;Acc:HGNC:18486]	1077.05	532.757	985.093	347.578	1105.43	519.331	PDZ domain containing 2 [Source:HGNC Symbol;Acc:HGNC:18486]
ENSG00000183726	4613.53	-0.536648	0.0632572	-8.48359	2.18344e-17	1.66016e-15	TMEM50A	transmembrane protein 50A [Source:HGNC Symbol;Acc:HGNC:30590]	5348.79	3725.71	5276.41	3719.65	5803.49	3807.14	transmembrane protein 50A [Source:HGNC Symbol;Acc:HGNC:30590]
ENSG00000147872	1279.65	0.796308	0.0938637	8.48367	2.18205e-17	1.66016e-15	PLIN2	perilipin 2 [Source:HGNC Symbol;Acc:HGNC:248]	969.195	1500.1	881.946	1849.57	920.377	1556.7	perilipin 2 [Source:HGNC Symbol;Acc:HGNC:248]
ENSG00000113161	2975.7	-0.746071	0.0880984	-8.46861	2.48346e-17	1.87907e-15	HMGCR	3-hydroxy-3-methylglutaryl-CoA reductase [Source:HGNC Symbol;Acc:HGNC:5006]	3480.32	2439.91	4083.19	1995.44	3687.6	2167.76	3-hydroxy-3-methylglutaryl-CoA reductase [Source:HGNC Symbol;Acc:HGNC:5006]
ENSG00000013374	3120.63	-0.706853	0.0835616	-8.45907	2.69522e-17	2.02939e-15	NUB1	negative regulator of ubiquitin like proteins 1 [Source:HGNC Symbol;Acc:HGNC:17623]	3948.93	2526.11	3701.12	2061.54	4021.17	2464.89	negative regulator of ubiquitin like proteins 1 [Source:HGNC Symbol;Acc:HGNC:17623]
ENSG00000072952	1268.39	0.658511	0.0781023	8.4314	3.41562e-17	2.5594e-15	MRVI1	murine retrovirus integration site 1 homolog [Source:HGNC Symbol;Acc:HGNC:7237]	964.732	1563.55	997.3	1472.36	967.857	1644.55	murine retrovirus integration site 1 homolog [Source:HGNC Symbol;Acc:HGNC:7237]
ENSG00000139329	3993.27	-0.969889	0.115288	-8.41272	4.00621e-17	2.98752e-15	LUM	lumican [Source:HGNC Symbol;Acc:HGNC:6724]	4629.52	2727.24	4710.02	2452.42	6727.52	2712.93	lumican [Source:HGNC Symbol;Acc:HGNC:6724]
ENSG00000149131	2206.95	-0.866455	0.103103	-8.40375	4.32433e-17	3.20932e-15	SERPING1	serpin family G member 1 [Source:HGNC Symbol;Acc:HGNC:1228]	2815.35	1507.28	2595.79	1342.45	3221.32	1759.53	serpin family G member 1 [Source:HGNC Symbol;Acc:HGNC:1228]
ENSG00000172893	1517.63	-0.683246	0.0814736	-8.38611	5.02513e-17	3.71166e-15	DHCR7	7-dehydrocholesterol reductase [Source:HGNC Symbol;Acc:HGNC:2860]	1875.17	1235.52	1986.06	1147.58	1775.01	1086.46	7-dehydrocholesterol reductase [Source:HGNC Symbol;Acc:HGNC:2860]
ENSG00000113578	328.539	-1.06466	0.126981	-8.38439	5.09895e-17	3.74833e-15	FGF1	fibroblast growth factor 1 [Source:HGNC Symbol;Acc:HGNC:3665]	465.63	237.047	454.095	192.592	435.84	186.029	fibroblast growth factor 1 [Source:HGNC Symbol;Acc:HGNC:3665]
ENSG00000185745	47197.8	-0.714267	0.0852993	-8.37366	5.58569e-17	4.08677e-15	IFIT1	interferon induced protein with tetratricopeptide repeats 1 [Source:HGNC Symbol;Acc:HGNC:5407]	56442.4	39352.2	56479.9	31102	63988.1	35822.2	interferon induced protein with tetratricopeptide repeats 1 [Source:HGNC Symbol;Acc:HGNC:5407]
ENSG00000151414	1667.68	-0.666228	0.0797769	-8.35114	6.76076e-17	4.92329e-15	NEK7	NIMA related kinase 7 [Source:HGNC Symbol;Acc:HGNC:13386]	1952.52	1366.01	2146.58	1190.88	2065.98	1284.12	NIMA related kinase 7 [Source:HGNC Symbol;Acc:HGNC:13386]
ENSG00000185215	11863.2	-0.692477	0.0830536	-8.33771	7.57428e-17	5.48993e-15	TNFAIP2	TNF alpha induced protein 2 [Source:HGNC Symbol;Acc:HGNC:11895]	16327.5	9390.9	13378.7	8193.72	14486.2	9402.22	TNF alpha induced protein 2 [Source:HGNC Symbol;Acc:HGNC:11895]
ENSG00000105971	4119.88	-0.52435	0.0629436	-8.33047	8.0519e-17	5.80898e-15	CAV2	caveolin 2 [Source:HGNC Symbol;Acc:HGNC:1528]	4674.15	3419.23	5034.11	3440.45	4907.46	3243.88	caveolin 2 [Source:HGNC Symbol;Acc:HGNC:1528]
ENSG00000008517	816.126	-0.899888	0.108092	-8.32521	8.41828e-17	6.04518e-15	IL32	interleukin 32 [Source:HGNC Symbol;Acc:HGNC:16830]	1170.77	533.955	916.125	584.615	1137.08	554.212	interleukin 32 [Source:HGNC Symbol;Acc:HGNC:16830]
ENSG00000185585	894.326	0.767947	0.0922607	8.32366	8.52906e-17	6.09651e-15	OLFML2A	olfactomedin like 2A [Source:HGNC Symbol;Acc:HGNC:27270]	635.964	1137.35	672.598	1032.48	652.543	1235.03	olfactomedin like 2A [Source:HGNC Symbol;Acc:HGNC:27270]
ENSG00000090975	786.545	0.744428	0.0895353	8.31435	9.22563e-17	6.56416e-15	PITPNM2	phosphatidylinositol transfer protein membrane associated 2 [Source:HGNC Symbol;Acc:HGNC:21044]	618.113	1011.64	567.009	947.007	558.8	1016.7	phosphatidylinositol transfer protein membrane associated 2 [Source:HGNC Symbol;Acc:HGNC:21044]
ENSG00000076641	1319.01	0.70212	0.0845932	8.29996	1.04147e-16	7.3764e-15	PAG1	phosphoprotein membrane anchor with glycosphingolipid microdomains 1 [Source:HGNC Symbol;Acc:HGNC:30043]	1025.72	1615.03	1061.39	1695.72	893.594	1622.59	phosphoprotein membrane anchor with glycosphingolipid microdomains 1 [Source:HGNC Symbol;Acc:HGNC:30043]
ENSG00000146006	464.497	-1.0732	0.129327	-8.2983	1.05615e-16	7.44631e-15	LRRTM2	leucine rich repeat transmembrane neuronal 2 [Source:HGNC Symbol;Acc:HGNC:19409]	700.676	340.007	664.663	265.527	555.148	260.958	leucine rich repeat transmembrane neuronal 2 [Source:HGNC Symbol;Acc:HGNC:19409]
ENSG00000134371	1613.79	-0.680379	0.082168	-8.28035	1.22819e-16	8.62009e-15	CDC73	cell division cycle 73 [Source:HGNC Symbol;Acc:HGNC:16783]	1893.76	1345.66	2034.27	1182.9	2064.76	1161.39	cell division cycle 73 [Source:HGNC Symbol;Acc:HGNC:16783]
ENSG00000111913	224.184	-1.38148	0.166918	-8.27641	1.2694e-16	8.8692e-15	FAM65B	family with sequence similarity 65 member B [Source:HGNC Symbol;Acc:HGNC:13872]	339.925	112.538	272.823	92.3076	394.447	133.063	family with sequence similarity 65 member B [Source:HGNC Symbol;Acc:HGNC:13872]
ENSG00000108771	2767.56	-0.578115	0.0699995	-8.25885	1.47086e-16	1.02307e-14	DHX58	DExH-box helicase 58 [Source:HGNC Symbol;Acc:HGNC:29517]	3405.2	2214.83	3200.03	2079.77	3369.85	2335.7	DExH-box helicase 58 [Source:HGNC Symbol;Acc:HGNC:29517]
ENSG00000165997	2451.01	-0.849515	0.10288	-8.2573	1.49003e-16	1.03178e-14	ARL5B	ADP ribosylation factor like GTPase 5B [Source:HGNC Symbol;Acc:HGNC:23052]	3478.84	2040.04	3073.08	1533.9	2991.23	1589	ADP ribosylation factor like GTPase 5B [Source:HGNC Symbol;Acc:HGNC:23052]
ENSG00000225511	615.118	0.795179	0.0963985	8.24887	1.59902e-16	1.10233e-14	LINC00475	long intergenic non-protein coding RNA 475 [Source:HGNC Symbol;Acc:HGNC:23569]	440.34	821.285	470.574	765.811	417.579	775.121	long intergenic non-protein coding RNA 475 [Source:HGNC Symbol;Acc:HGNC:23569]
ENSG00000115415	45324	-0.592291	0.071809	-8.24814	1.60878e-16	1.10415e-14	STAT1	signal transducer and activator of transcription 1 [Source:HGNC Symbol;Acc:HGNC:11362]	54904.2	38972.7	54181.4	32199.4	54956	36730.4	signal transducer and activator of transcription 1 [Source:HGNC Symbol;Acc:HGNC:11362]
ENSG00000116133	3114.3	-0.716185	0.0869478	-8.23695	1.76652e-16	1.20707e-14	DHCR24	24-dehydrocholesterol reductase [Source:HGNC Symbol;Acc:HGNC:2859]	3764.46	2653.01	4140.57	2144.73	3775.25	2207.8	24-dehydrocholesterol reductase [Source:HGNC Symbol;Acc:HGNC:2859]
ENSG00000136169	2290.89	-0.691377	0.0839981	-8.23086	1.85867e-16	1.26446e-14	SETDB2	SET domain bifurcated 2 [Source:HGNC Symbol;Acc:HGNC:20263]	2731.3	1914.34	2842.37	1549.86	2959.57	1747.9	SET domain bifurcated 2 [Source:HGNC Symbol;Acc:HGNC:20263]
ENSG00000169255	237.955	-1.13737	0.138193	-8.23032	1.8671e-16	1.26465e-14	B3GALNT1	beta-1,3-N-acetylgalactosaminyltransferase 1 (globoside blood group) [Source:HGNC Symbol;Acc:HGNC:918]	336.206	154.44	328.364	124.216	337.228	147.273	beta-1,3-N-acetylgalactosaminyltransferase 1 (globoside blood group) [Source:HGNC Symbol;Acc:HGNC:918]
ENSG00000113460	765.872	-0.990045	0.120511	-8.21542	2.11421e-16	1.42581e-14	BRIX1	BRX1, biogenesis of ribosomes [Source:HGNC Symbol;Acc:HGNC:24170]	844.977	508.813	1044.91	505.982	1212.56	477.992	BRX1, biogenesis of ribosomes [Source:HGNC Symbol;Acc:HGNC:24170]
ENSG00000151883	607.872	-0.906922	0.110548	-8.2039	2.32712e-16	1.5626e-14	PARP8	poly(ADP-ribose) polymerase family member 8 [Source:HGNC Symbol;Acc:HGNC:26124]	827.869	456.136	739.125	358.974	838.809	426.317	poly(ADP-ribose) polymerase family member 8 [Source:HGNC Symbol;Acc:HGNC:26124]
ENSG00000151632	203.743	1.29824	0.158296	8.20137	2.37653e-16	1.5889e-14	AKR1C2	aldo-keto reductase family 1 member C2 [Source:HGNC Symbol;Acc:HGNC:385]	121.986	252.611	106.2	292.877	97.3944	351.388	aldo-keto reductase family 1 member C2 [Source:HGNC Symbol;Acc:HGNC:385]
ENSG00000174348	1166.51	-0.633333	0.0774872	-8.17339	2.99849e-16	1.99612e-14	PODN	podocan [Source:HGNC Symbol;Acc:HGNC:23174]	1414	954.175	1440.41	882.05	1418.31	890.098	podocan [Source:HGNC Symbol;Acc:HGNC:23174]
ENSG00000152689	444.647	-0.908699	0.111245	-8.16847	3.12337e-16	2.07037e-14	RASGRP3	RAS guanyl releasing protein 3 [Source:HGNC Symbol;Acc:HGNC:14545]	609.931	310.077	549.309	278.062	601.411	319.092	RAS guanyl releasing protein 3 [Source:HGNC Symbol;Acc:HGNC:14545]
ENSG00000145780	1171.83	-0.682406	0.0837018	-8.15282	3.55531e-16	2.34665e-14	FEM1C	fem-1 homolog C [Source:HGNC Symbol;Acc:HGNC:16933]	1437.06	963.752	1435.53	821.651	1481.61	891.39	fem-1 homolog C [Source:HGNC Symbol;Acc:HGNC:16933]
ENSG00000188313	5616.35	-0.527007	0.0647007	-8.14529	3.78363e-16	2.48677e-14	PLSCR1	phospholipid scramblase 1 [Source:HGNC Symbol;Acc:HGNC:9092]	6483.86	4762.49	6674.1	4272.36	6783.52	4721.78	phospholipid scramblase 1 [Source:HGNC Symbol;Acc:HGNC:9092]
ENSG00000103034	426.313	0.891452	0.10956	8.13668	4.06255e-16	2.64765e-14	NDRG4	NDRG family member 4 [Source:HGNC Symbol;Acc:HGNC:14466]	310.172	541.138	297.237	554.985	267.835	586.509	NDRG family member 4 [Source:HGNC Symbol;Acc:HGNC:14466]
ENSG00000136492	1659.25	-0.897448	0.110295	-8.1368	4.05865e-16	2.64765e-14	BRIP1	BRCA1 interacting protein C-terminal helicase 1 [Source:HGNC Symbol;Acc:HGNC:20473]	2105.75	1333.69	2094.7	921.936	2349.64	1149.76	BRCA1 interacting protein C-terminal helicase 1 [Source:HGNC Symbol;Acc:HGNC:20473]
ENSG00000091136	20438.6	0.512197	0.062957	8.13565	4.09727e-16	2.65911e-14	LAMB1	laminin subunit beta 1 [Source:HGNC Symbol;Acc:HGNC:6486]	17147.2	24545.2	17085.3	22491.1	16143.1	25219.9	laminin subunit beta 1 [Source:HGNC Symbol;Acc:HGNC:6486]
ENSG00000151320	275.097	1.08151	0.132988	8.13241	4.20823e-16	2.71974e-14	AKAP6	A-kinase anchoring protein 6 [Source:HGNC Symbol;Acc:HGNC:376]	157.689	417.826	183.713	378.347	166.788	346.221	A-kinase anchoring protein 6 [Source:HGNC Symbol;Acc:HGNC:376]
ENSG00000100739	5237.44	-0.675801	0.0832705	-8.11573	4.82861e-16	3.10774e-14	BDKRB1	bradykinin receptor B1 [Source:HGNC Symbol;Acc:HGNC:1029]	7035.03	3764.02	5801.92	4327.06	6588.73	3907.9	bradykinin receptor B1 [Source:HGNC Symbol;Acc:HGNC:1029]
ENSG00000185697	1405.03	-0.662603	0.0817019	-8.11001	5.06155e-16	3.2442e-14	MYBL1	MYB proto-oncogene like 1 [Source:HGNC Symbol;Acc:HGNC:7547]	1655.74	1157.7	1819.43	1067.8	1715.36	1014.12	MYB proto-oncogene like 1 [Source:HGNC Symbol;Acc:HGNC:7547]
ENSG00000116663	512.452	-0.850942	0.105053	-8.1001	5.49157e-16	3.50534e-14	FBXO6	F-box protein 6 [Source:HGNC Symbol;Acc:HGNC:13585]	662.742	367.543	622.55	344.159	713.414	364.307	F-box protein 6 [Source:HGNC Symbol;Acc:HGNC:13585]
ENSG00000182158	2012.42	0.689089	0.085334	8.0752	6.73651e-16	4.28238e-14	CREB3L2	cAMP responsive element binding protein 3 like 2 [Source:HGNC Symbol;Acc:HGNC:23720]	1550.86	2256.74	1620.46	2635.89	1406.13	2604.41	cAMP responsive element binding protein 3 like 2 [Source:HGNC Symbol;Acc:HGNC:23720]
ENSG00000135655	2173.72	-0.614371	0.0761004	-8.07316	6.85044e-16	4.33703e-14	USP15	ubiquitin specific peptidase 15 [Source:HGNC Symbol;Acc:HGNC:12613]	2619.73	1854.47	2588.46	1585.18	2712.43	1682.01	ubiquitin specific peptidase 15 [Source:HGNC Symbol;Acc:HGNC:12613]
ENSG00000160255	170.858	-1.26855	0.157365	-8.0612	7.5549e-16	4.76358e-14	ITGB2	integrin subunit beta 2 [Source:HGNC Symbol;Acc:HGNC:6155]	225.377	94.5794	266.11	87.7492	254.443	96.8902	integrin subunit beta 2 [Source:HGNC Symbol;Acc:HGNC:6155]
ENSG00000168386	11722.9	-0.642381	0.0797567	-8.05426	7.9961e-16	5.00396e-14	FILIP1L	filamin A interacting protein 1 like [Source:HGNC Symbol;Acc:HGNC:24589]	14824.3	9862.6	15347.7	8825.06	12884.1	8593.51	filamin A interacting protein 1 like [Source:HGNC Symbol;Acc:HGNC:24589]
ENSG00000147475	1125.8	0.66548	0.0826254	8.05419	8.00065e-16	5.00396e-14	ERLIN2	ER lipid raft associated 2 [Source:HGNC Symbol;Acc:HGNC:1356]	837.539	1380.38	931.994	1381.19	818.113	1405.55	ER lipid raft associated 2 [Source:HGNC Symbol;Acc:HGNC:1356]
ENSG00000050405	8718.71	-0.638604	0.0793354	-8.04942	8.31878e-16	5.18203e-14	LIMA1	LIM domain and actin binding 1 [Source:HGNC Symbol;Acc:HGNC:24636]	10897.7	7440.65	10787.2	5966.94	10303.1	6916.67	LIM domain and actin binding 1 [Source:HGNC Symbol;Acc:HGNC:24636]
ENSG00000123609	1763.73	-0.857873	0.106748	-8.03645	9.2482e-16	5.73795e-14	NMI	N-myc and STAT interactor [Source:HGNC Symbol;Acc:HGNC:7854]	2161.53	1405.52	2221.65	1013.1	2505.47	1275.07	N-myc and STAT interactor [Source:HGNC Symbol;Acc:HGNC:7854]
ENSG00000152332	6021.77	-0.648159	0.080667	-8.035	9.35811e-16	5.78301e-14	UHMK1	U2AF homology motif kinase 1 [Source:HGNC Symbol;Acc:HGNC:19683]	7471.65	5171.94	7777.6	4254.13	6904.05	4551.25	U2AF homology motif kinase 1 [Source:HGNC Symbol;Acc:HGNC:19683]
ENSG00000148158	501.938	0.830399	0.103437	8.02803	9.90481e-16	6.09657e-14	SNX30	sorting nexin family member 30 [Source:HGNC Symbol;Acc:HGNC:23685]	353.314	665.648	372.309	606.267	338.446	675.648	sorting nexin family member 30 [Source:HGNC Symbol;Acc:HGNC:23685]
ENSG00000145391	1694.86	0.739875	0.0921869	8.02581	1.0086e-15	6.18358e-14	SETD7	SET domain containing lysine methyltransferase 7 [Source:HGNC Symbol;Acc:HGNC:30412]	1158.12	2338.15	1251.81	1907.69	1359.87	2153.55	SET domain containing lysine methyltransferase 7 [Source:HGNC Symbol;Acc:HGNC:30412]
ENSG00000110436	355.646	0.925759	0.115377	8.02374	1.02574e-15	6.2639e-14	SLC1A2	solute carrier family 1 member 2 [Source:HGNC Symbol;Acc:HGNC:10940]	243.972	477.686	232.541	438.746	242.269	498.661	solute carrier family 1 member 2 [Source:HGNC Symbol;Acc:HGNC:10940]
ENSG00000138835	1358.15	0.757537	0.0946398	8.00442	1.20027e-15	7.30096e-14	RGS3	regulator of G-protein signaling 3 [Source:HGNC Symbol;Acc:HGNC:9999]	1091.92	1601.86	985.704	1906.55	911.855	1651.01	regulator of G-protein signaling 3 [Source:HGNC Symbol;Acc:HGNC:9999]
ENSG00000164171	18245.3	0.441101	0.0551639	7.99619	1.28332e-15	7.77562e-14	ITGA2	integrin subunit alpha 2 [Source:HGNC Symbol;Acc:HGNC:6137]	16085.8	20602.7	15240.3	21468.9	15007.3	21066.5	integrin subunit alpha 2 [Source:HGNC Symbol;Acc:HGNC:6137]
ENSG00000122068	2581.61	-0.682909	0.0854495	-7.99196	1.32813e-15	8.01582e-14	FYTTD1	forty-two-three domain containing 1 [Source:HGNC Symbol;Acc:HGNC:25407]	3006.51	2115.47	3245.8	1729.91	3343.06	2048.9	forty-two-three domain containing 1 [Source:HGNC Symbol;Acc:HGNC:25407]
ENSG00000239713	958.15	-0.852952	0.106756	-7.98974	1.35227e-15	8.12988e-14	APOBEC3G	apolipoprotein B mRNA editing enzyme catalytic subunit 3G [Source:HGNC Symbol;Acc:HGNC:17357]	1267.47	695.578	1207.26	553.845	1261.26	763.495	apolipoprotein B mRNA editing enzyme catalytic subunit 3G [Source:HGNC Symbol;Acc:HGNC:17357]
ENSG00000139734	683.487	-0.918367	0.115015	-7.98475	1.40804e-15	8.4325e-14	DIAPH3	diaphanous related formin 3 [Source:HGNC Symbol;Acc:HGNC:15480]	853.159	505.222	820.911	417.093	1043.34	461.197	diaphanous related formin 3 [Source:HGNC Symbol;Acc:HGNC:15480]
ENSG00000079385	370.921	-1.09752	0.137508	-7.9815	1.44565e-15	8.62441e-14	CEACAM1	carcinoembryonic antigen related cell adhesion molecule 1 [Source:HGNC Symbol;Acc:HGNC:1814]	510.259	272.963	479.119	183.476	558.8	220.91	carcinoembryonic antigen related cell adhesion molecule 1 [Source:HGNC Symbol;Acc:HGNC:1814]
ENSG00000038427	146.459	1.36709	0.171362	7.97781	1.48955e-15	8.85225e-14	VCAN	versican [Source:HGNC Symbol;Acc:HGNC:2464]	78.8447	198.737	63.4757	202.849	80.3504	254.498	versican [Source:HGNC Symbol;Acc:HGNC:2464]
ENSG00000157601	45290.9	-0.503684	0.0631589	-7.97486	1.52555e-15	9.03161e-14	MX1	MX dynamin like GTPase 1 [Source:HGNC Symbol;Acc:HGNC:7532]	53588.4	38709.3	51024.7	34807.9	55100.9	38514.5	MX dynamin like GTPase 1 [Source:HGNC Symbol;Acc:HGNC:7532]
ENSG00000182326	31059.4	-0.480954	0.0603205	-7.97332	1.54473e-15	9.1104e-14	C1S	complement C1s [Source:HGNC Symbol;Acc:HGNC:1247]	37318.1	26325.4	34563.1	24531	36901.5	26717.1	complement C1s [Source:HGNC Symbol;Acc:HGNC:1247]
ENSG00000003402	4066.72	-0.636634	0.0799412	-7.96378	1.66867e-15	9.80405e-14	CFLAR	CASP8 and FADD like apoptosis regulator [Source:HGNC Symbol;Acc:HGNC:1876]	5297.47	3458.73	4770.44	2868.37	4845.37	3159.91	CASP8 and FADD like apoptosis regulator [Source:HGNC Symbol;Acc:HGNC:1876]
ENSG00000151014	468.277	-1.09233	0.13718	-7.96277	1.68227e-15	9.84669e-14	CCRN4L	nocturnin [Source:HGNC Symbol;Acc:HGNC:14254]	713.321	341.204	694.57	274.644	541.756	244.163	nocturnin [Source:HGNC Symbol;Acc:HGNC:14254]
ENSG00000179222	5170.73	0.563861	0.0711288	7.92732	2.23922e-15	1.30573e-13	MAGED1	MAGE family member D1 [Source:HGNC Symbol;Acc:HGNC:6813]	4224.14	6079.42	4406.07	6499.14	3823.95	5991.69	MAGE family member D1 [Source:HGNC Symbol;Acc:HGNC:6813]
ENSG00000140511	301.999	-1.19622	0.151054	-7.91912	2.39192e-15	1.38955e-13	HAPLN3	hyaluronan and proteoglycan link protein 3 [Source:HGNC Symbol;Acc:HGNC:21446]	503.565	202.328	360.713	160.684	430.97	153.732	hyaluronan and proteoglycan link protein 3 [Source:HGNC Symbol;Acc:HGNC:21446]
ENSG00000111859	1243.19	-0.978327	0.123689	-7.90958	2.58269e-15	1.49478e-13	NEDD9	neural precursor cell expressed, developmentally down-regulated 9 [Source:HGNC Symbol;Acc:HGNC:7733]	1834.26	987.696	1763.28	687.179	1421.96	764.787	neural precursor cell expressed, developmentally down-regulated 9 [Source:HGNC Symbol;Acc:HGNC:7733]
ENSG00000116514	1572.57	-0.706927	0.0894124	-7.90636	2.65018e-15	1.52814e-13	RNF19B	ring finger protein 19B [Source:HGNC Symbol;Acc:HGNC:26886]	2063.35	1255.87	1754.13	1106.55	2070.85	1184.64	ring finger protein 19B [Source:HGNC Symbol;Acc:HGNC:26886]
ENSG00000146966	3578.96	0.488733	0.0618318	7.90423	2.69596e-15	1.54878e-13	DENND2A	DENN domain containing 2A [Source:HGNC Symbol;Acc:HGNC:22212]	3051.14	4076.49	2868	4191.45	2991.23	4295.46	DENN domain containing 2A [Source:HGNC Symbol;Acc:HGNC:22212]
ENSG00000198911	4090.98	-0.494524	0.0626056	-7.89905	2.81034e-15	1.60853e-13	SREBF2	sterol regulatory element binding transcription factor 2 [Source:HGNC Symbol;Acc:HGNC:11290]	4803.58	3378.52	4999.32	3328.77	4579.97	3455.75	sterol regulatory element binding transcription factor 2 [Source:HGNC Symbol;Acc:HGNC:11290]
ENSG00000019549	841.603	0.768423	0.0973651	7.89218	2.9696e-15	1.69344e-13	SNAI2	snail family transcriptional repressor 2 [Source:HGNC Symbol;Acc:HGNC:11094]	589.848	1161.29	613.395	949.287	641.586	1094.21	snail family transcriptional repressor 2 [Source:HGNC Symbol;Acc:HGNC:11094]
ENSG00000104549	2407.59	-0.699163	0.0888605	-7.8681	3.60065e-15	2.04577e-13	SQLE	squalene epoxidase [Source:HGNC Symbol;Acc:HGNC:11279]	2844.36	1992.15	3319.04	1676.35	2825.66	1787.95	squalene epoxidase [Source:HGNC Symbol;Acc:HGNC:11279]
ENSG00000115009	105.325	-1.53436	0.195043	-7.86679	3.63846e-15	2.05971e-13	CCL20	C-C motif chemokine ligand 20 [Source:HGNC Symbol;Acc:HGNC:10619]	192.649	52.6771	164.182	41.0256	138.787	42.6317	C-C motif chemokine ligand 20 [Source:HGNC Symbol;Acc:HGNC:10619]
ENSG00000096968	1746.39	-0.730193	0.0929276	-7.85765	3.91409e-15	2.20769e-13	JAK2	Janus kinase 2 [Source:HGNC Symbol;Acc:HGNC:6192]	2153.35	1471.37	2156.34	1125.92	2271.72	1299.62	Janus kinase 2 [Source:HGNC Symbol;Acc:HGNC:6192]
ENSG00000205336	682.736	0.714097	0.0909608	7.85059	4.14069e-15	2.32704e-13	GPR56	adhesion G protein-coupled receptor G1 [Source:HGNC Symbol;Acc:HGNC:4512]	522.16	853.609	523.674	825.07	486.972	884.93	adhesion G protein-coupled receptor G1 [Source:HGNC Symbol;Acc:HGNC:4512]
ENSG00000143013	898.316	-0.658079	0.0838875	-7.84479	4.33691e-15	2.42851e-13	LMO4	LIM domain only 4 [Source:HGNC Symbol;Acc:HGNC:6644]	1093.41	709.944	1110.21	652.991	1111.51	711.82	LIM domain only 4 [Source:HGNC Symbol;Acc:HGNC:6644]
ENSG00000123240	9208.77	-0.564224	0.0720722	-7.8286	4.93348e-15	2.75263e-13	OPTN	optineurin [Source:HGNC Symbol;Acc:HGNC:17142]	11532.2	7994.95	10450.9	6835.32	11084.7	7354.61	optineurin [Source:HGNC Symbol;Acc:HGNC:17142]
ENSG00000134294	30555.3	-0.519059	0.0663357	-7.82474	5.08722e-15	2.82824e-13	SLC38A2	solute carrier family 38 member 2 [Source:HGNC Symbol;Acc:HGNC:13448]	34886.5	26733.7	37683.2	23261.5	35684.1	25082.9	solute carrier family 38 member 2 [Source:HGNC Symbol;Acc:HGNC:13448]
ENSG00000197646	1220.43	-0.674292	0.0863456	-7.80922	5.75427e-15	3.18766e-13	PDCD1LG2	programmed cell death 1 ligand 2 [Source:HGNC Symbol;Acc:HGNC:18731]	1405.82	895.511	1501.44	905.982	1620.4	993.447	programmed cell death 1 ligand 2 [Source:HGNC Symbol;Acc:HGNC:18731]
ENSG00000181541	3036.76	-0.611907	0.0784872	-7.79627	6.37649e-15	3.5163e-13	MAB21L2	mab-21 like 2 [Source:HGNC Symbol;Acc:HGNC:6758]	3561.4	2625.48	3596.14	2242.73	3904.3	2290.48	mab-21 like 2 [Source:HGNC Symbol;Acc:HGNC:6758]
ENSG00000101608	5129.41	-0.62068	0.0796157	-7.79594	6.39286e-15	3.5163e-13	MYL12A	myosin light chain 12A [Source:HGNC Symbol;Acc:HGNC:16701]	5923.02	4096.85	5783.61	3917.94	7027.01	4028.05	myosin light chain 12A [Source:HGNC Symbol;Acc:HGNC:16701]
ENSG00000183283	2943.37	-0.485521	0.0622961	-7.79375	6.50477e-15	3.56521e-13	DAZAP2	DAZ associated protein 2 [Source:HGNC Symbol;Acc:HGNC:2684]	3431.23	2395.61	3372.14	2423.93	3522.03	2515.27	DAZ associated protein 2 [Source:HGNC Symbol;Acc:HGNC:2684]
ENSG00000185950	1472.27	-0.683705	0.0878778	-7.78018	7.24198e-15	3.95529e-13	IRS2	insulin receptor substrate 2 [Source:HGNC Symbol;Acc:HGNC:6126]	1957.73	1083.47	1848.73	1212.53	1666.66	1064.5	insulin receptor substrate 2 [Source:HGNC Symbol;Acc:HGNC:6126]
ENSG00000013016	2330.13	0.651396	0.0837543	7.77747	7.39915e-15	4.02695e-13	EHD3	EH domain containing 3 [Source:HGNC Symbol;Acc:HGNC:3244]	1981.53	2742.8	1803.56	2967.52	1605.79	2879.58	EH domain containing 3 [Source:HGNC Symbol;Acc:HGNC:3244]
ENSG00000166923	3413.78	0.702017	0.0903889	7.76662	8.06059e-15	4.3716e-13	GREM1	gremlin 1, DAN family BMP antagonist [Source:HGNC Symbol;Acc:HGNC:2001]	2512.62	4046.56	2354.7	4743.01	2859.74	3966.04	gremlin 1, DAN family BMP antagonist [Source:HGNC Symbol;Acc:HGNC:2001]
ENSG00000107438	9050.05	-0.430495	0.0555817	-7.74526	9.53893e-15	5.15534e-13	PDLIM1	PDZ and LIM domain 1 [Source:HGNC Symbol;Acc:HGNC:2067]	10590.5	7815.37	10026.7	7566.94	10603.8	7696.96	PDZ and LIM domain 1 [Source:HGNC Symbol;Acc:HGNC:2067]
ENSG00000138190	469.94	-0.828103	0.107089	-7.73285	1.05162e-14	5.66377e-13	EXOC6	exocyst complex component 6 [Source:HGNC Symbol;Acc:HGNC:23196]	577.947	356.768	607.902	322.507	636.716	317.8	exocyst complex component 6 [Source:HGNC Symbol;Acc:HGNC:23196]
ENSG00000067167	11624.2	-0.671313	0.0869195	-7.72339	1.13272e-14	6.07943e-13	TRAM1	translocation associated membrane protein 1 [Source:HGNC Symbol;Acc:HGNC:20568]	12838.3	9309.49	13877.4	8264.38	16364.7	9090.88	translocation associated membrane protein 1 [Source:HGNC Symbol;Acc:HGNC:20568]
ENSG00000166347	1284.63	-0.796702	0.103174	-7.72193	1.14583e-14	6.12864e-13	CYB5A	cytochrome b5 type A [Source:HGNC Symbol;Acc:HGNC:2570]	1592.51	1004.46	1488.63	814.814	1856.58	950.816	cytochrome b5 type A [Source:HGNC Symbol;Acc:HGNC:2570]
ENSG00000128284	1432.63	-0.66591	0.0864131	-7.70612	1.297e-14	6.91335e-13	APOL3	apolipoprotein L3 [Source:HGNC Symbol;Acc:HGNC:14868]	1839.46	1160.09	1649.15	994.871	1812.75	1139.43	apolipoprotein L3 [Source:HGNC Symbol;Acc:HGNC:14868]
ENSG00000170214	98.3582	-1.56211	0.202767	-7.70399	1.31884e-14	7.00564e-13	ADRA1B	adrenoceptor alpha 1B [Source:HGNC Symbol;Acc:HGNC:278]	130.168	41.9023	143.431	39.886	196.006	38.7561	adrenoceptor alpha 1B [Source:HGNC Symbol;Acc:HGNC:278]
ENSG00000136156	9101.42	-0.519745	0.067501	-7.69982	1.36257e-14	7.21325e-13	ITM2B	integral membrane protein 2B [Source:HGNC Symbol;Acc:HGNC:6174]	10052	7226.35	10598.6	7554.41	11609.4	7567.77	integral membrane protein 2B [Source:HGNC Symbol;Acc:HGNC:6174]
ENSG00000162645	3360.77	-0.848933	0.11028	-7.69799	1.38221e-14	7.29235e-13	GBP2	guanylate binding protein 2 [Source:HGNC Symbol;Acc:HGNC:4183]	4654.81	2698.51	4334.66	1845.01	4112.48	2519.14	guanylate binding protein 2 [Source:HGNC Symbol;Acc:HGNC:4183]
ENSG00000026103	2976.72	-0.584789	0.0763363	-7.6607	1.84924e-14	9.72322e-13	FAS	Fas cell surface death receptor [Source:HGNC Symbol;Acc:HGNC:11920]	3383.63	2534.49	3547.31	2219.94	3827.6	2347.33	Fas cell surface death receptor [Source:HGNC Symbol;Acc:HGNC:11920]
ENSG00000104067	6175.15	-0.558905	0.072987	-7.6576	1.89434e-14	9.92674e-13	TJP1	tight junction protein 1 [Source:HGNC Symbol;Acc:HGNC:11827]	7500.66	5411.38	7536.51	4548.14	7102.49	4951.73	tight junction protein 1 [Source:HGNC Symbol;Acc:HGNC:11827]
ENSG00000063180	131.231	1.32148	0.172715	7.65124	1.99044e-14	1.03952e-12	CA11	carbonic anhydrase 11 [Source:HGNC Symbol;Acc:HGNC:1370]	74.3818	166.412	65.3067	207.407	63.3064	210.575	carbonic anhydrase 11 [Source:HGNC Symbol;Acc:HGNC:1370]
ENSG00000118503	6824.63	-0.857291	0.112212	-7.63993	2.17344e-14	1.13128e-12	TNFAIP3	TNF alpha induced protein 3 [Source:HGNC Symbol;Acc:HGNC:11896]	10541.4	4654.74	6868.8	4743.01	9269.51	4870.35	TNF alpha induced protein 3 [Source:HGNC Symbol;Acc:HGNC:11896]
ENSG00000131389	4334.39	0.557501	0.0729925	7.63778	2.20993e-14	1.14643e-12	SLC6A6	solute carrier family 6 member 6 [Source:HGNC Symbol;Acc:HGNC:11052]	3684.13	5090.53	3499.1	4888.88	3282.19	5561.5	solute carrier family 6 member 6 [Source:HGNC Symbol;Acc:HGNC:11052]
ENSG00000165527	3558.37	-0.454078	0.0594761	-7.63463	2.26462e-14	1.17088e-12	ARF6	ADP ribosylation factor 6 [Source:HGNC Symbol;Acc:HGNC:659]	4186.95	3010.98	4146.06	3042.73	4029.69	2933.83	ADP ribosylation factor 6 [Source:HGNC Symbol;Acc:HGNC:659]
ENSG00000205045	107.578	-1.5897	0.208387	-7.62861	2.37294e-14	1.22281e-12	SLFN12L	schlafen family member 12 like [Source:HGNC Symbol;Acc:HGNC:33920]	165.128	61.0576	160.52	25.0712	192.354	41.3398	schlafen family member 12 like [Source:HGNC Symbol;Acc:HGNC:33920]
ENSG00000113387	1901.37	-0.610613	0.0800512	-7.62778	2.38833e-14	1.22667e-12	SUB1	SUB1 homolog, transcriptional regulator [Source:HGNC Symbol;Acc:HGNC:19985]	2244.84	1543.2	2216.16	1375.5	2464.08	1564.45	SUB1 homolog, transcriptional regulator [Source:HGNC Symbol;Acc:HGNC:19985]
ENSG00000204611	125.439	1.40109	0.183727	7.62596	2.42218e-14	1.23995e-12	ZNF616	zinc finger protein 616 [Source:HGNC Symbol;Acc:HGNC:28062]	52.0673	190.356	72.6308	218.803	56.0018	162.776	zinc finger protein 616 [Source:HGNC Symbol;Acc:HGNC:28062]
ENSG00000177374	665.044	1.17946	0.154783	7.62007	2.53535e-14	1.2903e-12	HIC1	HIC ZBTB transcriptional repressor 1 [Source:HGNC Symbol;Acc:HGNC:4909]	476.787	742.269	381.464	1099.71	283.661	1006.37	HIC ZBTB transcriptional repressor 1 [Source:HGNC Symbol;Acc:HGNC:4909]
ENSG00000101290	2043.13	0.539215	0.0707633	7.61998	2.53718e-14	1.2903e-12	CDS2	CDP-diacylglycerol synthase 2 [Source:HGNC Symbol;Acc:HGNC:1801]	1602.18	2423.15	1613.75	2372.65	1764.06	2482.97	CDP-diacylglycerol synthase 2 [Source:HGNC Symbol;Acc:HGNC:1801]
ENSG00000134758	386.432	-1.00064	0.131498	-7.60957	2.75005e-14	1.39399e-12	RNF138	ring finger protein 138 [Source:HGNC Symbol;Acc:HGNC:17765]	511.747	301.696	525.505	206.268	535.669	237.704	ring finger protein 138 [Source:HGNC Symbol;Acc:HGNC:17765]
ENSG00000110090	2213.05	0.599597	0.0788552	7.60377	2.8762e-14	1.45318e-12	CPT1A	carnitine palmitoyltransferase 1A [Source:HGNC Symbol;Acc:HGNC:2328]	1912.36	2585.97	1705.3	2792.02	1625.27	2657.37	carnitine palmitoyltransferase 1A [Source:HGNC Symbol;Acc:HGNC:2328]
ENSG00000122863	1326.48	0.57669	0.0758895	7.59908	2.98241e-14	1.50195e-12	CHST3	carbohydrate sulfotransferase 3 [Source:HGNC Symbol;Acc:HGNC:1971]	1098.62	1575.53	1004.01	1580.62	1076.21	1623.88	carbohydrate sulfotransferase 3 [Source:HGNC Symbol;Acc:HGNC:1971]
ENSG00000197321	4405.65	0.741911	0.0976712	7.596	3.05417e-14	1.53312e-12	SVIL	supervillin [Source:HGNC Symbol;Acc:HGNC:11480]	3676.69	5094.12	3314.16	6088.88	2770.87	5489.15	supervillin [Source:HGNC Symbol;Acc:HGNC:11480]
ENSG00000141753	34234.8	0.578171	0.0761599	7.59155	3.16107e-14	1.58166e-12	IGFBP4	insulin like growth factor binding protein 4 [Source:HGNC Symbol;Acc:HGNC:5473]	29093	37144.6	26435.8	44876.3	26410.9	41448.3	insulin like growth factor binding protein 4 [Source:HGNC Symbol;Acc:HGNC:5473]
ENSG00000169710	7008.39	-0.608723	0.0802335	-7.5869	3.27653e-14	1.63416e-12	FASN	fatty acid synthase [Source:HGNC Symbol;Acc:HGNC:3594]	8597.05	5789.7	9348.62	5398.28	7554.15	5362.55	fatty acid synthase [Source:HGNC Symbol;Acc:HGNC:3594]
ENSG00000141052	466.126	0.993022	0.131072	7.57618	3.55874e-14	1.76922e-12	MYOCD	myocardin [Source:HGNC Symbol;Acc:HGNC:16067]	280.419	659.662	302.12	507.122	321.402	726.03	myocardin [Source:HGNC Symbol;Acc:HGNC:16067]
ENSG00000185963	610.779	0.757611	0.100042	7.5729	3.64986e-14	1.80872e-12	BICD2	BICD cargo adaptor 2 [Source:HGNC Symbol;Acc:HGNC:17208]	416.538	731.494	455.926	758.973	472.363	829.38	BICD cargo adaptor 2 [Source:HGNC Symbol;Acc:HGNC:17208]
ENSG00000166128	3368.44	-0.58593	0.0773915	-7.57099	3.70393e-14	1.82967e-12	RAB8B	RAB8B, member RAS oncogene family [Source:HGNC Symbol;Acc:HGNC:30273]	3899.84	2802.66	4041.69	2405.69	4235.44	2825.32	RAB8B, member RAS oncogene family [Source:HGNC Symbol;Acc:HGNC:30273]
ENSG00000162545	3814.37	-0.549314	0.0725613	-7.57035	3.72213e-14	1.83282e-12	CAMK2N1	calcium/calmodulin dependent protein kinase II inhibitor 1 [Source:HGNC Symbol;Acc:HGNC:24190]	4354.31	3130.7	4437.19	2876.35	4850.24	3237.42	calcium/calmodulin dependent protein kinase II inhibitor 1 [Source:HGNC Symbol;Acc:HGNC:24190]
ENSG00000152284	467.227	0.788442	0.104354	7.55547	4.17366e-14	2.04866e-12	TCF7L1	transcription factor 7 like 1 [Source:HGNC Symbol;Acc:HGNC:11640]	351.826	599.801	319.82	570.939	340.88	620.097	transcription factor 7 like 1 [Source:HGNC Symbol;Acc:HGNC:11640]
ENSG00000186318	1567.94	0.564681	0.0747655	7.55269	4.26352e-14	2.08617e-12	BACE1	beta-secretase 1 [Source:HGNC Symbol;Acc:HGNC:933]	1262.26	1792.22	1306.74	1950.99	1202.82	1892.59	beta-secretase 1 [Source:HGNC Symbol;Acc:HGNC:933]
ENSG00000103449	2194.48	0.563715	0.0746598	7.55045	4.33753e-14	2.1157e-12	SALL1	spalt like transcription factor 1 [Source:HGNC Symbol;Acc:HGNC:10524]	1832.77	2510.54	1768.16	2552.7	1681.27	2821.44	spalt like transcription factor 1 [Source:HGNC Symbol;Acc:HGNC:10524]
ENSG00000136153	4522.52	-0.436544	0.0578263	-7.54924	4.37815e-14	2.12882e-12	LMO7	LIM domain 7 [Source:HGNC Symbol;Acc:HGNC:6646]	5334.66	3874.16	5203.78	3760.68	5090.08	3871.73	LIM domain 7 [Source:HGNC Symbol;Acc:HGNC:6646]
ENSG00000120533	1761.5	-0.589102	0.0780644	-7.54636	4.47587e-14	2.16954e-12	ENY2	ENY2, transcription and export complex 2 subunit [Source:HGNC Symbol;Acc:HGNC:24449]	2203.93	1479.75	2188.08	1337.89	1978.32	1381.01	ENY2, transcription and export complex 2 subunit [Source:HGNC Symbol;Acc:HGNC:24449]
ENSG00000124702	1003.09	0.61363	0.0815385	7.52565	5.24593e-14	2.53488e-12	KLHDC3	kelch domain containing 3 [Source:HGNC Symbol;Acc:HGNC:20704]	753.488	1170.87	806.263	1255.84	803.504	1228.57	kelch domain containing 3 [Source:HGNC Symbol;Acc:HGNC:20704]
ENSG00000019582	59.6423	-1.70379	0.227197	-7.49917	6.42248e-14	3.09376e-12	CD74	CD74 molecule [Source:HGNC Symbol;Acc:HGNC:1697]	113.804	21.5497	81.786	20.5128	104.699	15.5024	CD74 molecule [Source:HGNC Symbol;Acc:HGNC:1697]
ENSG00000166888	7457.55	-0.512391	0.0683547	-7.49607	6.57611e-14	3.15796e-12	STAT6	signal transducer and activator of transcription 6 [Source:HGNC Symbol;Acc:HGNC:11368]	9532.77	6199.14	8606.45	5984.04	8232.26	6190.64	signal transducer and activator of transcription 6 [Source:HGNC Symbol;Acc:HGNC:11368]
ENSG00000041357	4446.08	-0.530504	0.0708417	-7.48859	6.96163e-14	3.33277e-12	PSMA4	proteasome subunit alpha 4 [Source:HGNC Symbol;Acc:HGNC:9533]	5125.65	3802.33	5067.07	3399.43	5620.88	3661.16	proteasome subunit alpha 4 [Source:HGNC Symbol;Acc:HGNC:9533]
ENSG00000213722	910.398	0.640715	0.085639	7.48157	7.34373e-14	3.50488e-12	DDAH2	dimethylarginine dimethylaminohydrolase 2 [Source:HGNC Symbol;Acc:HGNC:2716]	711.09	1039.18	706.777	1127.06	698.805	1179.48	dimethylarginine dimethylaminohydrolase 2 [Source:HGNC Symbol;Acc:HGNC:2716]
ENSG00000089127	13466.4	-0.507059	0.0678281	-7.47565	7.68226e-14	3.6552e-12	OAS1	2'-5'-oligoadenylate synthetase 1 [Source:HGNC Symbol;Acc:HGNC:8086]	15701.3	11377.1	15010.8	10357.8	16841.9	11509.3	2'-5'-oligoadenylate synthetase 1 [Source:HGNC Symbol;Acc:HGNC:8086]
ENSG00000206190	1141.84	-0.63414	0.0848512	-7.47356	7.80553e-14	3.70249e-12	ATP10A	ATPase phospholipid transporting 10A (putative) [Source:HGNC Symbol;Acc:HGNC:13542]	1387.96	906.286	1319.56	831.908	1481.61	923.686	ATPase phospholipid transporting 10A (putative) [Source:HGNC Symbol;Acc:HGNC:13542]
ENSG00000175130	731.414	-0.742524	0.0993595	-7.47311	7.8321e-14	3.70377e-12	MARCKSL1	MARCKS like 1 [Source:HGNC Symbol;Acc:HGNC:7142]	999.691	569.871	853.87	547.008	915.507	502.537	MARCKS like 1 [Source:HGNC Symbol;Acc:HGNC:7142]
ENSG00000133328	92.5086	-1.59115	0.213056	-7.46822	8.12871e-14	3.83235e-12	HRASLS2	HRAS like suppressor 2 [Source:HGNC Symbol;Acc:HGNC:17824]	161.408	43.0995	118.407	22.792	168.005	41.3398	HRAS like suppressor 2 [Source:HGNC Symbol;Acc:HGNC:17824]
ENSG00000160216	3454.26	-0.48237	0.0646859	-7.45711	8.8438e-14	4.15685e-12	AGPAT3	1-acylglycerol-3-phosphate O-acyltransferase 3 [Source:HGNC Symbol;Acc:HGNC:326]	4216.7	2761.96	3934.88	2916.24	3954.21	2941.59	1-acylglycerol-3-phosphate O-acyltransferase 3 [Source:HGNC Symbol;Acc:HGNC:326]
ENSG00000213626	5887.67	-0.667717	0.089562	-7.45536	8.96223e-14	4.19979e-12	LBH	limb bud and heart development [Source:HGNC Symbol;Acc:HGNC:29532]	6830.48	4620.03	7088.52	3909.97	7886.51	4990.49	limb bud and heart development [Source:HGNC Symbol;Acc:HGNC:29532]
ENSG00000105281	5118.46	0.643062	0.0863144	7.45022	9.31827e-14	4.35348e-12	SLC1A5	solute carrier family 1 member 5 [Source:HGNC Symbol;Acc:HGNC:10943]	4172.82	5739.41	4228.46	6697.43	3483.07	6389.58	solute carrier family 1 member 5 [Source:HGNC Symbol;Acc:HGNC:10943]
ENSG00000145040	357.196	0.982452	0.131922	7.44725	9.53076e-14	4.4261e-12	UCN2	urocortin 2 [Source:HGNC Symbol;Acc:HGNC:18414]	267.031	427.403	225.217	516.239	200.876	506.413	urocortin 2 [Source:HGNC Symbol;Acc:HGNC:18414]
ENSG00000164096	2825.34	-0.481611	0.0646674	-7.44752	9.51127e-14	4.4261e-12	C4orf3	chromosome 4 open reading frame 3 [Source:HGNC Symbol;Acc:HGNC:19225]	3352.39	2401.6	3173.78	2280.34	3375.93	2368	chromosome 4 open reading frame 3 [Source:HGNC Symbol;Acc:HGNC:19225]
ENSG00000140416	5933.74	-0.563966	0.0757909	-7.44108	9.98657e-14	4.62393e-12	TPM1	tropomyosin 1 (alpha) [Source:HGNC Symbol;Acc:HGNC:12010]	6885.52	5079.75	7089.13	4247.29	7338.67	4962.07	tropomyosin 1 (alpha) [Source:HGNC Symbol;Acc:HGNC:12010]
ENSG00000157111	496.889	-0.926377	0.124608	-7.43436	1.05078e-13	4.8508e-12	TMEM171	transmembrane protein 171 [Source:HGNC Symbol;Acc:HGNC:27031]	769.108	360.36	625.601	338.461	586.801	301.006	transmembrane protein 171 [Source:HGNC Symbol;Acc:HGNC:27031]
ENSG00000240065	3400.68	-0.571836	0.07697	-7.42934	1.0914e-13	5.02338e-12	PSMB9	proteasome subunit beta 9 [Source:HGNC Symbol;Acc:HGNC:9546]	4027.77	2788.3	3854.93	2498	4363.27	2871.83	proteasome subunit beta 9 [Source:HGNC Symbol;Acc:HGNC:9546]
ENSG00000166833	2072.63	-0.529823	0.0714365	-7.4167	1.20071e-13	5.51014e-12	NAV2	neuron navigator 2 [Source:HGNC Symbol;Acc:HGNC:15997]	2484.35	1763.49	2409.63	1576.07	2475.04	1727.23	neuron navigator 2 [Source:HGNC Symbol;Acc:HGNC:15997]
ENSG00000134824	5601.72	-0.525363	0.0709353	-7.40622	1.29947e-13	5.94576e-12	FADS2	fatty acid desaturase 2 [Source:HGNC Symbol;Acc:HGNC:3575]	6474.94	4913.34	6956.69	4243.87	6456.03	4565.47	fatty acid desaturase 2 [Source:HGNC Symbol;Acc:HGNC:3575]
ENSG00000135211	563.925	-0.844093	0.11401	-7.40367	1.32471e-13	6.04342e-12	TMEM60	transmembrane protein 60 [Source:HGNC Symbol;Acc:HGNC:21754]	668.692	371.134	690.908	413.675	841.244	397.896	transmembrane protein 60 [Source:HGNC Symbol;Acc:HGNC:21754]
ENSG00000132669	1572.02	0.528284	0.0713841	7.40058	1.35588e-13	6.16746e-12	RIN2	Ras and Rab interactor 2 [Source:HGNC Symbol;Acc:HGNC:18750]	1309.12	1841.31	1310.41	1895.15	1222.3	1853.83	Ras and Rab interactor 2 [Source:HGNC Symbol;Acc:HGNC:18750]
ENSG00000130517	915.575	0.653433	0.0884714	7.3858	1.51536e-13	6.87274e-12	PGPEP1	pyroglutamyl-peptidase I [Source:HGNC Symbol;Acc:HGNC:13568]	740.099	1099.04	731.191	1121.37	640.368	1161.39	pyroglutamyl-peptidase I [Source:HGNC Symbol;Acc:HGNC:13568]
ENSG00000133104	2467.73	-0.476635	0.0645445	-7.3846	1.52915e-13	6.91504e-12	SPG20	spastic paraplegia 20 (Troyer syndrome) [Source:HGNC Symbol;Acc:HGNC:18514]	2922.46	2123.85	2899.74	2045.58	2811.05	2003.69	spastic paraplegia 20 (Troyer syndrome) [Source:HGNC Symbol;Acc:HGNC:18514]
ENSG00000132718	2341.47	0.492809	0.0668654	7.37017	1.70406e-13	7.68362e-12	SYT11	synaptotagmin 11 [Source:HGNC Symbol;Acc:HGNC:19239]	1951.03	2742.8	1973.24	2635.89	1888.23	2857.61	synaptotagmin 11 [Source:HGNC Symbol;Acc:HGNC:19239]
ENSG00000159228	1239.33	-0.543238	0.0737932	-7.36163	1.81678e-13	8.16813e-12	CBR1	carbonyl reductase 1 [Source:HGNC Symbol;Acc:HGNC:1548]	1482.43	1015.23	1456.28	1008.55	1486.48	986.988	carbonyl reductase 1 [Source:HGNC Symbol;Acc:HGNC:1548]
ENSG00000204314	236.894	1.04738	0.142331	7.35878	1.85592e-13	8.32e-12	PRRT1	proline rich transmembrane protein 1 [Source:HGNC Symbol;Acc:HGNC:13943]	142.069	323.246	170.286	345.299	127.83	312.632	proline rich transmembrane protein 1 [Source:HGNC Symbol;Acc:HGNC:13943]
ENSG00000106591	1171.04	-0.609906	0.0829335	-7.35415	1.92143e-13	8.58884e-12	MRPL32	mitochondrial ribosomal protein L32 [Source:HGNC Symbol;Acc:HGNC:14035]	1446.73	900.3	1353.74	875.213	1464.57	985.696	mitochondrial ribosomal protein L32 [Source:HGNC Symbol;Acc:HGNC:14035]
ENSG00000104213	648.322	-0.817638	0.111212	-7.35206	1.95174e-13	8.69928e-12	PDGFRL	platelet derived growth factor receptor like [Source:HGNC Symbol;Acc:HGNC:8805]	834.564	504.025	742.787	443.304	933.769	431.484	platelet derived growth factor receptor like [Source:HGNC Symbol;Acc:HGNC:8805]
ENSG00000175274	4359.26	0.589868	0.0802474	7.35062	1.97288e-13	8.76827e-12	TP53I11	tumor protein p53 inducible protein 11 [Source:HGNC Symbol;Acc:HGNC:16842]	3640.99	4749.32	3528.39	5386.89	3200.62	5649.34	tumor protein p53 inducible protein 11 [Source:HGNC Symbol;Acc:HGNC:16842]
ENSG00000122378	196.784	1.19997	0.163415	7.3431	2.08696e-13	9.24882e-12	FAM213A	family with sequence similarity 213 member A [Source:HGNC Symbol;Acc:HGNC:28651]	108.597	225.075	99.4859	294.017	125.395	328.135	family with sequence similarity 213 member A [Source:HGNC Symbol;Acc:HGNC:28651]
ENSG00000146425	1682.02	-0.61338	0.0835997	-7.3371	2.18266e-13	9.64535e-12	DYNLT1	dynein light chain Tctex-type 1 [Source:HGNC Symbol;Acc:HGNC:11697]	1975.58	1403.13	1930.51	1249	2229.11	1304.79	dynein light chain Tctex-type 1 [Source:HGNC Symbol;Acc:HGNC:11697]
ENSG00000166780	876.238	0.710568	0.0969153	7.33185	2.27002e-13	1.00029e-11	C16orf45	chromosome 16 open reading frame 45 [Source:HGNC Symbol;Acc:HGNC:19213]	725.966	1046.36	656.119	1097.43	584.366	1147.18	chromosome 16 open reading frame 45 [Source:HGNC Symbol;Acc:HGNC:19213]
ENSG00000152223	3714.82	-0.567606	0.0774813	-7.32572	2.37623e-13	1.04413e-11	EPG5	ectopic P-granules autophagy protein 5 homolog [Source:HGNC Symbol;Acc:HGNC:29331]	4218.19	3242.04	4620.3	2716.81	4520.32	2971.3	ectopic P-granules autophagy protein 5 homolog [Source:HGNC Symbol;Acc:HGNC:29331]
ENSG00000073417	986.031	0.593383	0.0810145	7.32441	2.39951e-13	1.05138e-11	PDE8A	phosphodiesterase 8A [Source:HGNC Symbol;Acc:HGNC:8793]	784.728	1133.76	787.953	1237.61	769.416	1202.73	phosphodiesterase 8A [Source:HGNC Symbol;Acc:HGNC:8793]
ENSG00000170921	966.247	0.604325	0.0825334	7.32219	2.43954e-13	1.06591e-11	TANC2	tetratricopeptide repeat, ankyrin repeat and coiled-coil containing 2 [Source:HGNC Symbol;Acc:HGNC:30212]	780.265	1138.54	766.591	1143.02	735.328	1233.74	tetratricopeptide repeat, ankyrin repeat and coiled-coil containing 2 [Source:HGNC Symbol;Acc:HGNC:30212]
ENSG00000137947	692.173	-0.655253	0.0897209	-7.30324	2.80917e-13	1.22396e-11	GTF2B	general transcription factor IIB [Source:HGNC Symbol;Acc:HGNC:4648]	870.267	533.955	847.156	516.239	836.375	549.044	general transcription factor IIB [Source:HGNC Symbol;Acc:HGNC:4648]
ENSG00000214357	343.311	0.902015	0.123644	7.29524	2.98131e-13	1.29532e-11	NEURL1B	neuralized E3 ubiquitin protein ligase 1B [Source:HGNC Symbol;Acc:HGNC:35422]	233.559	429.798	244.137	421.652	219.137	511.58	neuralized E3 ubiquitin protein ligase 1B [Source:HGNC Symbol;Acc:HGNC:35422]
ENSG00000231290	287.85	-0.962563	0.132015	-7.29133	3.06903e-13	1.32971e-11	APCDD1L-AS1	APCDD1L antisense RNA 1 (head to head) [Source:HGNC Symbol;Acc:HGNC:27152]	426.208	177.187	352.778	194.872	382.273	193.78	APCDD1L antisense RNA 1 (head to head) [Source:HGNC Symbol;Acc:HGNC:27152]
ENSG00000112096	96935.8	-0.469281	0.064406	-7.28629	3.18604e-13	1.37656e-11	SOD2	superoxide dismutase 2, mitochondrial [Source:HGNC Symbol;Acc:HGNC:11180]	117104	82308	103827	78394.2	117512	82469	superoxide dismutase 2, mitochondrial [Source:HGNC Symbol;Acc:HGNC:11180]
ENSG00000180616	102.792	-1.369	0.187993	-7.28222	3.28375e-13	1.41484e-11	SSTR2	somatostatin receptor 2 [Source:HGNC Symbol;Acc:HGNC:11331]	146.532	46.6911	145.262	51.282	175.31	51.6748	somatostatin receptor 2 [Source:HGNC Symbol;Acc:HGNC:11331]
ENSG00000116260	49819.9	-0.481158	0.0661706	-7.27148	3.55577e-13	1.5278e-11	QSOX1	quiescin sulfhydryl oxidase 1 [Source:HGNC Symbol;Acc:HGNC:9756]	62218.1	40513.5	57838.5	43630.7	54511.7	40206.8	quiescin sulfhydryl oxidase 1 [Source:HGNC Symbol;Acc:HGNC:9756]
ENSG00000137877	325.237	-0.975509	0.134208	-7.26862	3.63177e-13	1.55614e-11	SPTBN5	spectrin beta, non-erythrocytic 5 [Source:HGNC Symbol;Acc:HGNC:15680]	482.738	210.709	444.94	186.894	387.143	238.996	spectrin beta, non-erythrocytic 5 [Source:HGNC Symbol;Acc:HGNC:15680]
ENSG00000117461	930.093	-0.716165	0.098637	-7.26062	3.85333e-13	1.64466e-11	PIK3R3	phosphoinositide-3-kinase regulatory subunit 3 [Source:HGNC Symbol;Acc:HGNC:8981]	1275.65	756.635	1152.94	642.734	1064.03	688.566	phosphoinositide-3-kinase regulatory subunit 3 [Source:HGNC Symbol;Acc:HGNC:8981]
ENSG00000185630	1086.16	0.580497	0.0799538	7.2604	3.85957e-13	1.64466e-11	PBX1	PBX homeobox 1 [Source:HGNC Symbol;Acc:HGNC:8632]	844.233	1354.04	884.997	1238.74	865.593	1329.33	PBX homeobox 1 [Source:HGNC Symbol;Acc:HGNC:8632]
ENSG00000101265	1359.52	0.695283	0.0959443	7.24674	4.26929e-13	1.81427e-11	RASSF2	Ras association domain family member 2 [Source:HGNC Symbol;Acc:HGNC:9883]	1007.87	1726.37	975.938	1476.92	1098.12	1871.92	Ras association domain family member 2 [Source:HGNC Symbol;Acc:HGNC:9883]
ENSG00000198728	1825.33	0.615794	0.0851498	7.23189	4.76326e-13	2.01329e-11	LDB1	LIM domain binding 1 [Source:HGNC Symbol;Acc:HGNC:6532]	1554.58	2171.74	1413.55	2093.44	1319.69	2399	LIM domain binding 1 [Source:HGNC Symbol;Acc:HGNC:6532]
ENSG00000154760	96.1613	-1.42495	0.197038	-7.23188	4.76358e-13	2.01329e-11	SLFN13	schlafen family member 13 [Source:HGNC Symbol;Acc:HGNC:26481]	130.912	45.4939	140.989	37.6068	172.875	49.091	schlafen family member 13 [Source:HGNC Symbol;Acc:HGNC:26481]
ENSG00000177409	12519.4	-0.774512	0.107147	-7.22849	4.88393e-13	2.05855e-11	SAMD9L	sterile alpha motif domain containing 9 like [Source:HGNC Symbol;Acc:HGNC:1349]	15311.5	11239.4	16641.6	7705.97	15898.4	8319.64	sterile alpha motif domain containing 9 like [Source:HGNC Symbol;Acc:HGNC:1349]
ENSG00000178685	5591.79	-0.516135	0.0714201	-7.22674	4.94711e-13	2.07953e-11	PARP10	poly(ADP-ribose) polymerase family member 10 [Source:HGNC Symbol;Acc:HGNC:25895]	7148.83	4489.53	6395.78	4437.6	6255.16	4823.84	poly(ADP-ribose) polymerase family member 10 [Source:HGNC Symbol;Acc:HGNC:25895]
ENSG00000100968	2277.15	0.559903	0.0775338	7.2214	5.14543e-13	2.15705e-11	NFATC4	nuclear factor of activated T-cells 4 [Source:HGNC Symbol;Acc:HGNC:7778]	1995.66	2606.32	1760.84	2738.46	1732.4	2829.19	nuclear factor of activated T-cells 4 [Source:HGNC Symbol;Acc:HGNC:7778]
ENSG00000137486	975.572	0.600657	0.083194	7.21996	5.20041e-13	2.17422e-11	ARRB1	arrestin beta 1 [Source:HGNC Symbol;Acc:HGNC:711]	790.678	1193.62	770.863	1115.67	746.285	1236.32	arrestin beta 1 [Source:HGNC Symbol;Acc:HGNC:711]
ENSG00000141458	4126.63	-0.44594	0.0618212	-7.21338	5.45818e-13	2.27586e-11	NPC1	NPC intracellular cholesterol transporter 1 [Source:HGNC Symbol;Acc:HGNC:7897]	4870.52	3317.46	4684.99	3566.95	4750.41	3569.43	NPC intracellular cholesterol transporter 1 [Source:HGNC Symbol;Acc:HGNC:7897]
ENSG00000106683	1533.42	0.606087	0.0840894	7.20764	5.69279e-13	2.36731e-11	LIMK1	LIM domain kinase 1 [Source:HGNC Symbol;Acc:HGNC:6613]	1259.28	1728.77	1235.33	2012.53	1123.69	1840.91	LIM domain kinase 1 [Source:HGNC Symbol;Acc:HGNC:6613]
ENSG00000243649	334.809	-1.04037	0.144368	-7.20639	5.74556e-13	2.38287e-11	CFB	complement factor B [Source:HGNC Symbol;Acc:HGNC:1037]	505.796	234.653	400.995	165.242	474.798	227.369	complement factor B [Source:HGNC Symbol;Acc:HGNC:1037]
ENSG00000114698	533.16	-0.927956	0.128785	-7.20549	5.78343e-13	2.39218e-11	PLSCR4	phospholipid scramblase 4 [Source:HGNC Symbol;Acc:HGNC:16497]	622.576	395.079	711.049	291.738	797.417	381.101	phospholipid scramblase 4 [Source:HGNC Symbol;Acc:HGNC:16497]
ENSG00000232810	51.3881	-1.69256	0.235112	-7.19895	6.06777e-13	2.50312e-11	TNF	tumor necrosis factor [Source:HGNC Symbol;Acc:HGNC:11892]	104.878	20.3525	81.1756	14.8148	75.4807	11.6268	tumor necrosis factor [Source:HGNC Symbol;Acc:HGNC:11892]
ENSG00000184009	27412.9	-0.351234	0.048801	-7.19727	6.14316e-13	2.5275e-11	ACTG1	actin gamma 1 [Source:HGNC Symbol;Acc:HGNC:144]	30289.8	24071.1	31169.6	23928.2	30831.4	24187.7	actin gamma 1 [Source:HGNC Symbol;Acc:HGNC:144]
ENSG00000167693	2295.37	-0.491414	0.0683312	-7.19165	6.40144e-13	2.62679e-11	NXN	nucleoredoxin [Source:HGNC Symbol;Acc:HGNC:18008]	2784.85	1921.52	2697.72	1955.55	2584.6	1827.99	nucleoredoxin [Source:HGNC Symbol;Acc:HGNC:18008]
ENSG00000163162	2447.46	-0.489257	0.0680712	-7.18743	6.60227e-13	2.69565e-11	RNF149	ring finger protein 149 [Source:HGNC Symbol;Acc:HGNC:23137]	2859.24	1994.55	2883.26	2153.84	2856.09	1937.8	ring finger protein 149 [Source:HGNC Symbol;Acc:HGNC:23137]
ENSG00000150540	1050.7	-0.627435	0.0873003	-7.18709	6.61883e-13	2.69565e-11	HNMT	histamine N-methyltransferase [Source:HGNC Symbol;Acc:HGNC:5028]	1213.91	878.751	1290.26	764.671	1344.04	812.586	histamine N-methyltransferase [Source:HGNC Symbol;Acc:HGNC:5028]
ENSG00000090530	5928.32	-0.447572	0.0622749	-7.18703	6.62137e-13	2.69565e-11	P3H2	prolyl 3-hydroxylase 2 [Source:HGNC Symbol;Acc:HGNC:19317]	6710.73	5180.32	6795.56	5104.27	7059.88	4719.2	prolyl 3-hydroxylase 2 [Source:HGNC Symbol;Acc:HGNC:19317]
ENSG00000187608	44505.4	-0.448532	0.0624477	-7.18252	6.84386e-13	2.77168e-11	ISG15	ISG15 ubiquitin-like modifier [Source:HGNC Symbol;Acc:HGNC:4053]	53406.9	35955.7	48154.2	37850.7	52855.9	38809	ISG15 ubiquitin-like modifier [Source:HGNC Symbol;Acc:HGNC:4053]
ENSG00000005059	640.383	-0.768132	0.106944	-7.18256	6.84169e-13	2.77168e-11	CCDC109B	mitochondrial calcium uniporter dominant negative beta subunit [Source:HGNC Symbol;Acc:HGNC:26076]	745.306	496.841	798.939	474.073	902.116	425.025	mitochondrial calcium uniporter dominant negative beta subunit [Source:HGNC Symbol;Acc:HGNC:26076]
ENSG00000166750	3629.43	-0.617872	0.0860393	-7.18128	6.90629e-13	2.78967e-11	SLFN5	schlafen family member 5 [Source:HGNC Symbol;Acc:HGNC:28286]	4586.38	3106.75	4661.19	2564.1	3999.26	2858.91	schlafen family member 5 [Source:HGNC Symbol;Acc:HGNC:28286]
ENSG00000137393	289.707	-1.07601	0.149865	-7.17988	6.97711e-13	2.81096e-11	RNF144B	ring finger protein 144B [Source:HGNC Symbol;Acc:HGNC:21578]	403.893	227.469	388.178	144.729	416.361	157.608	ring finger protein 144B [Source:HGNC Symbol;Acc:HGNC:21578]
ENSG00000086696	2342.16	0.701477	0.0977612	7.17541	7.20916e-13	2.89692e-11	HSD17B2	hydroxysteroid 17-beta dehydrogenase 2 [Source:HGNC Symbol;Acc:HGNC:5211]	1901.2	2494.98	1703.47	3305.98	1682.49	2964.84	hydroxysteroid 17-beta dehydrogenase 2 [Source:HGNC Symbol;Acc:HGNC:5211]
ENSG00000110047	4191	-0.587683	0.0819242	-7.17349	7.31071e-13	2.93014e-11	EHD1	EH domain containing 1 [Source:HGNC Symbol;Acc:HGNC:3242]	5524.34	3271.97	4854.67	3630.76	4785.72	3078.52	EH domain containing 1 [Source:HGNC Symbol;Acc:HGNC:3242]
ENSG00000156273	3064.37	-0.651757	0.0909328	-7.16746	7.64023e-13	3.05432e-11	BACH1	BTB domain and CNC homolog 1 [Source:HGNC Symbol;Acc:HGNC:935]	4057.53	2653.01	3693.8	2074.07	3547.59	2360.24	BTB domain and CNC homolog 1 [Source:HGNC Symbol;Acc:HGNC:935]
ENSG00000131737	535.519	-0.982611	0.13716	-7.16398	7.83695e-13	3.12491e-11	KRT34	keratin 34 [Source:HGNC Symbol;Acc:HGNC:6452]	774.314	360.36	612.174	402.279	790.112	273.876	keratin 34 [Source:HGNC Symbol;Acc:HGNC:6452]
ENSG00000058091	361.294	0.846098	0.118174	7.15974	8.08295e-13	3.21474e-11	CDK14	cyclin dependent kinase 14 [Source:HGNC Symbol;Acc:HGNC:8883]	249.923	477.686	269.772	501.424	236.181	432.776	cyclin dependent kinase 14 [Source:HGNC Symbol;Acc:HGNC:8883]
ENSG00000117862	1137.75	0.606941	0.0847998	7.15734	8.22584e-13	3.25487e-11	TXNDC12	thioredoxin domain containing 12 [Source:HGNC Symbol;Acc:HGNC:24626]	862.085	1336.08	865.466	1466.66	962.987	1333.21	thioredoxin domain containing 12 [Source:HGNC Symbol;Acc:HGNC:24626]
ENSG00000133657	3471.56	-0.493921	0.0690089	-7.15735	8.22493e-13	3.25487e-11	ATP13A3	ATPase 13A3 [Source:HGNC Symbol;Acc:HGNC:24113]	4011.41	2943.93	4292.54	2961.82	3906.73	2712.93	ATPase 13A3 [Source:HGNC Symbol;Acc:HGNC:24113]
ENSG00000134324	2274.15	-0.721577	0.100945	-7.14821	8.79175e-13	3.46994e-11	LPIN1	lipin 1 [Source:HGNC Symbol;Acc:HGNC:13345]	2645.02	1903.56	3249.47	1508.83	2663.74	1674.26	lipin 1 [Source:HGNC Symbol;Acc:HGNC:13345]
ENSG00000127920	3294.41	0.554027	0.077557	7.14348	9.09959e-13	3.58233e-11	GNG11	G protein subunit gamma 11 [Source:HGNC Symbol;Acc:HGNC:4403]	2708.24	3506.62	2627.53	4143.58	2628.43	4152.07	G protein subunit gamma 11 [Source:HGNC Symbol;Acc:HGNC:4403]
ENSG00000185507	4755.23	-0.449173	0.0628847	-7.1428	9.14462e-13	3.59094e-11	IRF7	interferon regulatory factor 7 [Source:HGNC Symbol;Acc:HGNC:6122]	5766.82	3937.62	5442.43	3945.29	5289.73	4149.48	interferon regulatory factor 7 [Source:HGNC Symbol;Acc:HGNC:6122]
ENSG00000196517	2316.88	-0.697868	0.0977786	-7.13723	9.52327e-13	3.73019e-11	SLC6A9	solute carrier family 6 member 9 [Source:HGNC Symbol;Acc:HGNC:11056]	3021.39	1882.01	2708.09	1455.27	2931.57	1902.92	solute carrier family 6 member 9 [Source:HGNC Symbol;Acc:HGNC:11056]
ENSG00000151466	404.34	-0.815298	0.114488	-7.12125	1.06956e-12	4.17882e-11	SCLT1	sodium channel and clathrin linker 1 [Source:HGNC Symbol;Acc:HGNC:26406]	490.176	311.274	548.088	268.946	525.93	281.627	sodium channel and clathrin linker 1 [Source:HGNC Symbol;Acc:HGNC:26406]
ENSG00000221852	351.813	-0.936531	0.13155	-7.11918	1.08573e-12	4.23133e-11	KRTAP1-5	keratin associated protein 1-5 [Source:HGNC Symbol;Acc:HGNC:16777]	473.812	235.85	516.35	263.248	418.796	202.823	keratin associated protein 1-5 [Source:HGNC Symbol;Acc:HGNC:16777]
ENSG00000133216	2411.98	-0.506832	0.0712016	-7.11827	1.0929e-12	4.24863e-11	EPHB2	EPH receptor B2 [Source:HGNC Symbol;Acc:HGNC:3393]	2974.53	2030.46	2778.28	2055.84	2766	1866.75	EPH receptor B2 [Source:HGNC Symbol;Acc:HGNC:3393]
ENSG00000138867	2085.31	-0.461799	0.0649073	-7.11474	1.12124e-12	4.3479e-11	GUCD1	guanylyl cyclase domain containing 1 [Source:HGNC Symbol;Acc:HGNC:14237]	2458.32	1747.92	2393.15	1721.94	2412.95	1777.61	guanylyl cyclase domain containing 1 [Source:HGNC Symbol;Acc:HGNC:14237]
ENSG00000173039	2959.61	-0.495263	0.0696462	-7.11112	1.15101e-12	4.45221e-11	RELA	RELA proto-oncogene, NF-kB subunit [Source:HGNC Symbol;Acc:HGNC:9955]	3675.2	2460.26	3279.98	2365.81	3461.15	2515.27	RELA proto-oncogene, NF-kB subunit [Source:HGNC Symbol;Acc:HGNC:9955]
ENSG00000109089	409.973	0.888328	0.124986	7.10742	1.18233e-12	4.56196e-11	CDR2L	cerebellar degeneration related protein 2 like [Source:HGNC Symbol;Acc:HGNC:29999]	296.04	487.264	281.978	630.199	260.53	503.829	cerebellar degeneration related protein 2 like [Source:HGNC Symbol;Acc:HGNC:29999]
ENSG00000231925	11494.8	-0.424199	0.0597728	-7.09685	1.27635e-12	4.91254e-11	TAPBP	TAP binding protein [Source:HGNC Symbol;Acc:HGNC:11566]	13989.7	9724.92	12801.3	9682.04	12794	9977.11	TAP binding protein [Source:HGNC Symbol;Acc:HGNC:11566]
ENSG00000136244	5501.8	-0.86382	0.121731	-7.09616	1.28274e-12	4.92491e-11	IL6	interleukin 6 [Source:HGNC Symbol;Acc:HGNC:6018]	8031.75	3859.8	5257.49	3701.42	8304.09	3856.23	interleukin 6 [Source:HGNC Symbol;Acc:HGNC:6018]
ENSG00000015676	1387.73	0.513827	0.072566	7.08083	1.43299e-12	5.48817e-11	NUDCD3	NudC domain containing 3 [Source:HGNC Symbol;Acc:HGNC:22208]	1117.21	1585.1	1151.72	1642.16	1145.6	1684.6	NudC domain containing 3 [Source:HGNC Symbol;Acc:HGNC:22208]
ENSG00000110218	2376.62	-0.4996	0.0705631	-7.08019	1.43957e-12	5.4998e-11	PANX1	pannexin 1 [Source:HGNC Symbol;Acc:HGNC:8599]	2915.02	1996.94	2693.44	2030.77	2768.44	1855.12	pannexin 1 [Source:HGNC Symbol;Acc:HGNC:8599]
ENSG00000112936	809.597	-0.967666	0.136757	-7.07581	1.48576e-12	5.6623e-11	C7	complement C7 [Source:HGNC Symbol;Acc:HGNC:1346]	930.516	541.138	1060.17	414.814	1284.39	626.557	complement C7 [Source:HGNC Symbol;Acc:HGNC:1346]
ENSG00000107731	954.933	0.732547	0.103552	7.07422	1.50289e-12	5.71358e-11	UNC5B	unc-5 netrin receptor B [Source:HGNC Symbol;Acc:HGNC:12568]	797.373	1118.19	707.387	1287.75	613.585	1205.31	unc-5 netrin receptor B [Source:HGNC Symbol;Acc:HGNC:12568]
ENSG00000077522	158.715	-1.1104	0.157045	-7.0706	1.5426e-12	5.85019e-11	ACTN2	actinin alpha 2 [Source:HGNC Symbol;Acc:HGNC:164]	217.939	100.565	223.996	96.866	227.659	85.2634	actinin alpha 2 [Source:HGNC Symbol;Acc:HGNC:164]
ENSG00000205413	9695.98	-0.746031	0.105567	-7.06693	1.58403e-12	5.99265e-11	SAMD9	sterile alpha motif domain containing 9 [Source:HGNC Symbol;Acc:HGNC:1348]	11738.9	8745.6	12923.4	6069.51	12107.3	6591.12	sterile alpha motif domain containing 9 [Source:HGNC Symbol;Acc:HGNC:1348]
ENSG00000158683	74.0327	-1.51923	0.215027	-7.06526	1.60316e-12	6.05026e-11	PKD1L1	polycystin 1 like 1, transient receptor potential channel interacting [Source:HGNC Symbol;Acc:HGNC:18053]	121.986	19.1553	119.017	30.7692	113.221	40.0479	polycystin 1 like 1, transient receptor potential channel interacting [Source:HGNC Symbol;Acc:HGNC:18053]
ENSG00000077380	1123.34	-0.559496	0.0792051	-7.06389	1.61909e-12	6.09555e-11	DYNC1I2	dynein cytoplasmic 1 intermediate chain 2 [Source:HGNC Symbol;Acc:HGNC:2964]	1324.74	938.611	1314.07	869.515	1393.96	899.141	dynein cytoplasmic 1 intermediate chain 2 [Source:HGNC Symbol;Acc:HGNC:2964]
ENSG00000184867	916.169	0.592061	0.0838658	7.05962	1.6696e-12	6.27051e-11	ARMCX2	armadillo repeat containing, X-linked 2 [Source:HGNC Symbol;Acc:HGNC:16869]	710.346	1167.28	723.256	1091.74	745.067	1059.33	armadillo repeat containing, X-linked 2 [Source:HGNC Symbol;Acc:HGNC:16869]
ENSG00000110002	3143.48	0.599129	0.0849033	7.05661	1.70619e-12	6.39245e-11	VWA5A	von Willebrand factor A domain containing 5A [Source:HGNC Symbol;Acc:HGNC:6658]	2623.45	3345	2391.32	3938.46	2429.99	4132.69	von Willebrand factor A domain containing 5A [Source:HGNC Symbol;Acc:HGNC:6658]
ENSG00000132274	11566.4	-0.569905	0.0808919	-7.04527	1.851e-12	6.9183e-11	TRIM22	tripartite motif containing 22 [Source:HGNC Symbol;Acc:HGNC:16379]	13822.4	10092.5	13453.2	8056.97	14362	9611.51	tripartite motif containing 22 [Source:HGNC Symbol;Acc:HGNC:16379]
ENSG00000077943	4483.44	0.601669	0.0854569	7.04062	1.91387e-12	7.13607e-11	ITGA8	integrin subunit alpha 8 [Source:HGNC Symbol;Acc:HGNC:6144]	3626.11	5999.21	3690.13	4801.13	3285.84	5498.19	integrin subunit alpha 8 [Source:HGNC Symbol;Acc:HGNC:6144]
ENSG00000120539	1254.86	-0.66951	0.0951742	-7.03458	1.99861e-12	7.43418e-11	MASTL	microtubule associated serine/threonine kinase like [Source:HGNC Symbol;Acc:HGNC:19042]	1523.34	1045.16	1506.33	823.931	1624.05	1006.37	microtubule associated serine/threonine kinase like [Source:HGNC Symbol;Acc:HGNC:19042]
ENSG00000124570	2292.21	0.505179	0.0718515	7.03088	2.05239e-12	7.61594e-11	SERPINB6	serpin family B member 6 [Source:HGNC Symbol;Acc:HGNC:8950]	1860.29	2532.09	1827.37	2764.67	1977.11	2791.73	serpin family B member 6 [Source:HGNC Symbol;Acc:HGNC:8950]
ENSG00000163644	2224.88	-0.618979	0.0880525	-7.02967	2.07028e-12	7.664e-11	PPM1K	protein phosphatase, Mg2+/Mn2+ dependent 1K [Source:HGNC Symbol;Acc:HGNC:25415]	2676.26	1817.36	2836.87	1512.25	2611.39	1895.17	protein phosphatase, Mg2+/Mn2+ dependent 1K [Source:HGNC Symbol;Acc:HGNC:25415]
ENSG00000155363	6250.13	-0.453394	0.0645305	-7.02604	2.12476e-12	7.84695e-11	MOV10	Mov10 RISC complex RNA helicase [Source:HGNC Symbol;Acc:HGNC:7200]	7619.67	5444.9	7264.91	5094.01	6831	5246.28	Mov10 RISC complex RNA helicase [Source:HGNC Symbol;Acc:HGNC:7200]
ENSG00000106588	258.273	-0.956465	0.136183	-7.02338	2.16567e-12	7.97902e-11	PSMA2	proteasome subunit alpha 2 [Source:HGNC Symbol;Acc:HGNC:9531]	357.033	193.948	329.585	157.265	355.49	156.316	proteasome subunit alpha 2 [Source:HGNC Symbol;Acc:HGNC:9531]
ENSG00000099968	3378.14	-0.494301	0.0704205	-7.01928	2.23011e-12	8.19697e-11	BCL2L13	BCL2 like 13 [Source:HGNC Symbol;Acc:HGNC:17164]	4096.95	2937.95	4000.19	2602.85	3786.21	2844.7	BCL2 like 13 [Source:HGNC Symbol;Acc:HGNC:17164]
ENSG00000013583	1952.92	-0.470482	0.0670704	-7.01475	2.30367e-12	8.44732e-11	HEBP1	heme binding protein 1 [Source:HGNC Symbol;Acc:HGNC:17176]	2279.8	1650.95	2224.09	1655.84	2320.42	1586.42	heme binding protein 1 [Source:HGNC Symbol;Acc:HGNC:17176]
ENSG00000168310	1355.02	-0.634745	0.0905014	-7.01364	2.32191e-12	8.49412e-11	IRF2	interferon regulatory factor 2 [Source:HGNC Symbol;Acc:HGNC:6117]	1630.45	1071.5	1552.71	950.426	1792.06	1132.97	interferon regulatory factor 2 [Source:HGNC Symbol;Acc:HGNC:6117]
ENSG00000163346	2390.65	0.582151	0.0831909	6.99778	2.60059e-12	9.473e-11	PBXIP1	PBX homeobox interacting protein 1 [Source:HGNC Symbol;Acc:HGNC:21199]	2101.29	2692.52	1831.03	2920.79	1770.14	3028.14	PBX homeobox interacting protein 1 [Source:HGNC Symbol;Acc:HGNC:21199]
ENSG00000147416	2201.83	-0.448356	0.0640718	-6.99772	2.6017e-12	9.473e-11	ATP6V1B2	ATPase H+ transporting V1 subunit B2 [Source:HGNC Symbol;Acc:HGNC:854]	2576.59	1868.84	2571.99	1855.27	2489.64	1848.66	ATPase H+ transporting V1 subunit B2 [Source:HGNC Symbol;Acc:HGNC:854]
ENSG00000132670	3494.18	-0.494797	0.0707238	-6.99618	2.63028e-12	9.55464e-11	PTPRA	protein tyrosine phosphatase, receptor type A [Source:HGNC Symbol;Acc:HGNC:9664]	4162.41	2987.03	3812.81	2778.34	4325.53	2898.95	protein tyrosine phosphatase, receptor type A [Source:HGNC Symbol;Acc:HGNC:9664]
ENSG00000108691	751.736	-0.816869	0.11678	-6.99493	2.65389e-12	9.61787e-11	CCL2	C-C motif chemokine ligand 2 [Source:HGNC Symbol;Acc:HGNC:10618]	1022.01	512.405	797.718	551.566	1094.47	532.25	C-C motif chemokine ligand 2 [Source:HGNC Symbol;Acc:HGNC:10618]
ENSG00000144596	1520.96	-0.615459	0.0880385	-6.99079	2.73339e-12	9.88291e-11	GRIP2	glutamate receptor interacting protein 2 [Source:HGNC Symbol;Acc:HGNC:23841]	1983.02	1212.77	1732.15	1080.34	1834.67	1282.83	glutamate receptor interacting protein 2 [Source:HGNC Symbol;Acc:HGNC:23841]
ENSG00000138032	1362.77	-0.522354	0.0748347	-6.98011	2.94952e-12	1.06395e-10	PPM1B	protein phosphatase, Mg2+/Mn2+ dependent 1B [Source:HGNC Symbol;Acc:HGNC:9276]	1576.15	1149.32	1635.72	1060.97	1624.05	1130.39	protein phosphatase, Mg2+/Mn2+ dependent 1B [Source:HGNC Symbol;Acc:HGNC:9276]
ENSG00000145555	8002.34	-0.44464	0.0637491	-6.97484	3.06216e-12	1.10202e-10	MYO10	myosin X [Source:HGNC Symbol;Acc:HGNC:7593]	9457.65	7095.85	9055.66	6299.71	9220.82	6884.37	myosin X [Source:HGNC Symbol;Acc:HGNC:7593]
ENSG00000154642	1586.53	-0.79311	0.113791	-6.96989	3.17182e-12	1.13884e-10	C21orf91	chromosome 21 open reading frame 91 [Source:HGNC Symbol;Acc:HGNC:16459]	2035.83	1383.97	2130.1	927.634	1934.5	1107.13	chromosome 21 open reading frame 91 [Source:HGNC Symbol;Acc:HGNC:16459]
ENSG00000105854	1197.23	-0.56353	0.080857	-6.96946	3.18156e-12	1.1397e-10	PON2	paraoxonase 2 [Source:HGNC Symbol;Acc:HGNC:9205]	1365.65	1008.05	1431.25	933.332	1507.18	937.897	paraoxonase 2 [Source:HGNC Symbol;Acc:HGNC:9205]
ENSG00000105402	2360.22	-0.45391	0.0651636	-6.9657	3.26767e-12	1.16785e-10	NAPA	NSF attachment protein alpha [Source:HGNC Symbol;Acc:HGNC:7641]	2754.36	2053.21	2676.35	1971.51	2774.52	1931.34	NSF attachment protein alpha [Source:HGNC Symbol;Acc:HGNC:7641]
ENSG00000016864	1036.98	0.587259	0.0844087	6.95733	3.4678e-12	1.23653e-10	GLT8D1	glycosyltransferase 8 domain containing 1 [Source:HGNC Symbol;Acc:HGNC:24870]	760.182	1279.82	838.611	1235.33	872.897	1235.03	glycosyltransferase 8 domain containing 1 [Source:HGNC Symbol;Acc:HGNC:24870]
ENSG00000122417	722.127	-0.759915	0.10924	-6.95637	3.49144e-12	1.2421e-10	ODF2L	outer dense fiber of sperm tails 2 like [Source:HGNC Symbol;Acc:HGNC:29225]	818.2	587.829	930.773	478.632	1003.16	514.164	outer dense fiber of sperm tails 2 like [Source:HGNC Symbol;Acc:HGNC:29225]
ENSG00000137166	485.668	0.716269	0.103018	6.95287	3.57924e-12	1.27042e-10	FOXP4	forkhead box P4 [Source:HGNC Symbol;Acc:HGNC:20842]	380.835	589.026	363.154	638.176	342.098	600.719	forkhead box P4 [Source:HGNC Symbol;Acc:HGNC:20842]
ENSG00000049323	4697.07	0.697665	0.100367	6.95116	3.62304e-12	1.28304e-10	LTBP1	latent transforming growth factor beta binding protein 1 [Source:HGNC Symbol;Acc:HGNC:6714]	3994.3	5541.88	3705.39	6332.76	2909.66	5698.43	latent transforming growth factor beta binding protein 1 [Source:HGNC Symbol;Acc:HGNC:6714]
ENSG00000134326	6847.34	-0.367476	0.0528819	-6.949	3.67876e-12	1.2998e-10	CMPK2	cytidine/uridine monophosphate kinase 2 [Source:HGNC Symbol;Acc:HGNC:27015]	7709.67	6031.53	7796.52	5955.55	7664.94	5925.8	cytidine/uridine monophosphate kinase 2 [Source:HGNC Symbol;Acc:HGNC:27015]
ENSG00000126790	628.068	-0.678414	0.0977569	-6.93981	3.92628e-12	1.3841e-10	L3HYPDH	trans-L-3-hydroxyproline dehydratase [Source:HGNC Symbol;Acc:HGNC:20488]	798.86	505.222	809.315	469.515	725.588	459.905	trans-L-3-hydroxyproline dehydratase [Source:HGNC Symbol;Acc:HGNC:20488]
ENSG00000188487	89.0796	1.42655	0.205688	6.93552	4.04718e-12	1.42349e-10	INSC	inscuteable homolog (Drosophila) [Source:HGNC Symbol;Acc:HGNC:33116]	46.1167	119.721	39.0619	176.638	34.088	118.852	inscuteable homolog (Drosophila) [Source:HGNC Symbol;Acc:HGNC:33116]
ENSG00000101347	9505.73	-0.499597	0.0720676	-6.93233	4.13953e-12	1.45268e-10	SAMHD1	SAM and HD domain containing deoxynucleoside triphosphate triphosphohydrolase 1 [Source:HGNC Symbol;Acc:HGNC:15925]	11351.4	8430.74	11540.4	7164.66	10608.7	7938.54	SAM and HD domain containing deoxynucleoside triphosphate triphosphohydrolase 1 [Source:HGNC Symbol;Acc:HGNC:15925]
ENSG00000100911	3718.47	-0.410477	0.0592708	-6.92545	4.34579e-12	1.52161e-10	PSME2	proteasome activator subunit 2 [Source:HGNC Symbol;Acc:HGNC:9569]	4383.32	3189.36	4204.65	3173.79	4163.61	3196.08	proteasome activator subunit 2 [Source:HGNC Symbol;Acc:HGNC:9569]
ENSG00000152990	484.819	0.759415	0.109751	6.91945	4.53408e-12	1.58397e-10	GPR125	adhesion G protein-coupled receptor A3 [Source:HGNC Symbol;Acc:HGNC:13839]	388.273	584.237	354.609	643.874	316.532	621.389	adhesion G protein-coupled receptor A3 [Source:HGNC Symbol;Acc:HGNC:13839]
ENSG00000101109	1481.34	-0.543472	0.0786085	-6.91365	4.7234e-12	1.6464e-10	STK4	serine/threonine kinase 4 [Source:HGNC Symbol;Acc:HGNC:11408]	1780.7	1176.86	1702.86	1130.48	1807.88	1289.29	serine/threonine kinase 4 [Source:HGNC Symbol;Acc:HGNC:11408]
ENSG00000115652	1218.34	-0.531693	0.0769422	-6.91029	4.83666e-12	1.6821e-10	UXS1	UDP-glucuronate decarboxylase 1 [Source:HGNC Symbol;Acc:HGNC:17729]	1444.49	1037.98	1415.39	974.358	1477.96	959.859	UDP-glucuronate decarboxylase 1 [Source:HGNC Symbol;Acc:HGNC:17729]
ENSG00000146409	607.765	-0.712588	0.103224	-6.90333	5.0797e-12	1.75873e-10	SLC18B1	solute carrier family 18 member B1 [Source:HGNC Symbol;Acc:HGNC:21573]	763.901	446.559	698.232	433.048	822.983	481.867	solute carrier family 18 member B1 [Source:HGNC Symbol;Acc:HGNC:21573]
ENSG00000120802	1025.21	-0.594882	0.0861712	-6.90349	5.07386e-12	1.75873e-10	TMPO	thymopoietin [Source:HGNC Symbol;Acc:HGNC:11875]	1161.84	846.426	1248.76	770.369	1309.95	813.878	thymopoietin [Source:HGNC Symbol;Acc:HGNC:11875]
ENSG00000133687	5447.56	-0.392089	0.0568419	-6.89788	5.27825e-12	1.82341e-10	TMTC1	transmembrane and tetratricopeptide repeat containing 1 [Source:HGNC Symbol;Acc:HGNC:24099]	6085.92	4779.25	6312.78	4570.93	6177.24	4759.25	transmembrane and tetratricopeptide repeat containing 1 [Source:HGNC Symbol;Acc:HGNC:24099]
ENSG00000170775	2651.29	-0.514296	0.0746045	-6.89363	5.43862e-12	1.87463e-10	GPR37	G protein-coupled receptor 37 [Source:HGNC Symbol;Acc:HGNC:4494]	3143.37	2168.14	3333.69	2086.61	2904.79	2271.11	G protein-coupled receptor 37 [Source:HGNC Symbol;Acc:HGNC:4494]
ENSG00000170852	1316.12	-0.525343	0.0762472	-6.89	5.57926e-12	1.91885e-10	KBTBD2	kelch repeat and BTB domain containing 2 [Source:HGNC Symbol;Acc:HGNC:21751]	1553.84	1091.85	1590.55	1016.52	1529.09	1114.88	kelch repeat and BTB domain containing 2 [Source:HGNC Symbol;Acc:HGNC:21751]
ENSG00000077157	623.626	-0.657859	0.0955419	-6.88556	5.75613e-12	1.97138e-10	PPP1R12B	protein phosphatase 1 regulatory subunit 12B [Source:HGNC Symbol;Acc:HGNC:7619]	759.438	475.292	772.084	449.002	773.068	512.872	protein phosphatase 1 regulatory subunit 12B [Source:HGNC Symbol;Acc:HGNC:7619]
ENSG00000105559	6985.03	-0.603056	0.0875832	-6.88553	5.75744e-12	1.97138e-10	PLEKHA4	pleckstrin homology domain containing A4 [Source:HGNC Symbol;Acc:HGNC:14339]	9442.02	5783.71	8459.35	5024.5	7495.72	5704.89	pleckstrin homology domain containing A4 [Source:HGNC Symbol;Acc:HGNC:14339]
ENSG00000176678	490.058	-0.779478	0.113217	-6.8848	5.78708e-12	1.97717e-10	FOXL1	forkhead box L1 [Source:HGNC Symbol;Acc:HGNC:3817]	677.618	345.993	595.695	394.301	605.063	321.675	forkhead box L1 [Source:HGNC Symbol;Acc:HGNC:3817]
ENSG00000152127	2890.45	0.544027	0.0790972	6.87795	6.07181e-12	2.06989e-10	MGAT5	mannosyl (alpha-1,6-)-glycoprotein beta-1,6-N-acetyl-glucosaminyltransferase [Source:HGNC Symbol;Acc:HGNC:7049]	2465.01	3208.52	2416.35	3634.18	2129.29	3489.34	mannosyl (alpha-1,6-)-glycoprotein beta-1,6-N-acetyl-glucosaminyltransferase [Source:HGNC Symbol;Acc:HGNC:7049]
ENSG00000065325	106.195	1.36624	0.198753	6.87409	6.2387e-12	2.12212e-10	GLP2R	glucagon like peptide 2 receptor [Source:HGNC Symbol;Acc:HGNC:4325]	66.1998	135.284	40.2826	172.08	45.0449	178.278	glucagon like peptide 2 receptor [Source:HGNC Symbol;Acc:HGNC:4325]
ENSG00000204516	2131.74	-0.543678	0.0791829	-6.86611	6.59778e-12	2.23935e-10	MICB	MHC class I polypeptide-related sequence B [Source:HGNC Symbol;Acc:HGNC:7091]	2526.75	1824.54	2363.86	1635.33	2728.26	1711.73	MHC class I polypeptide-related sequence B [Source:HGNC Symbol;Acc:HGNC:7091]
ENSG00000181381	11239.5	-0.701699	0.10222	-6.86462	6.66702e-12	2.25791e-10	DDX60L	DEAD-box helicase 60-like [Source:HGNC Symbol;Acc:HGNC:26429]	13945.1	10149.9	14269.8	6962.95	13877.5	8231.79	DEAD-box helicase 60-like [Source:HGNC Symbol;Acc:HGNC:26429]
ENSG00000197355	913.965	0.641141	0.0934288	6.86235	6.77367e-12	2.28903e-10	UAP1L1	UDP-N-acetylglucosamine pyrophosphorylase 1 like 1 [Source:HGNC Symbol;Acc:HGNC:28082]	743.818	1043.97	701.284	1236.47	675.674	1082.59	UDP-N-acetylglucosamine pyrophosphorylase 1 like 1 [Source:HGNC Symbol;Acc:HGNC:28082]
ENSG00000109501	2335.58	0.464447	0.0677181	6.85854	6.95691e-12	2.34584e-10	WFS1	wolframin ER transmembrane glycoprotein [Source:HGNC Symbol;Acc:HGNC:12762]	1994.92	2629.07	1964.69	2855.84	1907.71	2661.25	wolframin ER transmembrane glycoprotein [Source:HGNC Symbol;Acc:HGNC:12762]
ENSG00000181104	9608.43	0.433274	0.0631838	6.85736	7.0143e-12	2.36006e-10	F2R	coagulation factor II thrombin receptor [Source:HGNC Symbol;Acc:HGNC:3537]	8068.19	11617.7	8257.33	10280.3	8136.09	11290.9	coagulation factor II thrombin receptor [Source:HGNC Symbol;Acc:HGNC:3537]
ENSG00000135472	79.1267	1.36212	0.198722	6.85442	7.16e-12	2.40387e-10	FAIM2	Fas apoptotic inhibitory molecule 2 [Source:HGNC Symbol;Acc:HGNC:17067]	34.2156	122.115	37.2309	109.402	42.6101	129.187	Fas apoptotic inhibitory molecule 2 [Source:HGNC Symbol;Acc:HGNC:17067]
ENSG00000146067	912.659	0.63148	0.0921774	6.8507	7.34891e-12	2.46196e-10	FAM193B	family with sequence similarity 193 member B [Source:HGNC Symbol;Acc:HGNC:25524]	717.04	1031.99	721.425	1082.62	687.848	1235.03	family with sequence similarity 193 member B [Source:HGNC Symbol;Acc:HGNC:25524]
ENSG00000112343	4197.36	-0.602849	0.0880034	-6.85029	7.37015e-12	2.46376e-10	TRIM38	tripartite motif containing 38 [Source:HGNC Symbol;Acc:HGNC:10059]	5256.56	3664.65	5294.72	2890.02	4709.02	3369.19	tripartite motif containing 38 [Source:HGNC Symbol;Acc:HGNC:10059]
ENSG00000102921	2389.86	-0.469474	0.0685703	-6.84661	7.56193e-12	2.52243e-10	N4BP1	NEDD4 binding protein 1 [Source:HGNC Symbol;Acc:HGNC:29850]	2829.48	2121.45	2747.76	1921.37	2769.65	1949.43	NEDD4 binding protein 1 [Source:HGNC Symbol;Acc:HGNC:29850]
ENSG00000116774	1317.35	-0.652611	0.0953452	-6.84471	7.66287e-12	2.55062e-10	OLFML3	olfactomedin like 3 [Source:HGNC Symbol;Acc:HGNC:24956]	1611.85	1043.97	1448.34	939.03	1805.45	1055.46	olfactomedin like 3 [Source:HGNC Symbol;Acc:HGNC:24956]
ENSG00000164251	114.337	1.30458	0.190794	6.83761	8.05239e-12	2.67453e-10	F2RL1	F2R like trypsin receptor 1 [Source:HGNC Symbol;Acc:HGNC:3538]	65.456	131.693	57.9826	194.872	48.6972	187.321	F2R like trypsin receptor 1 [Source:HGNC Symbol;Acc:HGNC:3538]
ENSG00000163531	947.91	-0.797686	0.116812	-6.82881	8.56206e-12	2.83774e-10	NFASC	neurofascin [Source:HGNC Symbol;Acc:HGNC:29866]	1135.07	693.183	1107.16	578.917	1412.22	760.911	neurofascin [Source:HGNC Symbol;Acc:HGNC:29866]
ENSG00000110435	838.411	-0.595133	0.0871798	-6.82649	8.70147e-12	2.87779e-10	PDHX	pyruvate dehydrogenase complex component X [Source:HGNC Symbol;Acc:HGNC:21350]	1039.11	672.831	1049.79	665.526	950.813	652.394	pyruvate dehydrogenase complex component X [Source:HGNC Symbol;Acc:HGNC:21350]
ENSG00000154640	731.894	-0.703778	0.103321	-6.81159	9.65289e-12	3.18566e-10	BTG3	BTG anti-proliferation factor 3 [Source:HGNC Symbol;Acc:HGNC:1132]	834.564	510.011	889.88	570.939	1021.42	564.547	BTG anti-proliferation factor 3 [Source:HGNC Symbol;Acc:HGNC:1132]
ENSG00000106025	674.469	0.750484	0.110294	6.80439	1.01476e-11	3.34182e-10	TSPAN12	tetraspanin 12 [Source:HGNC Symbol;Acc:HGNC:21641]	444.803	804.524	511.467	787.463	528.365	970.194	tetraspanin 12 [Source:HGNC Symbol;Acc:HGNC:21641]
ENSG00000145016	2150.57	-0.561782	0.0825987	-6.80134	1.03651e-11	3.40621e-10	KIAA0226	RUN and cysteine rich domain containing beclin 1 interacting protein [Source:HGNC Symbol;Acc:HGNC:28991]	2806.43	1831.73	2485.32	1603.42	2431.21	1745.32	RUN and cysteine rich domain containing beclin 1 interacting protein [Source:HGNC Symbol;Acc:HGNC:28991]
ENSG00000152495	400.94	0.752817	0.110732	6.79858	1.05657e-11	3.46478e-10	CAMK4	calcium/calmodulin dependent protein kinase IV [Source:HGNC Symbol;Acc:HGNC:1464]	281.907	524.377	311.885	520.797	286.096	480.575	calcium/calmodulin dependent protein kinase IV [Source:HGNC Symbol;Acc:HGNC:1464]
ENSG00000177732	902.163	0.632968	0.0931988	6.79159	1.10906e-11	3.62926e-10	SOX12	SRY-box 12 [Source:HGNC Symbol;Acc:HGNC:11198]	734.892	1063.12	740.956	1111.11	620.889	1142.01	SRY-box 12 [Source:HGNC Symbol;Acc:HGNC:11198]
ENSG00000135148	4015.42	-0.507895	0.074797	-6.79032	1.11886e-11	3.64813e-10	TRAFD1	TRAF-type zinc finger domain containing 1 [Source:HGNC Symbol;Acc:HGNC:24808]	4781.26	3468.31	4531.8	2982.33	4878.24	3450.58	TRAF-type zinc finger domain containing 1 [Source:HGNC Symbol;Acc:HGNC:24808]
ENSG00000109084	299.88	-0.933172	0.137429	-6.79023	1.11953e-11	3.64813e-10	TMEM97	transmembrane protein 97 [Source:HGNC Symbol;Acc:HGNC:28106]	348.851	225.075	426.019	183.476	428.535	187.321	transmembrane protein 97 [Source:HGNC Symbol;Acc:HGNC:28106]
ENSG00000165949	13358.3	-0.450797	0.066455	-6.78349	1.17308e-11	3.81129e-10	IFI27	interferon alpha inducible protein 27 [Source:HGNC Symbol;Acc:HGNC:5397]	16465.9	10835.9	15582.1	11563.5	14338.9	11363.3	interferon alpha inducible protein 27 [Source:HGNC Symbol;Acc:HGNC:5397]
ENSG00000132613	606.914	0.654105	0.0964286	6.78331	1.17452e-11	3.81129e-10	MTSS1L	MTSS1L, I-BAR domain containing [Source:HGNC Symbol;Acc:HGNC:25094]	499.102	723.114	458.368	756.694	440.71	763.495	MTSS1L, I-BAR domain containing [Source:HGNC Symbol;Acc:HGNC:25094]
ENSG00000163840	8781.14	-0.527837	0.0778325	-6.78171	1.18762e-11	3.84576e-10	DTX3L	deltex E3 ubiquitin ligase 3L [Source:HGNC Symbol;Acc:HGNC:30323]	10471.5	7824.95	10703.6	6345.29	10043.8	7297.77	deltex E3 ubiquitin ligase 3L [Source:HGNC Symbol;Acc:HGNC:30323]
ENSG00000170801	342.956	0.833791	0.122959	6.78103	1.19326e-11	3.84794e-10	HTRA3	HtrA serine peptidase 3 [Source:HGNC Symbol;Acc:HGNC:30406]	252.898	403.459	250.851	466.096	215.485	468.948	HtrA serine peptidase 3 [Source:HGNC Symbol;Acc:HGNC:30406]
ENSG00000137752	3304.73	-0.513873	0.0757783	-6.78127	1.19128e-11	3.84794e-10	CASP1	caspase 1 [Source:HGNC Symbol;Acc:HGNC:1499]	3636.53	2764.35	3914.13	2518.52	4151.44	2843.4	caspase 1 [Source:HGNC Symbol;Acc:HGNC:1499]
ENSG00000160752	1259.05	-0.648746	0.0957194	-6.77758	1.22202e-11	3.93253e-10	FDPS	farnesyl diphosphate synthase [Source:HGNC Symbol;Acc:HGNC:3631]	1518.13	1116.99	1619.85	888.888	1503.53	906.892	farnesyl diphosphate synthase [Source:HGNC Symbol;Acc:HGNC:3631]
ENSG00000165434	166.9	1.04944	0.15485	6.77711	1.22607e-11	3.93739e-10	PGM2L1	phosphoglucomutase 2 like 1 [Source:HGNC Symbol;Acc:HGNC:20898]	113.06	215.497	103.758	243.874	90.0898	235.12	phosphoglucomutase 2 like 1 [Source:HGNC Symbol;Acc:HGNC:20898]
ENSG00000110042	4494.35	0.483025	0.0712962	6.77491	1.24483e-11	3.98936e-10	DTX4	deltex E3 ubiquitin ligase 4 [Source:HGNC Symbol;Acc:HGNC:29151]	4011.41	5394.62	3740.18	5059.82	3445.33	5314.75	deltex E3 ubiquitin ligase 4 [Source:HGNC Symbol;Acc:HGNC:29151]
ENSG00000049540	954.719	0.84668	0.12501	6.77292	1.2621e-11	4.03638e-10	ELN	elastin [Source:HGNC Symbol;Acc:HGNC:3327]	545.219	1112.21	690.298	1161.25	762.111	1457.23	elastin [Source:HGNC Symbol;Acc:HGNC:3327]
ENSG00000166165	2281.61	-0.514659	0.0760048	-6.7714	1.27545e-11	4.07067e-10	CKB	creatine kinase B [Source:HGNC Symbol;Acc:HGNC:1991]	2830.23	1943.07	2493.86	1884.9	2758.7	1778.9	creatine kinase B [Source:HGNC Symbol;Acc:HGNC:1991]
ENSG00000171855	106.44	-1.4001	0.206871	-6.76796	1.30607e-11	4.15985e-10	IFNB1	interferon beta 1 [Source:HGNC Symbol;Acc:HGNC:5434]	154.714	63.452	157.468	27.3504	181.397	54.2585	interferon beta 1 [Source:HGNC Symbol;Acc:HGNC:5434]
ENSG00000229117	1572.48	0.489562	0.0723573	6.7659	1.32485e-11	4.21101e-10	RPL41	ribosomal protein L41 [Source:HGNC Symbol;Acc:HGNC:10354]	1306.89	1826.94	1249.37	1889.46	1356.22	1806.03	ribosomal protein L41 [Source:HGNC Symbol;Acc:HGNC:10354]
ENSG00000166997	366.819	0.880986	0.130471	6.75237	1.45452e-11	4.60429e-10	CNPY4	canopy FGF signaling regulator 4 [Source:HGNC Symbol;Acc:HGNC:28631]	272.981	440.572	266.11	539.031	209.398	472.824	canopy FGF signaling regulator 4 [Source:HGNC Symbol;Acc:HGNC:28631]
ENSG00000107798	3216.88	-0.564346	0.0835759	-6.7525	1.45323e-11	4.60429e-10	LIPA	lipase A, lysosomal acid type [Source:HGNC Symbol;Acc:HGNC:6617]	3494.46	2778.72	3962.35	2368.09	4110.04	2587.61	lipase A, lysosomal acid type [Source:HGNC Symbol;Acc:HGNC:6617]
ENSG00000196843	730.432	-0.77625	0.115022	-6.74872	1.49158e-11	4.71201e-10	ARID5A	AT-rich interaction domain 5A [Source:HGNC Symbol;Acc:HGNC:17361]	1094.9	502.827	850.208	513.959	850.984	569.714	AT-rich interaction domain 5A [Source:HGNC Symbol;Acc:HGNC:17361]
ENSG00000198133	247.173	-0.994706	0.14741	-6.74789	1.50012e-11	4.72933e-10	TMEM229B	transmembrane protein 229B [Source:HGNC Symbol;Acc:HGNC:20130]	346.619	173.595	292.965	134.473	371.316	164.067	transmembrane protein 229B [Source:HGNC Symbol;Acc:HGNC:20130]
ENSG00000164054	6862.39	0.440473	0.065315	6.74383	1.5427e-11	4.8537e-10	SHISA5	shisa family member 5 [Source:HGNC Symbol;Acc:HGNC:30376]	6042.03	7405.93	5729.29	8281.47	5644.01	8071.6	shisa family member 5 [Source:HGNC Symbol;Acc:HGNC:30376]
ENSG00000133606	2201.64	-0.435271	0.0645542	-6.74273	1.5544e-11	4.88062e-10	MKRN1	makorin ring finger protein 1 [Source:HGNC Symbol;Acc:HGNC:7112]	2496.25	1891.59	2532.92	1881.48	2582.17	1825.41	makorin ring finger protein 1 [Source:HGNC Symbol;Acc:HGNC:7112]
ENSG00000102794	53.6137	-1.57245	0.233654	-6.72982	1.69871e-11	5.32298e-10	IRG1	aconitate decarboxylase 1 [Source:HGNC Symbol;Acc:HGNC:33904]	110.085	17.9581	73.8515	22.792	82.7853	14.2106	aconitate decarboxylase 1 [Source:HGNC Symbol;Acc:HGNC:33904]
ENSG00000144959	2668.09	-0.445158	0.0661555	-6.72896	1.70878e-11	5.34371e-10	NCEH1	neutral cholesterol ester hydrolase 1 [Source:HGNC Symbol;Acc:HGNC:29260]	3171.64	2277.09	3046.22	2333.9	3032.62	2147.09	neutral cholesterol ester hydrolase 1 [Source:HGNC Symbol;Acc:HGNC:29260]
ENSG00000103642	1015.75	-0.599535	0.0891667	-6.72376	1.77091e-11	5.52688e-10	LACTB	lactamase beta [Source:HGNC Symbol;Acc:HGNC:16468]	1187.88	846.426	1197.49	822.791	1308.74	731.198	lactamase beta [Source:HGNC Symbol;Acc:HGNC:16468]
ENSG00000167034	541.932	-0.848282	0.126189	-6.7223	1.78872e-11	5.57127e-10	NKX3-1	NK3 homeobox 1 [Source:HGNC Symbol;Acc:HGNC:7838]	827.869	417.826	612.174	347.578	680.543	365.599	NK3 homeobox 1 [Source:HGNC Symbol;Acc:HGNC:7838]
ENSG00000104320	2681.34	-0.602591	0.0897186	-6.71646	1.86197e-11	5.78778e-10	NBN	nibrin [Source:HGNC Symbol;Acc:HGNC:7652]	3114.37	2408.78	3183.55	1901.99	3456.28	2023.07	nibrin [Source:HGNC Symbol;Acc:HGNC:7652]
ENSG00000113108	486.246	-0.710808	0.105882	-6.71322	1.90379e-11	5.90564e-10	APBB3	amyloid beta precursor protein binding family B member 3 [Source:HGNC Symbol;Acc:HGNC:20708]	622.576	359.162	563.957	355.555	641.586	374.642	amyloid beta precursor protein binding family B member 3 [Source:HGNC Symbol;Acc:HGNC:20708]
ENSG00000242265	1127.31	0.671113	0.0999775	6.71264	1.91131e-11	5.90564e-10	PEG10	paternally expressed 10 [Source:HGNC Symbol;Acc:HGNC:14005]	879.937	1480.95	954.576	1312.82	737.763	1397.8	paternally expressed 10 [Source:HGNC Symbol;Acc:HGNC:14005]
ENSG00000247315	510.229	0.753277	0.112217	6.71267	1.91097e-11	5.90564e-10	ZCCHC3	zinc finger CCHC-type containing 3 [Source:HGNC Symbol;Acc:HGNC:16230]	403.893	611.773	379.023	715.669	334.793	616.222	zinc finger CCHC-type containing 3 [Source:HGNC Symbol;Acc:HGNC:16230]
ENSG00000253276	4838.33	-0.623257	0.0930326	-6.69933	2.09372e-11	6.45641e-10	CCDC71L	coiled-coil domain containing 71-like [Source:HGNC Symbol;Acc:HGNC:26685]	6282.29	3797.54	6358.55	4085.46	5063.29	3442.83	coiled-coil domain containing 71-like [Source:HGNC Symbol;Acc:HGNC:26685]
ENSG00000137275	2086.43	-0.560086	0.0836519	-6.69543	2.15035e-11	6.60477e-10	RIPK1	receptor interacting serine/threonine kinase 1 [Source:HGNC Symbol;Acc:HGNC:10019]	2655.43	1803	2451.75	1507.69	2382.51	1718.19	receptor interacting serine/threonine kinase 1 [Source:HGNC Symbol;Acc:HGNC:10019]
ENSG00000079931	2199.07	0.451634	0.0674516	6.69567	2.1469e-11	6.60477e-10	MOXD1	monooxygenase DBH like 1 [Source:HGNC Symbol;Acc:HGNC:21063]	1816.4	2613.5	1929.29	2548.14	1806.67	2480.39	monooxygenase DBH like 1 [Source:HGNC Symbol;Acc:HGNC:21063]
ENSG00000131238	1766.57	0.521786	0.0780037	6.68926	2.24307e-11	6.87594e-10	PPT1	palmitoyl-protein thioesterase 1 [Source:HGNC Symbol;Acc:HGNC:9325]	1355.98	2048.42	1456.28	2222.22	1520.57	1995.94	palmitoyl-protein thioesterase 1 [Source:HGNC Symbol;Acc:HGNC:9325]
ENSG00000140479	723.921	-0.604248	0.0903631	-6.68689	2.27956e-11	6.97403e-10	PCSK6	proprotein convertase subtilisin/kexin type 6 [Source:HGNC Symbol;Acc:HGNC:8569]	888.862	596.21	869.739	533.333	875.332	580.049	proprotein convertase subtilisin/kexin type 6 [Source:HGNC Symbol;Acc:HGNC:8569]
ENSG00000138757	2428.02	0.481146	0.0720677	6.6763	2.45056e-11	7.48239e-10	G3BP2	G3BP stress granule assembly factor 2 [Source:HGNC Symbol;Acc:HGNC:30291]	1901.94	2900.83	2028.17	2698.57	2129.29	2909.29	G3BP stress granule assembly factor 2 [Source:HGNC Symbol;Acc:HGNC:30291]
ENSG00000204381	3078.92	-0.470947	0.0705706	-6.67342	2.49909e-11	7.6156e-10	LAYN	layilin [Source:HGNC Symbol;Acc:HGNC:29471]	3374.7	2624.28	3545.48	2498	3843.43	2587.61	layilin [Source:HGNC Symbol;Acc:HGNC:29471]
ENSG00000082212	869.383	-0.574768	0.0861513	-6.67161	2.53016e-11	7.69515e-10	ME2	malic enzyme 2 [Source:HGNC Symbol;Acc:HGNC:6984]	992.997	718.325	1055.89	683.76	1088.38	676.939	malic enzyme 2 [Source:HGNC Symbol;Acc:HGNC:6984]
ENSG00000117394	10577.2	0.513983	0.0770973	6.66668	2.61651e-11	7.94222e-10	SLC2A1	solute carrier family 2 member 1 [Source:HGNC Symbol;Acc:HGNC:11005]	8968.21	11873.9	9014.76	13764.1	8021.65	11820.6	solute carrier family 2 member 1 [Source:HGNC Symbol;Acc:HGNC:11005]
ENSG00000225138	739.394	0.668546	0.10043	6.6568	2.79847e-11	8.47794e-10	CTD-2228K2.7		586.872	869.173	606.681	920.797	494.277	958.567
ENSG00000114450	3206.65	-0.607998	0.09138	-6.65351	2.86182e-11	8.65295e-10	GNB4	G protein subunit beta 4 [Source:HGNC Symbol;Acc:HGNC:20731]	3860.42	2852.95	3893.38	2140.17	3928.65	2564.36	G protein subunit beta 4 [Source:HGNC Symbol;Acc:HGNC:20731]
ENSG00000113361	624.747	0.70691	0.106401	6.64385	3.05603e-11	9.2222e-10	CDH6	cadherin 6 [Source:HGNC Symbol;Acc:HGNC:1765]	511.747	810.51	457.147	834.187	433.405	701.485	cadherin 6 [Source:HGNC Symbol;Acc:HGNC:1765]
ENSG00000130147	3656.06	-0.481189	0.0724922	-6.6378	3.18404e-11	9.58983e-10	SH3BP4	SH3 domain binding protein 4 [Source:HGNC Symbol;Acc:HGNC:10826]	4428.69	2924.78	4378.6	3262.67	4007.78	2933.83	SH3 domain binding protein 4 [Source:HGNC Symbol;Acc:HGNC:10826]
ENSG00000168824	408.996	0.834563	0.12574	6.63723	3.19631e-11	9.60813e-10	D4S234E	Neuron-specific protein family member 1 [Source:UniProtKB/Swiss-Prot;Acc:P42857]	298.271	460.925	273.434	619.942	288.531	512.872	Neuron-specific protein family member 1 [Source:UniProtKB/Swiss-Prot;Acc:P42857]
ENSG00000163565	9472.56	-0.504707	0.0761359	-6.62903	3.37901e-11	1.01377e-09	IFI16	interferon gamma inducible protein 16 [Source:HGNC Symbol;Acc:HGNC:5395]	10829.2	8575.6	11162	6989.16	11458.5	7820.98	interferon gamma inducible protein 16 [Source:HGNC Symbol;Acc:HGNC:5395]
ENSG00000174231	4513.1	0.44536	0.0672097	6.62643	3.43913e-11	1.02981e-09	PRPF8	pre-mRNA processing factor 8 [Source:HGNC Symbol;Acc:HGNC:17340]	3951.9	4945.67	3876.9	5437.03	3596.29	5270.83	pre-mRNA processing factor 8 [Source:HGNC Symbol;Acc:HGNC:17340]
ENSG00000159403	20469.7	-0.454051	0.0685283	-6.62575	3.45497e-11	1.03256e-09	C1R	complement C1r [Source:HGNC Symbol;Acc:HGNC:1246]	23457.8	16845.9	22069.4	16789.7	25645.2	18009.9	complement C1r [Source:HGNC Symbol;Acc:HGNC:1246]
ENSG00000198840	3009.27	0.637918	0.096362	6.62001	3.59165e-11	1.07135e-09	MT-ND3	mitochondrially encoded NADH:ubiquinone oxidoreductase core subunit 3 [Source:HGNC Symbol;Acc:HGNC:7458]	2659.15	3505.42	2008.03	3980.62	2326.51	3575.89	mitochondrially encoded NADH:ubiquinone oxidoreductase core subunit 3 [Source:HGNC Symbol;Acc:HGNC:7458]
ENSG00000227051	2978.6	0.508035	0.0768417	6.61146	3.80559e-11	1.13299e-09	C14orf132	chromosome 14 open reading frame 132 [Source:HGNC Symbol;Acc:HGNC:20346]	2643.53	3547.33	2467.62	3365.24	2225.46	3622.4	chromosome 14 open reading frame 132 [Source:HGNC Symbol;Acc:HGNC:20346]
ENSG00000174807	12447	0.567827	0.0859809	6.60411	3.99926e-11	1.18836e-09	CD248	CD248 molecule [Source:HGNC Symbol;Acc:HGNC:18219]	10383.7	13305.8	10454	16599.4	9033.33	14905.6	CD248 molecule [Source:HGNC Symbol;Acc:HGNC:18219]
ENSG00000174282	3224.61	0.470183	0.0712785	6.59642	4.21193e-11	1.24916e-09	ZBTB4	zinc finger and BTB domain containing 4 [Source:HGNC Symbol;Acc:HGNC:23847]	2869.65	3589.23	2661.1	3747	2545.65	3935.03	zinc finger and BTB domain containing 4 [Source:HGNC Symbol;Acc:HGNC:23847]
ENSG00000133466	377.167	0.763573	0.115785	6.59476	4.25949e-11	1.26086e-09	C1QTNF6	C1q and tumor necrosis factor related protein 6 [Source:HGNC Symbol;Acc:HGNC:14343]	280.419	436.981	268.551	478.632	273.922	524.499	C1q and tumor necrosis factor related protein 6 [Source:HGNC Symbol;Acc:HGNC:14343]
ENSG00000132640	1130.6	-0.603846	0.0916713	-6.58707	4.48578e-11	1.32531e-09	BTBD3	BTB domain containing 3 [Source:HGNC Symbol;Acc:HGNC:15854]	1302.43	996.077	1416	823.931	1396.39	848.758	BTB domain containing 3 [Source:HGNC Symbol;Acc:HGNC:15854]
ENSG00000204632	2285.66	-0.482285	0.0732709	-6.58222	4.63475e-11	1.36672e-09	HLA-G	major histocompatibility complex, class I, G [Source:HGNC Symbol;Acc:HGNC:4964]	2772.95	1882.01	2528.65	2005.7	2717.3	1807.32	major histocompatibility complex, class I, G [Source:HGNC Symbol;Acc:HGNC:4964]
ENSG00000125826	5958.6	-0.423166	0.0643544	-6.57556	4.84719e-11	1.42666e-09	RBCK1	RANBP2-type and C3HC4-type zinc finger containing 1 [Source:HGNC Symbol;Acc:HGNC:15864]	7220.98	5127.64	6746.12	4867.23	6549.77	5239.82	RANBP2-type and C3HC4-type zinc finger containing 1 [Source:HGNC Symbol;Acc:HGNC:15864]
ENSG00000169180	5275.91	-0.370474	0.0563923	-6.56958	5.04572e-11	1.48228e-09	XPO6	exportin 6 [Source:HGNC Symbol;Acc:HGNC:19733]	5894.76	4697.84	5896.52	4565.24	6084.72	4516.37	exportin 6 [Source:HGNC Symbol;Acc:HGNC:19733]
ENSG00000168615	10676.9	-0.449282	0.068547	-6.55437	5.58772e-11	1.63839e-09	ADAM9	ADAM metallopeptidase domain 9 [Source:HGNC Symbol;Acc:HGNC:216]	11955.4	9800.34	12743.3	8529.9	12369.1	8663.27	ADAM metallopeptidase domain 9 [Source:HGNC Symbol;Acc:HGNC:216]
ENSG00000119139	2084.98	-0.535851	0.0817608	-6.55389	5.60563e-11	1.64055e-09	TJP2	tight junction protein 2 [Source:HGNC Symbol;Acc:HGNC:11828]	2656.17	1813.77	2470.67	1691.17	2304.6	1573.5	tight junction protein 2 [Source:HGNC Symbol;Acc:HGNC:11828]
ENSG00000171621	1554.67	-0.528157	0.0806308	-6.55032	5.74136e-11	1.67711e-09	SPSB1	splA/ryanodine receptor domain and SOCS box containing 1 [Source:HGNC Symbol;Acc:HGNC:30628]	2012.03	1271.43	1757.18	1256.98	1759.19	1271.2	splA/ryanodine receptor domain and SOCS box containing 1 [Source:HGNC Symbol;Acc:HGNC:30628]
ENSG00000062194	2457.09	-0.594197	0.0907234	-6.54955	5.77107e-11	1.68261e-09	GPBP1	GC-rich promoter binding protein 1 [Source:HGNC Symbol;Acc:HGNC:29520]	2844.36	2165.75	2907.06	1690.03	3166.54	1968.81	GC-rich promoter binding protein 1 [Source:HGNC Symbol;Acc:HGNC:29520]
ENSG00000147509	341.687	-0.853185	0.130274	-6.54914	5.78703e-11	1.6841e-09	RGS20	regulator of G-protein signaling 20 [Source:HGNC Symbol;Acc:HGNC:14600]	445.547	276.555	466.302	200.57	427.318	233.828	regulator of G-protein signaling 20 [Source:HGNC Symbol;Acc:HGNC:14600]
ENSG00000157693	531.447	-0.802894	0.122621	-6.54777	5.84045e-11	1.69646e-09	C9orf91	transmembrane protein 268 [Source:HGNC Symbol;Acc:HGNC:24513]	656.791	399.867	637.808	313.39	759.676	421.149	transmembrane protein 268 [Source:HGNC Symbol;Acc:HGNC:24513]
ENSG00000163874	3129.27	-0.760015	0.116115	-6.54537	5.93463e-11	1.71845e-09	ZC3H12A	zinc finger CCCH-type containing 12A [Source:HGNC Symbol;Acc:HGNC:26259]	4742.58	2160.96	3111.53	2227.92	4083.26	2449.38	zinc finger CCCH-type containing 12A [Source:HGNC Symbol;Acc:HGNC:26259]
ENSG00000163577	764.852	-0.568648	0.0868791	-6.54528	5.9383e-11	1.71845e-09	EIF5A2	eukaryotic translation initiation factor 5A2 [Source:HGNC Symbol;Acc:HGNC:3301]	888.119	620.154	945.421	603.988	920.377	611.054	eukaryotic translation initiation factor 5A2 [Source:HGNC Symbol;Acc:HGNC:3301]
ENSG00000011426	2021.48	-0.661154	0.101051	-6.54281	6.03755e-11	1.74392e-09	ANLN	anillin actin binding protein [Source:HGNC Symbol;Acc:HGNC:14082]	2171.2	1734.75	2520.72	1438.17	2796.44	1467.56	anillin actin binding protein [Source:HGNC Symbol;Acc:HGNC:14082]
ENSG00000125772	1530.96	0.695091	0.106303	6.53875	6.20358e-11	1.78855e-09	GPCPD1	glycerophosphocholine phosphodiesterase 1 [Source:HGNC Symbol;Acc:HGNC:26957]	1126.88	1555.17	1177.96	1990.88	1152.91	2181.97	glycerophosphocholine phosphodiesterase 1 [Source:HGNC Symbol;Acc:HGNC:26957]
ENSG00000177565	1413.6	-0.55075	0.0842853	-6.53436	6.38831e-11	1.83839e-09	TBL1XR1	transducin beta like 1 X-linked receptor 1 [Source:HGNC Symbol;Acc:HGNC:29529]	1614.83	1236.72	1796.85	1080.34	1649.62	1103.26	transducin beta like 1 X-linked receptor 1 [Source:HGNC Symbol;Acc:HGNC:29529]
ENSG00000101298	3025.8	0.618189	0.0946421	6.53186	6.49579e-11	1.86585e-09	SNPH	syntaphilin [Source:HGNC Symbol;Acc:HGNC:15931]	2600.39	3347.39	2449.92	3981.76	2037.98	3737.38	syntaphilin [Source:HGNC Symbol;Acc:HGNC:15931]
ENSG00000065060	1484.12	-0.713058	0.109303	-6.52366	6.8614e-11	1.96723e-09	UHRF1BP1	UHRF1 binding protein 1 [Source:HGNC Symbol;Acc:HGNC:21216]	1894.5	1263.05	1748.63	890.027	1939.37	1169.14	UHRF1 binding protein 1 [Source:HGNC Symbol;Acc:HGNC:21216]
ENSG00000213516	568.546	-0.740547	0.113689	-6.51378	7.32818e-11	2.09718e-09	RBMXL1	RNA binding motif protein, X-linked like 1 [Source:HGNC Symbol;Acc:HGNC:25073]	754.975	488.461	706.777	369.23	693.935	397.896	RNA binding motif protein, X-linked like 1 [Source:HGNC Symbol;Acc:HGNC:25073]
ENSG00000116977	2108.39	-0.465145	0.0715108	-6.50454	7.79292e-11	2.22608e-09	LGALS8	galectin 8 [Source:HGNC Symbol;Acc:HGNC:6569]	2421.87	1877.22	2422.45	1747.01	2513.99	1667.8	galectin 8 [Source:HGNC Symbol;Acc:HGNC:6569]
ENSG00000197977	739.726	-0.832726	0.128081	-6.50154	7.95037e-11	2.26688e-09	ELOVL2	ELOVL fatty acid elongase 2 [Source:HGNC Symbol;Acc:HGNC:14416]	878.449	605.787	900.866	418.233	1106.64	528.374	ELOVL fatty acid elongase 2 [Source:HGNC Symbol;Acc:HGNC:14416]
ENSG00000147883	370.563	-0.772301	0.118833	-6.49903	8.08378e-11	2.30069e-09	CDKN2B	cyclin dependent kinase inhibitor 2B [Source:HGNC Symbol;Acc:HGNC:1788]	493.895	259.794	494.378	258.689	428.535	288.087	cyclin dependent kinase inhibitor 2B [Source:HGNC Symbol;Acc:HGNC:1788]
ENSG00000102870	893.854	0.577323	0.088857	6.49722	8.18194e-11	2.32436e-09	ZNF629	zinc finger protein 629 [Source:HGNC Symbol;Acc:HGNC:29008]	720.016	1005.65	739.125	1079.2	673.239	1145.89	zinc finger protein 629 [Source:HGNC Symbol;Acc:HGNC:29008]
ENSG00000162616	902.393	-0.632451	0.0973473	-6.49685	8.20195e-11	2.32579e-09	DNAJB4	DnaJ heat shock protein family (Hsp40) member B4 [Source:HGNC Symbol;Acc:HGNC:14886]	1022.01	776.988	1114.49	660.968	1178.47	661.437	DnaJ heat shock protein family (Hsp40) member B4 [Source:HGNC Symbol;Acc:HGNC:14886]
ENSG00000122547	423.473	0.762273	0.117456	6.48988	8.59046e-11	2.43151e-09	EEPD1	endonuclease/exonuclease/phosphatase family domain containing 1 [Source:HGNC Symbol;Acc:HGNC:22223]	317.61	481.278	325.923	558.404	277.574	580.049	endonuclease/exonuclease/phosphatase family domain containing 1 [Source:HGNC Symbol;Acc:HGNC:22223]
ENSG00000198018	1033.53	-0.582347	0.0898091	-6.48427	8.91601e-11	2.51906e-09	ENTPD7	ectonucleoside triphosphate diphosphohydrolase 7 [Source:HGNC Symbol;Acc:HGNC:19745]	1239.94	817.693	1311.02	892.307	1185.78	754.452	ectonucleoside triphosphate diphosphohydrolase 7 [Source:HGNC Symbol;Acc:HGNC:19745]
ENSG00000104756	1211.8	-0.598171	0.0923053	-6.48035	9.1508e-11	2.58069e-09	KCTD9	potassium channel tetramerization domain containing 9 [Source:HGNC Symbol;Acc:HGNC:22401]	1385.73	1046.36	1498.39	845.583	1519.35	975.361	potassium channel tetramerization domain containing 9 [Source:HGNC Symbol;Acc:HGNC:22401]
ENSG00000112531	3389.34	-0.509527	0.0786775	-6.47615	9.4095e-11	2.64883e-09	QKI	QKI, KH domain containing RNA binding [Source:HGNC Symbol;Acc:HGNC:21100]	3888.68	2970.27	3922.06	2484.33	4178.22	2892.49	QKI, KH domain containing RNA binding [Source:HGNC Symbol;Acc:HGNC:21100]
ENSG00000235162	2146.24	-0.548919	0.084764	-6.47585	9.42776e-11	2.64917e-09	C12orf75	chromosome 12 open reading frame 75 [Source:HGNC Symbol;Acc:HGNC:35164]	2291.7	1763.49	2629.97	1797.15	2764.78	1630.34	chromosome 12 open reading frame 75 [Source:HGNC Symbol;Acc:HGNC:35164]
ENSG00000243701	448.131	-0.910867	0.140668	-6.47527	9.464e-11	2.65454e-09	LINC00883	DPPA2 upstream binding RNA [Source:HGNC Symbol;Acc:HGNC:48569]	535.549	356.768	712.881	267.806	539.322	276.46	DPPA2 upstream binding RNA [Source:HGNC Symbol;Acc:HGNC:48569]
ENSG00000132199	824.854	0.711208	0.109906	6.47104	9.73326e-11	2.72514e-09	ENOSF1	enolase superfamily member 1 [Source:HGNC Symbol;Acc:HGNC:30365]	669.436	1087.06	664.053	1059.83	508.886	959.859	enolase superfamily member 1 [Source:HGNC Symbol;Acc:HGNC:30365]
ENSG00000158457	53.8922	-1.4765	0.22857	-6.45973	1.04893e-10	2.93152e-09	TSPAN33	tetraspanin 33 [Source:HGNC Symbol;Acc:HGNC:28743]	93.7211	22.7469	77.5136	25.0712	90.0898	14.2106	tetraspanin 33 [Source:HGNC Symbol;Acc:HGNC:28743]
ENSG00000175073	1497.59	-0.540995	0.0837893	-6.45661	1.07076e-10	2.98716e-09	VCPIP1	valosin containing protein interacting protein 1 [Source:HGNC Symbol;Acc:HGNC:30897]	1714.5	1308.55	1892.06	1120.23	1739.71	1210.48	valosin containing protein interacting protein 1 [Source:HGNC Symbol;Acc:HGNC:30897]
ENSG00000168685	5949.77	-0.462392	0.071629	-6.45537	1.07953e-10	3.0062e-09	IL7R	interleukin 7 receptor [Source:HGNC Symbol;Acc:HGNC:6024]	7270.08	5174.33	6536.16	5188.6	6938.13	4591.3	interleukin 7 receptor [Source:HGNC Symbol;Acc:HGNC:6024]
ENSG00000103047	392.487	-0.773095	0.119998	-6.44258	1.17458e-10	3.2592e-09	TANGO6	transport and golgi organization 6 homolog [Source:HGNC Symbol;Acc:HGNC:25749]	496.87	283.738	449.212	286.04	560.018	279.044	transport and golgi organization 6 homolog [Source:HGNC Symbol;Acc:HGNC:25749]
ENSG00000161544	1571.61	0.815633	0.126597	6.44276	1.17323e-10	3.2592e-09	CYGB	cytoglobin [Source:HGNC Symbol;Acc:HGNC:16505]	1262.26	1570.74	1092.51	2352.13	973.944	2178.09	cytoglobin [Source:HGNC Symbol;Acc:HGNC:16505]
ENSG00000102081	1764.48	-0.57318	0.0890297	-6.43808	1.20995e-10	3.34537e-09	FMR1	fragile X mental retardation 1 [Source:HGNC Symbol;Acc:HGNC:3775]	2073.76	1508.48	2243.01	1231.91	2044.07	1485.65	fragile X mental retardation 1 [Source:HGNC Symbol;Acc:HGNC:3775]
ENSG00000160285	7665.32	-0.472093	0.0733283	-6.43808	1.20994e-10	3.34537e-09	LSS	lanosterol synthase (2,3-oxidosqualene-lanosterol cyclase) [Source:HGNC Symbol;Acc:HGNC:6708]	9322.27	6701.97	9401.72	6316.8	8074	6175.13	lanosterol synthase (2,3-oxidosqualene-lanosterol cyclase) [Source:HGNC Symbol;Acc:HGNC:6708]
ENSG00000205542	6280.97	-0.467069	0.0725554	-6.43741	1.2153e-10	3.35418e-09	TMSB4X	thymosin beta 4, X-linked [Source:HGNC Symbol;Acc:HGNC:11881]	7148.83	5137.22	6884.67	5029.05	7898.69	5587.33	thymosin beta 4, X-linked [Source:HGNC Symbol;Acc:HGNC:11881]
ENSG00000169715	527.093	0.703654	0.109332	6.43593	1.22716e-10	3.3809e-09	MT1E	metallothionein 1E [Source:HGNC Symbol;Acc:HGNC:7397]	423.976	589.026	370.478	699.714	390.795	688.566	metallothionein 1E [Source:HGNC Symbol;Acc:HGNC:7397]
ENSG00000133106	4938.69	-0.537164	0.0834673	-6.43563	1.22965e-10	3.38176e-09	EPSTI1	epithelial stromal interaction 1 [Source:HGNC Symbol;Acc:HGNC:16465]	5876.16	4363.82	5618.21	3491.73	6123.67	4158.53	epithelial stromal interaction 1 [Source:HGNC Symbol;Acc:HGNC:16465]
ENSG00000012232	1094.2	0.546179	0.0849664	6.42818	1.29141e-10	3.54531e-09	EXTL3	exostosin like glycosyltransferase 3 [Source:HGNC Symbol;Acc:HGNC:3518]	894.069	1221.15	856.921	1411.96	902.116	1278.95	exostosin like glycosyltransferase 3 [Source:HGNC Symbol;Acc:HGNC:3518]
ENSG00000113645	391.141	-0.774158	0.120438	-6.42784	1.29431e-10	3.54701e-09	WWC1	WW and C2 domain containing 1 [Source:HGNC Symbol;Acc:HGNC:29435]	525.135	243.033	479.73	308.832	494.277	295.838	WW and C2 domain containing 1 [Source:HGNC Symbol;Acc:HGNC:29435]
ENSG00000033178	2301.56	-0.541751	0.0843267	-6.42444	1.32358e-10	3.62083e-09	UBA6	ubiquitin like modifier activating enzyme 6 [Source:HGNC Symbol;Acc:HGNC:25581]	2606.34	2072.37	2750.82	1691.17	2865.83	1822.83	ubiquitin like modifier activating enzyme 6 [Source:HGNC Symbol;Acc:HGNC:25581]
ENSG00000197142	567.117	-0.756123	0.117775	-6.42009	1.36198e-10	3.7193e-09	ACSL5	acyl-CoA synthetase long-chain family member 5 [Source:HGNC Symbol;Acc:HGNC:16526]	707.371	409.445	635.977	377.208	820.548	452.154	acyl-CoA synthetase long-chain family member 5 [Source:HGNC Symbol;Acc:HGNC:16526]
ENSG00000261618	57.2102	-1.4994	0.233714	-6.41554	1.40322e-10	3.8252e-09	RP11-79H23.3		121.986	26.3386	74.4618	17.094	84.0027	19.378
ENSG00000003400	347.715	-0.750038	0.117077	-6.40634	1.4905e-10	4.056e-09	CASP10	caspase 10 [Source:HGNC Symbol;Acc:HGNC:1500]	431.414	258.597	421.747	245.014	471.145	258.374	caspase 10 [Source:HGNC Symbol;Acc:HGNC:1500]
ENSG00000104518	1468.53	-0.508153	0.0793426	-6.40454	1.50824e-10	4.09709e-09	GSDMD	gasdermin D [Source:HGNC Symbol;Acc:HGNC:25697]	1813.43	1221.15	1740.7	1136.18	1635.01	1264.74	gasdermin D [Source:HGNC Symbol;Acc:HGNC:25697]
ENSG00000048342	501.779	0.659427	0.103102	6.39584	1.59669e-10	4.32976e-09	CC2D2A	coiled-coil and C2 domain containing 2A [Source:HGNC Symbol;Acc:HGNC:29253]	383.81	654.873	400.995	624.501	366.446	580.049	coiled-coil and C2 domain containing 2A [Source:HGNC Symbol;Acc:HGNC:29253]
ENSG00000180611	377.54	-0.839575	0.13128	-6.39532	1.60214e-10	4.33696e-09	MB21D2	Mab-21 domain containing 2 [Source:HGNC Symbol;Acc:HGNC:30438]	462.655	276.555	464.471	291.738	551.496	218.326	Mab-21 domain containing 2 [Source:HGNC Symbol;Acc:HGNC:30438]
ENSG00000115419	3696.97	-0.525546	0.0822155	-6.3923	1.63409e-10	4.41575e-09	GLS	glutaminase [Source:HGNC Symbol;Acc:HGNC:4331]	4485.22	3261.19	4661.19	2766.95	3990.74	3016.51	glutaminase [Source:HGNC Symbol;Acc:HGNC:4331]
ENSG00000115091	6539.29	-0.400382	0.0626429	-6.3915	1.64266e-10	4.43117e-09	ACTR3	ARP3 actin related protein 3 homolog [Source:HGNC Symbol;Acc:HGNC:170]	7022.39	5774.13	7596.94	5482.61	7746.51	5613.17	ARP3 actin related protein 3 homolog [Source:HGNC Symbol;Acc:HGNC:170]
ENSG00000183580	612.343	-0.665669	0.104189	-6.38908	1.66889e-10	4.49412e-09	FBXL7	F-box and leucine rich repeat protein 7 [Source:HGNC Symbol;Acc:HGNC:13604]	770.595	504.025	710.439	417.093	791.33	480.575	F-box and leucine rich repeat protein 7 [Source:HGNC Symbol;Acc:HGNC:13604]
ENSG00000171492	902.249	-0.61474	0.0962231	-6.38869	1.67312e-10	4.49771e-09	LRRC8D	leucine rich repeat containing 8 family member D [Source:HGNC Symbol;Acc:HGNC:16992]	1076.3	733.888	1019.27	732.763	1204.04	647.226	leucine rich repeat containing 8 family member D [Source:HGNC Symbol;Acc:HGNC:16992]
ENSG00000143179	1204.95	0.492406	0.0771081	6.38593	1.70364e-10	4.57181e-09	UCK2	uridine-cytidine kinase 2 [Source:HGNC Symbol;Acc:HGNC:12562]	1024.98	1383.97	947.863	1419.94	1018.99	1433.97	uridine-cytidine kinase 2 [Source:HGNC Symbol;Acc:HGNC:12562]
ENSG00000167601	14362.1	-0.318117	0.0498205	-6.38527	1.71098e-10	4.58359e-09	AXL	AXL receptor tyrosine kinase [Source:HGNC Symbol;Acc:HGNC:905]	16018.1	12617.4	15848.2	12901.4	15997	12790.8	AXL receptor tyrosine kinase [Source:HGNC Symbol;Acc:HGNC:905]
ENSG00000198121	10416.7	-0.387974	0.0607738	-6.38391	1.72623e-10	4.61647e-09	LPAR1	lysophosphatidic acid receptor 1 [Source:HGNC Symbol;Acc:HGNC:3166]	11709.9	9314.28	11489.1	8540.16	12290	9156.77	lysophosphatidic acid receptor 1 [Source:HGNC Symbol;Acc:HGNC:3166]
ENSG00000009307	9846.43	-0.397042	0.0622186	-6.3814	1.75477e-10	4.68473e-09	CSDE1	cold shock domain containing E1 [Source:HGNC Symbol;Acc:HGNC:29905]	11291.9	8889.27	11263.9	7900.84	11081	8651.65	cold shock domain containing E1 [Source:HGNC Symbol;Acc:HGNC:29905]
ENSG00000162630	184.959	-1.29903	0.203587	-6.38075	1.76225e-10	4.69662e-09	B3GALT2	beta-1,3-galactosyltransferase 2 [Source:HGNC Symbol;Acc:HGNC:917]	214.963	108.946	251.461	55.8404	371.316	107.225	beta-1,3-galactosyltransferase 2 [Source:HGNC Symbol;Acc:HGNC:917]
ENSG00000048471	634.865	0.587946	0.0921548	6.37998	1.77105e-10	4.71198e-09	SNX29	sorting nexin 29 [Source:HGNC Symbol;Acc:HGNC:30542]	519.185	788.96	504.754	743.019	483.32	769.954	sorting nexin 29 [Source:HGNC Symbol;Acc:HGNC:30542]
ENSG00000143815	900.924	-0.573666	0.0899635	-6.37665	1.81003e-10	4.80743e-09	LBR	lamin B receptor [Source:HGNC Symbol;Acc:HGNC:6518]	1082.26	787.763	1100.45	663.247	1066.47	705.361	lamin B receptor [Source:HGNC Symbol;Acc:HGNC:6518]
ENSG00000111817	1374.91	0.496299	0.0778778	6.37279	1.85621e-10	4.92165e-09	DSE	dermatan sulfate epimerase [Source:HGNC Symbol;Acc:HGNC:21144]	1148.45	1664.12	1177.96	1531.62	1074.99	1652.3	dermatan sulfate epimerase [Source:HGNC Symbol;Acc:HGNC:21144]
ENSG00000071246	259.542	0.868214	0.136297	6.37002	1.8901e-10	5.00295e-09	VASH1	vasohibin 1 [Source:HGNC Symbol;Acc:HGNC:19964]	198.599	316.063	178.22	363.532	154.614	346.221	vasohibin 1 [Source:HGNC Symbol;Acc:HGNC:19964]
ENSG00000105245	745.454	0.568783	0.0893594	6.36512	1.9514e-10	5.15641e-09	NUMBL	NUMB like, endocytic adaptor protein [Source:HGNC Symbol;Acc:HGNC:8061]	594.311	877.553	627.433	891.167	562.453	919.811	NUMB like, endocytic adaptor protein [Source:HGNC Symbol;Acc:HGNC:8061]
ENSG00000162704	4880.47	-0.383491	0.0602739	-6.36247	1.98537e-10	5.23725e-09	ARPC5	actin related protein 2/3 complex subunit 5 [Source:HGNC Symbol;Acc:HGNC:708]	5334.66	4257.27	5612.71	4087.74	5656.18	4334.22	actin related protein 2/3 complex subunit 5 [Source:HGNC Symbol;Acc:HGNC:708]
ENSG00000120690	3465.32	-0.430388	0.0676639	-6.36067	2.00878e-10	5.28618e-09	ELF1	E74 like ETS transcription factor 1 [Source:HGNC Symbol;Acc:HGNC:3316]	4113.31	3086.4	3952.58	2754.41	3894.56	2990.68	E74 like ETS transcription factor 1 [Source:HGNC Symbol;Acc:HGNC:3316]
ENSG00000100644	9927.2	-0.392594	0.0617236	-6.36052	2.01073e-10	5.28618e-09	HIF1A	hypoxia inducible factor 1 alpha subunit [Source:HGNC Symbol;Acc:HGNC:4910]	11157.3	8912.02	10818.9	8357.82	11896.7	8420.4	hypoxia inducible factor 1 alpha subunit [Source:HGNC Symbol;Acc:HGNC:4910]
ENSG00000162636	1011.59	0.578596	0.0909888	6.35898	2.031e-10	5.33044e-09	FAM102B	family with sequence similarity 102 member B [Source:HGNC Symbol;Acc:HGNC:27637]	807.042	1142.14	846.546	1179.49	757.242	1337.08	family with sequence similarity 102 member B [Source:HGNC Symbol;Acc:HGNC:27637]
ENSG00000162458	1972.09	0.487012	0.076651	6.35363	2.10295e-10	5.50994e-09	FBLIM1	filamin binding LIM protein 1 [Source:HGNC Symbol;Acc:HGNC:24686]	1718.22	2334.56	1668.68	2194.87	1512.05	2404.17	filamin binding LIM protein 1 [Source:HGNC Symbol;Acc:HGNC:24686]
ENSG00000234518	100.023	-1.20851	0.190259	-6.35192	2.12649e-10	5.56222e-09	PTGES3P1	prostaglandin E synthase 3 pseudogene 1 [Source:HGNC Symbol;Acc:HGNC:43824]	153.97	58.6632	160.52	52.4216	124.178	50.3829	prostaglandin E synthase 3 pseudogene 1 [Source:HGNC Symbol;Acc:HGNC:43824]
ENSG00000136205	13291.1	-0.377808	0.05959	-6.34013	2.29573e-10	5.99478e-09	TNS3	tensin 3 [Source:HGNC Symbol;Acc:HGNC:21616]	15676.7	11647.6	14696.4	11013.1	14760.1	11952.4	tensin 3 [Source:HGNC Symbol;Acc:HGNC:21616]
ENSG00000180957	1691.21	-0.52082	0.0821593	-6.33915	2.3103e-10	6.0227e-09	PITPNB	phosphatidylinositol transfer protein beta [Source:HGNC Symbol;Acc:HGNC:9002]	1891.53	1437.85	2025.73	1254.7	2086.68	1450.77	phosphatidylinositol transfer protein beta [Source:HGNC Symbol;Acc:HGNC:9002]
ENSG00000079459	3223.52	-0.482702	0.0761545	-6.33845	2.32092e-10	6.04024e-09	FDFT1	farnesyl-diphosphate farnesyltransferase 1 [Source:HGNC Symbol;Acc:HGNC:3629]	3439.41	2820.62	3886.66	2602.85	3985.87	2605.7	farnesyl-diphosphate farnesyltransferase 1 [Source:HGNC Symbol;Acc:HGNC:3629]
ENSG00000100567	2087.86	-0.419674	0.0662521	-6.3345	2.3812e-10	6.18673e-09	PSMA3	proteasome subunit alpha 3 [Source:HGNC Symbol;Acc:HGNC:9532]	2383.19	1739.54	2448.7	1775.5	2349.64	1830.58	proteasome subunit alpha 3 [Source:HGNC Symbol;Acc:HGNC:9532]
ENSG00000168621	162.718	1.06487	0.168347	6.32543	2.52524e-10	6.55e-09	GDNF	glial cell derived neurotrophic factor [Source:HGNC Symbol;Acc:HGNC:4232]	119.011	237.047	80.5653	239.316	94.9596	205.407	glial cell derived neurotrophic factor [Source:HGNC Symbol;Acc:HGNC:4232]
ENSG00000131069	1319.98	-0.519363	0.082259	-6.31376	2.72343e-10	7.05227e-09	ACSS2	acyl-CoA synthetase short-chain family member 2 [Source:HGNC Symbol;Acc:HGNC:15814]	1545.65	1167.28	1632.67	1025.64	1503.53	1045.12	acyl-CoA synthetase short-chain family member 2 [Source:HGNC Symbol;Acc:HGNC:15814]
ENSG00000166401	1646.29	-0.447495	0.0709074	-6.31098	2.77273e-10	7.16798e-09	SERPINB8	serpin family B member 8 [Source:HGNC Symbol;Acc:HGNC:8952]	1930.21	1430.66	1855.44	1396.01	1929.63	1335.79	serpin family B member 8 [Source:HGNC Symbol;Acc:HGNC:8952]
ENSG00000180694	956.45	-0.597538	0.0947699	-6.30515	2.87912e-10	7.43061e-09	TMEM64	transmembrane protein 64 [Source:HGNC Symbol;Acc:HGNC:25441]	1143.25	755.438	1076.03	695.156	1258.82	810.002	transmembrane protein 64 [Source:HGNC Symbol;Acc:HGNC:25441]
ENSG00000089177	554.066	0.650355	0.103151	6.30489	2.88407e-10	7.43103e-09	KIF16B	kinesin family member 16B [Source:HGNC Symbol;Acc:HGNC:15869]	393.48	687.197	454.095	641.595	429.753	718.279	kinesin family member 16B [Source:HGNC Symbol;Acc:HGNC:15869]
ENSG00000198431	12731.9	-0.448092	0.071119	-6.30059	2.96508e-10	7.6271e-09	TXNRD1	thioredoxin reductase 1 [Source:HGNC Symbol;Acc:HGNC:12437]	14497	11231	16036.8	10586.9	13657.1	10382.8	thioredoxin reductase 1 [Source:HGNC Symbol;Acc:HGNC:12437]
ENSG00000171307	661.615	0.636573	0.101073	6.29815	3.01218e-10	7.73541e-09	ZDHHC16	zinc finger DHHC-type containing 16 [Source:HGNC Symbol;Acc:HGNC:20714]	547.45	765.016	494.378	893.446	494.277	775.121	zinc finger DHHC-type containing 16 [Source:HGNC Symbol;Acc:HGNC:20714]
ENSG00000139926	5577.29	-0.438606	0.0696933	-6.29338	3.10624e-10	7.96378e-09	FRMD6	FERM domain containing 6 [Source:HGNC Symbol;Acc:HGNC:19839]	6205.67	5090.53	6751	4507.12	6345.25	4564.17	FERM domain containing 6 [Source:HGNC Symbol;Acc:HGNC:19839]
ENSG00000077782	8485.86	-0.440501	0.0700131	-6.29169	3.14035e-10	8.03795e-09	FGFR1	fibroblast growth factor receptor 1 [Source:HGNC Symbol;Acc:HGNC:3688]	10614.3	6832.47	9349.23	7483.75	9422.91	7212.51	fibroblast growth factor receptor 1 [Source:HGNC Symbol;Acc:HGNC:3688]
ENSG00000114978	4189.95	-0.441367	0.0701823	-6.28887	3.1979e-10	8.17178e-09	MOB1A	MOB kinase activator 1A [Source:HGNC Symbol;Acc:HGNC:16015]	4758.2	3729.3	4922.42	3235.32	4831.98	3662.45	MOB kinase activator 1A [Source:HGNC Symbol;Acc:HGNC:16015]
ENSG00000129515	3362.61	-0.499612	0.0794746	-6.28644	3.24827e-10	8.28682e-09	SNX6	sorting nexin 6 [Source:HGNC Symbol;Acc:HGNC:14970]	3643.96	2928.37	3901.31	2606.26	4318.22	2777.52	sorting nexin 6 [Source:HGNC Symbol;Acc:HGNC:14970]
ENSG00000197956	24495.2	0.587863	0.0935825	6.28176	3.3476e-10	8.52621e-09	S100A6	S100 calcium binding protein A6 [Source:HGNC Symbol;Acc:HGNC:10496]	22008.1	26406.8	19311.9	30776	16880.9	31587.5	S100 calcium binding protein A6 [Source:HGNC Symbol;Acc:HGNC:10496]
ENSG00000037965	889.234	-0.565345	0.0900733	-6.2765	3.46276e-10	8.80506e-09	HOXC8	homeobox C8 [Source:HGNC Symbol;Acc:HGNC:5129]	1114.98	756.635	1083.36	667.805	999.51	713.112	homeobox C8 [Source:HGNC Symbol;Acc:HGNC:5129]
ENSG00000138613	637.602	0.601036	0.0957829	6.27498	3.49673e-10	8.87689e-09	APH1B	aph-1 homolog B, gamma-secretase subunit [Source:HGNC Symbol;Acc:HGNC:24080]	496.87	833.257	518.181	737.321	489.407	750.576	aph-1 homolog B, gamma-secretase subunit [Source:HGNC Symbol;Acc:HGNC:24080]
ENSG00000123737	655.03	-0.603379	0.0961767	-6.27364	3.52693e-10	8.93893e-09	EXOSC9	exosome component 9 [Source:HGNC Symbol;Acc:HGNC:9137]	768.364	553.11	798.939	477.492	818.113	514.164	exosome component 9 [Source:HGNC Symbol;Acc:HGNC:9137]
ENSG00000090447	128.503	1.02638	0.163838	6.26462	3.73733e-10	9.45673e-09	TFAP4	transcription factor AP-4 [Source:HGNC Symbol;Acc:HGNC:11745]	79.5885	175.99	77.5136	175.498	81.5678	180.862	transcription factor AP-4 [Source:HGNC Symbol;Acc:HGNC:11745]
ENSG00000124795	3296.94	-0.522944	0.0835448	-6.25944	3.86352e-10	9.76012e-09	DEK	DEK proto-oncogene [Source:HGNC Symbol;Acc:HGNC:2768]	3719.09	3037.32	4058.78	2504.84	3934.73	2526.9	DEK proto-oncogene [Source:HGNC Symbol;Acc:HGNC:2768]
ENSG00000174137	93.946	-1.19244	0.190809	-6.2494	4.12027e-10	1.03918e-08	FAM53A	family with sequence similarity 53 member A [Source:HGNC Symbol;Acc:HGNC:31860]	144.301	51.4799	140.379	56.98	126.613	43.9235	family with sequence similarity 53 member A [Source:HGNC Symbol;Acc:HGNC:31860]
ENSG00000178035	839.014	0.562193	0.090015	6.24555	4.22318e-10	1.0634e-08	IMPDH2	inosine monophosphate dehydrogenase 2 [Source:HGNC Symbol;Acc:HGNC:6053]	651.585	948.189	670.157	1086.04	697.587	980.529	inosine monophosphate dehydrogenase 2 [Source:HGNC Symbol;Acc:HGNC:6053]
ENSG00000106034	3885.97	-0.439725	0.0704592	-6.24084	4.35217e-10	1.09411e-08	CPED1	cadherin like and PC-esterase domain containing 1 [Source:HGNC Symbol;Acc:HGNC:26159]	4497.12	3574.86	4540.95	3086.04	4415.62	3201.25	cadherin like and PC-esterase domain containing 1 [Source:HGNC Symbol;Acc:HGNC:26159]
ENSG00000058668	7896.97	0.405141	0.0649983	6.2331	4.57303e-10	1.14777e-08	ATP2B4	ATPase plasma membrane Ca2+ transporting 4 [Source:HGNC Symbol;Acc:HGNC:817]	6970.32	9365.76	7022	8664.38	6333.07	9026.29	ATPase plasma membrane Ca2+ transporting 4 [Source:HGNC Symbol;Acc:HGNC:817]
ENSG00000153214	2148	-0.427725	0.0686795	-6.22783	4.72932e-10	1.18317e-08	TMEM87B	transmembrane protein 87B [Source:HGNC Symbol;Acc:HGNC:25913]	2437.49	1889.19	2477.99	1865.52	2495.73	1722.06	transmembrane protein 87B [Source:HGNC Symbol;Acc:HGNC:25913]
ENSG00000186198	101.363	1.27224	0.204281	6.2279	4.72742e-10	1.18317e-08	SLC51B	solute carrier family 51 beta subunit [Source:HGNC Symbol;Acc:HGNC:29956]	45.3729	113.735	63.4757	169.8	41.3926	174.402	solute carrier family 51 beta subunit [Source:HGNC Symbol;Acc:HGNC:29956]
ENSG00000054356	143.9	1.12079	0.180037	6.22533	4.80532e-10	1.20025e-08	PTPRN	protein tyrosine phosphatase, receptor type N [Source:HGNC Symbol;Acc:HGNC:9676]	84.7952	155.637	76.2929	209.686	87.655	249.331	protein tyrosine phosphatase, receptor type N [Source:HGNC Symbol;Acc:HGNC:9676]
ENSG00000113758	2599.07	0.465268	0.0747596	6.22352	4.86121e-10	1.21225e-08	DBN1	drebrin 1 [Source:HGNC Symbol;Acc:HGNC:2695]	2337.08	2890.06	2162.44	3115.67	2019.72	3069.48	drebrin 1 [Source:HGNC Symbol;Acc:HGNC:2695]
ENSG00000102385	484.403	0.72986	0.11743	6.21529	5.12295e-10	1.27547e-08	DRP2	dystrophin related protein 2 [Source:HGNC Symbol;Acc:HGNC:3032]	394.967	556.702	365.595	659.828	309.227	620.097	dystrophin related protein 2 [Source:HGNC Symbol;Acc:HGNC:3032]
ENSG00000272886	2085.31	-0.549259	0.0884489	-6.20991	5.30162e-10	1.31784e-08	DCP1A	decapping mRNA 1A [Source:HGNC Symbol;Acc:HGNC:18714]	2658.41	1792.22	2535.97	1504.27	2270.51	1750.48	decapping mRNA 1A [Source:HGNC Symbol;Acc:HGNC:18714]
ENSG00000116237	1635.74	0.448404	0.0722257	6.20837	5.35356e-10	1.3269e-08	ICMT	isoprenylcysteine carboxyl methyltransferase [Source:HGNC Symbol;Acc:HGNC:5350]	1391.68	1871.24	1407.45	1981.76	1334.3	1827.99	isoprenylcysteine carboxyl methyltransferase [Source:HGNC Symbol;Acc:HGNC:5350]
ENSG00000138356	476.789	-0.733114	0.118086	-6.20833	5.35516e-10	1.3269e-08	AOX1	aldehyde oxidase 1 [Source:HGNC Symbol;Acc:HGNC:553]	589.848	379.515	677.481	347.578	536.887	329.427	aldehyde oxidase 1 [Source:HGNC Symbol;Acc:HGNC:553]
ENSG00000179889	1663.38	0.498085	0.0802321	6.20806	5.36433e-10	1.32705e-08	PDXDC1	pyridoxal dependent decarboxylase domain containing 1 [Source:HGNC Symbol;Acc:HGNC:28995]	1443.75	1874.83	1416	1955.55	1250.3	2039.86	pyridoxal dependent decarboxylase domain containing 1 [Source:HGNC Symbol;Acc:HGNC:28995]
ENSG00000198382	550.189	-0.616575	0.099361	-6.2054	5.45578e-10	1.34753e-08	UVRAG	UV radiation resistance associated [Source:HGNC Symbol;Acc:HGNC:12640]	682.081	458.531	651.846	406.837	678.109	423.733	UV radiation resistance associated [Source:HGNC Symbol;Acc:HGNC:12640]
ENSG00000053254	1137.66	0.511597	0.0824757	6.20301	5.53941e-10	1.36524e-08	FOXN3	forkhead box N3 [Source:HGNC Symbol;Acc:HGNC:1928]	961.757	1439.04	907.58	1268.37	928.899	1320.29	forkhead box N3 [Source:HGNC Symbol;Acc:HGNC:1928]
ENSG00000182718	8201.37	-0.325179	0.0524242	-6.20285	5.5451e-10	1.36524e-08	ANXA2	annexin A2 [Source:HGNC Symbol;Acc:HGNC:537]	9084.25	7209.59	9041.62	7357.26	9270.73	7244.8	annexin A2 [Source:HGNC Symbol;Acc:HGNC:537]
ENSG00000156521	1588.89	0.552712	0.0891356	6.2008	5.61773e-10	1.38093e-08	TYSND1	trypsin domain containing 1 [Source:HGNC Symbol;Acc:HGNC:28531]	1393.91	1715.6	1242.05	2003.42	1197.95	1980.44	trypsin domain containing 1 [Source:HGNC Symbol;Acc:HGNC:28531]
ENSG00000196141	4829.8	-0.387254	0.0624809	-6.19796	5.71985e-10	1.40159e-08	SPATS2L	spermatogenesis associated serine rich 2 like [Source:HGNC Symbol;Acc:HGNC:24574]	5366.65	4183.04	5340.5	4035.32	5747.49	4305.8	spermatogenesis associated serine rich 2 like [Source:HGNC Symbol;Acc:HGNC:24574]
ENSG00000141696	956.387	0.742095	0.11973	6.19808	5.71558e-10	1.40159e-08	P3H4	prolyl 3-hydroxylase family member 4 (non-enzymatic) [Source:HGNC Symbol;Acc:HGNC:16946]	752.744	1016.43	715.932	1457.55	634.281	1161.39	prolyl 3-hydroxylase family member 4 (non-enzymatic) [Source:HGNC Symbol;Acc:HGNC:16946]
ENSG00000149090	8060.91	0.413412	0.0667197	6.19625	5.78247e-10	1.4147e-08	PAMR1	peptidase domain containing associated with muscle regeneration 1 [Source:HGNC Symbol;Acc:HGNC:24554]	7127.26	8664.19	6488.56	9546.43	7069.62	9469.4	peptidase domain containing associated with muscle regeneration 1 [Source:HGNC Symbol;Acc:HGNC:24554]
ENSG00000170275	5185.14	0.402202	0.0649321	6.19419	5.85837e-10	1.43101e-08	CRTAP	cartilage associated protein [Source:HGNC Symbol;Acc:HGNC:2379]	4423.49	5701.1	4581.23	6313.38	4359.62	5732.02	cartilage associated protein [Source:HGNC Symbol;Acc:HGNC:2379]
ENSG00000142961	684.848	-0.694193	0.112096	-6.19285	5.90842e-10	1.44097e-08	MOB3C	MOB kinase activator 3C [Source:HGNC Symbol;Acc:HGNC:29800]	972.914	547.124	850.818	488.888	737.763	511.58	MOB kinase activator 3C [Source:HGNC Symbol;Acc:HGNC:29800]
ENSG00000125952	2198.76	-0.413726	0.0668176	-6.19187	5.9455e-10	1.44773e-08	MAX	MYC associated factor X [Source:HGNC Symbol;Acc:HGNC:6913]	2513.36	1967.01	2519.5	1809.68	2518.86	1864.17	MYC associated factor X [Source:HGNC Symbol;Acc:HGNC:6913]
ENSG00000152778	2858.24	-0.535439	0.0864947	-6.19043	5.99996e-10	1.4587e-08	IFIT5	interferon induced protein with tetratricopeptide repeats 5 [Source:HGNC Symbol;Acc:HGNC:13328]	3362.06	2499.77	3759.71	2191.45	3067.92	2268.52	interferon induced protein with tetratricopeptide repeats 5 [Source:HGNC Symbol;Acc:HGNC:13328]
ENSG00000168994	913.383	-0.536349	0.0867302	-6.18411	6.2454e-10	1.516e-08	PXDC1	PX domain containing 1 [Source:HGNC Symbol;Acc:HGNC:21361]	1153.66	732.691	1077.26	766.951	1026.29	723.447	PX domain containing 1 [Source:HGNC Symbol;Acc:HGNC:21361]
ENSG00000048392	2461.01	-0.438581	0.0710023	-6.177	6.53301e-10	1.58334e-08	RRM2B	ribonucleotide reductase regulatory TP53 inducible subunit M2B [Source:HGNC Symbol;Acc:HGNC:17296]	2938.08	2205.26	2874.1	2041.02	2703.91	2003.69	ribonucleotide reductase regulatory TP53 inducible subunit M2B [Source:HGNC Symbol;Acc:HGNC:17296]
ENSG00000171444	515.218	0.623376	0.101116	6.16496	7.05018e-10	1.70601e-08	MCC	mutated in colorectal cancers [Source:HGNC Symbol;Acc:HGNC:6935]	409.1	608.182	407.709	608.546	384.708	673.064	mutated in colorectal cancers [Source:HGNC Symbol;Acc:HGNC:6935]
ENSG00000170396	467.93	-0.746696	0.121132	-6.16433	7.07841e-10	1.71018e-08	ZNF804A	zinc finger protein 804A [Source:HGNC Symbol;Acc:HGNC:21711]	541.499	380.712	577.995	344.159	663.499	299.714	zinc finger protein 804A [Source:HGNC Symbol;Acc:HGNC:21711]
ENSG00000179195	888.309	0.528952	0.0858197	6.16352	7.11446e-10	1.71621e-08	ZNF664	zinc finger protein 664 [Source:HGNC Symbol;Acc:HGNC:25406]	698.445	1076.29	719.594	991.452	751.154	1092.92	zinc finger protein 664 [Source:HGNC Symbol;Acc:HGNC:25406]
ENSG00000163171	8970.87	-0.534796	0.0868041	-6.16095	7.23094e-10	1.7416e-08	CDC42EP3	CDC42 effector protein 3 [Source:HGNC Symbol;Acc:HGNC:16943]	10229	8344.54	11201.6	6466.09	10558.8	7025.18	CDC42 effector protein 3 [Source:HGNC Symbol;Acc:HGNC:16943]
ENSG00000125378	889.521	-0.645636	0.105032	-6.14703	7.89458e-10	1.89849e-08	BMP4	bone morphogenetic protein 4 [Source:HGNC Symbol;Acc:HGNC:1071]	984.815	745.86	1069.93	622.221	1229.6	684.691	bone morphogenetic protein 4 [Source:HGNC Symbol;Acc:HGNC:1071]
ENSG00000178078	159.63	-0.982398	0.159901	-6.14379	8.05752e-10	1.93468e-08	STAP2	signal transducing adaptor family member 2 [Source:HGNC Symbol;Acc:HGNC:30430]	208.269	114.932	211.179	98.0056	234.964	90.4308	signal transducing adaptor family member 2 [Source:HGNC Symbol;Acc:HGNC:30430]
ENSG00000129038	2198.97	0.751368	0.122361	6.14057	8.22282e-10	1.97132e-08	LOXL1	lysyl oxidase like 1 [Source:HGNC Symbol;Acc:HGNC:6665]	1762.1	2492.59	1711.4	3422.22	1336.74	2468.76	lysyl oxidase like 1 [Source:HGNC Symbol;Acc:HGNC:6665]
ENSG00000075240	368.856	0.748884	0.122007	6.13804	8.35477e-10	1.99986e-08	GRAMD4	GRAM domain containing 4 [Source:HGNC Symbol;Acc:HGNC:29113]	284.138	425.009	256.344	450.142	267.835	529.666	GRAM domain containing 4 [Source:HGNC Symbol;Acc:HGNC:29113]
ENSG00000130702	2707.47	0.546596	0.0892719	6.12282	9.19309e-10	2.19713e-08	LAMA5	laminin subunit alpha 5 [Source:HGNC Symbol;Acc:HGNC:6485]	2337.08	3180.98	2185.64	2896.86	2027.02	3617.23	laminin subunit alpha 5 [Source:HGNC Symbol;Acc:HGNC:6485]
ENSG00000146232	470.343	-0.78822	0.12885	-6.11734	9.51482e-10	2.27053e-08	NFKBIE	NFKB inhibitor epsilon [Source:HGNC Symbol;Acc:HGNC:7799]	702.908	289.724	554.191	363.532	555.148	356.556	NFKB inhibitor epsilon [Source:HGNC Symbol;Acc:HGNC:7799]
ENSG00000008300	314.772	0.744753	0.121785	6.11533	9.63587e-10	2.29588e-08	CELSR3	cadherin EGF LAG seven-pass G-type receptor 3 [Source:HGNC Symbol;Acc:HGNC:3230]	240.253	365.148	231.93	414.814	217.92	418.566	cadherin EGF LAG seven-pass G-type receptor 3 [Source:HGNC Symbol;Acc:HGNC:3230]
ENSG00000131171	1743.63	-0.552613	0.0903723	-6.11484	9.66514e-10	2.29932e-08	SH3BGRL	SH3 domain binding glutamate rich protein like [Source:HGNC Symbol;Acc:HGNC:10823]	1965.17	1509.68	2066.62	1229.63	2221.81	1468.86	SH3 domain binding glutamate rich protein like [Source:HGNC Symbol;Acc:HGNC:10823]
ENSG00000163297	7267.22	-0.354272	0.0579449	-6.11394	9.72029e-10	2.3089e-08	ANTXR2	anthrax toxin receptor 2 [Source:HGNC Symbol;Acc:HGNC:21732]	8415.56	6494.85	7911.88	6450.13	8173.83	6157.05	anthrax toxin receptor 2 [Source:HGNC Symbol;Acc:HGNC:21732]
ENSG00000196428	1844.39	-0.690341	0.112999	-6.10927	1.0009e-09	2.37386e-08	TSC22D2	TSC22 domain family member 2 [Source:HGNC Symbol;Acc:HGNC:29095]	2285.01	1465.38	2719.08	1451.85	1891.89	1253.11	TSC22 domain family member 2 [Source:HGNC Symbol;Acc:HGNC:29095]
ENSG00000169762	713.197	-0.552655	0.0904762	-6.10829	1.00703e-09	2.38473e-08	TAPT1	transmembrane anterior posterior transformation 1 [Source:HGNC Symbol;Acc:HGNC:26887]	826.382	593.815	878.283	545.868	852.201	582.633	transmembrane anterior posterior transformation 1 [Source:HGNC Symbol;Acc:HGNC:26887]
ENSG00000140553	1582.09	0.459719	0.0753275	6.10293	1.04139e-09	2.46236e-08	UNC45A	unc-45 myosin chaperone A [Source:HGNC Symbol;Acc:HGNC:30594]	1356.72	1723.98	1293.32	1932.76	1330.65	1855.12	unc-45 myosin chaperone A [Source:HGNC Symbol;Acc:HGNC:30594]
ENSG00000158864	1535.54	0.433406	0.0710384	6.10102	1.05394e-09	2.48823e-08	NDUFS2	NADH:ubiquinone oxidoreductase core subunit S2 [Source:HGNC Symbol;Acc:HGNC:7708]	1280.85	1745.53	1283.55	1739.03	1344.04	1820.24	NADH:ubiquinone oxidoreductase core subunit S2 [Source:HGNC Symbol;Acc:HGNC:7708]
ENSG00000114127	4242.54	-0.615685	0.100995	-6.0962	1.08622e-09	2.56054e-08	XRN1	5'-3' exoribonuclease 1 [Source:HGNC Symbol;Acc:HGNC:30654]	5252.1	3908.88	5260.55	2741.88	4997.55	3294.27	5'-3' exoribonuclease 1 [Source:HGNC Symbol;Acc:HGNC:30654]
ENSG00000032444	2157.24	0.469309	0.0770231	6.0931	1.10747e-09	2.60668e-08	PNPLA6	patatin like phospholipase domain containing 6 [Source:HGNC Symbol;Acc:HGNC:16268]	1904.92	2357.3	1819.43	2564.1	1675.18	2622.49	patatin like phospholipase domain containing 6 [Source:HGNC Symbol;Acc:HGNC:16268]
ENSG00000145623	5759.32	-0.375215	0.0616427	-6.08693	1.15095e-09	2.70492e-08	OSMR	oncostatin M receptor [Source:HGNC Symbol;Acc:HGNC:8507]	6500.97	5107.29	6271.88	4796.58	6775	5104.17	oncostatin M receptor [Source:HGNC Symbol;Acc:HGNC:8507]
ENSG00000186951	564.972	0.595817	0.0978888	6.08667	1.15284e-09	2.70525e-08	PPARA	peroxisome proliferator activated receptor alpha [Source:HGNC Symbol;Acc:HGNC:9232]	430.671	706.353	431.512	663.247	477.233	680.815	peroxisome proliferator activated receptor alpha [Source:HGNC Symbol;Acc:HGNC:9232]
ENSG00000163931	9420.86	0.365155	0.0600376	6.0821	1.18616e-09	2.77924e-08	TKT	transketolase [Source:HGNC Symbol;Acc:HGNC:11834]	8071.17	10697.1	8586.3	10977.8	7994.86	10198	transketolase [Source:HGNC Symbol;Acc:HGNC:11834]
ENSG00000184374	3979.42	0.47591	0.0783126	6.07705	1.22411e-09	2.86382e-08	COLEC10	collectin subfamily member 10 [Source:HGNC Symbol;Acc:HGNC:2220]	3476.61	4505.09	3522.9	4722.5	2932.79	4716.61	collectin subfamily member 10 [Source:HGNC Symbol;Acc:HGNC:2220]
ENSG00000105329	3006.62	0.695765	0.114525	6.07521	1.23829e-09	2.89264e-08	TGFB1	transforming growth factor beta 1 [Source:HGNC Symbol;Acc:HGNC:11766]	2532.7	3231.26	2260.1	4540.17	1977.11	3498.38	transforming growth factor beta 1 [Source:HGNC Symbol;Acc:HGNC:11766]
ENSG00000162804	991.634	0.661024	0.108865	6.07197	1.26353e-09	2.94717e-08	SNED1	sushi, nidogen and EGF like domains 1 [Source:HGNC Symbol;Acc:HGNC:24696]	838.283	1207.98	813.587	1189.74	614.802	1285.41	sushi, nidogen and EGF like domains 1 [Source:HGNC Symbol;Acc:HGNC:24696]
ENSG00000204574	2220.53	-0.456604	0.0752114	-6.07094	1.27166e-09	2.96167e-08	ABCF1	ATP binding cassette subfamily F member 1 [Source:HGNC Symbol;Acc:HGNC:70]	2756.59	1872.43	2572.6	1923.64	2398.34	1799.57	ATP binding cassette subfamily F member 1 [Source:HGNC Symbol;Acc:HGNC:70]
ENSG00000166920	791.312	-0.681566	0.112288	-6.06982	1.2805e-09	2.97778e-08	C15orf48	chromosome 15 open reading frame 48 [Source:HGNC Symbol;Acc:HGNC:29898]	1077.79	568.674	850.818	670.085	1026.29	554.212	chromosome 15 open reading frame 48 [Source:HGNC Symbol;Acc:HGNC:29898]
ENSG00000152558	13042.6	-0.453668	0.0748125	-6.06406	1.32727e-09	3.08194e-08	TMEM123	transmembrane protein 123 [Source:HGNC Symbol;Acc:HGNC:30138]	14147.4	11749.4	14806.9	10233.6	16412.2	10906	transmembrane protein 123 [Source:HGNC Symbol;Acc:HGNC:30138]
ENSG00000105379	314.491	0.752912	0.124277	6.05832	1.37552e-09	3.1892e-08	ETFB	electron transfer flavoprotein beta subunit [Source:HGNC Symbol;Acc:HGNC:3482]	240.253	377.12	242.306	418.233	202.093	406.939	electron transfer flavoprotein beta subunit [Source:HGNC Symbol;Acc:HGNC:3482]
ENSG00000133318	2983.6	-0.391283	0.064638	-6.05345	1.41779e-09	3.28229e-08	RTN3	reticulon 3 [Source:HGNC Symbol;Acc:HGNC:10469]	3275.77	2574	3365.43	2510.54	3537.85	2638	reticulon 3 [Source:HGNC Symbol;Acc:HGNC:10469]
ENSG00000109118	877.839	0.537588	0.0889513	6.04362	1.5069e-09	3.48339e-08	PHF12	PHD finger protein 12 [Source:HGNC Symbol;Acc:HGNC:20816]	652.328	1041.57	718.374	1043.87	765.764	1045.12	PHD finger protein 12 [Source:HGNC Symbol;Acc:HGNC:20816]
ENSG00000136114	139.029	-1.0219	0.169208	-6.03932	1.5476e-09	3.57215e-08	THSD1	thrombospondin type 1 domain containing 1 [Source:HGNC Symbol;Acc:HGNC:17754]	208.269	74.2269	192.868	86.6096	175.31	96.8902	thrombospondin type 1 domain containing 1 [Source:HGNC Symbol;Acc:HGNC:17754]
ENSG00000256235	2231	0.495441	0.082051	6.03821	1.55838e-09	3.59167e-08	SMIM3	small integral membrane protein 3 [Source:HGNC Symbol;Acc:HGNC:30248]	2020.95	2478.22	1707.13	2758.97	1796.93	2623.79	small integral membrane protein 3 [Source:HGNC Symbol;Acc:HGNC:30248]
ENSG00000149289	3100.19	-0.457316	0.0757561	-6.03669	1.57308e-09	3.62018e-08	ZC3H12C	zinc finger CCCH-type containing 12C [Source:HGNC Symbol;Acc:HGNC:29362]	3928.1	2716.46	3444.78	2584.61	3420.98	2506.23	zinc finger CCCH-type containing 12C [Source:HGNC Symbol;Acc:HGNC:29362]
ENSG00000155324	428.683	-0.684166	0.113365	-6.03509	1.58875e-09	3.65084e-08	GRAMD3	GRAM domain containing 3 [Source:HGNC Symbol;Acc:HGNC:24911]	511.003	350.782	543.205	287.179	546.626	333.302	GRAM domain containing 3 [Source:HGNC Symbol;Acc:HGNC:24911]
ENSG00000185201	7598.65	-0.409543	0.0678734	-6.03393	1.60022e-09	3.67175e-08	IFITM2	interferon induced transmembrane protein 2 [Source:HGNC Symbol;Acc:HGNC:5413]	8697.46	6215.9	8125.5	6541.3	9248.82	6762.93	interferon induced transmembrane protein 2 [Source:HGNC Symbol;Acc:HGNC:5413]
ENSG00000007237	1260.33	0.516727	0.085675	6.03124	1.62704e-09	3.72777e-08	GAS7	growth arrest specific 7 [Source:HGNC Symbol;Acc:HGNC:4169]	1114.24	1419.89	1033.31	1522.51	939.856	1532.16	growth arrest specific 7 [Source:HGNC Symbol;Acc:HGNC:4169]
ENSG00000047648	532.782	0.760939	0.12619	6.03008	1.63877e-09	3.74912e-08	ARHGAP6	Rho GTPase activating protein 6 [Source:HGNC Symbol;Acc:HGNC:676]	427.695	556.702	380.244	747.577	349.402	735.074	Rho GTPase activating protein 6 [Source:HGNC Symbol;Acc:HGNC:676]
ENSG00000102471	1055.42	-0.557619	0.0924979	-6.02845	1.65543e-09	3.77682e-08	NDFIP2	Nedd4 family interacting protein 2 [Source:HGNC Symbol;Acc:HGNC:18537]	1152.17	908.681	1279.89	799.999	1361.09	830.672	Nedd4 family interacting protein 2 [Source:HGNC Symbol;Acc:HGNC:18537]
ENSG00000072778	4002.9	0.583477	0.0967878	6.02842	1.65575e-09	3.77682e-08	ACADVL	acyl-CoA dehydrogenase, very long chain [Source:HGNC Symbol;Acc:HGNC:92]	3487.02	4456.01	3274.49	5457.54	2757.48	4584.84	acyl-CoA dehydrogenase, very long chain [Source:HGNC Symbol;Acc:HGNC:92]
ENSG00000182749	591.711	0.634608	0.105302	6.02658	1.67464e-09	3.81428e-08	PAQR7	progestin and adipoQ receptor family member 7 [Source:HGNC Symbol;Acc:HGNC:23146]	502.077	677.62	421.747	774.928	450.449	723.447	progestin and adipoQ receptor family member 7 [Source:HGNC Symbol;Acc:HGNC:23146]
ENSG00000155850	392.006	0.685162	0.113925	6.01417	1.80814e-09	4.10763e-08	SLC26A2	solute carrier family 26 member 2 [Source:HGNC Symbol;Acc:HGNC:10994]	275.213	499.236	320.43	503.703	290.966	462.489	solute carrier family 26 member 2 [Source:HGNC Symbol;Acc:HGNC:10994]
ENSG00000110492	3152.61	-0.541271	0.0900001	-6.01411	1.80872e-09	4.10763e-08	MDK	midkine (neurite growth-promoting factor 2) [Source:HGNC Symbol;Acc:HGNC:6972]	3629.83	2328.57	3580.27	2411.39	4058.91	2906.71	midkine (neurite growth-promoting factor 2) [Source:HGNC Symbol;Acc:HGNC:6972]
ENSG00000108387	137.857	-1.03801	0.172624	-6.01312	1.81984e-09	4.12683e-08	SEPT4	septin 4 [Source:HGNC Symbol;Acc:HGNC:9165]	198.599	82.6073	170.286	71.7948	206.963	96.8902	septin 4 [Source:HGNC Symbol;Acc:HGNC:9165]
ENSG00000221988	419.586	0.669676	0.111441	6.00924	1.8639e-09	4.22058e-08	PPT2	palmitoyl-protein thioesterase 2 [Source:HGNC Symbol;Acc:HGNC:9326]	328.768	471.7	321.651	535.612	305.575	554.212	palmitoyl-protein thioesterase 2 [Source:HGNC Symbol;Acc:HGNC:9326]
ENSG00000113407	2409.97	-0.435933	0.0725509	-6.00865	1.87074e-09	4.22989e-08	TARS	threonyl-tRNA synthetase [Source:HGNC Symbol;Acc:HGNC:11572]	2707.5	2144.2	2942.46	1946.44	2683.22	2035.99	threonyl-tRNA synthetase [Source:HGNC Symbol;Acc:HGNC:11572]
ENSG00000065882	607.013	-0.64876	0.108048	-6.00435	1.92103e-09	4.33727e-08	TBC1D1	TBC1 domain family member 1 [Source:HGNC Symbol;Acc:HGNC:11578]	768.364	507.616	675.039	426.21	801.069	463.781	TBC1 domain family member 1 [Source:HGNC Symbol;Acc:HGNC:11578]
ENSG00000144642	1048.68	-0.646988	0.107838	-5.99962	1.97783e-09	4.45903e-08	RBMS3	RNA binding motif single stranded interacting protein 3 [Source:HGNC Symbol;Acc:HGNC:13427]	1210.94	870.37	1304.91	662.107	1356.22	887.514	RNA binding motif single stranded interacting protein 3 [Source:HGNC Symbol;Acc:HGNC:13427]
ENSG00000135052	2123.83	-0.390063	0.0650601	-5.99543	2.02953e-09	4.56894e-08	GOLM1	golgi membrane protein 1 [Source:HGNC Symbol;Acc:HGNC:15451]	2426.33	1856.87	2365.69	1796.01	2450.69	1847.37	golgi membrane protein 1 [Source:HGNC Symbol;Acc:HGNC:15451]
ENSG00000134917	176.826	-1.17213	0.195666	-5.99047	2.09242e-09	4.70369e-08	ADAMTS8	ADAM metallopeptidase with thrombospondin type 1 motif 8 [Source:HGNC Symbol;Acc:HGNC:224]	231.327	98.171	213.62	63.8176	328.706	125.311	ADAM metallopeptidase with thrombospondin type 1 motif 8 [Source:HGNC Symbol;Acc:HGNC:224]
ENSG00000170456	698.46	0.568733	0.0949796	5.98795	2.12509e-09	4.76333e-08	DENND5B	DENN domain containing 5B [Source:HGNC Symbol;Acc:HGNC:28338]	551.913	846.426	603.629	854.7	513.756	820.337	DENN domain containing 5B [Source:HGNC Symbol;Acc:HGNC:28338]
ENSG00000087303	4675.62	0.512149	0.0855286	5.98804	2.12383e-09	4.76333e-08	NID2	nidogen 2 [Source:HGNC Symbol;Acc:HGNC:13389]	4120.01	5077.36	3992.25	5863.24	3373.5	5627.38	nidogen 2 [Source:HGNC Symbol;Acc:HGNC:13389]
ENSG00000116711	321.637	0.768845	0.128462	5.98499	2.164e-09	4.84354e-08	PLA2G4A	phospholipase A2 group IVA [Source:HGNC Symbol;Acc:HGNC:9035]	265.543	404.656	224.606	436.467	204.528	394.02	phospholipase A2 group IVA [Source:HGNC Symbol;Acc:HGNC:9035]
ENSG00000279117	306.437	0.716271	0.119691	5.98432	2.17294e-09	4.85655e-08	CTD-2562J17.6		226.864	360.36	230.099	394.301	225.225	401.771
ENSG00000126778	1325.92	-0.494021	0.0825647	-5.98344	2.18468e-09	4.87577e-08	SIX1	SIX homeobox 1 [Source:HGNC Symbol;Acc:HGNC:10887]	1555.32	1095.45	1469.71	1029.06	1647.18	1158.81	SIX homeobox 1 [Source:HGNC Symbol;Acc:HGNC:10887]
ENSG00000139163	1110.35	-0.488032	0.0815802	-5.98223	2.20098e-09	4.90509e-08	ETNK1	ethanolamine kinase 1 [Source:HGNC Symbol;Acc:HGNC:24649]	1255.56	972.133	1336.65	870.654	1311.17	915.935	ethanolamine kinase 1 [Source:HGNC Symbol;Acc:HGNC:24649]
ENSG00000164292	5075.93	-0.498358	0.0833548	-5.97875	2.24857e-09	4.99678e-08	RHOBTB3	Rho related BTB domain containing 3 [Source:HGNC Symbol;Acc:HGNC:18757]	5510.95	4440.44	6210.85	3696.86	6180.89	4415.61	Rho related BTB domain containing 3 [Source:HGNC Symbol;Acc:HGNC:18757]
ENSG00000102218	1288.49	-0.473856	0.0792536	-5.97898	2.24539e-09	4.99678e-08	RP2	retinitis pigmentosa 2 (X-linked recessive) [Source:HGNC Symbol;Acc:HGNC:10274]	1463.09	1128.97	1548.44	1003.99	1497.44	1089.05	retinitis pigmentosa 2 (X-linked recessive) [Source:HGNC Symbol;Acc:HGNC:10274]
ENSG00000164403	396.24	0.76949	0.128778	5.9753	2.29664e-09	5.09631e-08	SHROOM1	shroom family member 1 [Source:HGNC Symbol;Acc:HGNC:24084]	303.478	440.572	306.392	562.962	244.703	519.331	shroom family member 1 [Source:HGNC Symbol;Acc:HGNC:24084]
ENSG00000197927	135.952	-1.04001	0.174114	-5.97317	2.32694e-09	5.15617e-08	C2orf27A	chromosome 2 open reading frame 27A [Source:HGNC Symbol;Acc:HGNC:25077]	175.541	94.5794	176.999	71.7948	216.703	80.0959	chromosome 2 open reading frame 27A [Source:HGNC Symbol;Acc:HGNC:25077]
ENSG00000140526	2858.33	0.4937	0.0827607	5.96539	2.44045e-09	5.39997e-08	ABHD2	abhydrolase domain containing 2 [Source:HGNC Symbol;Acc:HGNC:18717]	2395.09	3098.37	2504.24	3677.49	2179.2	3295.56	abhydrolase domain containing 2 [Source:HGNC Symbol;Acc:HGNC:18717]
ENSG00000158156	1001.65	0.54562	0.0915058	5.96269	2.48123e-09	5.48238e-08	XKR8	XK related 8 [Source:HGNC Symbol;Acc:HGNC:25508]	847.209	1094.25	787.342	1312.82	790.112	1178.18	XK related 8 [Source:HGNC Symbol;Acc:HGNC:25508]
ENSG00000139625	1389.56	0.466535	0.0782624	5.96116	2.50457e-09	5.52609e-08	MAP3K12	mitogen-activated protein kinase kinase kinase 12 [Source:HGNC Symbol;Acc:HGNC:6851]	1234.74	1636.58	1152.94	1562.39	1093.25	1657.47	mitogen-activated protein kinase kinase kinase 12 [Source:HGNC Symbol;Acc:HGNC:6851]
ENSG00000154188	740.049	-0.785957	0.131943	-5.95679	2.5724e-09	5.66768e-08	ANGPT1	angiopoietin 1 [Source:HGNC Symbol;Acc:HGNC:484]	905.226	676.422	921.618	444.444	1027.51	465.073	angiopoietin 1 [Source:HGNC Symbol;Acc:HGNC:484]
ENSG00000176014	4405.06	-0.352247	0.0591596	-5.95418	2.61385e-09	5.75084e-08	TUBB6	tubulin beta 6 class V [Source:HGNC Symbol;Acc:HGNC:20776]	4930.77	3850.22	4870.54	3988.6	5043.81	3746.42	tubulin beta 6 class V [Source:HGNC Symbol;Acc:HGNC:20776]
ENSG00000128283	1872.33	-0.454178	0.0763274	-5.95039	2.67507e-09	5.8772e-08	CDC42EP1	CDC42 effector protein 1 [Source:HGNC Symbol;Acc:HGNC:17014]	2313.27	1492.92	2104.46	1645.58	2095.2	1582.54	CDC42 effector protein 1 [Source:HGNC Symbol;Acc:HGNC:17014]
ENSG00000102699	4238.68	-0.362478	0.0609415	-5.94797	2.71486e-09	5.95617e-08	PARP4	poly(ADP-ribose) polymerase family member 4 [Source:HGNC Symbol;Acc:HGNC:271]	4829.61	3845.43	4713.68	3539.6	4784.5	3719.29	poly(ADP-ribose) polymerase family member 4 [Source:HGNC Symbol;Acc:HGNC:271]
ENSG00000187498	41457	0.460692	0.0774686	5.94682	2.73394e-09	5.98956e-08	COL4A1	collagen type IV alpha 1 chain [Source:HGNC Symbol;Acc:HGNC:2202]	37708.6	43439.5	33683	50862.6	32824.4	50224	collagen type IV alpha 1 chain [Source:HGNC Symbol;Acc:HGNC:2202]
ENSG00000171451	1834.65	0.489395	0.08236	5.94215	2.81308e-09	6.15426e-08	DSEL	dermatan sulfate epimerase-like [Source:HGNC Symbol;Acc:HGNC:18144]	1565.74	2317.79	1594.83	2078.63	1389.09	2061.82	dermatan sulfate epimerase-like [Source:HGNC Symbol;Acc:HGNC:18144]
ENSG00000185070	1296.86	0.562997	0.094787	5.9396	2.8572e-09	6.24198e-08	FLRT2	fibronectin leucine rich transmembrane protein 2 [Source:HGNC Symbol;Acc:HGNC:3761]	951.343	1644.96	1173.08	1468.94	986.118	1556.7	fibronectin leucine rich transmembrane protein 2 [Source:HGNC Symbol;Acc:HGNC:3761]
ENSG00000143933	10574.5	-0.352924	0.0594341	-5.93807	2.88399e-09	6.29165e-08	CALM2	calmodulin 2 [Source:HGNC Symbol;Acc:HGNC:1445]	11291.2	9418.43	12478.5	9152.13	11866.3	9240.74	calmodulin 2 [Source:HGNC Symbol;Acc:HGNC:1445]
ENSG00000130589	20850	-0.537578	0.0905595	-5.93618	2.91742e-09	6.35563e-08	HELZ2	helicase with zinc finger 2 [Source:HGNC Symbol;Acc:HGNC:30021]	27773.4	17078.2	25700.9	15913.4	20964.1	17670.2	helicase with zinc finger 2 [Source:HGNC Symbol;Acc:HGNC:30021]
ENSG00000119326	789.756	-0.584248	0.0984781	-5.93277	2.97872e-09	6.48008e-08	CTNNAL1	catenin alpha like 1 [Source:HGNC Symbol;Acc:HGNC:2512]	890.35	693.183	1006.46	601.709	964.205	582.633	catenin alpha like 1 [Source:HGNC Symbol;Acc:HGNC:2512]
ENSG00000126088	1166.42	0.45794	0.0772369	5.92903	3.04729e-09	6.61996e-08	UROD	uroporphyrinogen decarboxylase [Source:HGNC Symbol;Acc:HGNC:12591]	987.79	1389.96	953.966	1377.78	995.858	1293.16	uroporphyrinogen decarboxylase [Source:HGNC Symbol;Acc:HGNC:12591]
ENSG00000067221	463.349	-0.617844	0.104415	-5.9172	3.27464e-09	7.1039e-08	STOML1	stomatin like 1 [Source:HGNC Symbol;Acc:HGNC:14560]	551.913	384.304	570.06	355.555	574.627	343.637	stomatin like 1 [Source:HGNC Symbol;Acc:HGNC:14560]
ENSG00000145901	5100.9	-0.472501	0.0799303	-5.91142	3.39178e-09	7.34776e-08	TNIP1	TNFAIP3 interacting protein 1 [Source:HGNC Symbol;Acc:HGNC:16903]	6566.42	4070.51	5344.77	4390.88	5938.62	4294.17	TNFAIP3 interacting protein 1 [Source:HGNC Symbol;Acc:HGNC:16903]
ENSG00000166197	980.353	0.543615	0.0919701	5.91078	3.40482e-09	7.36571e-08	NOLC1	nucleolar and coiled-body phosphoprotein 1 [Source:HGNC Symbol;Acc:HGNC:15608]	756.463	1106.22	791.004	1292.31	830.287	1105.84	nucleolar and coiled-body phosphoprotein 1 [Source:HGNC Symbol;Acc:HGNC:15608]
ENSG00000103742	463.801	0.652202	0.11046	5.9044	3.53931e-09	7.64598e-08	IGDCC4	immunoglobulin superfamily DCC subclass member 4 [Source:HGNC Symbol;Acc:HGNC:13770]	383.81	536.349	329.585	614.244	354.272	564.547	immunoglobulin superfamily DCC subclass member 4 [Source:HGNC Symbol;Acc:HGNC:13770]
ENSG00000170145	1751.17	0.430393	0.0729213	5.90215	3.58788e-09	7.74015e-08	SIK2	salt inducible kinase 2 [Source:HGNC Symbol;Acc:HGNC:21680]	1509.95	2073.56	1402.57	1981.76	1551.01	1988.19	salt inducible kinase 2 [Source:HGNC Symbol;Acc:HGNC:21680]
ENSG00000075618	4263.86	0.437042	0.0740903	5.89878	3.66198e-09	7.88903e-08	FSCN1	fascin actin-bundling protein 1 [Source:HGNC Symbol;Acc:HGNC:11148]	3690.08	4769.68	3843.94	5164.67	3287.06	4827.71	fascin actin-bundling protein 1 [Source:HGNC Symbol;Acc:HGNC:11148]
ENSG00000124201	18881.1	-0.451679	0.0766031	-5.89635	3.7163e-09	7.99495e-08	ZNFX1	zinc finger NFX1-type containing 1 [Source:HGNC Symbol;Acc:HGNC:29271]	23172.2	17072.2	22052.3	14329.3	20411.4	16249.1	zinc finger NFX1-type containing 1 [Source:HGNC Symbol;Acc:HGNC:29271]
ENSG00000143106	2273.37	-0.432292	0.0733999	-5.88955	3.87253e-09	8.31912e-08	PSMA5	proteasome subunit alpha 5 [Source:HGNC Symbol;Acc:HGNC:9534]	2594.44	2053.21	2551.84	1933.9	2712.43	1794.41	proteasome subunit alpha 5 [Source:HGNC Symbol;Acc:HGNC:9534]
ENSG00000063601	926.506	-0.516255	0.0876594	-5.88933	3.87772e-09	8.31912e-08	MTMR1	myotubularin related protein 1 [Source:HGNC Symbol;Acc:HGNC:7449]	1024.98	787.763	1105.94	757.834	1157.78	724.739	myotubularin related protein 1 [Source:HGNC Symbol;Acc:HGNC:7449]
ENSG00000103044	78.0729	-1.19126	0.202423	-5.88497	3.98124e-09	8.52941e-08	HAS3	hyaluronan synthase 3 [Source:HGNC Symbol;Acc:HGNC:4820]	121.242	38.3107	116.575	49.0028	107.134	36.1723	hyaluronan synthase 3 [Source:HGNC Symbol;Acc:HGNC:4820]
ENSG00000173320	107.683	1.09938	0.186824	5.88456	3.99122e-09	8.53902e-08	STOX2	storkhead box 2 [Source:HGNC Symbol;Acc:HGNC:25450]	67.6874	122.115	58.5929	167.521	59.6541	170.527	storkhead box 2 [Source:HGNC Symbol;Acc:HGNC:25450]
ENSG00000137959	7884.82	-0.544439	0.0925672	-5.88155	4.06433e-09	8.68345e-08	IFI44L	interferon induced protein 44 like [Source:HGNC Symbol;Acc:HGNC:17817]	8970.44	7177.26	10139.6	5423.35	9102.73	6495.52	interferon induced protein 44 like [Source:HGNC Symbol;Acc:HGNC:17817]
ENSG00000140092	4513.03	-0.37366	0.0635398	-5.88072	4.08489e-09	8.71537e-08	FBLN5	fibulin 5 [Source:HGNC Symbol;Acc:HGNC:3602]	5043.09	4076.49	4929.13	3890.59	5342.08	3796.8	fibulin 5 [Source:HGNC Symbol;Acc:HGNC:3602]
ENSG00000141503	3742.94	0.468231	0.0797156	5.87377	4.25986e-09	9.07619e-08	MINK1	misshapen like kinase 1 [Source:HGNC Symbol;Acc:HGNC:17565]	3375.45	4159.1	3205.52	4560.68	2790.35	4366.52	misshapen like kinase 1 [Source:HGNC Symbol;Acc:HGNC:17565]
ENSG00000135679	5384.1	-0.549731	0.0936072	-5.87275	4.28637e-09	9.12015e-08	MDM2	MDM2 proto-oncogene [Source:HGNC Symbol;Acc:HGNC:6973]	6889.99	4845.1	6837.06	4037.6	5567.31	4127.52	MDM2 proto-oncogene [Source:HGNC Symbol;Acc:HGNC:6973]
ENSG00000141569	382.074	0.646315	0.110122	5.86908	4.3823e-09	9.3115e-08	TRIM65	tripartite motif containing 65 [Source:HGNC Symbol;Acc:HGNC:27316]	301.99	471.7	296.627	451.281	281.226	489.618	tripartite motif containing 65 [Source:HGNC Symbol;Acc:HGNC:27316]
ENSG00000184524	118.058	1.11994	0.191	5.86354	4.53101e-09	9.61431e-08	CEND1	cell cycle exit and neuronal differentiation 1 [Source:HGNC Symbol;Acc:HGNC:24153]	77.3571	154.44	76.2929	184.615	43.8275	171.819	cell cycle exit and neuronal differentiation 1 [Source:HGNC Symbol;Acc:HGNC:24153]
ENSG00000184677	1117.98	0.450806	0.0769905	5.85535	4.76014e-09	1.00867e-07	ZBTB40	zinc finger and BTB domain containing 40 [Source:HGNC Symbol;Acc:HGNC:29045]	966.219	1291.79	944.2	1269.51	909.42	1326.75	zinc finger and BTB domain containing 40 [Source:HGNC Symbol;Acc:HGNC:29045]
ENSG00000049130	753.299	0.577434	0.0986493	5.85341	4.81603e-09	1.01912e-07	KITLG	KIT ligand [Source:HGNC Symbol;Acc:HGNC:6343]	571.252	955.372	664.053	905.982	557.583	865.552	KIT ligand [Source:HGNC Symbol;Acc:HGNC:6343]
ENSG00000111144	804.896	0.511604	0.087412	5.85279	4.83393e-09	1.02151e-07	LTA4H	leukotriene A4 hydrolase [Source:HGNC Symbol;Acc:HGNC:6710]	658.279	895.511	665.884	1005.13	653.76	950.816	leukotriene A4 hydrolase [Source:HGNC Symbol;Acc:HGNC:6710]
ENSG00000108960	1165.8	0.538633	0.0920703	5.85024	4.90861e-09	1.03588e-07	MMD	monocyte to macrophage differentiation associated [Source:HGNC Symbol;Acc:HGNC:7153]	922.334	1258.27	968.004	1347.01	938.639	1560.58	monocyte to macrophage differentiation associated [Source:HGNC Symbol;Acc:HGNC:7153]
ENSG00000225697	1908.19	0.481729	0.0823512	5.84969	4.92486e-09	1.0379e-07	SLC26A6	solute carrier family 26 member 6 [Source:HGNC Symbol;Acc:HGNC:14472]	1620.04	2026.87	1638.16	2272.36	1490.13	2401.58	solute carrier family 26 member 6 [Source:HGNC Symbol;Acc:HGNC:14472]
ENSG00000149115	4442.43	0.418757	0.0715927	5.84916	4.94076e-09	1.03984e-07	TNKS1BP1	tankyrase 1 binding protein 1 [Source:HGNC Symbol;Acc:HGNC:19081]	4130.42	4982.78	3690.13	5225.06	3543.94	5082.21	tankyrase 1 binding protein 1 [Source:HGNC Symbol;Acc:HGNC:19081]
ENSG00000167772	194.472	1.14999	0.196716	5.84594	5.0371e-09	1.05868e-07	ANGPTL4	angiopoietin like 4 [Source:HGNC Symbol;Acc:HGNC:16039]	144.301	247.822	81.1756	373.789	94.9596	224.785	angiopoietin like 4 [Source:HGNC Symbol;Acc:HGNC:16039]
ENSG00000263528	1908.46	-0.499748	0.0855833	-5.83932	5.24157e-09	1.10016e-07	IKBKE	inhibitor of kappa light polypeptide gene enhancer in B-cells, kinase epsilon [Source:HGNC Symbol;Acc:HGNC:14552]	2415.18	1553.98	2047.7	1471.22	2272.94	1689.76	inhibitor of kappa light polypeptide gene enhancer in B-cells, kinase epsilon [Source:HGNC Symbol;Acc:HGNC:14552]
ENSG00000198959	6024.97	-0.545498	0.0935438	-5.83147	5.49404e-09	1.15159e-07	TGM2	transglutaminase 2 [Source:HGNC Symbol;Acc:HGNC:11778]	7451.57	4721.79	6578.28	4260.96	7539.55	5597.67	transglutaminase 2 [Source:HGNC Symbol;Acc:HGNC:11778]
ENSG00000184840	3538.12	0.414623	0.0711253	5.82948	5.5602e-09	1.16389e-07	TMED9	transmembrane p24 trafficking protein 9 [Source:HGNC Symbol;Acc:HGNC:24878]	3083.13	3737.68	2984.58	4345.29	3002.18	4075.85	transmembrane p24 trafficking protein 9 [Source:HGNC Symbol;Acc:HGNC:24878]
ENSG00000176928	382.674	-0.726596	0.124652	-5.82899	5.57644e-09	1.16572e-07	GCNT4	glucosaminyl (N-acetyl) transferase 4, core 2 [Source:HGNC Symbol;Acc:HGNC:17973]	454.473	314.866	524.895	245.014	468.711	288.087	glucosaminyl (N-acetyl) transferase 4, core 2 [Source:HGNC Symbol;Acc:HGNC:17973]
ENSG00000278053	1309.73	-0.46881	0.0805386	-5.82093	5.85197e-09	1.22167e-07	DDX52	DExD-box helicase 52 [Source:HGNC Symbol;Acc:HGNC:20038]	1502.51	1163.69	1597.88	1033.62	1475.53	1085.17	DExD-box helicase 52 [Source:HGNC Symbol;Acc:HGNC:20038]
ENSG00000124766	1240.85	0.526922	0.0905397	5.81978	5.89241e-09	1.22846e-07	SOX4	SRY-box 4 [Source:HGNC Symbol;Acc:HGNC:11200]	1083	1406.72	946.642	1389.17	998.293	1621.3	SRY-box 4 [Source:HGNC Symbol;Acc:HGNC:11200]
ENSG00000125818	3828.92	-0.385952	0.0663336	-5.81836	5.9429e-09	1.23732e-07	PSMF1	proteasome inhibitor subunit 1 [Source:HGNC Symbol;Acc:HGNC:9571]	4311.17	3373.73	4163.15	3160.11	4569.02	3396.32	proteasome inhibitor subunit 1 [Source:HGNC Symbol;Acc:HGNC:9571]
ENSG00000100226	4846.71	-0.490723	0.0843793	-5.81568	6.03874e-09	1.25559e-07	GTPBP1	GTP binding protein 1 [Source:HGNC Symbol;Acc:HGNC:4669]	6267.41	4217.76	5653.61	3668.37	5132.69	4140.44	GTP binding protein 1 [Source:HGNC Symbol;Acc:HGNC:4669]
ENSG00000174564	76.0957	-1.17136	0.201463	-5.81425	6.09058e-09	1.26467e-07	IL20RB	interleukin 20 receptor subunit beta [Source:HGNC Symbol;Acc:HGNC:6004]	104.135	43.0995	112.303	37.6068	118.091	41.3398	interleukin 20 receptor subunit beta [Source:HGNC Symbol;Acc:HGNC:6004]
ENSG00000114251	2709.93	0.559527	0.0962987	5.81033	6.23506e-09	1.29294e-07	WNT5A	Wnt family member 5A [Source:HGNC Symbol;Acc:HGNC:12784]	2365.34	2837.38	2150.85	3679.77	1996.59	3229.67	Wnt family member 5A [Source:HGNC Symbol;Acc:HGNC:12784]
ENSG00000162613	1580.26	-0.46054	0.079315	-5.80646	6.38065e-09	1.32136e-07	FUBP1	far upstream element binding protein 1 [Source:HGNC Symbol;Acc:HGNC:4004]	1829.79	1391.16	1907.93	1218.23	1768.93	1365.51	far upstream element binding protein 1 [Source:HGNC Symbol;Acc:HGNC:4004]
ENSG00000130830	631.5	0.537677	0.0926384	5.80404	6.47359e-09	1.33883e-07	MPP1	membrane palmitoylated protein 1 [Source:HGNC Symbol;Acc:HGNC:7219]	509.515	787.763	523.674	724.785	499.146	744.117	membrane palmitoylated protein 1 [Source:HGNC Symbol;Acc:HGNC:7219]
ENSG00000184584	4933.19	-0.333688	0.0575255	-5.80069	6.60444e-09	1.36407e-07	TMEM173	transmembrane protein 173 [Source:HGNC Symbol;Acc:HGNC:27962]	5489.38	4344.67	5352.71	4356.69	5686.62	4369.1	transmembrane protein 173 [Source:HGNC Symbol;Acc:HGNC:27962]
ENSG00000140750	2514.46	-0.410392	0.0707589	-5.79986	6.63693e-09	1.36895e-07	ARHGAP17	Rho GTPase activating protein 17 [Source:HGNC Symbol;Acc:HGNC:18239]	2820.56	2200.47	2909.5	1995.44	2898.7	2262.06	Rho GTPase activating protein 17 [Source:HGNC Symbol;Acc:HGNC:18239]
ENSG00000154096	2748.79	0.382573	0.0659681	5.79936	6.65683e-09	1.37124e-07	THY1	Thy-1 cell surface antigen [Source:HGNC Symbol;Acc:HGNC:11801]	2466.5	3028.94	2405.97	3176.06	2264.42	3150.87	Thy-1 cell surface antigen [Source:HGNC Symbol;Acc:HGNC:11801]
ENSG00000168890	340.264	0.715395	0.123479	5.79367	6.88628e-09	1.41662e-07	TMEM150A	transmembrane protein 150A [Source:HGNC Symbol;Acc:HGNC:24677]	270.006	391.487	238.034	475.213	249.573	417.274	transmembrane protein 150A [Source:HGNC Symbol;Acc:HGNC:24677]
ENSG00000176641	389.904	0.720613	0.12441	5.79226	6.94464e-09	1.42673e-07	RNF152	ring finger protein 152 [Source:HGNC Symbol;Acc:HGNC:26811]	307.941	451.347	247.189	516.239	312.88	503.829	ring finger protein 152 [Source:HGNC Symbol;Acc:HGNC:26811]
ENSG00000135698	948.628	0.473298	0.0817232	5.79148	6.97704e-09	1.43149e-07	MPHOSPH6	M-phase phosphoprotein 6 [Source:HGNC Symbol;Acc:HGNC:7214]	796.629	1100.23	810.535	1148.72	762.111	1073.54	M-phase phosphoprotein 6 [Source:HGNC Symbol;Acc:HGNC:7214]
ENSG00000169252	507.884	-0.723099	0.125035	-5.78317	7.33077e-09	1.50208e-07	ADRB2	adrenoceptor beta 2 [Source:HGNC Symbol;Acc:HGNC:286]	694.726	387.895	584.709	428.489	644.021	307.465	adrenoceptor beta 2 [Source:HGNC Symbol;Acc:HGNC:286]
ENSG00000169258	327.731	0.769644	0.133162	5.77974	7.48171e-09	1.53099e-07	GPRIN1	G protein regulated inducer of neurite outgrowth 1 [Source:HGNC Symbol;Acc:HGNC:24835]	269.262	380.712	233.151	462.677	203.311	417.274	G protein regulated inducer of neurite outgrowth 1 [Source:HGNC Symbol;Acc:HGNC:24835]
ENSG00000169504	14316.6	-0.418789	0.072469	-5.77887	7.52042e-09	1.53688e-07	CLIC4	chloride intracellular channel 4 [Source:HGNC Symbol;Acc:HGNC:13518]	16067.2	13044.8	16247.3	10950.4	16952.7	12637.1	chloride intracellular channel 4 [Source:HGNC Symbol;Acc:HGNC:13518]
ENSG00000146411	388.153	-0.817144	0.141469	-5.77612	7.64429e-09	1.56014e-07	SLC2A12	solute carrier family 2 member 12 [Source:HGNC Symbol;Acc:HGNC:18067]	456.704	325.641	502.923	211.966	553.931	277.752	solute carrier family 2 member 12 [Source:HGNC Symbol;Acc:HGNC:18067]
ENSG00000138435	150.907	-0.960961	0.166402	-5.77496	7.69735e-09	1.5689e-07	CHRNA1	cholinergic receptor nicotinic alpha 1 subunit [Source:HGNC Symbol;Acc:HGNC:1955]	225.377	105.354	213.62	98.0056	176.527	86.5552	cholinergic receptor nicotinic alpha 1 subunit [Source:HGNC Symbol;Acc:HGNC:1955]
ENSG00000112473	3655.79	0.421602	0.0730729	5.76961	7.94562e-09	1.61738e-07	SLC39A7	solute carrier family 39 member 7 [Source:HGNC Symbol;Acc:HGNC:4927]	3229.66	3900.5	3138.99	4518.51	2971.75	4175.32	solute carrier family 39 member 7 [Source:HGNC Symbol;Acc:HGNC:4927]
ENSG00000120437	936.228	-0.664537	0.115226	-5.76723	8.05867e-09	1.63824e-07	ACAT2	acetyl-CoA acetyltransferase 2 [Source:HGNC Symbol;Acc:HGNC:94]	1122.42	811.707	1283.55	588.033	1070.12	741.533	acetyl-CoA acetyltransferase 2 [Source:HGNC Symbol;Acc:HGNC:94]
ENSG00000108679	25479.3	-0.371985	0.0646286	-5.75574	8.62641e-09	1.75137e-07	LGALS3BP	galectin 3 binding protein [Source:HGNC Symbol;Acc:HGNC:6564]	30855.8	21124.7	27911.6	22854.7	27627.1	22501.8	galectin 3 binding protein [Source:HGNC Symbol;Acc:HGNC:6564]
ENSG00000102317	1954.37	-0.408398	0.0709781	-5.75386	8.72277e-09	1.76861e-07	RBM3	RNA binding motif (RNP1, RRM) protein 3 [Source:HGNC Symbol;Acc:HGNC:9900]	2226.99	1774.26	2277.8	1600	2197.46	1649.72	RNA binding motif (RNP1, RRM) protein 3 [Source:HGNC Symbol;Acc:HGNC:9900]
ENSG00000197312	687.057	0.528153	0.091826	5.75167	8.83647e-09	1.78933e-07	DDI2	DNA damage inducible 1 homolog 2 [Source:HGNC Symbol;Acc:HGNC:24578]	528.855	808.115	561.515	790.882	586.801	846.174	DNA damage inducible 1 homolog 2 [Source:HGNC Symbol;Acc:HGNC:24578]
ENSG00000076067	6101.07	-0.431007	0.0749407	-5.75131	8.85547e-09	1.79084e-07	RBMS2	RNA binding motif single stranded interacting protein 2 [Source:HGNC Symbol;Acc:HGNC:9909]	7270.08	5413.77	6934.11	4626.77	6869.96	5491.74	RNA binding motif single stranded interacting protein 2 [Source:HGNC Symbol;Acc:HGNC:9909]
ENSG00000170017	6889.83	-0.503619	0.0876914	-5.74308	9.29685e-09	1.87765e-07	ALCAM	activated leukocyte cell adhesion molecule [Source:HGNC Symbol;Acc:HGNC:400]	7675.46	6474.5	8108.41	5034.75	8567.06	5478.82	activated leukocyte cell adhesion molecule [Source:HGNC Symbol;Acc:HGNC:400]
ENSG00000116962	7782.29	0.412057	0.0718223	5.73718	9.6267e-09	1.93922e-07	NID1	nidogen 1 [Source:HGNC Symbol;Acc:HGNC:7821]	7117.59	8410.39	6515.41	8741.87	6331.85	9576.63	nidogen 1 [Source:HGNC Symbol;Acc:HGNC:7821]
ENSG00000151702	461.287	-0.612741	0.106798	-5.73738	9.61517e-09	1.93922e-07	FLI1	Fli-1 proto-oncogene, ETS transcription factor [Source:HGNC Symbol;Acc:HGNC:3749]	557.12	337.613	580.436	353.276	547.844	391.436	Fli-1 proto-oncogene, ETS transcription factor [Source:HGNC Symbol;Acc:HGNC:3749]
ENSG00000198830	1118.8	0.440628	0.07681	5.7366	9.65965e-09	1.94081e-07	HMGN2	high mobility group nucleosomal binding domain 2 [Source:HGNC Symbol;Acc:HGNC:4986]	936.467	1318.13	974.718	1264.96	922.812	1295.74	high mobility group nucleosomal binding domain 2 [Source:HGNC Symbol;Acc:HGNC:4986]
ENSG00000148943	792.484	-0.563016	0.0981427	-5.73671	9.65353e-09	1.94081e-07	LIN7C	lin-7 homolog C, crumbs cell polarity complex component [Source:HGNC Symbol;Acc:HGNC:17789]	930.516	689.592	1000.35	562.962	920.377	651.102	lin-7 homolog C, crumbs cell polarity complex component [Source:HGNC Symbol;Acc:HGNC:17789]
ENSG00000188070	700.673	0.724581	0.126377	5.73351	9.83749e-09	1.97399e-07	C11orf95	chromosome 11 open reading frame 95 [Source:HGNC Symbol;Acc:HGNC:28449]	585.385	873.962	546.257	1001.71	415.144	781.581	chromosome 11 open reading frame 95 [Source:HGNC Symbol;Acc:HGNC:28449]
ENSG00000178188	929.71	0.55744	0.0972539	5.7318	9.93712e-09	1.9914e-07	SH2B1	SH2B adaptor protein 1 [Source:HGNC Symbol;Acc:HGNC:30417]	798.86	1075.09	778.798	1078.06	653.76	1193.69	SH2B adaptor protein 1 [Source:HGNC Symbol;Acc:HGNC:30417]
ENSG00000176485	402.183	-0.617467	0.107756	-5.73023	1.00294e-08	2.0073e-07	PLA2G16	phospholipase A2 group XVI [Source:HGNC Symbol;Acc:HGNC:17825]	499.846	317.26	476.678	309.971	496.712	312.632	phospholipase A2 group XVI [Source:HGNC Symbol;Acc:HGNC:17825]
ENSG00000177169	1134.85	0.496272	0.0866396	5.728	1.01619e-08	2.03121e-07	ULK1	unc-51 like autophagy activating kinase 1 [Source:HGNC Symbol;Acc:HGNC:12558]	996.716	1319.32	950.304	1277.49	855.853	1409.43	unc-51 like autophagy activating kinase 1 [Source:HGNC Symbol;Acc:HGNC:12558]
ENSG00000147408	900.641	0.707758	0.123611	5.72569	1.03014e-08	2.05644e-07	CSGALNACT1	chondroitin sulfate N-acetylgalactosaminyltransferase 1 [Source:HGNC Symbol;Acc:HGNC:24290]	727.454	879.948	651.846	1256.98	630.629	1256.99	chondroitin sulfate N-acetylgalactosaminyltransferase 1 [Source:HGNC Symbol;Acc:HGNC:24290]
ENSG00000136275	56.7154	-1.35448	0.236747	-5.72119	1.0578e-08	2.10893e-07	C7orf69	chromosome 7 open reading frame 69 [Source:HGNC Symbol;Acc:HGNC:21911]	98.9278	26.3386	77.5136	10.2564	94.9596	32.2967	chromosome 7 open reading frame 69 [Source:HGNC Symbol;Acc:HGNC:21911]
ENSG00000116863	1286.44	-0.430305	0.0752618	-5.71744	1.08138e-08	2.15219e-07	ADPRHL2	ADP-ribosylhydrolase like 2 [Source:HGNC Symbol;Acc:HGNC:21304]	1527.06	1052.35	1461.77	1107.69	1453.61	1116.17	ADP-ribosylhydrolase like 2 [Source:HGNC Symbol;Acc:HGNC:21304]
ENSG00000173457	627.712	0.736806	0.128873	5.7173	1.08227e-08	2.15219e-07	PPP1R14B	protein phosphatase 1 regulatory inhibitor subunit 14B [Source:HGNC Symbol;Acc:HGNC:9057]	496.87	711.141	460.809	981.195	421.231	695.026	protein phosphatase 1 regulatory inhibitor subunit 14B [Source:HGNC Symbol;Acc:HGNC:9057]
ENSG00000173193	14866.9	-0.504874	0.0883707	-5.71314	1.10912e-08	2.20026e-07	PARP14	poly(ADP-ribose) polymerase family member 14 [Source:HGNC Symbol;Acc:HGNC:29232]	18112	13802.6	18069.8	10549.3	16379.3	12288.3	poly(ADP-ribose) polymerase family member 14 [Source:HGNC Symbol;Acc:HGNC:29232]
ENSG00000100106	850.674	0.562617	0.0984781	5.71311	1.10928e-08	2.20026e-07	TRIOBP	TRIO and F-actin binding protein [Source:HGNC Symbol;Acc:HGNC:17009]	747.537	966.147	606.681	1059.83	689.065	1034.79	TRIO and F-actin binding protein [Source:HGNC Symbol;Acc:HGNC:17009]
ENSG00000175906	224.172	0.839518	0.147099	5.70718	1.14865e-08	2.27545e-07	ARL4D	ADP ribosylation factor like GTPase 4D [Source:HGNC Symbol;Acc:HGNC:656]	156.946	284.935	129.393	304.273	181.397	288.087	ADP ribosylation factor like GTPase 4D [Source:HGNC Symbol;Acc:HGNC:656]
ENSG00000135723	657.788	0.633626	0.11117	5.69962	1.20078e-08	2.37568e-07	FHOD1	formin homology 2 domain containing 1 [Source:HGNC Symbol;Acc:HGNC:17905]	493.151	729.1	562.126	909.401	467.493	785.456	formin homology 2 domain containing 1 [Source:HGNC Symbol;Acc:HGNC:17905]
ENSG00000153814	1306.99	-0.475568	0.0834472	-5.69903	1.2049e-08	2.3808e-07	JAZF1	JAZF zinc finger 1 [Source:HGNC Symbol;Acc:HGNC:28917]	1427.39	1118.19	1499	1046.15	1655.71	1095.51	JAZF zinc finger 1 [Source:HGNC Symbol;Acc:HGNC:28917]
ENSG00000169991	293.661	0.782426	0.137298	5.69876	1.20682e-08	2.38156e-07	IFFO2	intermediate filament family orphan 2 [Source:HGNC Symbol;Acc:HGNC:27006]	241.741	348.387	178.83	390.883	209.398	392.728	intermediate filament family orphan 2 [Source:HGNC Symbol;Acc:HGNC:27006]
ENSG00000084710	97.2282	1.04832	0.184018	5.69685	1.22039e-08	2.40527e-07	EFR3B	EFR3 homolog B [Source:HGNC Symbol;Acc:HGNC:29155]	52.8111	126.904	63.4757	144.729	57.2192	138.23	EFR3 homolog B [Source:HGNC Symbol;Acc:HGNC:29155]
ENSG00000167244	13099.3	-0.34962	0.0614296	-5.6914	1.26004e-08	2.48026e-07	IGF2	insulin like growth factor 2 [Source:HGNC Symbol;Acc:HGNC:5466]	15329.3	11735	14368.1	10858.1	14405.9	11899.4	insulin like growth factor 2 [Source:HGNC Symbol;Acc:HGNC:5466]
ENSG00000166889	3241.22	-0.452253	0.0795303	-5.68655	1.29628e-08	2.54837e-07	PATL1	PAT1 homolog 1, processing body mRNA decay factor [Source:HGNC Symbol;Acc:HGNC:26721]	3754.79	2969.08	3776.8	2413.67	3739.95	2793.02	PAT1 homolog 1, processing body mRNA decay factor [Source:HGNC Symbol;Acc:HGNC:26721]
ENSG00000138080	13331.4	0.542712	0.095453	5.68564	1.30321e-08	2.55552e-07	EMILIN1	elastin microfibril interfacer 1 [Source:HGNC Symbol;Acc:HGNC:19880]	12409.9	14349.7	10488.7	17159	9386.39	16194.9	elastin microfibril interfacer 1 [Source:HGNC Symbol;Acc:HGNC:19880]
ENSG00000106976	266.102	0.856895	0.150712	5.68564	1.30321e-08	2.55552e-07	DNM1	dynamin 1 [Source:HGNC Symbol;Acc:HGNC:2972]	214.963	396.276	176.999	300.854	150.961	356.556	dynamin 1 [Source:HGNC Symbol;Acc:HGNC:2972]
ENSG00000119630	184.883	0.924486	0.162803	5.67855	1.35838e-08	2.66034e-07	PGF	placental growth factor [Source:HGNC Symbol;Acc:HGNC:8893]	145.788	256.202	111.082	275.783	104.699	215.742	placental growth factor [Source:HGNC Symbol;Acc:HGNC:8893]
ENSG00000120549	1904.68	-0.407068	0.0717283	-5.67514	1.38574e-08	2.71049e-07	KIAA1217	KIAA1217 [Source:HGNC Symbol;Acc:HGNC:25428]	2294.68	1611.44	2091.65	1605.7	2143.89	1680.72	KIAA1217 [Source:HGNC Symbol;Acc:HGNC:25428]
ENSG00000128203	225.982	-0.784674	0.138298	-5.6738	1.39663e-08	2.72835e-07	ASPHD2	aspartate beta-hydroxylase domain containing 2 [Source:HGNC Symbol;Acc:HGNC:30437]	304.222	172.398	271.603	150.427	297.053	160.192	aspartate beta-hydroxylase domain containing 2 [Source:HGNC Symbol;Acc:HGNC:30437]
ENSG00000182551	1313.22	0.447221	0.0788446	5.67219	1.40984e-08	2.7507e-07	ADI1	acireductone dioxygenase 1 [Source:HGNC Symbol;Acc:HGNC:30576]	1026.47	1532.43	1133.41	1498.57	1161.43	1526.99	acireductone dioxygenase 1 [Source:HGNC Symbol;Acc:HGNC:30576]
ENSG00000111331	33866.5	-0.40852	0.072051	-5.66987	1.42905e-08	2.78466e-07	OAS3	2'-5'-oligoadenylate synthetase 3 [Source:HGNC Symbol;Acc:HGNC:8088]	40478.6	30618.6	38754.9	26176.6	36940.5	30229.7	2'-5'-oligoadenylate synthetase 3 [Source:HGNC Symbol;Acc:HGNC:8088]
ENSG00000148730	2505.45	0.378334	0.0667377	5.66898	1.43651e-08	2.79569e-07	EIF4EBP2	eukaryotic translation initiation factor 4E binding protein 2 [Source:HGNC Symbol;Acc:HGNC:3289]	2148.15	2924.78	2268.64	2766.95	2098.85	2825.32	eukaryotic translation initiation factor 4E binding protein 2 [Source:HGNC Symbol;Acc:HGNC:3289]
ENSG00000052723	952.221	-0.485132	0.0856061	-5.66703	1.45296e-08	2.82064e-07	SIKE1	suppressor of IKBKE 1 [Source:HGNC Symbol;Acc:HGNC:26119]	1043.58	809.313	1146.83	761.253	1156.56	795.791	suppressor of IKBKE 1 [Source:HGNC Symbol;Acc:HGNC:26119]
ENSG00000132792	1311.41	-0.473192	0.0834968	-5.66719	1.45162e-08	2.82064e-07	CTNNBL1	catenin beta like 1 [Source:HGNC Symbol;Acc:HGNC:15879]	1535.98	1103.83	1427.59	1030.2	1630.14	1140.72	catenin beta like 1 [Source:HGNC Symbol;Acc:HGNC:15879]
ENSG00000167508	1425.74	-0.565095	0.0997747	-5.66371	1.48132e-08	2.8721e-07	MVD	mevalonate diphosphate decarboxylase [Source:HGNC Symbol;Acc:HGNC:7529]	1727.89	1281.01	1862.16	1128.2	1544.92	1010.24	mevalonate diphosphate decarboxylase [Source:HGNC Symbol;Acc:HGNC:7529]
ENSG00000120885	5481.17	-0.338315	0.0597403	-5.6631	1.48659e-08	2.87872e-07	CLU	clusterin [Source:HGNC Symbol;Acc:HGNC:2095]	6424.36	4782.85	6011.88	4817.09	5950.8	4900.06	clusterin [Source:HGNC Symbol;Acc:HGNC:2095]
ENSG00000137507	153.188	0.921788	0.16289	5.65894	1.52309e-08	2.94571e-07	LRRC32	leucine rich repeat containing 32 [Source:HGNC Symbol;Acc:HGNC:4161]	107.854	189.159	84.8377	211.966	109.569	215.742	leucine rich repeat containing 32 [Source:HGNC Symbol;Acc:HGNC:4161]
ENSG00000164300	565.891	0.584232	0.103257	5.65806	1.53096e-08	2.95724e-07	SERINC5	serine incorporator 5 [Source:HGNC Symbol;Acc:HGNC:18825]	455.217	719.522	477.288	640.455	407.839	695.026	serine incorporator 5 [Source:HGNC Symbol;Acc:HGNC:18825]
ENSG00000170458	913.836	-0.830321	0.146758	-5.65777	1.53353e-08	2.95854e-07	CD14	CD14 molecule [Source:HGNC Symbol;Acc:HGNC:1628]	1019.03	581.843	968.614	610.825	1596.05	706.652	CD14 molecule [Source:HGNC Symbol;Acc:HGNC:1628]
ENSG00000168092	1819.05	0.384683	0.0680297	5.65463	1.56182e-08	3.00936e-07	PAFAH1B2	platelet activating factor acetylhydrolase 1b catalytic subunit 2 [Source:HGNC Symbol;Acc:HGNC:8575]	1518.13	2090.32	1591.16	2041.02	1613.09	2060.53	platelet activating factor acetylhydrolase 1b catalytic subunit 2 [Source:HGNC Symbol;Acc:HGNC:8575]
ENSG00000116017	1440.18	0.478757	0.0846767	5.65393	1.56816e-08	3.01783e-07	ARID3A	AT-rich interaction domain 3A [Source:HGNC Symbol;Acc:HGNC:3031]	1301.68	1623.41	1119.98	1789.17	1168.73	1638.09	AT-rich interaction domain 3A [Source:HGNC Symbol;Acc:HGNC:3031]
ENSG00000167106	588.062	0.580477	0.102712	5.65151	1.59043e-08	3.0569e-07	FAM102A	family with sequence similarity 102 member A [Source:HGNC Symbol;Acc:HGNC:31419]	503.565	675.225	462.64	763.532	430.97	692.442	family with sequence similarity 102 member A [Source:HGNC Symbol;Acc:HGNC:31419]
ENSG00000130956	351.78	0.746481	0.13212	5.65004	1.60408e-08	3.07931e-07	HABP4	hyaluronan binding protein 4 [Source:HGNC Symbol;Acc:HGNC:17062]	276.7	441.77	280.147	486.609	208.181	417.274	hyaluronan binding protein 4 [Source:HGNC Symbol;Acc:HGNC:17062]
ENSG00000156642	3094.27	-0.390651	0.0691465	-5.64961	1.60808e-08	3.08319e-07	NPTN	neuroplastin [Source:HGNC Symbol;Acc:HGNC:17867]	3452.8	2530.9	3389.23	2729.34	3716.81	2746.51	neuroplastin [Source:HGNC Symbol;Acc:HGNC:17867]
ENSG00000134779	1689.22	-0.437319	0.0774169	-5.64889	1.61485e-08	3.09235e-07	TPGS2	tubulin polyglutamylase complex subunit 2 [Source:HGNC Symbol;Acc:HGNC:24561]	1957.73	1428.27	1809.67	1408.55	2084.24	1446.89	tubulin polyglutamylase complex subunit 2 [Source:HGNC Symbol;Acc:HGNC:24561]
ENSG00000136048	4522.39	-0.464917	0.0823165	-5.64792	1.62403e-08	3.10609e-07	DRAM1	DNA damage regulated autophagy modulator 1 [Source:HGNC Symbol;Acc:HGNC:25645]	5095.9	3984.31	4857.11	3499.71	5843.66	3853.65	DNA damage regulated autophagy modulator 1 [Source:HGNC Symbol;Acc:HGNC:25645]
ENSG00000006062	527.744	-0.702131	0.124322	-5.64766	1.62649e-08	3.10696e-07	MAP3K14	mitogen-activated protein kinase kinase kinase 14 [Source:HGNC Symbol;Acc:HGNC:6853]	773.571	425.009	619.498	350.997	590.454	406.939	mitogen-activated protein kinase kinase kinase 14 [Source:HGNC Symbol;Acc:HGNC:6853]
ENSG00000070814	913.037	0.472535	0.0836773	5.64711	1.63169e-08	3.11305e-07	TCOF1	treacle ribosome biogenesis factor 1 [Source:HGNC Symbol;Acc:HGNC:11654]	792.91	1057.13	730.58	1103.13	759.676	1034.79	treacle ribosome biogenesis factor 1 [Source:HGNC Symbol;Acc:HGNC:11654]
ENSG00000172830	580.851	0.538604	0.0954304	5.64395	1.66192e-08	3.16684e-07	SSH3	slingshot protein phosphatase 3 [Source:HGNC Symbol;Acc:HGNC:30581]	494.639	701.564	462.03	700.854	451.667	674.356	slingshot protein phosphatase 3 [Source:HGNC Symbol;Acc:HGNC:30581]
ENSG00000189007	288.852	0.683917	0.12119	5.64336	1.6676e-08	3.17111e-07	ADAT2	adenosine deaminase, tRNA specific 2 [Source:HGNC Symbol;Acc:HGNC:21172]	217.939	342.401	217.892	363.532	216.703	374.642	adenosine deaminase, tRNA specific 2 [Source:HGNC Symbol;Acc:HGNC:21172]
ENSG00000105894	7521.8	-0.471998	0.0836387	-5.6433	1.66825e-08	3.17111e-07	PTN	pleiotrophin [Source:HGNC Symbol;Acc:HGNC:9630]	8083.07	6593.02	8447.76	5726.49	9797.88	6482.6	pleiotrophin [Source:HGNC Symbol;Acc:HGNC:9630]
ENSG00000183287	3818.93	-0.362287	0.0643661	-5.62853	1.81754e-08	3.45065e-07	CCBE1	collagen and calcium binding EGF domains 1 [Source:HGNC Symbol;Acc:HGNC:29426]	4195.88	3524.58	4393.25	3263.81	4321.88	3214.17	collagen and calcium binding EGF domains 1 [Source:HGNC Symbol;Acc:HGNC:29426]
ENSG00000103042	1234.46	0.43836	0.077924	5.62548	1.8499e-08	3.50781e-07	SLC38A7	solute carrier family 38 member 7 [Source:HGNC Symbol;Acc:HGNC:25582]	1063.66	1362.42	1057.11	1499.71	1009.25	1414.6	solute carrier family 38 member 7 [Source:HGNC Symbol;Acc:HGNC:25582]
ENSG00000116194	367.129	-0.782968	0.139188	-5.62526	1.85229e-08	3.50803e-07	ANGPTL1	angiopoietin like 1 [Source:HGNC Symbol;Acc:HGNC:489]	453.729	281.344	408.93	223.362	556.366	279.044	angiopoietin like 1 [Source:HGNC Symbol;Acc:HGNC:489]
ENSG00000104679	389.01	0.63068	0.112157	5.6232	1.87453e-08	3.54583e-07	R3HCC1	R3H domain and coiled-coil containing 1 [Source:HGNC Symbol;Acc:HGNC:27329]	313.891	445.361	284.42	490.028	305.575	494.786	R3H domain and coiled-coil containing 1 [Source:HGNC Symbol;Acc:HGNC:27329]
ENSG00000160953	575.309	0.541626	0.0965156	5.6118	2.00236e-08	3.78302e-07	MUM1	melanoma associated antigen (mutated) 1 [Source:HGNC Symbol;Acc:HGNC:29641]	448.522	675.225	466.302	658.689	479.667	723.447	melanoma associated antigen (mutated) 1 [Source:HGNC Symbol;Acc:HGNC:29641]
ENSG00000165300	424.676	0.811851	0.144781	5.60745	2.05328e-08	3.8745e-07	SLITRK5	SLIT and NTRK like family member 5 [Source:HGNC Symbol;Acc:HGNC:20295]	332.487	583.04	328.364	615.384	228.877	459.905	SLIT and NTRK like family member 5 [Source:HGNC Symbol;Acc:HGNC:20295]
ENSG00000172346	447.088	0.626018	0.111657	5.6066	2.06335e-08	3.88878e-07	CSDC2	cold shock domain containing C2 [Source:HGNC Symbol;Acc:HGNC:30359]	357.776	539.941	375.361	557.264	303.14	549.044	cold shock domain containing C2 [Source:HGNC Symbol;Acc:HGNC:30359]
ENSG00000122786	13550.5	-0.411418	0.0735143	-5.59644	2.188e-08	4.11607e-07	CALD1	caldesmon 1 [Source:HGNC Symbol;Acc:HGNC:1441]	15458.8	12616.2	15414.8	10363.5	15656.2	11793.5	caldesmon 1 [Source:HGNC Symbol;Acc:HGNC:1441]
ENSG00000155254	3040.48	0.45866	0.0819593	5.59619	2.19111e-08	4.11607e-07	MARVELD1	MARVEL domain containing 1 [Source:HGNC Symbol;Acc:HGNC:28674]	2660.64	3306.69	2605.55	3917.94	2376.42	3375.65	MARVEL domain containing 1 [Source:HGNC Symbol;Acc:HGNC:28674]
ENSG00000092295	184.922	-0.892847	0.159553	-5.59592	2.19456e-08	4.11607e-07	TGM1	transglutaminase 1 [Source:HGNC Symbol;Acc:HGNC:11777]	249.179	129.298	207.517	118.518	284.879	120.144	transglutaminase 1 [Source:HGNC Symbol;Acc:HGNC:11777]
ENSG00000198888	17180.7	0.439652	0.0785663	5.59594	2.19435e-08	4.11607e-07	MT-ND1	mitochondrially encoded NADH:ubiquinone oxidoreductase core subunit 1 [Source:HGNC Symbol;Acc:HGNC:7455]	14885.3	19174.5	12906.9	21071.2	15775.5	19270.8	mitochondrially encoded NADH:ubiquinone oxidoreductase core subunit 1 [Source:HGNC Symbol;Acc:HGNC:7455]
ENSG00000102547	1005.84	-0.614079	0.109848	-5.59026	2.26733e-08	4.2474e-07	CAB39L	calcium binding protein 39 like [Source:HGNC Symbol;Acc:HGNC:20290]	1141.76	810.51	1110.82	703.133	1431.7	837.131	calcium binding protein 39 like [Source:HGNC Symbol;Acc:HGNC:20290]
ENSG00000150347	11079.8	-0.4782	0.0855614	-5.58897	2.28419e-08	4.27382e-07	ARID5B	AT-rich interaction domain 5B [Source:HGNC Symbol;Acc:HGNC:17362]	13536.7	10031.4	13733.9	8256.4	11580.2	9340.21	AT-rich interaction domain 5B [Source:HGNC Symbol;Acc:HGNC:17362]
ENSG00000179750	174.778	-0.911846	0.163169	-5.58837	2.29216e-08	4.28358e-07	APOBEC3B	apolipoprotein B mRNA editing enzyme catalytic subunit 3B [Source:HGNC Symbol;Acc:HGNC:17352]	208.269	125.707	222.775	99.1452	273.922	118.852	apolipoprotein B mRNA editing enzyme catalytic subunit 3B [Source:HGNC Symbol;Acc:HGNC:17352]
ENSG00000131094	1181.35	0.663048	0.118672	5.58726	2.30686e-08	4.30587e-07	C1QL1	complement C1q like 1 [Source:HGNC Symbol;Acc:HGNC:24182]	992.997	1342.07	958.849	1710.54	741.415	1342.25	complement C1q like 1 [Source:HGNC Symbol;Acc:HGNC:24182]
ENSG00000167110	2097.44	0.508342	0.0910536	5.58288	2.36562e-08	4.40495e-07	GOLGA2	golgin A2 [Source:HGNC Symbol;Acc:HGNC:4425]	1850.62	2400.4	1831.64	2441.02	1469.44	2591.49	golgin A2 [Source:HGNC Symbol;Acc:HGNC:4425]
ENSG00000259884	23.241	1.42443	0.255138	5.583	2.36401e-08	4.40495e-07	RP11-1100L3.8		3.71909	38.3107	0	60.3988	7.30458	29.713
ENSG00000143033	820.571	-0.570185	0.102239	-5.57696	2.44752e-08	4.54653e-07	MTF2	metal response element binding transcription factor 2 [Source:HGNC Symbol;Acc:HGNC:29535]	975.145	745.86	940.538	594.871	1048.21	618.805	metal response element binding transcription factor 2 [Source:HGNC Symbol;Acc:HGNC:29535]
ENSG00000140945	497.743	-0.559488	0.10032	-5.57702	2.44676e-08	4.54653e-07	CDH13	cadherin 13 [Source:HGNC Symbol;Acc:HGNC:1753]	601.005	381.909	584.098	411.395	606.28	401.771	cadherin 13 [Source:HGNC Symbol;Acc:HGNC:1753]
ENSG00000166130	1892.02	0.399701	0.0717409	5.57145	2.52623e-08	4.68712e-07	IKBIP	IKBKB interacting protein [Source:HGNC Symbol;Acc:HGNC:26430]	1545.65	2174.13	1644.26	2221.08	1692.23	2074.74	IKBKB interacting protein [Source:HGNC Symbol;Acc:HGNC:26430]
ENSG00000109743	423.904	-0.638781	0.114803	-5.56413	2.63467e-08	4.88249e-07	BST1	bone marrow stromal cell antigen 1 [Source:HGNC Symbol;Acc:HGNC:1118]	484.225	342.401	503.533	323.646	578.279	311.34	bone marrow stromal cell antigen 1 [Source:HGNC Symbol;Acc:HGNC:1118]
ENSG00000115520	1247.99	-0.423679	0.0761579	-5.56317	2.64923e-08	4.90154e-07	COQ10B	coenzyme Q10B [Source:HGNC Symbol;Acc:HGNC:25819]	1400.61	1028.4	1448.95	1109.97	1453.61	1046.41	coenzyme Q10B [Source:HGNC Symbol;Acc:HGNC:25819]
ENSG00000108840	758.463	0.661445	0.1189	5.56303	2.65127e-08	4.90154e-07	HDAC5	histone deacetylase 5 [Source:HGNC Symbol;Acc:HGNC:14068]	627.039	823.679	612.784	1078.06	489.407	919.811	histone deacetylase 5 [Source:HGNC Symbol;Acc:HGNC:14068]
ENSG00000134851	2960.71	-0.333282	0.0599195	-5.56216	2.66457e-08	4.92026e-07	TMEM165	transmembrane protein 165 [Source:HGNC Symbol;Acc:HGNC:30760]	3286.19	2590.76	3276.32	2616.52	3356.45	2638	transmembrane protein 165 [Source:HGNC Symbol;Acc:HGNC:30760]
ENSG00000128567	887.958	0.507304	0.0913065	5.55606	2.75933e-08	5.08917e-07	PODXL	podocalyxin like [Source:HGNC Symbol;Acc:HGNC:9171]	731.173	985.302	673.819	1083.76	784.025	1069.67	podocalyxin like [Source:HGNC Symbol;Acc:HGNC:9171]
ENSG00000170542	182.035	-0.920564	0.165706	-5.55541	2.76957e-08	5.10082e-07	SERPINB9	serpin family B member 9 [Source:HGNC Symbol;Acc:HGNC:8955]	232.815	101.763	222.165	108.262	281.226	145.981	serpin family B member 9 [Source:HGNC Symbol;Acc:HGNC:8955]
ENSG00000140545	5199.48	-0.412614	0.0742747	-5.55525	2.77222e-08	5.10082e-07	MFGE8	milk fat globule-EGF factor 8 protein [Source:HGNC Symbol;Acc:HGNC:7036]	6482.37	4590.09	5898.96	4498	5477.22	4250.25	milk fat globule-EGF factor 8 protein [Source:HGNC Symbol;Acc:HGNC:7036]
ENSG00000087299	232.909	-0.890709	0.160377	-5.55384	2.79461e-08	5.13593e-07	L2HGDH	L-2-hydroxyglutarate dehydrogenase [Source:HGNC Symbol;Acc:HGNC:20499]	294.552	202.328	330.196	125.356	306.792	138.23	L-2-hydroxyglutarate dehydrogenase [Source:HGNC Symbol;Acc:HGNC:20499]
ENSG00000108094	1283.05	-0.49009	0.0882505	-5.5534	2.80173e-08	5.14292e-07	CUL2	cullin 2 [Source:HGNC Symbol;Acc:HGNC:2552]	1422.18	1163.69	1501.44	980.056	1594.83	1036.08	cullin 2 [Source:HGNC Symbol;Acc:HGNC:2552]
ENSG00000198876	677.198	-0.513355	0.0924598	-5.55219	2.82107e-08	5.17229e-07	DCAF12	DDB1 and CUL4 associated factor 12 [Source:HGNC Symbol;Acc:HGNC:19911]	785.472	589.026	819.691	547.008	796.199	525.791	DDB1 and CUL4 associated factor 12 [Source:HGNC Symbol;Acc:HGNC:19911]
ENSG00000011566	3848.38	-0.354222	0.0638386	-5.54871	2.87784e-08	5.27016e-07	MAP4K3	mitogen-activated protein kinase kinase kinase kinase 3 [Source:HGNC Symbol;Acc:HGNC:6865]	4172.07	3483.87	4372.5	3214.81	4433.88	3413.12	mitogen-activated protein kinase kinase kinase kinase 3 [Source:HGNC Symbol;Acc:HGNC:6865]
ENSG00000072133	236.767	0.752242	0.135654	5.54528	2.93483e-08	5.36817e-07	RPS6KA6	ribosomal protein S6 kinase A6 [Source:HGNC Symbol;Acc:HGNC:10435]	152.483	302.894	186.155	305.413	176.527	297.13	ribosomal protein S6 kinase A6 [Source:HGNC Symbol;Acc:HGNC:10435]
ENSG00000156675	652.089	-0.584192	0.105363	-5.54458	2.94669e-08	5.38352e-07	RAB11FIP1	RAB11 family interacting protein 1 [Source:HGNC Symbol;Acc:HGNC:30265]	730.429	523.18	754.994	478.632	881.419	543.877	RAB11 family interacting protein 1 [Source:HGNC Symbol;Acc:HGNC:30265]
ENSG00000182752	4642.32	0.467324	0.0842981	5.5437	2.96144e-08	5.40312e-07	PAPPA	pappalysin 1 [Source:HGNC Symbol;Acc:HGNC:8602]	4239.02	5192.29	3798.16	5055.26	3586.55	5982.65	pappalysin 1 [Source:HGNC Symbol;Acc:HGNC:8602]
ENSG00000136051	4096.26	-0.471915	0.0851313	-5.54338	2.96695e-08	5.40312e-07	KIAA1033	KIAA1033 [Source:HGNC Symbol;Acc:HGNC:29174]	4570.76	3857.4	4844.29	3035.89	4923.29	3345.94	KIAA1033 [Source:HGNC Symbol;Acc:HGNC:29174]
ENSG00000184988	491.491	-0.605489	0.109229	-5.54332	2.96787e-08	5.40312e-07	TMEM106A	transmembrane protein 106A [Source:HGNC Symbol;Acc:HGNC:28288]	655.304	397.473	548.698	377.208	590.454	379.81	transmembrane protein 106A [Source:HGNC Symbol;Acc:HGNC:28288]
ENSG00000126803	2825.12	0.445459	0.0803646	5.54298	2.97366e-08	5.40732e-07	HSPA2	heat shock protein family A (Hsp70) member 2 [Source:HGNC Symbol;Acc:HGNC:5235]	2492.53	3124.71	2446.25	3108.83	2199.9	3578.48	heat shock protein family A (Hsp70) member 2 [Source:HGNC Symbol;Acc:HGNC:5235]
ENSG00000197121	602.702	-0.727107	0.131246	-5.54003	3.02416e-08	5.48629e-07	PGAP1	post-GPI attachment to proteins 1 [Source:HGNC Symbol;Acc:HGNC:25712]	734.892	529.166	703.115	350.997	849.766	448.279	post-GPI attachment to proteins 1 [Source:HGNC Symbol;Acc:HGNC:25712]
ENSG00000093010	4309.28	-0.395355	0.071362	-5.54014	3.0223e-08	5.48629e-07	COMT	catechol-O-methyltransferase [Source:HGNC Symbol;Acc:HGNC:2228]	4982.84	3414.44	4685.6	3921.36	5057.2	3794.22	catechol-O-methyltransferase [Source:HGNC Symbol;Acc:HGNC:2228]
ENSG00000167600	511.634	0.702751	0.127021	5.53256	3.15592e-08	5.71863e-07	CYP2S1	cytochrome P450 family 2 subfamily S member 1 [Source:HGNC Symbol;Acc:HGNC:15654]	412.819	517.194	372.92	709.971	356.707	700.193	cytochrome P450 family 2 subfamily S member 1 [Source:HGNC Symbol;Acc:HGNC:15654]
ENSG00000008513	1778.97	0.473535	0.0856364	5.5296	3.20969e-08	5.80929e-07	ST3GAL1	ST3 beta-galactoside alpha-2,3-sialyltransferase 1 [Source:HGNC Symbol;Acc:HGNC:10862]	1608.13	1915.53	1441.02	2077.49	1391.52	2240.1	ST3 beta-galactoside alpha-2,3-sialyltransferase 1 [Source:HGNC Symbol;Acc:HGNC:10862]
ENSG00000174332	35.4547	1.34939	0.244053	5.5291	3.21871e-08	5.81881e-07	GLIS1	GLIS family zinc finger 1 [Source:HGNC Symbol;Acc:HGNC:29525]	12.6449	43.0995	15.2586	64.9572	12.1743	64.5935	GLIS family zinc finger 1 [Source:HGNC Symbol;Acc:HGNC:29525]
ENSG00000025293	1226.77	0.403742	0.0731388	5.52022	3.38574e-08	6.11365e-07	PHF20	PHD finger protein 20 [Source:HGNC Symbol;Acc:HGNC:16098]	1043.58	1403.13	1046.74	1410.82	1068.9	1387.47	PHD finger protein 20 [Source:HGNC Symbol;Acc:HGNC:16098]
ENSG00000130402	10985.8	-0.298921	0.0541651	-5.51869	3.41533e-08	6.15991e-07	ACTN4	actinin alpha 4 [Source:HGNC Symbol;Acc:HGNC:166]	12492.4	9898.51	12129.3	9941.87	11773.8	9678.68	actinin alpha 4 [Source:HGNC Symbol;Acc:HGNC:166]
ENSG00000185753	685.03	-0.514958	0.093325	-5.5179	3.43068e-08	6.1804e-07	CXorf38	chromosome X open reading frame 38 [Source:HGNC Symbol;Acc:HGNC:28589]	764.645	572.265	854.48	544.729	810.808	563.255	chromosome X open reading frame 38 [Source:HGNC Symbol;Acc:HGNC:28589]
ENSG00000186063	544.177	-0.595796	0.107988	-5.51726	3.4432e-08	6.19576e-07	AIDA	axin interactor, dorsalization associated [Source:HGNC Symbol;Acc:HGNC:25761]	659.767	480.08	664.053	376.068	656.195	428.901	axin interactor, dorsalization associated [Source:HGNC Symbol;Acc:HGNC:25761]
ENSG00000151388	1219.59	0.505485	0.0917938	5.50675	3.65524e-08	6.56208e-07	ADAMTS12	ADAM metallopeptidase with thrombospondin type 1 motif 12 [Source:HGNC Symbol;Acc:HGNC:14605]	1088.21	1315.73	921.007	1521.37	994.64	1476.61	ADAM metallopeptidase with thrombospondin type 1 motif 12 [Source:HGNC Symbol;Acc:HGNC:14605]
ENSG00000205659	751.771	-0.494443	0.089787	-5.50685	3.65308e-08	6.56208e-07	LIN52	lin-52 DREAM MuvB core complex component [Source:HGNC Symbol;Acc:HGNC:19856]	861.341	626.14	864.856	642.734	926.464	589.092	lin-52 DREAM MuvB core complex component [Source:HGNC Symbol;Acc:HGNC:19856]
ENSG00000140743	831.697	0.527591	0.0958299	5.5055	3.68132e-08	6.60126e-07	CDR2	cerebellar degeneration related protein 2 [Source:HGNC Symbol;Acc:HGNC:1799]	705.883	936.217	605.46	1005.13	719.501	1017.99	cerebellar degeneration related protein 2 [Source:HGNC Symbol;Acc:HGNC:1799]
ENSG00000138448	2678.7	0.391016	0.0710262	5.50524	3.68659e-08	6.60309e-07	ITGAV	integrin subunit alpha V [Source:HGNC Symbol;Acc:HGNC:6150]	2383.94	3233.66	2307.1	2854.7	2238.85	3053.98	integrin subunit alpha V [Source:HGNC Symbol;Acc:HGNC:6150]
ENSG00000136379	1488.59	0.624019	0.113361	5.50469	3.69828e-08	6.61638e-07	ABHD17C	abhydrolase domain containing 17C [Source:HGNC Symbol;Acc:HGNC:26925]	1202.75	1449.82	1133.41	2132.19	1128.56	1884.84	abhydrolase domain containing 17C [Source:HGNC Symbol;Acc:HGNC:26925]
ENSG00000169139	682.243	-0.557525	0.101294	-5.50405	3.71168e-08	6.6327e-07	UBE2V2	ubiquitin conjugating enzyme E2 V2 [Source:HGNC Symbol;Acc:HGNC:12495]	731.173	551.913	830.677	534.472	893.594	551.628	ubiquitin conjugating enzyme E2 V2 [Source:HGNC Symbol;Acc:HGNC:12495]
ENSG00000100342	6220.86	-0.42856	0.0778788	-5.50291	3.73579e-08	6.66811e-07	APOL1	apolipoprotein L1 [Source:HGNC Symbol;Acc:HGNC:618]	7749.84	5671.17	6983.54	4844.44	6743.35	5332.84	apolipoprotein L1 [Source:HGNC Symbol;Acc:HGNC:618]
ENSG00000180628	3570.68	-0.559496	0.10168	-5.5025	3.74444e-08	6.67587e-07	PCGF5	polycomb group ring finger 5 [Source:HGNC Symbol;Acc:HGNC:28264]	4014.39	3401.27	4420.1	2436.46	4414.4	2737.47	polycomb group ring finger 5 [Source:HGNC Symbol;Acc:HGNC:28264]
ENSG00000182667	456.943	-0.570304	0.103673	-5.50098	3.7769e-08	6.72601e-07	NTM	neurotrimin [Source:HGNC Symbol;Acc:HGNC:17941]	562.326	367.543	562.736	361.253	523.495	364.307	neurotrimin [Source:HGNC Symbol;Acc:HGNC:17941]
ENSG00000110880	5819.36	-0.313141	0.0569331	-5.50016	3.79448e-08	6.74957e-07	CORO1C	coronin 1C [Source:HGNC Symbol;Acc:HGNC:2254]	6277.82	5280.88	6621.61	5182.9	6469.42	5083.5	coronin 1C [Source:HGNC Symbol;Acc:HGNC:2254]
ENSG00000069849	3481.94	0.415082	0.0755265	5.49585	3.88841e-08	6.90873e-07	ATP1B3	ATPase Na+/K+ transporting subunit beta 3 [Source:HGNC Symbol;Acc:HGNC:806]	3019.16	3882.55	2966.27	4398.85	2935.22	3689.58	ATPase Na+/K+ transporting subunit beta 3 [Source:HGNC Symbol;Acc:HGNC:806]
ENSG00000112902	4006.4	0.387849	0.0706021	5.49345	3.94157e-08	6.99516e-07	SEMA5A	semaphorin 5A [Source:HGNC Symbol;Acc:HGNC:10736]	3427.51	4835.52	3659.01	4324.78	3290.71	4500.87	semaphorin 5A [Source:HGNC Symbol;Acc:HGNC:10736]
ENSG00000148429	723.461	-0.495073	0.0901919	-5.48911	4.03965e-08	7.16103e-07	USP6NL	USP6 N-terminal like [Source:HGNC Symbol;Acc:HGNC:16858]	835.308	618.956	831.897	567.521	885.072	602.011	USP6 N-terminal like [Source:HGNC Symbol;Acc:HGNC:16858]
ENSG00000163017	1886.93	0.475472	0.0866776	5.48553	4.12234e-08	7.29926e-07	ACTG2	actin, gamma 2, smooth muscle, enteric [Source:HGNC Symbol;Acc:HGNC:145]	1552.35	1975.39	1533.79	2459.26	1625.27	2175.51	actin, gamma 2, smooth muscle, enteric [Source:HGNC Symbol;Acc:HGNC:145]
ENSG00000149428	2521.33	0.450626	0.0821638	5.48448	4.14676e-08	7.33415e-07	HYOU1	hypoxia up-regulated 1 [Source:HGNC Symbol;Acc:HGNC:16931]	2179.39	2627.87	2118.5	3231.9	2062.33	2908	hypoxia up-regulated 1 [Source:HGNC Symbol;Acc:HGNC:16931]
ENSG00000139679	176.526	-0.855276	0.156005	-5.48236	4.19692e-08	7.4144e-07	LPAR6	lysophosphatidic acid receptor 6 [Source:HGNC Symbol;Acc:HGNC:15520]	235.046	138.876	220.334	102.564	243.486	118.852	lysophosphatidic acid receptor 6 [Source:HGNC Symbol;Acc:HGNC:15520]
ENSG00000163683	2121.06	-0.543412	0.0991425	-5.48112	4.22645e-08	7.45808e-07	SMIM14	small integral membrane protein 14 [Source:HGNC Symbol;Acc:HGNC:27321]	2459.06	1923.91	2469.45	1421.08	2666.17	1786.65	small integral membrane protein 14 [Source:HGNC Symbol;Acc:HGNC:27321]
ENSG00000134013	19698.9	-0.39318	0.0717534	-5.4796	4.2629e-08	7.51385e-07	LOXL2	lysyl oxidase like 2 [Source:HGNC Symbol;Acc:HGNC:6666]	24305	16404.1	22092.6	18075.2	20860.7	16455.8	lysyl oxidase like 2 [Source:HGNC Symbol;Acc:HGNC:6666]
ENSG00000124767	1415.79	-0.407279	0.07438	-5.47565	4.35914e-08	7.67476e-07	GLO1	glyoxalase I [Source:HGNC Symbol;Acc:HGNC:4323]	1539.7	1221.15	1665.63	1196.58	1650.84	1220.82	glyoxalase I [Source:HGNC Symbol;Acc:HGNC:4323]
ENSG00000184979	1890.41	-0.412421	0.075337	-5.47434	4.39133e-08	7.72267e-07	USP18	ubiquitin specific peptidase 18 [Source:HGNC Symbol;Acc:HGNC:12616]	2249.31	1715.6	2075.78	1521.37	2169.46	1610.96	ubiquitin specific peptidase 18 [Source:HGNC Symbol;Acc:HGNC:12616]
ENSG00000143322	4539.59	-0.609636	0.11139	-5.473	4.42489e-08	7.77287e-07	ABL2	ABL proto-oncogene 2, non-receptor tyrosine kinase [Source:HGNC Symbol;Acc:HGNC:77]	6296.42	3895.71	5947.79	3382.33	4348.66	3366.61	ABL proto-oncogene 2, non-receptor tyrosine kinase [Source:HGNC Symbol;Acc:HGNC:77]
ENSG00000131797	224.387	-0.824667	0.150699	-5.47226	4.44323e-08	7.79103e-07	CLUHP3	clustered mitochondria homolog pseudogene 3 [Source:HGNC Symbol;Acc:HGNC:28447]	340.669	149.651	280.147	145.869	256.878	173.11	clustered mitochondria homolog pseudogene 3 [Source:HGNC Symbol;Acc:HGNC:28447]
ENSG00000185339	627.983	-0.508348	0.0928968	-5.47218	4.44527e-08	7.79103e-07	TCN2	transcobalamin 2 [Source:HGNC Symbol;Acc:HGNC:11653]	719.272	519.588	730.58	513.959	775.503	508.996	transcobalamin 2 [Source:HGNC Symbol;Acc:HGNC:11653]
ENSG00000138496	5763.21	-0.340905	0.0623079	-5.4713	4.46734e-08	7.82087e-07	PARP9	poly(ADP-ribose) polymerase family member 9 [Source:HGNC Symbol;Acc:HGNC:24118]	6468.24	5329.97	6486.11	4773.78	6397.6	5123.55	poly(ADP-ribose) polymerase family member 9 [Source:HGNC Symbol;Acc:HGNC:24118]
ENSG00000121060	8456.67	-0.429083	0.0784476	-5.46968	4.50842e-08	7.8839e-07	TRIM25	tripartite motif containing 25 [Source:HGNC Symbol;Acc:HGNC:12932]	10296.7	7642.97	10056.6	6574.35	8847.07	7322.31	tripartite motif containing 25 [Source:HGNC Symbol;Acc:HGNC:12932]
ENSG00000100523	773.518	0.532593	0.0974098	5.46755	4.5631e-08	7.97052e-07	DDHD1	DDHD domain containing 1 [Source:HGNC Symbol;Acc:HGNC:19714]	637.452	988.894	651.236	827.349	589.236	946.94	DDHD domain containing 1 [Source:HGNC Symbol;Acc:HGNC:19714]
ENSG00000221955	282.06	-0.7342	0.134293	-5.46714	4.57343e-08	7.97959e-07	SLC12A8	solute carrier family 12 member 8 [Source:HGNC Symbol;Acc:HGNC:15595]	330.999	234.653	365.595	202.849	377.403	180.862	solute carrier family 12 member 8 [Source:HGNC Symbol;Acc:HGNC:15595]
ENSG00000129219	503.711	0.585008	0.107008	5.46694	4.57865e-08	7.97972e-07	PLD2	phospholipase D2 [Source:HGNC Symbol;Acc:HGNC:9068]	435.133	579.449	369.257	640.455	390.795	607.178	phospholipase D2 [Source:HGNC Symbol;Acc:HGNC:9068]
ENSG00000180875	89.4646	1.06477	0.194877	5.46378	4.66108e-08	8.10516e-07	GREM2	gremlin 2, DAN family BMP antagonist [Source:HGNC Symbol;Acc:HGNC:17655]	53.5549	102.96	51.8791	129.914	49.9146	148.565	gremlin 2, DAN family BMP antagonist [Source:HGNC Symbol;Acc:HGNC:17655]
ENSG00000139180	344.556	-0.667981	0.122253	-5.4639	4.65782e-08	8.10516e-07	NDUFA9	NADH:ubiquinone oxidoreductase subunit A9 [Source:HGNC Symbol;Acc:HGNC:7693]	405.381	266.977	424.188	232.478	454.101	284.211	NADH:ubiquinone oxidoreductase subunit A9 [Source:HGNC Symbol;Acc:HGNC:7693]
ENSG00000138675	1879.68	-0.648742	0.11878	-5.46172	4.71544e-08	8.1905e-07	FGF5	fibroblast growth factor 5 [Source:HGNC Symbol;Acc:HGNC:3683]	2313.27	1559.96	2776.45	1479.2	1865.1	1284.12	fibroblast growth factor 5 [Source:HGNC Symbol;Acc:HGNC:3683]
ENSG00000163877	734.164	-0.509559	0.0933127	-5.46077	4.74072e-08	8.2252e-07	SNIP1	Smad nuclear interacting protein 1 [Source:HGNC Symbol;Acc:HGNC:30587]	882.168	656.07	859.973	560.683	858.288	587.8	Smad nuclear interacting protein 1 [Source:HGNC Symbol;Acc:HGNC:30587]
ENSG00000001629	4248.61	-0.436091	0.0798748	-5.45969	4.76975e-08	8.26632e-07	ANKIB1	ankyrin repeat and IBR domain containing 1 [Source:HGNC Symbol;Acc:HGNC:22215]	4838.54	3942.41	4871.76	3174.92	4995.12	3668.91	ankyrin repeat and IBR domain containing 1 [Source:HGNC Symbol;Acc:HGNC:22215]
ENSG00000183741	2143.08	0.466236	0.0855578	5.44937	5.05493e-08	8.75079e-07	CBX6	chromobox 6 [Source:HGNC Symbol;Acc:HGNC:1556]	1881.86	2380.05	1903.66	2634.75	1577.79	2480.39	chromobox 6 [Source:HGNC Symbol;Acc:HGNC:1556]
ENSG00000011198	846.583	0.476628	0.0874883	5.44791	5.09655e-08	8.813e-07	ABHD5	abhydrolase domain containing 5 [Source:HGNC Symbol;Acc:HGNC:21396]	717.04	936.217	698.232	970.939	695.153	1061.92	abhydrolase domain containing 5 [Source:HGNC Symbol;Acc:HGNC:21396]
ENSG00000108064	519.814	-0.573824	0.105359	-5.44638	5.14045e-08	8.87901e-07	TFAM	transcription factor A, mitochondrial [Source:HGNC Symbol;Acc:HGNC:11741]	595.798	450.15	653.677	382.906	629.411	406.939	transcription factor A, mitochondrial [Source:HGNC Symbol;Acc:HGNC:11741]
ENSG00000089818	822.536	-0.458838	0.084262	-5.44537	5.16971e-08	8.91961e-07	NECAP1	NECAP endocytosis associated 1 [Source:HGNC Symbol;Acc:HGNC:24539]	981.84	699.169	953.356	675.783	931.334	693.734	NECAP endocytosis associated 1 [Source:HGNC Symbol;Acc:HGNC:24539]
ENSG00000120686	1323.42	-0.396024	0.0727823	-5.44121	5.29207e-08	9.12058e-07	UFM1	ubiquitin fold modifier 1 [Source:HGNC Symbol;Acc:HGNC:20597]	1515.16	1131.36	1527.08	1122.51	1479.18	1165.27	ubiquitin fold modifier 1 [Source:HGNC Symbol;Acc:HGNC:20597]
ENSG00000133247	105.235	1.06163	0.195124	5.44081	5.30388e-08	9.1308e-07	SUV420H2	lysine methyltransferase 5C [Source:HGNC Symbol;Acc:HGNC:28405]	81.0762	146.059	49.4378	143.59	52.3495	158.9	lysine methyltransferase 5C [Source:HGNC Symbol;Acc:HGNC:28405]
ENSG00000130052	42.3829	-1.31676	0.242245	-5.43566	5.45947e-08	9.38823e-07	STARD8	StAR related lipid transfer domain containing 8 [Source:HGNC Symbol;Acc:HGNC:19161]	84.7952	19.1553	71.4101	15.9544	47.4798	15.5024	StAR related lipid transfer domain containing 8 [Source:HGNC Symbol;Acc:HGNC:19161]
ENSG00000198720	168.777	0.812699	0.149609	5.43216	5.56763e-08	9.56363e-07	ANKRD13B	ankyrin repeat domain 13B [Source:HGNC Symbol;Acc:HGNC:26363]	119.755	216.695	121.458	234.758	112.004	207.991	ankyrin repeat domain 13B [Source:HGNC Symbol;Acc:HGNC:26363]
ENSG00000119946	217.597	0.796981	0.146917	5.42471	5.80478e-08	9.95996e-07	CNNM1	cyclin and CBS domain divalent metal cation transport mediator 1 [Source:HGNC Symbol;Acc:HGNC:102]	179.26	268.175	137.327	301.994	143.657	275.168	cyclin and CBS domain divalent metal cation transport mediator 1 [Source:HGNC Symbol;Acc:HGNC:102]
ENSG00000071054	11667.1	0.337208	0.0621767	5.42339	5.848e-08	1.0023e-06	MAP4K4	mitogen-activated protein kinase kinase kinase kinase 4 [Source:HGNC Symbol;Acc:HGNC:6866]	10957.2	12615	9952.86	13319.6	9956.14	13201.6	mitogen-activated protein kinase kinase kinase kinase 4 [Source:HGNC Symbol;Acc:HGNC:6866]
ENSG00000204592	31492.5	-0.308451	0.0569309	-5.41799	6.02715e-08	1.03187e-06	HLA-E	major histocompatibility complex, class I, E [Source:HGNC Symbol;Acc:HGNC:4962]	35695.1	28273.3	32926.2	28207.4	36048.1	27804.9	major histocompatibility complex, class I, E [Source:HGNC Symbol;Acc:HGNC:4962]
ENSG00000197119	970.971	0.569119	0.105136	5.41317	6.19195e-08	1.05891e-06	SLC25A29	solute carrier family 25 member 29 [Source:HGNC Symbol;Acc:HGNC:20116]	824.15	1106.22	836.17	1275.21	654.977	1129.09	solute carrier family 25 member 29 [Source:HGNC Symbol;Acc:HGNC:20116]
ENSG00000149782	655.22	0.538425	0.0995491	5.40864	6.35053e-08	1.08484e-06	PLCB3	phospholipase C beta 3 [Source:HGNC Symbol;Acc:HGNC:9056]	545.962	798.538	536.491	841.025	505.234	704.069	phospholipase C beta 3 [Source:HGNC Symbol;Acc:HGNC:9056]
ENSG00000198695	7114.98	0.440059	0.0815948	5.39322	6.92072e-08	1.18094e-06	MT-ND6	mitochondrially encoded NADH:ubiquinone oxidoreductase core subunit 6 [Source:HGNC Symbol;Acc:HGNC:7462]	6313.53	7695.65	5469.28	9076.91	6251.5	7882.99	mitochondrially encoded NADH:ubiquinone oxidoreductase core subunit 6 [Source:HGNC Symbol;Acc:HGNC:7462]
ENSG00000054965	1038.68	0.557771	0.103438	5.39233	6.95497e-08	1.18548e-06	FAM168A	family with sequence similarity 168 member A [Source:HGNC Symbol;Acc:HGNC:28999]	917.128	1283.41	879.504	1192.02	692.718	1267.32	family with sequence similarity 168 member A [Source:HGNC Symbol;Acc:HGNC:28999]
ENSG00000151208	2378.96	0.470411	0.0873028	5.38826	7.11415e-08	1.21128e-06	DLG5	discs large MAGUK scaffold protein 5 [Source:HGNC Symbol;Acc:HGNC:2904]	2175.67	2599.14	1987.89	2732.76	1779.88	2998.43	discs large MAGUK scaffold protein 5 [Source:HGNC Symbol;Acc:HGNC:2904]
ENSG00000105835	4200.93	-0.435704	0.0809205	-5.38434	7.27101e-08	1.23663e-06	NAMPT	nicotinamide phosphoribosyltransferase [Source:HGNC Symbol;Acc:HGNC:30092]	5313.84	3646.7	4303.53	3445.01	4924.51	3572.02	nicotinamide phosphoribosyltransferase [Source:HGNC Symbol;Acc:HGNC:30092]
ENSG00000114573	2430.41	-0.373185	0.0693641	-5.3801	7.44465e-08	1.26477e-06	ATP6V1A	ATPase H+ transporting V1 subunit A [Source:HGNC Symbol;Acc:HGNC:851]	2723.86	2140.61	2899.74	2148.15	2619.91	2050.2	ATPase H+ transporting V1 subunit A [Source:HGNC Symbol;Acc:HGNC:851]
ENSG00000135108	2330.44	0.423181	0.0787034	5.37691	7.57738e-08	1.28592e-06	FBXO21	F-box protein 21 [Source:HGNC Symbol;Acc:HGNC:13592]	1893.02	2538.08	1986.06	2559.54	2070.85	2935.13	F-box protein 21 [Source:HGNC Symbol;Acc:HGNC:13592]
ENSG00000072121	5150.96	-0.422121	0.0785961	-5.37076	7.8406e-08	1.32913e-06	ZFYVE26	zinc finger FYVE-type containing 26 [Source:HGNC Symbol;Acc:HGNC:20761]	6249.56	4778.06	5812.3	3943.01	5687.83	4434.99	zinc finger FYVE-type containing 26 [Source:HGNC Symbol;Acc:HGNC:20761]
ENSG00000053371	606.569	0.625356	0.116496	5.36806	7.95862e-08	1.34767e-06	AKR7A2	aldo-keto reductase family 7 member A2 [Source:HGNC Symbol;Acc:HGNC:389]	509.515	694.381	465.692	867.235	433.405	669.188	aldo-keto reductase family 7 member A2 [Source:HGNC Symbol;Acc:HGNC:389]
ENSG00000150764	595.591	0.5554	0.103512	5.36557	8.06948e-08	1.36495e-06	DIXDC1	DIX domain containing 1 [Source:HGNC Symbol;Acc:HGNC:23695]	462.655	736.283	480.34	633.617	489.407	771.246	DIX domain containing 1 [Source:HGNC Symbol;Acc:HGNC:23695]
ENSG00000198740	340.674	0.657173	0.122505	5.36446	8.11932e-08	1.37188e-06	ZNF652	zinc finger protein 652 [Source:HGNC Symbol;Acc:HGNC:29147]	240.997	463.319	257.565	405.697	282.444	394.02	zinc finger protein 652 [Source:HGNC Symbol;Acc:HGNC:29147]
ENSG00000140548	504.583	-0.574546	0.107122	-5.36348	8.16347e-08	1.37784e-06	ZNF710	zinc finger protein 710 [Source:HGNC Symbol;Acc:HGNC:25352]	662.742	399.867	606.681	410.256	553.931	394.02	zinc finger protein 710 [Source:HGNC Symbol;Acc:HGNC:25352]
ENSG00000221914	1212.73	-0.472064	0.0880579	-5.36084	8.2836e-08	1.3966e-06	PPP2R2A	protein phosphatase 2 regulatory subunit Balpha [Source:HGNC Symbol;Acc:HGNC:9304]	1344.82	1103.83	1409.28	929.913	1493.79	994.739	protein phosphatase 2 regulatory subunit Balpha [Source:HGNC Symbol;Acc:HGNC:9304]
ENSG00000198890	285.916	0.69257	0.1292	5.36045	8.30168e-08	1.39813e-06	PRMT6	protein arginine methyltransferase 6 [Source:HGNC Symbol;Acc:HGNC:18241]	187.442	363.951	233.761	352.136	220.355	357.848	protein arginine methyltransferase 6 [Source:HGNC Symbol;Acc:HGNC:18241]
ENSG00000128656	2325.47	-0.45546	0.0849822	-5.35947	8.34648e-08	1.40415e-06	CHN1	chimerin 1 [Source:HGNC Symbol;Acc:HGNC:1943]	2498.48	2060.39	2604.33	1830.2	3000.97	1958.47	chimerin 1 [Source:HGNC Symbol;Acc:HGNC:1943]
ENSG00000067066	6520.41	-0.442074	0.0825284	-5.35664	8.47857e-08	1.42482e-06	SP100	SP100 nuclear antigen [Source:HGNC Symbol;Acc:HGNC:11206]	7648.68	6201.54	7559.1	4855.83	7405.63	5451.69	SP100 nuclear antigen [Source:HGNC Symbol;Acc:HGNC:11206]
ENSG00000237276	130.026	-0.889915	0.166271	-5.3522	8.68924e-08	1.45772e-06	ANO7P1	anoctamin 7 like 1 [Source:HGNC Symbol;Acc:HGNC:32248]	173.31	86.199	164.793	85.47	183.832	86.5552	anoctamin 7 like 1 [Source:HGNC Symbol;Acc:HGNC:32248]
ENSG00000158270	926.399	0.533612	0.0997012	5.35212	8.6931e-08	1.45772e-06	COLEC12	collectin subfamily member 12 [Source:HGNC Symbol;Acc:HGNC:16016]	684.313	1004.46	730.58	1135.04	840.027	1163.97	collectin subfamily member 12 [Source:HGNC Symbol;Acc:HGNC:16016]
ENSG00000084774	853.903	0.542663	0.101501	5.34639	8.97242e-08	1.50293e-06	CAD	carbamoyl-phosphate synthetase 2, aspartate transcarbamylase, and dihydroorotase [Source:HGNC Symbol;Acc:HGNC:1424]	690.263	929.033	721.425	1161.25	652.543	968.902	carbamoyl-phosphate synthetase 2, aspartate transcarbamylase, and dihydroorotase [Source:HGNC Symbol;Acc:HGNC:1424]
ENSG00000136478	712.666	0.506659	0.0948013	5.34443	9.07041e-08	1.5177e-06	TEX2	testis expressed 2 [Source:HGNC Symbol;Acc:HGNC:30884]	601.749	841.637	614.615	878.631	533.234	806.126	testis expressed 2 [Source:HGNC Symbol;Acc:HGNC:30884]
ENSG00000163430	32388.7	-0.343725	0.0643201	-5.34398	9.0928e-08	1.51981e-06	FSTL1	follistatin like 1 [Source:HGNC Symbol;Acc:HGNC:3972]	35242.1	29688.4	34647.3	27745.8	38988.2	28020.6	follistatin like 1 [Source:HGNC Symbol;Acc:HGNC:3972]
ENSG00000171314	775.866	-0.553685	0.103616	-5.34361	9.11156e-08	1.52131e-06	PGAM1	phosphoglycerate mutase 1 [Source:HGNC Symbol;Acc:HGNC:8888]	926.797	586.632	830.066	663.247	1034.82	613.638	phosphoglycerate mutase 1 [Source:HGNC Symbol;Acc:HGNC:8888]
ENSG00000163512	1026.82	-0.49576	0.0928401	-5.33993	9.29809e-08	1.55078e-06	AZI2	5-azacytidine induced 2 [Source:HGNC Symbol;Acc:HGNC:24002]	1236.23	937.414	1205.43	752.136	1179.69	850.05	5-azacytidine induced 2 [Source:HGNC Symbol;Acc:HGNC:24002]
ENSG00000006534	1996.4	0.366966	0.068844	5.3304	9.7998e-08	1.6327e-06	ALDH3B1	aldehyde dehydrogenase 3 family member B1 [Source:HGNC Symbol;Acc:HGNC:410]	1750.95	2354.91	1763.28	2247.29	1701.97	2160.01	aldehyde dehydrogenase 3 family member B1 [Source:HGNC Symbol;Acc:HGNC:410]
ENSG00000048028	828.559	-0.507117	0.0951521	-5.32954	9.84625e-08	1.63868e-06	USP28	ubiquitin specific peptidase 28 [Source:HGNC Symbol;Acc:HGNC:12625]	974.401	713.536	949.083	601.709	1010.47	722.155	ubiquitin specific peptidase 28 [Source:HGNC Symbol;Acc:HGNC:12625]
ENSG00000101955	1278.86	0.438927	0.0823957	5.32707	9.98122e-08	1.65936e-06	SRPX	sushi repeat containing protein, X-linked [Source:HGNC Symbol;Acc:HGNC:11309]	1146.22	1403.13	1067.49	1571.51	1026.29	1458.52	sushi repeat containing protein, X-linked [Source:HGNC Symbol;Acc:HGNC:11309]
ENSG00000163697	1387.98	-0.504165	0.094646	-5.32684	9.99338e-08	1.65961e-06	APBB2	amyloid beta precursor protein binding family B member 2 [Source:HGNC Symbol;Acc:HGNC:582]	1545.65	1248.69	1611.31	994.871	1754.32	1173.02	amyloid beta precursor protein binding family B member 2 [Source:HGNC Symbol;Acc:HGNC:582]
ENSG00000083799	2188.59	-0.404159	0.0759037	-5.32464	1.01155e-07	1.67809e-06	CYLD	CYLD lysine 63 deubiquitinase [Source:HGNC Symbol;Acc:HGNC:2584]	2592.95	2023.28	2411.46	1750.43	2495.73	1857.71	CYLD lysine 63 deubiquitinase [Source:HGNC Symbol;Acc:HGNC:2584]
ENSG00000170043	993.13	0.459604	0.0863258	5.32407	1.01471e-07	1.68154e-06	TRAPPC1	trafficking protein particle complex 1 [Source:HGNC Symbol;Acc:HGNC:19894]	887.375	1125.38	791.004	1219.37	816.896	1118.76	trafficking protein particle complex 1 [Source:HGNC Symbol;Acc:HGNC:19894]
ENSG00000107282	397.27	0.595226	0.111816	5.32326	1.01922e-07	1.6872e-06	APBA1	amyloid beta precursor protein binding family A member 1 [Source:HGNC Symbol;Acc:HGNC:578]	320.586	486.066	308.834	443.304	306.792	518.04	amyloid beta precursor protein binding family A member 1 [Source:HGNC Symbol;Acc:HGNC:578]
ENSG00000124875	147.331	-0.974041	0.183038	-5.32153	1.02896e-07	1.70151e-06	CXCL6	C-X-C motif chemokine ligand 6 [Source:HGNC Symbol;Acc:HGNC:10643]	232.815	87.3962	165.403	74.074	210.615	113.684	C-X-C motif chemokine ligand 6 [Source:HGNC Symbol;Acc:HGNC:10643]
ENSG00000101846	1379.29	-0.389653	0.0733216	-5.3143	1.07067e-07	1.7686e-06	STS	steroid sulfatase (microsomal), isozyme S [Source:HGNC Symbol;Acc:HGNC:11425]	1511.44	1200.8	1596.05	1201.14	1598.49	1167.85	steroid sulfatase (microsomal), isozyme S [Source:HGNC Symbol;Acc:HGNC:11425]
ENSG00000162885	638.381	0.51655	0.097259	5.31108	1.0898e-07	1.79657e-06	B3GALNT2	beta-1,3-N-acetylgalactosaminyltransferase 2 [Source:HGNC Symbol;Acc:HGNC:28596]	551.169	732.691	532.829	790.882	476.015	746.7	beta-1,3-N-acetylgalactosaminyltransferase 2 [Source:HGNC Symbol;Acc:HGNC:28596]
ENSG00000198796	1207.01	-0.526074	0.0990525	-5.31106	1.08992e-07	1.79657e-06	ALPK2	alpha kinase 2 [Source:HGNC Symbol;Acc:HGNC:20565]	1410.28	1101.43	1472.15	830.768	1415.87	1011.53	alpha kinase 2 [Source:HGNC Symbol;Acc:HGNC:20565]
ENSG00000168005	666.221	0.5834	0.109873	5.30977	1.09764e-07	1.80737e-06	C11orf84	chromosome 11 open reading frame 84 [Source:HGNC Symbol;Acc:HGNC:25115]	579.434	717.128	516.96	896.865	482.102	804.834	chromosome 11 open reading frame 84 [Source:HGNC Symbol;Acc:HGNC:25115]
ENSG00000108424	6004.6	-0.354498	0.066849	-5.30297	1.13937e-07	1.87409e-06	KPNB1	karyopherin subunit beta 1 [Source:HGNC Symbol;Acc:HGNC:6400]	6791.8	5643.64	6877.34	4920.79	6582.64	5211.4	karyopherin subunit beta 1 [Source:HGNC Symbol;Acc:HGNC:6400]
ENSG00000055208	1772.4	-0.379344	0.0715676	-5.3005	1.15488e-07	1.8976e-06	TAB2	TGF-beta activated kinase 1/MAP3K7 binding protein 2 [Source:HGNC Symbol;Acc:HGNC:17075]	1933.18	1576.72	2033.66	1467.8	2059.89	1563.16	TGF-beta activated kinase 1/MAP3K7 binding protein 2 [Source:HGNC Symbol;Acc:HGNC:17075]
ENSG00000132688	317.603	0.849322	0.160249	5.30003	1.15786e-07	1.90048e-06	NES	nestin [Source:HGNC Symbol;Acc:HGNC:7756]	243.228	377.12	253.903	451.281	147.309	432.776	nestin [Source:HGNC Symbol;Acc:HGNC:7756]
ENSG00000089737	3862.15	0.317911	0.0600268	5.29614	1.18276e-07	1.9393e-06	DDX24	DEAD-box helicase 24 [Source:HGNC Symbol;Acc:HGNC:13266]	3478.09	4372.2	3329.42	4322.5	3492.81	4177.9	DEAD-box helicase 24 [Source:HGNC Symbol;Acc:HGNC:13266]
ENSG00000116406	2019.35	0.427751	0.0807792	5.2953	1.18818e-07	1.94614e-06	EDEM3	ER degradation enhancing alpha-mannosidase like protein 3 [Source:HGNC Symbol;Acc:HGNC:16787]	1736.07	2214.83	1792.58	2541.31	1611.88	2219.43	ER degradation enhancing alpha-mannosidase like protein 3 [Source:HGNC Symbol;Acc:HGNC:16787]
ENSG00000136235	823.246	0.485845	0.0917693	5.2942	1.19539e-07	1.95587e-06	GPNMB	glycoprotein nmb [Source:HGNC Symbol;Acc:HGNC:4462]	649.353	972.133	675.65	894.586	720.719	1027.04	glycoprotein nmb [Source:HGNC Symbol;Acc:HGNC:4462]
ENSG00000126705	975.281	0.505325	0.0954723	5.2929	1.20393e-07	1.96777e-06	AHDC1	AT-hook DNA binding motif containing 1 [Source:HGNC Symbol;Acc:HGNC:25230]	859.854	1089.46	756.825	1276.35	784.025	1085.17	AT-hook DNA binding motif containing 1 [Source:HGNC Symbol;Acc:HGNC:25230]
ENSG00000119541	1477.87	-0.407935	0.077129	-5.289	1.2299e-07	2.0081e-06	VPS4B	vacuolar protein sorting 4 homolog B [Source:HGNC Symbol;Acc:HGNC:10895]	1644.58	1340.87	1747.41	1192.02	1677.62	1264.74	vacuolar protein sorting 4 homolog B [Source:HGNC Symbol;Acc:HGNC:10895]
ENSG00000133874	126.186	-0.942031	0.178211	-5.28604	1.24993e-07	2.03866e-06	RNF122	ring finger protein 122 [Source:HGNC Symbol;Acc:HGNC:21147]	194.136	65.8464	164.182	85.47	157.048	90.4308	ring finger protein 122 [Source:HGNC Symbol;Acc:HGNC:21147]
ENSG00000069702	888.281	0.447541	0.0846897	5.28448	1.26062e-07	2.05394e-06	TGFBR3	transforming growth factor beta receptor 3 [Source:HGNC Symbol;Acc:HGNC:11774]	750.512	1070.3	778.798	1006.27	710.979	1012.83	transforming growth factor beta receptor 3 [Source:HGNC Symbol;Acc:HGNC:11774]
ENSG00000138642	5142.34	-0.388796	0.0735883	-5.28339	1.26813e-07	2.064e-06	HERC6	HECT and RLD domain containing E3 ubiquitin protein ligase family member 6 [Source:HGNC Symbol;Acc:HGNC:26072]	5896.24	4873.83	5856.85	4055.84	5782.79	4388.48	HECT and RLD domain containing E3 ubiquitin protein ligase family member 6 [Source:HGNC Symbol;Acc:HGNC:26072]
ENSG00000166250	7330.2	-0.313601	0.0593683	-5.28229	1.27577e-07	2.07427e-06	CLMP	CXADR like membrane protein [Source:HGNC Symbol;Acc:HGNC:24039]	8072.66	6790.56	7927.74	6297.43	8406.36	6486.47	CXADR like membrane protein [Source:HGNC Symbol;Acc:HGNC:24039]
ENSG00000163660	5089.9	-0.433906	0.0821487	-5.28196	1.27812e-07	2.07591e-06	CCNL1	cyclin L1 [Source:HGNC Symbol;Acc:HGNC:20569]	6378.98	4717	5856.24	4180.05	5371.3	4035.8	cyclin L1 [Source:HGNC Symbol;Acc:HGNC:20569]
ENSG00000021355	512.417	-0.632641	0.119906	-5.27613	1.31939e-07	2.1407e-06	SERPINB1	serpin family B member 1 [Source:HGNC Symbol;Acc:HGNC:3311]	591.335	381.909	579.826	360.114	719.501	441.819	serpin family B member 1 [Source:HGNC Symbol;Acc:HGNC:3311]
ENSG00000034677	847.373	-0.500887	0.0949448	-5.27556	1.32352e-07	2.14515e-06	RNF19A	ring finger protein 19A, RBR E3 ubiquitin protein ligase [Source:HGNC Symbol;Acc:HGNC:13432]	961.013	703.958	966.173	633.617	1068.9	750.576	ring finger protein 19A, RBR E3 ubiquitin protein ligase [Source:HGNC Symbol;Acc:HGNC:13432]
ENSG00000085365	1516	-0.431509	0.0818147	-5.27422	1.3332e-07	2.15859e-06	SCAMP1	secretory carrier membrane protein 1 [Source:HGNC Symbol;Acc:HGNC:10563]	1665.41	1356.44	1763.28	1172.65	1812.75	1325.46	secretory carrier membrane protein 1 [Source:HGNC Symbol;Acc:HGNC:10563]
ENSG00000105974	20508.1	-0.305424	0.057919	-5.2733	1.33991e-07	2.16719e-06	CAV1	caveolin 1 [Source:HGNC Symbol;Acc:HGNC:1527]	22451.4	18866.8	23772.9	18308.8	21868.7	17780	caveolin 1 [Source:HGNC Symbol;Acc:HGNC:1527]
ENSG00000109686	1775.67	0.434528	0.0824064	5.27299	1.34217e-07	2.16859e-06	SH3D19	SH3 domain containing 19 [Source:HGNC Symbol;Acc:HGNC:30418]	1418.46	2163.35	1641.21	1948.72	1446.31	2035.99	SH3 domain containing 19 [Source:HGNC Symbol;Acc:HGNC:30418]
ENSG00000226380	183.789	-0.865082	0.164145	-5.27023	1.36256e-07	2.19694e-06	AC058791.1	microRNA 29a [Source:HGNC Symbol;Acc:HGNC:31616]	278.188	125.707	230.71	145.869	222.79	99.4739	microRNA 29a [Source:HGNC Symbol;Acc:HGNC:31616]
ENSG00000158290	3291.37	-0.42959	0.0815124	-5.27024	1.36248e-07	2.19694e-06	CUL4B	cullin 4B [Source:HGNC Symbol;Acc:HGNC:2555]	3522.72	3086.4	3993.47	2631.34	3855.6	2658.67	cullin 4B [Source:HGNC Symbol;Acc:HGNC:2555]
ENSG00000184384	1440.87	-0.451844	0.0858143	-5.26538	1.39903e-07	2.25341e-06	MAML2	mastermind like transcriptional coactivator 2 [Source:HGNC Symbol;Acc:HGNC:16259]	1710.04	1302.56	1561.87	1106.55	1743.36	1220.82	mastermind like transcriptional coactivator 2 [Source:HGNC Symbol;Acc:HGNC:16259]
ENSG00000104738	952.782	0.449247	0.0854964	5.25457	1.48374e-07	2.38737e-06	MCM4	minichromosome maintenance complex component 4 [Source:HGNC Symbol;Acc:HGNC:6947]	773.571	1158.9	848.377	1097.43	780.373	1058.04	minichromosome maintenance complex component 4 [Source:HGNC Symbol;Acc:HGNC:6947]
ENSG00000125834	1019.25	0.505604	0.0962254	5.25437	1.48531e-07	2.38742e-06	STK35	serine/threonine kinase 35 [Source:HGNC Symbol;Acc:HGNC:16254]	921.59	1128.97	812.366	1168.09	770.633	1313.83	serine/threonine kinase 35 [Source:HGNC Symbol;Acc:HGNC:16254]
ENSG00000047634	850.973	-0.453594	0.0863554	-5.25265	1.4993e-07	2.40742e-06	SCML1	sex comb on midleg-like 1 (Drosophila) [Source:HGNC Symbol;Acc:HGNC:10580]	967.707	753.044	1024.77	687.179	969.074	704.069	sex comb on midleg-like 1 (Drosophila) [Source:HGNC Symbol;Acc:HGNC:10580]
ENSG00000169446	546.342	-0.544336	0.103645	-5.25192	1.50526e-07	2.41448e-06	MMGT1	membrane magnesium transporter 1 [Source:HGNC Symbol;Acc:HGNC:28100]	619.6	474.094	695.791	419.373	641.586	427.609	membrane magnesium transporter 1 [Source:HGNC Symbol;Acc:HGNC:28100]
ENSG00000028277	1420.62	-0.635641	0.121057	-5.25076	1.51476e-07	2.42721e-06	POU2F2	POU class 2 homeobox 2 [Source:HGNC Symbol;Acc:HGNC:9213]	2051.45	984.105	1755.35	1263.82	1432.92	1036.08	POU class 2 homeobox 2 [Source:HGNC Symbol;Acc:HGNC:9213]
ENSG00000132294	3041.24	-0.411958	0.0784921	-5.24841	1.53419e-07	2.45341e-06	EFR3A	EFR3 homolog A [Source:HGNC Symbol;Acc:HGNC:28970]	3345.69	2884.07	3588.82	2476.35	3514.72	2437.76	EFR3 homolog A [Source:HGNC Symbol;Acc:HGNC:28970]
ENSG00000140474	293.879	0.646484	0.123177	5.2484	1.53427e-07	2.45341e-06	ULK3	unc-51 like kinase 3 [Source:HGNC Symbol;Acc:HGNC:19703]	230.584	341.204	223.996	393.162	220.355	353.972	unc-51 like kinase 3 [Source:HGNC Symbol;Acc:HGNC:19703]
ENSG00000166963	6962.23	0.455187	0.0867395	5.24775	1.53968e-07	2.45953e-06	MAP1A	microtubule associated protein 1A [Source:HGNC Symbol;Acc:HGNC:6835]	6422.12	8512.15	6076.57	8004.55	5015.81	7742.17	microtubule associated protein 1A [Source:HGNC Symbol;Acc:HGNC:6835]
ENSG00000004478	415.009	0.656864	0.125202	5.24641	1.55088e-07	2.47486e-06	FKBP4	FK506 binding protein 4 [Source:HGNC Symbol;Acc:HGNC:3720]	316.123	483.672	310.665	607.407	322.619	449.57	FK506 binding protein 4 [Source:HGNC Symbol;Acc:HGNC:3720]
ENSG00000156011	1690.78	0.455417	0.0868744	5.24225	1.58629e-07	2.52877e-06	PSD3	pleckstrin and Sec7 domain containing 3 [Source:HGNC Symbol;Acc:HGNC:19093]	1299.45	2049.62	1468.49	1778.92	1487.7	2060.53	pleckstrin and Sec7 domain containing 3 [Source:HGNC Symbol;Acc:HGNC:19093]
ENSG00000137845	7193.17	-0.360306	0.0687375	-5.24177	1.59043e-07	2.53276e-06	ADAM10	ADAM metallopeptidase domain 10 [Source:HGNC Symbol;Acc:HGNC:188]	7883.73	6773.8	8339.73	5826.77	8084.95	6250.06	ADAM metallopeptidase domain 10 [Source:HGNC Symbol;Acc:HGNC:188]
ENSG00000129451	90.3694	-1.11366	0.212528	-5.24007	1.60516e-07	2.55361e-06	KLK10	kallikrein related peptidase 10 [Source:HGNC Symbol;Acc:HGNC:6358]	129.424	53.8744	108.031	60.3988	159.483	31.0049	kallikrein related peptidase 10 [Source:HGNC Symbol;Acc:HGNC:6358]
ENSG00000107738	1317.95	-0.639327	0.122107	-5.23578	1.64286e-07	2.60748e-06	C10orf54	chromosome 10 open reading frame 54 [Source:HGNC Symbol;Acc:HGNC:30085]	1457.88	954.175	1451.4	904.842	1962.5	1176.89	chromosome 10 open reading frame 54 [Source:HGNC Symbol;Acc:HGNC:30085]
ENSG00000064687	579.945	0.608283	0.116178	5.23579	1.64283e-07	2.60748e-06	ABCA7	ATP binding cassette subfamily A member 7 [Source:HGNC Symbol;Acc:HGNC:37]	490.92	763.819	486.443	662.107	376.186	700.193	ATP binding cassette subfamily A member 7 [Source:HGNC Symbol;Acc:HGNC:37]
ENSG00000105499	1046.65	-0.46808	0.0894026	-5.23565	1.64407e-07	2.60748e-06	PLA2G4C	phospholipase A2 group IVC [Source:HGNC Symbol;Acc:HGNC:9037]	1340.36	863.187	1140.73	896.865	1179.69	859.093	phospholipase A2 group IVC [Source:HGNC Symbol;Acc:HGNC:9037]
ENSG00000198732	2229.2	1.1422	0.218285	5.23259	1.67155e-07	2.64835e-06	SMOC1	SPARC related modular calcium binding 1 [Source:HGNC Symbol;Acc:HGNC:20318]	1370.11	2293.85	1201.15	4156.12	924.029	3429.91	SPARC related modular calcium binding 1 [Source:HGNC Symbol;Acc:HGNC:20318]
ENSG00000166881	735.115	-0.488603	0.0933973	-5.23145	1.68187e-07	2.66199e-06	TMEM194A	nuclear envelope integral membrane protein 1 [Source:HGNC Symbol;Acc:HGNC:29001]	880.68	633.323	836.78	553.845	870.463	635.6	nuclear envelope integral membrane protein 1 [Source:HGNC Symbol;Acc:HGNC:29001]
ENSG00000116793	890.007	-0.471936	0.0902264	-5.23057	1.68984e-07	2.67188e-06	PHTF1	putative homeodomain transcription factor 1 [Source:HGNC Symbol;Acc:HGNC:8939]	1026.47	814.101	1071.76	701.993	1017.77	707.944	putative homeodomain transcription factor 1 [Source:HGNC Symbol;Acc:HGNC:8939]
ENSG00000166710	111276	-0.325297	0.0622472	-5.22589	1.73316e-07	2.73758e-06	B2M	beta-2-microglobulin [Source:HGNC Symbol;Acc:HGNC:914]	119278	97932.8	118701	98256.3	133897	99594.1	beta-2-microglobulin [Source:HGNC Symbol;Acc:HGNC:914]
ENSG00000135931	1631.43	0.374486	0.0716773	5.22461	1.74524e-07	2.75385e-06	ARMC9	armadillo repeat containing 9 [Source:HGNC Symbol;Acc:HGNC:20730]	1445.24	1765.88	1412.33	1923.64	1391.52	1849.96	armadillo repeat containing 9 [Source:HGNC Symbol;Acc:HGNC:20730]
ENSG00000175066	486.745	0.608674	0.116509	5.22425	1.74858e-07	2.75633e-06	GK5	glycerol kinase 5 (putative) [Source:HGNC Symbol;Acc:HGNC:28635]	356.289	584.237	436.395	569.8	343.315	630.432	glycerol kinase 5 (putative) [Source:HGNC Symbol;Acc:HGNC:28635]
ENSG00000071564	1015.91	0.495872	0.0949456	5.22269	1.76339e-07	2.77685e-06	TCF3	transcription factor 3 [Source:HGNC Symbol;Acc:HGNC:11633]	894.813	1113.4	860.584	1293.45	751.154	1182.06	transcription factor 3 [Source:HGNC Symbol;Acc:HGNC:11633]
ENSG00000196352	850.268	-0.503564	0.0966114	-5.21227	1.86547e-07	2.93462e-06	CD55	CD55 molecule (Cromer blood group) [Source:HGNC Symbol;Acc:HGNC:2665]	1075.56	630.929	975.938	755.555	955.683	707.944	CD55 molecule (Cromer blood group) [Source:HGNC Symbol;Acc:HGNC:2665]
ENSG00000157020	2147.12	0.391145	0.0750794	5.20975	1.89099e-07	2.96954e-06	SEC13	SEC13 homolog, nuclear pore and COPII coat complex component [Source:HGNC Symbol;Acc:HGNC:10697]	1893.02	2291.46	1845.68	2646.15	1815.19	2391.25	SEC13 homolog, nuclear pore and COPII coat complex component [Source:HGNC Symbol;Acc:HGNC:10697]
ENSG00000167674	1329.08	0.552005	0.105957	5.2097	1.8915e-07	2.96954e-06	HDGFRP2	Hepatoma-derived growth factor-related protein 2 [Source:UniProtKB/Swiss-Prot;Acc:Q7Z4V5]	1184.9	1460.59	1080.92	1814.24	930.117	1503.74	Hepatoma-derived growth factor-related protein 2 [Source:UniProtKB/Swiss-Prot;Acc:Q7Z4V5]
ENSG00000112308	7246.17	-0.380649	0.0730785	-5.20877	1.901e-07	2.98144e-06	C6orf62	chromosome 6 open reading frame 62 [Source:HGNC Symbol;Acc:HGNC:20998]	8501.84	6680.42	8583.25	5898.57	7559.02	6253.94	chromosome 6 open reading frame 62 [Source:HGNC Symbol;Acc:HGNC:20998]
ENSG00000134716	41.8419	-1.23267	0.236707	-5.2076	1.91302e-07	2.9949e-06	CYP2J2	cytochrome P450 family 2 subfamily J member 2 [Source:HGNC Symbol;Acc:HGNC:2634]	66.1998	22.7469	58.5929	14.8148	70.6109	18.0862	cytochrome P450 family 2 subfamily J member 2 [Source:HGNC Symbol;Acc:HGNC:2634]
ENSG00000173145	676.286	-0.579599	0.1113	-5.20756	1.91345e-07	2.9949e-06	NOC3L	NOC3 like DNA replication regulator [Source:HGNC Symbol;Acc:HGNC:24034]	711.834	592.618	865.466	515.099	875.332	497.37	NOC3 like DNA replication regulator [Source:HGNC Symbol;Acc:HGNC:24034]
ENSG00000124151	2428.02	-0.376022	0.072213	-5.20713	1.91782e-07	2.99872e-06	NCOA3	nuclear receptor coactivator 3 [Source:HGNC Symbol;Acc:HGNC:7670]	2865.19	2109.48	2720.3	1980.62	2658.87	2233.64	nuclear receptor coactivator 3 [Source:HGNC Symbol;Acc:HGNC:7670]
ENSG00000143499	744.028	-0.507326	0.0974976	-5.20348	1.95595e-07	3.05526e-06	SMYD2	SET and MYND domain containing 2 [Source:HGNC Symbol;Acc:HGNC:20982]	847.952	624.942	819.08	585.754	971.509	614.93	SET and MYND domain containing 2 [Source:HGNC Symbol;Acc:HGNC:20982]
ENSG00000197548	1052.48	-0.445198	0.0855653	-5.20301	1.96083e-07	3.0598e-06	ATG7	autophagy related 7 [Source:HGNC Symbol;Acc:HGNC:16935]	1250.36	948.189	1204.21	812.535	1199.17	900.433	autophagy related 7 [Source:HGNC Symbol;Acc:HGNC:16935]
ENSG00000118402	424.747	0.598457	0.115081	5.20032	1.98942e-07	3.10129e-06	ELOVL4	ELOVL fatty acid elongase 4 [Source:HGNC Symbol;Acc:HGNC:14415]	365.958	506.419	326.533	559.543	305.575	484.451	ELOVL fatty acid elongase 4 [Source:HGNC Symbol;Acc:HGNC:14415]
ENSG00000197536	693.643	-0.708699	0.13649	-5.19231	2.07703e-07	3.23462e-06	C5orf56	chromosome 5 open reading frame 56 [Source:HGNC Symbol;Acc:HGNC:33838]	1001.18	537.546	964.342	464.957	652.543	541.293	chromosome 5 open reading frame 56 [Source:HGNC Symbol;Acc:HGNC:33838]
ENSG00000169908	2208.1	0.617091	0.118879	5.19091	2.09264e-07	3.25566e-06	TM4SF1	transmembrane 4 L six family member 1 [Source:HGNC Symbol;Acc:HGNC:11853]	1787.39	2043.63	1660.13	2917.38	1699.53	3140.53	transmembrane 4 L six family member 1 [Source:HGNC Symbol;Acc:HGNC:11853]
ENSG00000109606	2736.09	-0.401396	0.0773372	-5.19021	2.10058e-07	3.26474e-06	DHX15	DEAH-box helicase 15 [Source:HGNC Symbol;Acc:HGNC:2738]	3157.51	2512.94	3170.73	2110.54	3038.71	2426.13	DEAH-box helicase 15 [Source:HGNC Symbol;Acc:HGNC:2738]
ENSG00000129422	90.7158	0.990664	0.190902	5.18938	2.10999e-07	3.27609e-06	MTUS1	microtubule associated tumor suppressor 1 [Source:HGNC Symbol;Acc:HGNC:29789]	56.5302	136.482	62.8653	121.937	45.0449	121.436	microtubule associated tumor suppressor 1 [Source:HGNC Symbol;Acc:HGNC:29789]
ENSG00000107960	231.842	0.733058	0.141343	5.18636	2.14439e-07	3.32617e-06	OBFC1	STN1, CST complex subunit [Source:HGNC Symbol;Acc:HGNC:26200]	165.128	250.216	167.844	322.507	175.31	310.049	STN1, CST complex subunit [Source:HGNC Symbol;Acc:HGNC:26200]
ENSG00000145349	2766.1	-0.433141	0.0835331	-5.18526	2.15708e-07	3.34251e-06	CAMK2D	calcium/calmodulin dependent protein kinase II delta [Source:HGNC Symbol;Acc:HGNC:1462]	3069.74	2597.94	3158.52	2098	3341.85	2330.53	calcium/calmodulin dependent protein kinase II delta [Source:HGNC Symbol;Acc:HGNC:1462]
ENSG00000198663	2319.89	0.326155	0.0629158	5.18398	2.17196e-07	3.3622e-06	C6orf89	chromosome 6 open reading frame 89 [Source:HGNC Symbol;Acc:HGNC:21114]	2037.32	2607.52	2094.7	2564.1	2030.67	2585.03	chromosome 6 open reading frame 89 [Source:HGNC Symbol;Acc:HGNC:21114]
ENSG00000165685	69.5301	-1.09708	0.211645	-5.18356	2.17686e-07	3.36642e-06	TMEM52B	transmembrane protein 52B [Source:HGNC Symbol;Acc:HGNC:26438]	98.9278	40.7051	85.448	35.3276	119.308	37.4642	transmembrane protein 52B [Source:HGNC Symbol;Acc:HGNC:26438]
ENSG00000122862	63.4377	-1.15805	0.22359	-5.17936	2.22645e-07	3.43626e-06	SRGN	serglycin [Source:HGNC Symbol;Acc:HGNC:9361]	94.4649	40.7051	83.617	35.3276	107.134	19.378	serglycin [Source:HGNC Symbol;Acc:HGNC:9361]
ENSG00000166167	1294.14	0.437732	0.0845123	5.1795	2.22477e-07	3.43626e-06	BTRC	beta-transducin repeat containing E3 ubiquitin protein ligase [Source:HGNC Symbol;Acc:HGNC:1144]	1140.27	1409.11	1137.07	1563.53	999.51	1515.36	beta-transducin repeat containing E3 ubiquitin protein ligase [Source:HGNC Symbol;Acc:HGNC:1144]
ENSG00000144746	3018.76	-0.318725	0.0616158	-5.17278	2.30639e-07	3.55611e-06	ARL6IP5	ADP ribosylation factor like GTPase 6 interacting protein 5 [Source:HGNC Symbol;Acc:HGNC:16937]	3269.08	2747.59	3406.93	2645.01	3391.76	2652.21	ADP ribosylation factor like GTPase 6 interacting protein 5 [Source:HGNC Symbol;Acc:HGNC:16937]
ENSG00000142192	19344.5	-0.279053	0.0539562	-5.17185	2.31786e-07	3.57024e-06	APP	amyloid beta precursor protein [Source:HGNC Symbol;Acc:HGNC:620]	22144.9	17443.3	20696.7	17413.1	20848.5	17520.3	amyloid beta precursor protein [Source:HGNC Symbol;Acc:HGNC:620]
ENSG00000182670	1468.17	0.521328	0.100805	5.17166	2.32019e-07	3.57028e-06	TTC3	tetratricopeptide repeat domain 3 [Source:HGNC Symbol;Acc:HGNC:12393]	1179.7	1911.94	1353.13	1703.7	1046.99	1613.54	tetratricopeptide repeat domain 3 [Source:HGNC Symbol;Acc:HGNC:12393]
ENSG00000130775	2804.67	-0.367978	0.0711628	-5.17093	2.32926e-07	3.58069e-06	THEMIS2	thymocyte selection associated family member 2 [Source:HGNC Symbol;Acc:HGNC:16839]	3384.37	2371.67	3081.62	2410.25	3033.84	2546.27	thymocyte selection associated family member 2 [Source:HGNC Symbol;Acc:HGNC:16839]
ENSG00000087245	26009.7	0.346572	0.0670271	5.17062	2.33321e-07	3.58321e-06	MMP2	matrix metallopeptidase 2 [Source:HGNC Symbol;Acc:HGNC:7166]	23704	26862.9	22515.6	31177.2	22317.9	29480.5	matrix metallopeptidase 2 [Source:HGNC Symbol;Acc:HGNC:7166]
ENSG00000181019	5185.45	0.425935	0.082395	5.16943	2.3481e-07	3.6025e-06	NQO1	NAD(P)H quinone dehydrogenase 1 [Source:HGNC Symbol;Acc:HGNC:2874]	4549.19	5833.99	4721	6466.09	3939.6	5602.84	NAD(P)H quinone dehydrogenase 1 [Source:HGNC Symbol;Acc:HGNC:2874]
ENSG00000206341	3661.92	-0.379521	0.0734257	-5.16877	2.35639e-07	3.61165e-06	HLA-H	major histocompatibility complex, class I, H (pseudogene) [Source:HGNC Symbol;Acc:HGNC:4965]	4157.94	2906.82	3958.68	3307.12	4338.92	3302.02	major histocompatibility complex, class I, H (pseudogene) [Source:HGNC Symbol;Acc:HGNC:4965]
ENSG00000133731	526.023	-0.51192	0.0990554	-5.16801	2.36595e-07	3.62142e-06	IMPA1	inositol monophosphatase 1 [Source:HGNC Symbol;Acc:HGNC:6050]	606.955	450.15	625.601	429.629	634.281	409.523	inositol monophosphatase 1 [Source:HGNC Symbol;Acc:HGNC:6050]
ENSG00000104823	476.88	0.517451	0.100128	5.1679	2.36743e-07	3.62142e-06	ECH1	enoyl-CoA hydratase 1 [Source:HGNC Symbol;Acc:HGNC:3149]	380.091	577.054	386.957	557.264	400.535	559.379	enoyl-CoA hydratase 1 [Source:HGNC Symbol;Acc:HGNC:3149]
ENSG00000105287	2522.34	-0.422611	0.0817996	-5.16642	2.38626e-07	3.64663e-06	PRKD2	protein kinase D2 [Source:HGNC Symbol;Acc:HGNC:17293]	3119.57	2274.69	2825.28	1948.72	2748.96	2216.85	protein kinase D2 [Source:HGNC Symbol;Acc:HGNC:17293]
ENSG00000197872	236.105	0.724133	0.14021	5.16463	2.40914e-07	3.67797e-06	FAM49A	family with sequence similarity 49 member A [Source:HGNC Symbol;Acc:HGNC:25373]	151.739	314.866	180.051	271.225	188.702	310.049	family with sequence similarity 49 member A [Source:HGNC Symbol;Acc:HGNC:25373]
ENSG00000146556	89.6341	1.01439	0.196618	5.1592	2.48003e-07	3.78247e-06	WASH2P	WAS protein family homolog 2 pseudogene [Source:HGNC Symbol;Acc:HGNC:33145]	52.8111	123.312	56.7619	102.564	49.9146	152.441	WAS protein family homolog 2 pseudogene [Source:HGNC Symbol;Acc:HGNC:33145]
ENSG00000161714	1775.64	0.429546	0.0832707	5.15843	2.49024e-07	3.79431e-06	PLCD3	phospholipase C delta 3 [Source:HGNC Symbol;Acc:HGNC:9061]	1559.04	2075.96	1618.02	2022.79	1334.3	2043.74	phospholipase C delta 3 [Source:HGNC Symbol;Acc:HGNC:9061]
ENSG00000149260	900.89	0.460896	0.0894236	5.15407	2.54888e-07	3.87985e-06	CAPN5	calpain 5 [Source:HGNC Symbol;Acc:HGNC:1482]	795.885	1069.11	776.967	1068.94	684.196	1010.24	calpain 5 [Source:HGNC Symbol;Acc:HGNC:1482]
ENSG00000143337	1732.3	-0.393448	0.0764455	-5.14678	2.65e-07	4.02981e-06	TOR1AIP1	torsin 1A interacting protein 1 [Source:HGNC Symbol;Acc:HGNC:29456]	1895.25	1589.89	1964.08	1411.96	2059.89	1472.73	torsin 1A interacting protein 1 [Source:HGNC Symbol;Acc:HGNC:29456]
ENSG00000227039	41.5083	-1.21007	0.235165	-5.14561	2.66647e-07	4.0509e-06	ITGB2-AS1	ITGB2 antisense RNA 1 [Source:HGNC Symbol;Acc:HGNC:44304]	65.456	20.3525	58.5929	17.094	68.1761	19.378	ITGB2 antisense RNA 1 [Source:HGNC Symbol;Acc:HGNC:44304]
ENSG00000173757	1110.87	0.403438	0.0784228	5.1444	2.68379e-07	4.07321e-06	STAT5B	signal transducer and activator of transcription 5B [Source:HGNC Symbol;Acc:HGNC:11367]	982.583	1251.08	942.98	1233.05	931.334	1324.17	signal transducer and activator of transcription 5B [Source:HGNC Symbol;Acc:HGNC:11367]
ENSG00000126773	3602.51	-0.382834	0.0744585	-5.14157	2.72445e-07	4.13088e-06	PCNXL4	pecanex homolog 4 (Drosophila) [Source:HGNC Symbol;Acc:HGNC:20349]	4100.67	3340.21	4340.15	2977.77	3819.08	3037.18	pecanex homolog 4 (Drosophila) [Source:HGNC Symbol;Acc:HGNC:20349]
ENSG00000166863	154.31	-0.80709	0.157029	-5.13977	2.75079e-07	4.16674e-06	TAC3	tachykinin 3 [Source:HGNC Symbol;Acc:HGNC:11521]	216.451	105.354	194.089	111.681	192.354	105.933	tachykinin 3 [Source:HGNC Symbol;Acc:HGNC:11521]
ENSG00000196932	81.5995	1.02357	0.199175	5.13904	2.7614e-07	4.17874e-06	TMEM26	transmembrane protein 26 [Source:HGNC Symbol;Acc:HGNC:28550]	44.6291	105.354	48.8274	101.424	51.1321	138.23	transmembrane protein 26 [Source:HGNC Symbol;Acc:HGNC:28550]
ENSG00000092445	207.83	0.74179	0.144442	5.13555	2.81319e-07	4.25296e-06	TYRO3	TYRO3 protein tyrosine kinase [Source:HGNC Symbol;Acc:HGNC:12446]	148.02	239.442	156.858	300.854	147.309	254.498	TYRO3 protein tyrosine kinase [Source:HGNC Symbol;Acc:HGNC:12446]
ENSG00000153936	511.338	0.52697	0.10265	5.13365	2.84182e-07	4.28372e-06	HS2ST1	heparan sulfate 2-O-sulfotransferase 1 [Source:HGNC Symbol;Acc:HGNC:5193]	427.695	652.478	423.578	585.754	392.013	586.509	heparan sulfate 2-O-sulfotransferase 1 [Source:HGNC Symbol;Acc:HGNC:5193]
ENSG00000105939	12543	0.332405	0.0647503	5.13365	2.84177e-07	4.28372e-06	ZC3HAV1	zinc finger CCCH-type containing, antiviral 1 [Source:HGNC Symbol;Acc:HGNC:23721]	11810.3	14009.7	10513.8	13449.6	10917.9	14556.8	zinc finger CCCH-type containing, antiviral 1 [Source:HGNC Symbol;Acc:HGNC:23721]
ENSG00000075415	5834.83	-0.297302	0.0579104	-5.13382	2.83918e-07	4.28372e-06	SLC25A3	solute carrier family 25 member 3 [Source:HGNC Symbol;Acc:HGNC:10989]	6201.21	5240.18	6455.6	5262.67	6671.52	5177.81	solute carrier family 25 member 3 [Source:HGNC Symbol;Acc:HGNC:10989]
ENSG00000140564	2314.48	0.484662	0.0944492	5.13146	2.87508e-07	4.32965e-06	FURIN	furin, paired basic amino acid cleaving enzyme [Source:HGNC Symbol;Acc:HGNC:8568]	2133.27	2447.09	1895.73	2972.08	1714.14	2724.55	furin, paired basic amino acid cleaving enzyme [Source:HGNC Symbol;Acc:HGNC:8568]
ENSG00000258581	40.0375	-1.22652	0.239271	-5.12609	2.95823e-07	4.45054e-06	RP11-638I2.10		70.6627	17.9581	59.8136	21.6524	57.2192	12.9187
ENSG00000138018	1415.42	-0.412786	0.0805424	-5.12507	2.97425e-07	4.46598e-06	EPT1	selenoprotein I [Source:HGNC Symbol;Acc:HGNC:29361]	1605.9	1316.93	1670.51	1156.69	1587.53	1154.93	selenoprotein I [Source:HGNC Symbol;Acc:HGNC:29361]
ENSG00000197136	2092.87	0.410401	0.080077	5.12508	2.97405e-07	4.46598e-06	PCNXL3	pecanex homolog 3 (Drosophila) [Source:HGNC Symbol;Acc:HGNC:18760]	1879.63	2278.29	1867.04	2494.58	1616.75	2420.96	pecanex homolog 3 (Drosophila) [Source:HGNC Symbol;Acc:HGNC:18760]
ENSG00000159388	647.198	0.600721	0.117237	5.124	2.99119e-07	4.48708e-06	BTG2	BTG anti-proliferation factor 2 [Source:HGNC Symbol;Acc:HGNC:1131]	585.385	762.621	493.157	875.213	439.492	727.322	BTG anti-proliferation factor 2 [Source:HGNC Symbol;Acc:HGNC:1131]
ENSG00000117385	3114.9	0.342158	0.0667976	5.1223	3.0183e-07	4.52336e-06	P3H1	prolyl 3-hydroxylase 1 [Source:HGNC Symbol;Acc:HGNC:19316]	2813.86	3431.2	2777.67	3672.93	2628.43	3365.32	prolyl 3-hydroxylase 1 [Source:HGNC Symbol;Acc:HGNC:19316]
ENSG00000146830	1777.38	0.398539	0.0779175	5.11488	3.1394e-07	4.70031e-06	GIGYF1	GRB10 interacting GYF protein 1 [Source:HGNC Symbol;Acc:HGNC:9126]	1594	2011.31	1592.38	1988.6	1390.31	2087.66	GRB10 interacting GYF protein 1 [Source:HGNC Symbol;Acc:HGNC:9126]
ENSG00000100401	7889.94	-0.349107	0.068357	-5.10711	3.27131e-07	4.89308e-06	RANGAP1	Ran GTPase activating protein 1 [Source:HGNC Symbol;Acc:HGNC:9854]	9551.37	6875.56	8814.57	7089.45	8201.83	6806.86	Ran GTPase activating protein 1 [Source:HGNC Symbol;Acc:HGNC:9854]
ENSG00000168769	962.958	-0.467771	0.0916351	-5.10471	3.31297e-07	4.95062e-06	TET2	tet methylcytosine dioxygenase 2 [Source:HGNC Symbol;Acc:HGNC:25941]	1115.73	884.737	1133.41	720.227	1118.82	804.834	tet methylcytosine dioxygenase 2 [Source:HGNC Symbol;Acc:HGNC:25941]
ENSG00000145390	1339.73	-0.582132	0.114121	-5.10099	3.37888e-07	5.04425e-06	USP53	ubiquitin specific peptidase 53 [Source:HGNC Symbol;Acc:HGNC:29255]	1589.54	1215.17	1873.14	1021.08	1396.39	943.064	ubiquitin specific peptidase 53 [Source:HGNC Symbol;Acc:HGNC:29255]
ENSG00000111266	683.882	-0.528548	0.103714	-5.09621	3.46517e-07	5.1681e-06	DUSP16	dual specificity phosphatase 16 [Source:HGNC Symbol;Acc:HGNC:17909]	845.721	603.393	857.532	556.125	734.11	506.413	dual specificity phosphatase 16 [Source:HGNC Symbol;Acc:HGNC:17909]
ENSG00000136560	1210.94	-0.412107	0.0808812	-5.09521	3.48351e-07	5.19046e-06	TANK	TRAF family member associated NFKB activator [Source:HGNC Symbol;Acc:HGNC:11562]	1374.58	1107.42	1375.1	964.101	1412.22	1032.2	TRAF family member associated NFKB activator [Source:HGNC Symbol;Acc:HGNC:11562]
ENSG00000138944	438.765	0.541001	0.106198	5.09425	3.50116e-07	5.21175e-06	KIAA1644	KIAA1644 [Source:HGNC Symbol;Acc:HGNC:29335]	347.363	530.363	350.337	488.888	364.012	551.628	KIAA1644 [Source:HGNC Symbol;Acc:HGNC:29335]
ENSG00000172159	63.9928	-1.12782	0.221675	-5.0877	3.62433e-07	5.38993e-06	FRMD3	FERM domain containing 3 [Source:HGNC Symbol;Acc:HGNC:24125]	75.1256	37.1134	90.3308	28.49	119.308	33.5886	FERM domain containing 3 [Source:HGNC Symbol;Acc:HGNC:24125]
ENSG00000261115	183.679	-0.84452	0.166045	-5.0861	3.65503e-07	5.42518e-06	TMEM178B	transmembrane protein 178B [Source:HGNC Symbol;Acc:HGNC:44112]	210.5	129.298	217.282	124.216	301.923	118.852	transmembrane protein 178B [Source:HGNC Symbol;Acc:HGNC:44112]
ENSG00000103260	420.419	0.713447	0.140271	5.0862	3.65314e-07	5.42518e-06	METRN	meteorin, glial cell differentiation regulator [Source:HGNC Symbol;Acc:HGNC:14151]	327.28	432.192	322.261	652.991	278.792	508.996	meteorin, glial cell differentiation regulator [Source:HGNC Symbol;Acc:HGNC:14151]
ENSG00000125827	2055.39	0.407368	0.0801096	5.08513	3.67382e-07	5.44786e-06	TMX4	thioredoxin related transmembrane protein 4 [Source:HGNC Symbol;Acc:HGNC:25237]	1884.09	2351.32	1787.69	2468.37	1603.36	2237.52	thioredoxin related transmembrane protein 4 [Source:HGNC Symbol;Acc:HGNC:25237]
ENSG00000133612	1624.6	0.438839	0.0863629	5.08133	3.74801e-07	5.55257e-06	AGAP3	ArfGAP with GTPase domain, ankyrin repeat and PH domain 3 [Source:HGNC Symbol;Acc:HGNC:16923]	1460.86	1682.08	1328.72	1994.3	1325.78	1955.89	ArfGAP with GTPase domain, ankyrin repeat and PH domain 3 [Source:HGNC Symbol;Acc:HGNC:16923]
ENSG00000006576	995.125	-0.564544	0.111165	-5.07845	3.80533e-07	5.63211e-06	PHTF2	putative homeodomain transcription factor 2 [Source:HGNC Symbol;Acc:HGNC:13411]	1028.7	895.511	1334.21	747.577	1228.39	736.365	putative homeodomain transcription factor 2 [Source:HGNC Symbol;Acc:HGNC:13411]
ENSG00000140396	2298.53	-0.386722	0.0761765	-5.07665	3.84138e-07	5.68005e-06	NCOA2	nuclear receptor coactivator 2 [Source:HGNC Symbol;Acc:HGNC:7669]	2624.19	2151.38	2562.22	1819.94	2649.13	1984.31	nuclear receptor coactivator 2 [Source:HGNC Symbol;Acc:HGNC:7669]
ENSG00000115677	11566.9	0.31904	0.0628492	5.07628	3.84906e-07	5.68597e-06	HDLBP	high density lipoprotein binding protein [Source:HGNC Symbol;Acc:HGNC:4857]	10714.7	12764.6	10585.8	12945.9	9513	12877.4	high density lipoprotein binding protein [Source:HGNC Symbol;Acc:HGNC:4857]
ENSG00000164916	1974.27	0.383447	0.0755442	5.07579	3.85891e-07	5.69511e-06	FOXK1	forkhead box K1 [Source:HGNC Symbol;Acc:HGNC:23480]	1789.63	2274.69	1573.46	2177.78	1762.84	2267.23	forkhead box K1 [Source:HGNC Symbol;Acc:HGNC:23480]
ENSG00000153786	2173.66	0.325752	0.0642363	5.07115	3.95418e-07	5.83016e-06	ZDHHC7	zinc finger DHHC-type containing 7 [Source:HGNC Symbol;Acc:HGNC:18459]	1907.89	2419.56	1919.53	2474.07	1950.32	2370.58	zinc finger DHHC-type containing 7 [Source:HGNC Symbol;Acc:HGNC:18459]
ENSG00000134901	369.453	0.582604	0.114911	5.07005	3.97719e-07	5.85852e-06	KDELC1	KDEL motif containing 1 [Source:HGNC Symbol;Acc:HGNC:19350]	294.552	404.656	285.64	468.375	295.836	467.657	KDEL motif containing 1 [Source:HGNC Symbol;Acc:HGNC:19350]
ENSG00000185722	5009.85	-0.324014	0.0639159	-5.06938	3.99111e-07	5.87344e-06	ANKFY1	ankyrin repeat and FYVE domain containing 1 [Source:HGNC Symbol;Acc:HGNC:20763]	5730.37	4599.67	5488.81	4166.38	5516.18	4557.71	ankyrin repeat and FYVE domain containing 1 [Source:HGNC Symbol;Acc:HGNC:20763]
ENSG00000136485	3718.54	0.301453	0.0595779	5.05981	4.19675e-07	6.17021e-06	DCAF7	DDB1 and CUL4 associated factor 7 [Source:HGNC Symbol;Acc:HGNC:30915]	3373.21	3984.31	3339.19	4167.52	3263.93	4183.07	DDB1 and CUL4 associated factor 7 [Source:HGNC Symbol;Acc:HGNC:30915]
ENSG00000105711	256.843	0.660109	0.13053	5.05715	4.25565e-07	6.25089e-06	SCN1B	sodium voltage-gated channel beta subunit 1 [Source:HGNC Symbol;Acc:HGNC:10586]	197.112	322.049	200.803	344.159	186.267	290.671	sodium voltage-gated channel beta subunit 1 [Source:HGNC Symbol;Acc:HGNC:10586]
ENSG00000104973	1458.47	-0.39369	0.0778954	-5.05409	4.32444e-07	6.34592e-06	MED25	mediator complex subunit 25 [Source:HGNC Symbol;Acc:HGNC:28845]	1753.18	1253.48	1644.26	1203.42	1582.66	1313.83	mediator complex subunit 25 [Source:HGNC Symbol;Acc:HGNC:28845]
ENSG00000166741	2123.37	-0.487319	0.0964341	-5.05339	4.34045e-07	6.35739e-06	NNMT	nicotinamide N-methyltransferase [Source:HGNC Symbol;Acc:HGNC:7861]	2333.36	1864.05	2272.31	1615.95	2874.35	1780.2	nicotinamide N-methyltransferase [Source:HGNC Symbol;Acc:HGNC:7861]
ENSG00000064961	1141.83	0.410315	0.081195	5.05346	4.33888e-07	6.35739e-06	HMG20B	high mobility group 20B [Source:HGNC Symbol;Acc:HGNC:5002]	1021.26	1281.01	994.859	1353.84	909.42	1290.58	high mobility group 20B [Source:HGNC Symbol;Acc:HGNC:5002]
ENSG00000104131	972.11	-0.432986	0.0856882	-5.05304	4.34829e-07	6.36286e-06	EIF3J	eukaryotic translation initiation factor 3 subunit J [Source:HGNC Symbol;Acc:HGNC:3270]	1117.96	833.257	1192.61	802.278	1049.42	837.131	eukaryotic translation initiation factor 3 subunit J [Source:HGNC Symbol;Acc:HGNC:3270]
ENSG00000143079	1610.83	-0.388902	0.0769736	-5.05241	4.36274e-07	6.37553e-06	CTTNBP2NL	CTTNBP2 N-terminal like [Source:HGNC Symbol;Acc:HGNC:25330]	1831.28	1433.06	1811.5	1276.35	1851.71	1461.1	CTTNBP2 N-terminal like [Source:HGNC Symbol;Acc:HGNC:25330]
ENSG00000079308	834.491	-0.518634	0.102653	-5.0523	4.36517e-07	6.37553e-06	TNS1	tensin 1 [Source:HGNC Symbol;Acc:HGNC:11973]	1065.89	706.353	919.787	596.011	981.249	737.657	tensin 1 [Source:HGNC Symbol;Acc:HGNC:11973]
ENSG00000112977	3197.69	0.354622	0.0701931	5.05209	4.37e-07	6.37658e-06	DAP	death associated protein [Source:HGNC Symbol;Acc:HGNC:2672]	2854.03	3431.2	2871.66	3841.59	2668.61	3519.05	death associated protein [Source:HGNC Symbol;Acc:HGNC:2672]
ENSG00000267102	116.704	-0.907039	0.179622	-5.04971	4.42476e-07	6.45042e-06	RP11-686D22.7		145.788	81.4101	181.882	75.2136	144.874	71.0528
ENSG00000130813	2938.39	-0.364218	0.072162	-5.04723	4.48266e-07	6.52868e-06	C19orf66	chromosome 19 open reading frame 66 [Source:HGNC Symbol;Acc:HGNC:25649]	3540.57	2625.48	3329.42	2501.42	3070.36	2563.07	chromosome 19 open reading frame 66 [Source:HGNC Symbol;Acc:HGNC:25649]
ENSG00000158747	363.069	0.585712	0.116096	5.04508	4.53321e-07	6.59612e-06	NBL1	neuroblastoma 1, DAN family BMP antagonist [Source:HGNC Symbol;Acc:HGNC:7650]	296.783	399.867	283.809	450.142	277.574	470.24	neuroblastoma 1, DAN family BMP antagonist [Source:HGNC Symbol;Acc:HGNC:7650]
ENSG00000171703	492.599	0.533932	0.105897	5.04199	4.60726e-07	6.69758e-06	TCEA2	transcription elongation factor A2 [Source:HGNC Symbol;Acc:HGNC:11614]	427.695	554.307	372.309	616.523	395.665	589.092	transcription elongation factor A2 [Source:HGNC Symbol;Acc:HGNC:11614]
ENSG00000165355	420.255	-0.545413	0.108261	-5.03795	4.70556e-07	6.83408e-06	FBXO33	F-box protein 33 [Source:HGNC Symbol;Acc:HGNC:19833]	476.043	329.232	526.116	346.438	505.234	338.47	F-box protein 33 [Source:HGNC Symbol;Acc:HGNC:19833]
ENSG00000124523	264.708	0.683185	0.135642	5.03669	4.73654e-07	6.87263e-06	SIRT5	sirtuin 5 [Source:HGNC Symbol;Acc:HGNC:14933]	197.856	313.668	175.779	319.088	224.007	357.848	sirtuin 5 [Source:HGNC Symbol;Acc:HGNC:14933]
ENSG00000103647	176.293	0.795503	0.157975	5.03564	4.76258e-07	6.90396e-06	CORO2B	coronin 2B [Source:HGNC Symbol;Acc:HGNC:2256]	145.788	210.709	116.575	245.014	107.134	232.536	coronin 2B [Source:HGNC Symbol;Acc:HGNC:2256]
ENSG00000119280	3001.4	-0.307945	0.0611651	-5.03465	4.78721e-07	6.93063e-06	C1orf198	chromosome 1 open reading frame 198 [Source:HGNC Symbol;Acc:HGNC:25900]	3331.56	2744	3381.91	2655.27	3260.28	2635.41	chromosome 1 open reading frame 198 [Source:HGNC Symbol;Acc:HGNC:25900]
ENSG00000134001	2132.68	-0.351688	0.069855	-5.03454	4.78992e-07	6.93063e-06	EIF2S1	eukaryotic translation initiation factor 2 subunit alpha [Source:HGNC Symbol;Acc:HGNC:3265]	2271.62	1926.31	2463.95	1851.85	2454.34	1827.99	eukaryotic translation initiation factor 2 subunit alpha [Source:HGNC Symbol;Acc:HGNC:3265]
ENSG00000115947	689.172	-0.510329	0.101389	-5.0334	4.8185e-07	6.9655e-06	ORC4	origin recognition complex subunit 4 [Source:HGNC Symbol;Acc:HGNC:8490]	777.29	589.026	766.591	526.495	903.333	572.298	origin recognition complex subunit 4 [Source:HGNC Symbol;Acc:HGNC:8490]
ENSG00000073712	3773.58	-0.367289	0.0730061	-5.03094	4.88092e-07	7.04916e-06	FERMT2	fermitin family member 2 [Source:HGNC Symbol;Acc:HGNC:15767]	4183.23	3487.47	4442.69	3005.12	4155.09	3367.9	fermitin family member 2 [Source:HGNC Symbol;Acc:HGNC:15767]
ENSG00000196639	1436.23	-0.428295	0.0851756	-5.02838	4.9463e-07	7.13554e-06	HRH1	histamine receptor H1 [Source:HGNC Symbol;Acc:HGNC:5182]	1568.71	1306.15	1622.9	1123.65	1772.58	1223.4	histamine receptor H1 [Source:HGNC Symbol;Acc:HGNC:5182]
ENSG00000184545	94.9817	-1.03571	0.205978	-5.02824	4.94993e-07	7.13554e-06	DUSP8	dual specificity phosphatase 8 [Source:HGNC Symbol;Acc:HGNC:3074]	165.128	71.8325	120.848	50.1424	119.308	42.6317	dual specificity phosphatase 8 [Source:HGNC Symbol;Acc:HGNC:3074]
ENSG00000198712	20011.1	0.355945	0.0707969	5.02769	4.96411e-07	7.14934e-06	MT-CO2	mitochondrially encoded cytochrome c oxidase II [Source:HGNC Symbol;Acc:HGNC:7421]	18159.6	21343.8	16083.1	23941.9	18283.4	22255	mitochondrially encoded cytochrome c oxidase II [Source:HGNC Symbol;Acc:HGNC:7421]
ENSG00000090615	2807.94	0.429775	0.0854904	5.02717	4.97771e-07	7.16227e-06	GOLGA3	golgin A3 [Source:HGNC Symbol;Acc:HGNC:4426]	2476.91	3225.28	2597.62	3198.86	2059.89	3289.1	golgin A3 [Source:HGNC Symbol;Acc:HGNC:4426]
ENSG00000158985	772.102	-0.464734	0.092469	-5.02583	5.01248e-07	7.20562e-06	CDC42SE2	CDC42 small effector 2 [Source:HGNC Symbol;Acc:HGNC:18547]	839.027	657.267	892.932	624.501	969.074	649.81	CDC42 small effector 2 [Source:HGNC Symbol;Acc:HGNC:18547]
ENSG00000093144	1387.14	-0.452344	0.09003	-5.02437	5.05094e-07	7.25418e-06	ECHDC1	ethylmalonyl-CoA decarboxylase 1 [Source:HGNC Symbol;Acc:HGNC:21489]	1480.2	1272.63	1615.58	1090.6	1736.06	1127.8	ethylmalonyl-CoA decarboxylase 1 [Source:HGNC Symbol;Acc:HGNC:21489]
ENSG00000129250	2905.94	0.418646	0.0833401	5.02335	5.07791e-07	7.28616e-06	KIF1C	kinesin family member 1C [Source:HGNC Symbol;Acc:HGNC:6317]	2713.45	3177.39	2489.59	3544.16	2219.38	3291.68	kinesin family member 1C [Source:HGNC Symbol;Acc:HGNC:6317]
ENSG00000075790	1036.11	-0.426812	0.0850046	-5.02105	5.13906e-07	7.36709e-06	BCAP29	B-cell receptor associated protein 29 [Source:HGNC Symbol;Acc:HGNC:24131]	1118.7	888.328	1177.96	884.329	1284.39	862.969	B-cell receptor associated protein 29 [Source:HGNC Symbol;Acc:HGNC:24131]
ENSG00000164307	2696.6	-0.420511	0.0837548	-5.02074	5.14732e-07	7.37212e-06	ERAP1	endoplasmic reticulum aminopeptidase 1 [Source:HGNC Symbol;Acc:HGNC:18173]	2980.48	2489	3016.31	2043.3	3298.02	2352.49	endoplasmic reticulum aminopeptidase 1 [Source:HGNC Symbol;Acc:HGNC:18173]
ENSG00000109320	2056.13	-0.368274	0.0733719	-5.01928	5.18656e-07	7.42148e-06	NFKB1	nuclear factor kappa B subunit 1 [Source:HGNC Symbol;Acc:HGNC:7794]	2395.09	1734.75	2190.52	1750.43	2383.73	1882.25	nuclear factor kappa B subunit 1 [Source:HGNC Symbol;Acc:HGNC:7794]
ENSG00000203879	2462.99	0.381462	0.0760615	5.01518	5.29837e-07	7.57447e-06	GDI1	GDP dissociation inhibitor 1 [Source:HGNC Symbol;Acc:HGNC:4226]	2283.52	2657.8	2112.4	2952.7	1996.59	2774.93	GDP dissociation inhibitor 1 [Source:HGNC Symbol;Acc:HGNC:4226]
ENSG00000170004	2706.07	0.426765	0.0850982	5.01497	5.30428e-07	7.57594e-06	CHD3	chromodomain helicase DNA binding protein 3 [Source:HGNC Symbol;Acc:HGNC:1918]	2502.2	3189.36	2371.79	2970.94	2011.19	3190.92	chromodomain helicase DNA binding protein 3 [Source:HGNC Symbol;Acc:HGNC:1918]
ENSG00000197448	1882.66	-0.340963	0.0680062	-5.0137	5.33931e-07	7.61896e-06	GSTK1	glutathione S-transferase kappa 1 [Source:HGNC Symbol;Acc:HGNC:16906]	2153.35	1662.92	2028.78	1654.7	2143.89	1652.3	glutathione S-transferase kappa 1 [Source:HGNC Symbol;Acc:HGNC:16906]
ENSG00000121274	616.816	-0.477062	0.0951732	-5.01257	5.37089e-07	7.64994e-06	PAPD5	poly(A) RNA polymerase D5, non-canonical [Source:HGNC Symbol;Acc:HGNC:30758]	716.297	536.349	695.181	495.726	754.807	502.537	poly(A) RNA polymerase D5, non-canonical [Source:HGNC Symbol;Acc:HGNC:30758]
ENSG00000118680	4931.92	-0.393333	0.078467	-5.01272	5.36668e-07	7.64994e-06	MYL12B	myosin light chain 12B [Source:HGNC Symbol;Acc:HGNC:29827]	5226.81	4405.72	5362.47	4077.49	6264.9	4254.12	myosin light chain 12B [Source:HGNC Symbol;Acc:HGNC:29827]
ENSG00000013288	2567.02	-0.325659	0.0649881	-5.01105	5.41334e-07	7.70333e-06	MAN2B2	mannosidase alpha class 2B member 2 [Source:HGNC Symbol;Acc:HGNC:29623]	2974.53	2269.91	2853.35	2259.83	2750.17	2294.36	mannosidase alpha class 2B member 2 [Source:HGNC Symbol;Acc:HGNC:29623]
ENSG00000062598	2518.7	-0.368298	0.0735074	-5.01035	5.43312e-07	7.72439e-06	ELMO2	engulfment and cell motility 2 [Source:HGNC Symbol;Acc:HGNC:17233]	2861.47	2248.36	2703.21	2042.16	2972.96	2284.02	engulfment and cell motility 2 [Source:HGNC Symbol;Acc:HGNC:17233]
ENSG00000234290	165.7	-0.850815	0.169852	-5.00915	5.46711e-07	7.76561e-06	AC116366.6		222.402	130.496	229.489	82.0512	205.746	124.019
ENSG00000115318	333.07	0.598486	0.119492	5.00859	5.4831e-07	7.78119e-06	LOXL3	lysyl oxidase like 3 [Source:HGNC Symbol;Acc:HGNC:13869]	258.849	367.543	268.551	413.675	254.443	435.36	lysyl oxidase like 3 [Source:HGNC Symbol;Acc:HGNC:13869]
ENSG00000143842	299.17	0.722086	0.144253	5.00568	5.56638e-07	7.89215e-06	SOX13	SRY-box 13 [Source:HGNC Symbol;Acc:HGNC:11192]	228.352	314.866	220.944	360.114	206.963	463.781	SRY-box 13 [Source:HGNC Symbol;Acc:HGNC:11192]
ENSG00000104368	11236.2	0.93828	0.187454	5.00538	5.57518e-07	7.89741e-06	PLAT	plasminogen activator, tissue type [Source:HGNC Symbol;Acc:HGNC:9051]	8480.27	12010.4	6775.42	18092.3	6037.24	16021.8	plasminogen activator, tissue type [Source:HGNC Symbol;Acc:HGNC:9051]
ENSG00000163935	233.154	-0.715803	0.14308	-5.00282	5.64981e-07	7.99583e-06	SFMBT1	Scm-like with four mbt domains 1 [Source:HGNC Symbol;Acc:HGNC:20255]	278.932	192.75	289.303	175.498	317.749	144.689	Scm-like with four mbt domains 1 [Source:HGNC Symbol;Acc:HGNC:20255]
ENSG00000151718	1546.29	-0.393402	0.0786426	-5.0024	5.66219e-07	8.00603e-06	WWC2	WW and C2 domain containing 2 [Source:HGNC Symbol;Acc:HGNC:24148]	1704.09	1441.44	1800.51	1293.45	1778.67	1259.57	WW and C2 domain containing 2 [Source:HGNC Symbol;Acc:HGNC:24148]
ENSG00000184939	457.435	0.58963	0.117897	5.00122	5.69701e-07	8.04793e-06	ZFP90	ZFP90 zinc finger protein [Source:HGNC Symbol;Acc:HGNC:23329]	339.925	544.73	336.299	505.982	406.622	611.054	ZFP90 zinc finger protein [Source:HGNC Symbol;Acc:HGNC:23329]
ENSG00000097021	1921.15	-0.432236	0.086454	-4.99961	5.74478e-07	8.10804e-06	ACOT7	acyl-CoA thioesterase 7 [Source:HGNC Symbol;Acc:HGNC:24157]	2148.15	1534.82	2061.74	1756.12	2440.95	1585.12	acyl-CoA thioesterase 7 [Source:HGNC Symbol;Acc:HGNC:24157]
ENSG00000174233	1555.04	0.487631	0.0975435	4.99911	5.7596e-07	8.12156e-06	ADCY6	adenylate cyclase 6 [Source:HGNC Symbol;Acc:HGNC:237]	1388.71	1709.61	1342.14	1750.43	1117.6	2021.78	adenylate cyclase 6 [Source:HGNC Symbol;Acc:HGNC:237]
ENSG00000107819	1997.37	0.361027	0.0723171	4.99228	5.96706e-07	8.40646e-06	SFXN3	sideroflexin 3 [Source:HGNC Symbol;Acc:HGNC:16087]	1747.23	2198.07	1811.5	2181.19	1667.88	2378.33	sideroflexin 3 [Source:HGNC Symbol;Acc:HGNC:16087]
ENSG00000110811	2301.72	0.469957	0.0941746	4.99027	6.02956e-07	8.48679e-06	P3H3	prolyl 3-hydroxylase 3 [Source:HGNC Symbol;Acc:HGNC:19318]	2106.49	2475.83	1971.41	2928.77	1667.88	2659.96	prolyl 3-hydroxylase 3 [Source:HGNC Symbol;Acc:HGNC:19318]
ENSG00000177570	589.088	0.510891	0.102401	4.98912	6.06564e-07	8.52984e-06	SAMD12	sterile alpha motif domain containing 12 [Source:HGNC Symbol;Acc:HGNC:31750]	473.812	748.255	518.791	689.458	449.232	654.978	sterile alpha motif domain containing 12 [Source:HGNC Symbol;Acc:HGNC:31750]
ENSG00000168811	201.514	-0.70576	0.141547	-4.98603	6.16331e-07	8.65933e-06	IL12A	interleukin 12A [Source:HGNC Symbol;Acc:HGNC:5969]	253.642	136.482	252.682	150.427	255.66	160.192	interleukin 12A [Source:HGNC Symbol;Acc:HGNC:5969]
ENSG00000131584	1594.15	0.470852	0.0944429	4.98558	6.17775e-07	8.67177e-06	ACAP3	ArfGAP with coiled-coil, ankyrin repeat and PH domains 3 [Source:HGNC Symbol;Acc:HGNC:16754]	1413.25	1855.67	1434.31	1937.32	1127.34	1796.99	ArfGAP with coiled-coil, ankyrin repeat and PH domains 3 [Source:HGNC Symbol;Acc:HGNC:16754]
ENSG00000134470	2219.5	-0.404008	0.0810511	-4.98462	6.20847e-07	8.70701e-06	IL15RA	interleukin 15 receptor subunit alpha [Source:HGNC Symbol;Acc:HGNC:5978]	2668.82	1825.74	2295.5	2004.56	2647.91	1874.5	interleukin 15 receptor subunit alpha [Source:HGNC Symbol;Acc:HGNC:5978]
ENSG00000114796	606.257	0.559579	0.112309	4.98249	6.27726e-07	8.79553e-06	KLHL24	kelch like family member 24 [Source:HGNC Symbol;Acc:HGNC:25947]	454.473	766.213	490.716	618.803	507.668	799.667	kelch like family member 24 [Source:HGNC Symbol;Acc:HGNC:25947]
ENSG00000253522	204.832	-1.27276	0.255504	-4.98137	6.31359e-07	8.83845e-06	CTC-231O11.1	MIR3142 host gene [Source:HGNC Symbol;Acc:HGNC:51944]	439.596	63.452	432.733	72.9344	158.266	62.0097	MIR3142 host gene [Source:HGNC Symbol;Acc:HGNC:51944]
ENSG00000137575	5470.17	-0.311977	0.0626366	-4.98075	6.3337e-07	8.85862e-06	SDCBP	syndecan binding protein [Source:HGNC Symbol;Acc:HGNC:10662]	5812.94	4888.2	5953.28	4910.54	6443.86	4812.21	syndecan binding protein [Source:HGNC Symbol;Acc:HGNC:10662]
ENSG00000171408	80.7496	0.97972	0.196773	4.97894	6.3932e-07	8.93378e-06	PDE7B	phosphodiesterase 7B [Source:HGNC Symbol;Acc:HGNC:8792]	53.5549	96.9738	45.1654	117.379	48.6972	122.728	phosphodiesterase 7B [Source:HGNC Symbol;Acc:HGNC:8792]
ENSG00000117280	1168.84	-0.435097	0.0874156	-4.97734	6.44625e-07	8.9998e-06	RAB29	RAB29, member RAS oncogene family [Source:HGNC Symbol;Acc:HGNC:9789]	1256.31	997.274	1318.34	942.449	1475.53	1023.16	RAB29, member RAS oncogene family [Source:HGNC Symbol;Acc:HGNC:9789]
ENSG00000112763	2448.9	-0.336779	0.0676653	-4.97713	6.4533e-07	9.00154e-06	BTN2A1	butyrophilin subfamily 2 member A1 [Source:HGNC Symbol;Acc:HGNC:1136]	2888.25	2154.97	2634.24	2182.33	2692.96	2140.63	butyrophilin subfamily 2 member A1 [Source:HGNC Symbol;Acc:HGNC:1136]
ENSG00000119812	1353.54	0.388356	0.078053	4.97554	6.50671e-07	9.06788e-06	FAM98A	family with sequence similarity 98 member A [Source:HGNC Symbol;Acc:HGNC:24520]	1159.61	1514.47	1243.27	1546.44	1096.9	1560.58	family with sequence similarity 98 member A [Source:HGNC Symbol;Acc:HGNC:24520]
ENSG00000099381	779.612	0.476595	0.0958064	4.97457	6.53929e-07	9.10511e-06	SETD1A	SET domain containing 1A [Source:HGNC Symbol;Acc:HGNC:29010]	705.883	906.286	656.119	925.355	575.844	908.184	SET domain containing 1A [Source:HGNC Symbol;Acc:HGNC:29010]
ENSG00000082781	4186.64	0.359678	0.0724171	4.96676	6.80818e-07	9.46907e-06	ITGB5	integrin subunit beta 5 [Source:HGNC Symbol;Acc:HGNC:6160]	3853.72	4441.64	3531.44	5090.59	3585.33	4617.14	integrin subunit beta 5 [Source:HGNC Symbol;Acc:HGNC:6160]
ENSG00000196083	219.021	-0.687064	0.138336	-4.96662	6.8129e-07	9.46907e-06	IL1RAP	interleukin 1 receptor accessory protein [Source:HGNC Symbol;Acc:HGNC:5995]	257.361	162.82	275.875	172.08	290.966	155.024	interleukin 1 receptor accessory protein [Source:HGNC Symbol;Acc:HGNC:5995]
ENSG00000112378	4102.09	0.331081	0.0667088	4.96308	6.93829e-07	9.63472e-06	PERP	PERP, TP53 apoptosis effector [Source:HGNC Symbol;Acc:HGNC:17637]	3478.84	4554.18	3539.38	4738.46	3864.12	4437.57	PERP, TP53 apoptosis effector [Source:HGNC Symbol;Acc:HGNC:17637]
ENSG00000238227	699.95	0.550383	0.110964	4.96003	7.04837e-07	9.77883e-06	C9orf69	chromosome 9 open reading frame 69 [Source:HGNC Symbol;Acc:HGNC:31009]	594.311	778.185	590.202	956.124	496.712	784.165	chromosome 9 open reading frame 69 [Source:HGNC Symbol;Acc:HGNC:31009]
ENSG00000170525	2393.55	0.413147	0.0833696	4.95561	7.21032e-07	9.99458e-06	PFKFB3	6-phosphofructo-2-kinase/fructose-2,6-biphosphatase 3 [Source:HGNC Symbol;Acc:HGNC:8874]	2290.22	2704.49	1903.05	2852.42	1936.93	2674.17	6-phosphofructo-2-kinase/fructose-2,6-biphosphatase 3 [Source:HGNC Symbol;Acc:HGNC:8874]
ENSG00000127325	68.5373	-1.06239	0.214395	-4.95531	7.22154e-07	1.00012e-05	BEST3	bestrophin 3 [Source:HGNC Symbol;Acc:HGNC:17105]	92.2334	35.9162	105.589	28.49	98.6118	50.3829	bestrophin 3 [Source:HGNC Symbol;Acc:HGNC:17105]
ENSG00000111664	67.5265	1.0279	0.207515	4.95339	7.29328e-07	1.00915e-05	GNB3	G protein subunit beta 3 [Source:HGNC Symbol;Acc:HGNC:4400]	31.9842	101.763	40.893	91.168	45.0449	94.3064	G protein subunit beta 3 [Source:HGNC Symbol;Acc:HGNC:4400]
ENSG00000198833	1266.17	-0.401006	0.0809602	-4.95313	7.30304e-07	1.0096e-05	UBE2J1	ubiquitin conjugating enzyme E2 J1 [Source:HGNC Symbol;Acc:HGNC:17598]	1379.78	1163.69	1470.32	1052.99	1487.7	1042.54	ubiquitin conjugating enzyme E2 J1 [Source:HGNC Symbol;Acc:HGNC:17598]
ENSG00000118257	5300.25	-0.349659	0.070605	-4.95232	7.33327e-07	1.01288e-05	NRP2	neuropilin 2 [Source:HGNC Symbol;Acc:HGNC:8005]	6235.43	4768.48	5467.45	4447.86	6155.33	4726.95	neuropilin 2 [Source:HGNC Symbol;Acc:HGNC:8005]
ENSG00000197837	71.6095	1.01597	0.205236	4.95027	7.41113e-07	1.02272e-05	HIST4H4	histone cluster 4 H4 [Source:HGNC Symbol;Acc:HGNC:20510]	41.6538	114.932	36.6206	93.4472	48.6972	94.3064	histone cluster 4 H4 [Source:HGNC Symbol;Acc:HGNC:20510]
ENSG00000146122	473.012	0.526402	0.106375	4.94855	7.47695e-07	1.03089e-05	DAAM2	dishevelled associated activator of morphogenesis 2 [Source:HGNC Symbol;Acc:HGNC:18143]	406.125	560.293	394.892	545.868	346.968	583.925	dishevelled associated activator of morphogenesis 2 [Source:HGNC Symbol;Acc:HGNC:18143]
ENSG00000106565	1478.99	-0.492363	0.0995655	-4.94512	7.60975e-07	1.04827e-05	TMEM176B	transmembrane protein 176B [Source:HGNC Symbol;Acc:HGNC:29596]	1692.93	1139.74	1567.97	1156.69	1958.85	1357.75	transmembrane protein 176B [Source:HGNC Symbol;Acc:HGNC:29596]
ENSG00000174953	1524.44	-0.416752	0.08428	-4.94485	7.62016e-07	1.04877e-05	DHX36	DEAH-box helicase 36 [Source:HGNC Symbol;Acc:HGNC:14410]	1724.17	1383.97	1857.27	1186.32	1663.01	1331.92	DEAH-box helicase 36 [Source:HGNC Symbol;Acc:HGNC:14410]
ENSG00000004399	2158.13	0.353304	0.0714535	4.94453	7.63264e-07	1.04956e-05	PLXND1	plexin D1 [Source:HGNC Symbol;Acc:HGNC:9107]	1960.7	2356.11	1911.59	2552.7	1794.49	2373.16	plexin D1 [Source:HGNC Symbol;Acc:HGNC:9107]
ENSG00000148344	3184.92	-0.547135	0.110672	-4.94374	7.66373e-07	1.0529e-05	PTGES	prostaglandin E synthase [Source:HGNC Symbol;Acc:HGNC:9599]	4069.43	2152.58	3182.33	2711.11	4185.52	2808.52	prostaglandin E synthase [Source:HGNC Symbol;Acc:HGNC:9599]
ENSG00000166025	1581.61	0.357519	0.0723249	4.94323	7.6838e-07	1.05472e-05	AMOTL1	angiomotin like 1 [Source:HGNC Symbol;Acc:HGNC:17811]	1419.95	1737.15	1387.31	1747.01	1337.96	1860.29	angiomotin like 1 [Source:HGNC Symbol;Acc:HGNC:17811]
ENSG00000166225	989.708	-0.408996	0.0828071	-4.93914	7.84691e-07	1.07616e-05	FRS2	fibroblast growth factor receptor substrate 2 [Source:HGNC Symbol;Acc:HGNC:16971]	1112.01	894.314	1122.42	803.418	1165.08	841.007	fibroblast growth factor receptor substrate 2 [Source:HGNC Symbol;Acc:HGNC:16971]
ENSG00000137965	5858.79	-0.38198	0.0773669	-4.93725	7.92303e-07	1.08564e-05	IFI44	interferon induced protein 44 [Source:HGNC Symbol;Acc:HGNC:16938]	6541.88	5537.09	6898.71	4531.05	6501.08	5142.93	interferon induced protein 44 [Source:HGNC Symbol;Acc:HGNC:16938]
ENSG00000141279	2400.11	-0.41107	0.0833745	-4.93041	8.20583e-07	1.12339e-05	NPEPPS	aminopeptidase puromycin sensitive [Source:HGNC Symbol;Acc:HGNC:7900]	2703.78	2225.61	2694.05	1808.54	2850	2118.67	aminopeptidase puromycin sensitive [Source:HGNC Symbol;Acc:HGNC:7900]
ENSG00000125945	482.904	0.547378	0.111049	4.92914	8.25937e-07	1.12973e-05	ZNF436	zinc finger protein 436 [Source:HGNC Symbol;Acc:HGNC:20814]	348.107	623.745	402.826	548.147	413.926	560.671	zinc finger protein 436 [Source:HGNC Symbol;Acc:HGNC:20814]
ENSG00000160013	735.563	-0.529884	0.107538	-4.92744	8.33155e-07	1.1386e-05	PTGIR	prostaglandin I2 (prostacyclin) receptor (IP) [Source:HGNC Symbol;Acc:HGNC:9602]	959.525	574.66	916.125	629.059	747.502	586.509	prostaglandin I2 (prostacyclin) receptor (IP) [Source:HGNC Symbol;Acc:HGNC:9602]
ENSG00000107854	2433.4	-0.362423	0.0735597	-4.92693	8.35316e-07	1.13999e-05	TNKS2	tankyrase 2 [Source:HGNC Symbol;Acc:HGNC:15677]	2647.25	2207.65	2772.18	1953.27	2812.26	2207.8	tankyrase 2 [Source:HGNC Symbol;Acc:HGNC:15677]
ENSG00000105270	2153.49	0.363377	0.0737544	4.92685	8.35647e-07	1.13999e-05	CLIP3	CAP-Gly domain containing linker protein 3 [Source:HGNC Symbol;Acc:HGNC:24314]	1998.64	2483.01	1893.28	2423.93	1737.27	2384.79	CAP-Gly domain containing linker protein 3 [Source:HGNC Symbol;Acc:HGNC:24314]
ENSG00000183023	965.107	-0.494455	0.100478	-4.92104	8.60858e-07	1.17335e-05	SLC8A1	solute carrier family 8 member A1 [Source:HGNC Symbol;Acc:HGNC:11068]	1100.85	864.384	1110.82	678.062	1195.52	841.007	solute carrier family 8 member A1 [Source:HGNC Symbol;Acc:HGNC:11068]
ENSG00000250742	527.644	-0.528626	0.107485	-4.91815	8.73643e-07	1.18973e-05	RP11-834C11.4		659.767	386.698	585.929	433.048	637.933	462.489
ENSG00000143376	1673.6	-0.36979	0.0752055	-4.91707	8.78503e-07	1.1953e-05	SNX27	sorting nexin family member 27 [Source:HGNC Symbol;Acc:HGNC:20073]	1881.86	1552.78	1901.83	1357.26	1890.67	1457.23	sorting nexin family member 27 [Source:HGNC Symbol;Acc:HGNC:20073]
ENSG00000139174	134.162	-0.832015	0.169359	-4.91274	8.9811e-07	1.22043e-05	PRICKLE1	prickle planar cell polarity protein 1 [Source:HGNC Symbol;Acc:HGNC:17019]	180.004	92.185	155.637	94.5868	196.006	86.5552	prickle planar cell polarity protein 1 [Source:HGNC Symbol;Acc:HGNC:17019]
ENSG00000129353	5044.82	-0.293719	0.0597883	-4.91265	8.98542e-07	1.22043e-05	SLC44A2	solute carrier family 44 member 2 [Source:HGNC Symbol;Acc:HGNC:17292]	5380.04	4489.53	5573.65	4420.51	5738.97	4666.23	solute carrier family 44 member 2 [Source:HGNC Symbol;Acc:HGNC:17292]
ENSG00000198786	21874.2	0.304947	0.0620985	4.9107	9.07533e-07	1.23156e-05	MT-ND5	mitochondrially encoded NADH:ubiquinone oxidoreductase core subunit 5 [Source:HGNC Symbol;Acc:HGNC:7461]	20334.5	23707.1	18805.3	25680.9	19471.6	23245.9	mitochondrially encoded NADH:ubiquinone oxidoreductase core subunit 5 [Source:HGNC Symbol;Acc:HGNC:7461]
ENSG00000172164	638.864	0.451085	0.0918719	4.90993	9.11068e-07	1.23528e-05	SNTB1	syntrophin beta 1 [Source:HGNC Symbol;Acc:HGNC:11168]	542.987	703.958	528.557	761.253	538.104	758.327	syntrophin beta 1 [Source:HGNC Symbol;Acc:HGNC:11168]
ENSG00000137094	410.325	0.552891	0.112628	4.909	9.15407e-07	1.24008e-05	DNAJB5	DnaJ heat shock protein family (Hsp40) member B5 [Source:HGNC Symbol;Acc:HGNC:14887]	345.875	463.319	313.106	536.751	327.489	475.408	DnaJ heat shock protein family (Hsp40) member B5 [Source:HGNC Symbol;Acc:HGNC:14887]
ENSG00000135905	1755.38	-0.374382	0.0762995	-4.90674	9.26026e-07	1.25337e-05	DOCK10	dedicator of cytokinesis 10 [Source:HGNC Symbol;Acc:HGNC:23479]	2067.07	1595.88	1985.45	1558.97	1907.71	1417.18	dedicator of cytokinesis 10 [Source:HGNC Symbol;Acc:HGNC:23479]
ENSG00000185989	2183.79	0.425208	0.0866749	4.90578	9.30551e-07	1.25839e-05	RASA3	RAS p21 protein activator 3 [Source:HGNC Symbol;Acc:HGNC:20331]	2011.28	2336.95	1896.95	2655.27	1650.84	2551.44	RAS p21 protein activator 3 [Source:HGNC Symbol;Acc:HGNC:20331]
ENSG00000028137	1803.41	-0.464075	0.0946184	-4.9047	9.35683e-07	1.26423e-05	TNFRSF1B	TNF receptor superfamily member 1B [Source:HGNC Symbol;Acc:HGNC:11917]	2273.11	1392.35	2001.92	1721.94	2029.46	1401.68	TNF receptor superfamily member 1B [Source:HGNC Symbol;Acc:HGNC:11917]
ENSG00000132912	2190.61	-0.339775	0.0692792	-4.90442	9.37029e-07	1.2649e-05	DCTN4	dynactin subunit 4 [Source:HGNC Symbol;Acc:HGNC:15518]	2426.33	2038.84	2471.89	1830.2	2457.99	1918.43	dynactin subunit 4 [Source:HGNC Symbol;Acc:HGNC:15518]
ENSG00000279419	112.881	-0.90869	0.185286	-4.90426	9.37811e-07	1.2649e-05	RP5-907C10.3		145.788	74.2269	181.272	78.6324	131.482	65.8853
ENSG00000161835	129.124	0.90336	0.184268	4.90243	9.46569e-07	1.27561e-05	GRASP	general receptor for phosphoinositides 1 associated scaffold protein [Source:HGNC Symbol;Acc:HGNC:18707]	103.391	150.848	75.6825	206.268	70.6109	167.943	general receptor for phosphoinositides 1 associated scaffold protein [Source:HGNC Symbol;Acc:HGNC:18707]
ENSG00000108523	1104.06	0.398302	0.0812696	4.90099	9.53529e-07	1.28387e-05	RNF167	ring finger protein 167 [Source:HGNC Symbol;Acc:HGNC:24544]	998.947	1200.8	930.163	1302.56	915.507	1276.37	ring finger protein 167 [Source:HGNC Symbol;Acc:HGNC:24544]
ENSG00000234745	71245.4	-0.289353	0.0590459	-4.90047	9.56072e-07	1.28618e-05	HLA-B	major histocompatibility complex, class I, B [Source:HGNC Symbol;Acc:HGNC:4932]	80571.8	61256.3	74610.1	66338.4	80208	64487.5	major histocompatibility complex, class I, B [Source:HGNC Symbol;Acc:HGNC:4932]
ENSG00000089094	685.244	0.461129	0.0941304	4.89883	9.64086e-07	1.29584e-05	KDM2B	lysine demethylase 2B [Source:HGNC Symbol;Acc:HGNC:13610]	618.113	802.129	556.633	773.788	541.756	819.045	lysine demethylase 2B [Source:HGNC Symbol;Acc:HGNC:13610]
ENSG00000134259	96.4366	-0.918968	0.187666	-4.89682	9.73998e-07	1.30802e-05	NGF	nerve growth factor [Source:HGNC Symbol;Acc:HGNC:7808]	135.375	71.8325	123.9	58.1196	135.135	54.2585	nerve growth factor [Source:HGNC Symbol;Acc:HGNC:7808]
ENSG00000138031	874.75	0.471018	0.0962045	4.89601	9.78033e-07	1.31231e-05	ADCY3	adenylate cyclase 3 [Source:HGNC Symbol;Acc:HGNC:234]	796.629	941.005	696.401	1032.48	689.065	1092.92	adenylate cyclase 3 [Source:HGNC Symbol;Acc:HGNC:234]
ENSG00000105438	3987.15	0.3368	0.0688133	4.8944	9.86068e-07	1.32194e-05	KDELR1	KDEL endoplasmic reticulum protein retention receptor 1 [Source:HGNC Symbol;Acc:HGNC:6304]	3585.2	4211.78	3582.1	4770.36	3375.93	4397.52	KDEL endoplasmic reticulum protein retention receptor 1 [Source:HGNC Symbol;Acc:HGNC:6304]
ENSG00000139263	742.088	-0.545685	0.111569	-4.89099	1.00332e-06	1.34391e-05	LRIG3	leucine rich repeats and immunoglobulin like domains 3 [Source:HGNC Symbol;Acc:HGNC:30991]	824.15	610.576	796.498	580.056	1046.99	594.26	leucine rich repeats and immunoglobulin like domains 3 [Source:HGNC Symbol;Acc:HGNC:30991]
ENSG00000173706	8872.84	-0.401989	0.082195	-4.89067	1.00491e-06	1.34488e-05	HEG1	heart development protein with EGF like domains 1 [Source:HGNC Symbol;Acc:HGNC:29227]	10184.4	8357.71	9971.78	6580.05	10244.7	7898.49	heart development protein with EGF like domains 1 [Source:HGNC Symbol;Acc:HGNC:29227]
ENSG00000148110	2485.07	-0.313781	0.0641626	-4.8904	1.00629e-06	1.34556e-05	HIATL1	major facilitator superfamily domain containing 14B [Source:HGNC Symbol;Acc:HGNC:23376]	2691.88	2194.48	2730.67	2245.01	2856.09	2192.3	major facilitator superfamily domain containing 14B [Source:HGNC Symbol;Acc:HGNC:23376]
ENSG00000204580	1457.86	0.374295	0.0765952	4.88666	1.02561e-06	1.37022e-05	DDR1	discoidin domain receptor tyrosine kinase 1 [Source:HGNC Symbol;Acc:HGNC:2730]	1280.85	1540.81	1231.06	1685.47	1285.61	1723.35	discoidin domain receptor tyrosine kinase 1 [Source:HGNC Symbol;Acc:HGNC:2730]
ENSG00000121753	485.043	0.549145	0.112387	4.88621	1.02797e-06	1.37219e-05	BAI2	adhesion G protein-coupled receptor B2 [Source:HGNC Symbol;Acc:HGNC:944]	422.489	568.674	405.878	568.66	334.793	609.762	adhesion G protein-coupled receptor B2 [Source:HGNC Symbol;Acc:HGNC:944]
ENSG00000132963	2479.07	-0.340553	0.0697069	-4.88551	1.03163e-06	1.37589e-05	POMP	proteasome maturation protein [Source:HGNC Symbol;Acc:HGNC:20330]	2644.27	2265.12	2763.63	2158.4	2923.05	2119.96	proteasome maturation protein [Source:HGNC Symbol;Acc:HGNC:20330]
ENSG00000213923	3108.43	0.48466	0.0992363	4.8839	1.04008e-06	1.38597e-05	CSNK1E	casein kinase 1 epsilon [Source:HGNC Symbol;Acc:HGNC:2453]	2886.76	3189.36	2536.59	4049	2285.12	3703.79	casein kinase 1 epsilon [Source:HGNC Symbol;Acc:HGNC:2453]
ENSG00000172716	649.286	-0.449083	0.0920062	-4.88102	1.05541e-06	1.40519e-05	SLFN11	schlafen family member 11 [Source:HGNC Symbol;Acc:HGNC:26633]	743.074	563.885	750.111	517.378	765.764	555.504	schlafen family member 11 [Source:HGNC Symbol;Acc:HGNC:26633]
ENSG00000148737	529.496	-0.548717	0.112472	-4.8787	1.0679e-06	1.4206e-05	TCF7L2	transcription factor 7 like 2 [Source:HGNC Symbol;Acc:HGNC:11641]	650.097	456.136	587.15	368.091	665.934	449.57	transcription factor 7 like 2 [Source:HGNC Symbol;Acc:HGNC:11641]
ENSG00000110446	4828.35	-0.420082	0.0861173	-4.87802	1.07154e-06	1.42422e-05	SLC15A3	solute carrier family 15 member 3 [Source:HGNC Symbol;Acc:HGNC:18068]	6145.42	4093.25	5537.64	4423.93	4954.94	3814.89	solute carrier family 15 member 3 [Source:HGNC Symbol;Acc:HGNC:18068]
ENSG00000198324	231.672	0.722687	0.148158	4.8778	1.07274e-06	1.4246e-05	FAM109A	family with sequence similarity 109 member A [Source:HGNC Symbol;Acc:HGNC:26509]	167.359	240.639	176.999	339.601	163.136	302.297	family with sequence similarity 109 member A [Source:HGNC Symbol;Acc:HGNC:26509]
ENSG00000050165	15817	-0.270097	0.0553762	-4.87748	1.07447e-06	1.42567e-05	DKK3	dickkopf WNT signaling pathway inhibitor 3 [Source:HGNC Symbol;Acc:HGNC:2893]	18037.6	14130.6	16805.8	14623.3	17089.1	14215.7	dickkopf WNT signaling pathway inhibitor 3 [Source:HGNC Symbol;Acc:HGNC:2893]
ENSG00000144749	462.572	-0.568424	0.116594	-4.87526	1.08663e-06	1.44058e-05	LRIG1	leucine rich repeats and immunoglobulin like domains 1 [Source:HGNC Symbol;Acc:HGNC:17360]	618.113	366.346	555.412	396.581	497.929	341.053	leucine rich repeats and immunoglobulin like domains 1 [Source:HGNC Symbol;Acc:HGNC:17360]
ENSG00000145476	1313.83	-0.38325	0.0786292	-4.87415	1.0928e-06	1.44751e-05	CYP4V2	cytochrome P450 family 4 subfamily V member 2 [Source:HGNC Symbol;Acc:HGNC:23198]	1461.6	1188.83	1572.85	1103.13	1437.79	1118.76	cytochrome P450 family 4 subfamily V member 2 [Source:HGNC Symbol;Acc:HGNC:23198]
ENSG00000130940	40.6463	-1.17646	0.24148	-4.87187	1.10545e-06	1.46302e-05	CASZ1	castor zinc finger 1 [Source:HGNC Symbol;Acc:HGNC:26002]	69.1751	15.5637	62.255	12.5356	57.2192	27.1293	castor zinc finger 1 [Source:HGNC Symbol;Acc:HGNC:26002]
ENSG00000164933	533.237	-0.473181	0.0971477	-4.87073	1.11185e-06	1.47024e-05	SLC25A32	solute carrier family 25 member 32 [Source:HGNC Symbol;Acc:HGNC:29683]	612.906	458.531	627.433	431.908	629.411	439.235	solute carrier family 25 member 32 [Source:HGNC Symbol;Acc:HGNC:29683]
ENSG00000180817	5061.61	-0.396039	0.0813484	-4.86843	1.12487e-06	1.48619e-05	PPA1	pyrophosphatase (inorganic) 1 [Source:HGNC Symbol;Acc:HGNC:9226]	5415.74	4417.7	5403.37	4134.47	6496.21	4502.16	pyrophosphatase (inorganic) 1 [Source:HGNC Symbol;Acc:HGNC:9226]
ENSG00000128335	5467.02	-0.405592	0.0833349	-4.86702	1.13295e-06	1.49559e-05	APOL2	apolipoprotein L2 [Source:HGNC Symbol;Acc:HGNC:619]	6761.31	5161.16	6117.47	4225.64	5872.88	4663.65	apolipoprotein L2 [Source:HGNC Symbol;Acc:HGNC:619]
ENSG00000138185	308.343	0.642698	0.132136	4.8639	1.15095e-06	1.51806e-05	ENTPD1	ectonucleoside triphosphate diphosphohydrolase 1 [Source:HGNC Symbol;Acc:HGNC:3363]	244.716	422.614	230.71	320.228	231.312	400.479	ectonucleoside triphosphate diphosphohydrolase 1 [Source:HGNC Symbol;Acc:HGNC:3363]
ENSG00000163872	2019.98	-0.410724	0.0844683	-4.86246	1.15938e-06	1.52658e-05	YEATS2	YEATS domain containing 2 [Source:HGNC Symbol;Acc:HGNC:25489]	2404.76	1818.56	2269.87	1521.37	2264.42	1840.91	YEATS domain containing 2 [Source:HGNC Symbol;Acc:HGNC:25489]
ENSG00000070061	915.944	0.411825	0.0846925	4.86259	1.15858e-06	1.52658e-05	IKBKAP	inhibitor of kappa light polypeptide gene enhancer in B-cells, kinase complex-associated protein [Source:HGNC Symbol;Acc:HGNC:5959]	753.488	1064.32	815.418	1087.18	777.938	997.323	inhibitor of kappa light polypeptide gene enhancer in B-cells, kinase complex-associated protein [Source:HGNC Symbol;Acc:HGNC:5959]
ENSG00000084090	1827.86	-0.338384	0.0696008	-4.86179	1.16332e-06	1.53047e-05	STARD7	StAR related lipid transfer domain containing 7 [Source:HGNC Symbol;Acc:HGNC:18063]	2023.18	1673.7	2006.2	1570.37	2108.59	1585.12	StAR related lipid transfer domain containing 7 [Source:HGNC Symbol;Acc:HGNC:18063]
ENSG00000100697	3588.99	-0.37133	0.0764048	-4.86003	1.17369e-06	1.5428e-05	DICER1	dicer 1, ribonuclease III [Source:HGNC Symbol;Acc:HGNC:17098]	4121.5	3453.94	4077.7	2875.21	3976.13	3029.43	dicer 1, ribonuclease III [Source:HGNC Symbol;Acc:HGNC:17098]
ENSG00000122035	718.197	0.497732	0.102455	4.85805	1.18548e-06	1.55699e-05	RASL11A	RAS like family 11 member A [Source:HGNC Symbol;Acc:HGNC:23802]	606.212	761.424	537.102	888.888	630.629	884.93	RAS like family 11 member A [Source:HGNC Symbol;Acc:HGNC:23802]
ENSG00000049192	199.483	-0.732947	0.150917	-4.85664	1.19396e-06	1.56679e-05	ADAMTS6	ADAM metallopeptidase with thrombospondin type 1 motif 6 [Source:HGNC Symbol;Acc:HGNC:222]	222.402	153.243	268.551	128.775	271.487	152.441	ADAM metallopeptidase with thrombospondin type 1 motif 6 [Source:HGNC Symbol;Acc:HGNC:222]
ENSG00000148842	828.439	0.432756	0.0891147	4.85617	1.19679e-06	1.56918e-05	CNNM2	cyclin and CBS domain divalent metal cation transport mediator 2 [Source:HGNC Symbol;Acc:HGNC:103]	722.247	887.131	672.598	988.033	709.762	990.864	cyclin and CBS domain divalent metal cation transport mediator 2 [Source:HGNC Symbol;Acc:HGNC:103]
ENSG00000197170	1300.45	-0.377452	0.0777492	-4.85474	1.20547e-06	1.57923e-05	PSMD12	proteasome 26S subunit, non-ATPase 12 [Source:HGNC Symbol;Acc:HGNC:9557]	1433.34	1186.43	1509.99	1130.48	1477.96	1064.5	proteasome 26S subunit, non-ATPase 12 [Source:HGNC Symbol;Acc:HGNC:9557]
ENSG00000139508	223.61	0.669121	0.137884	4.85279	1.21735e-06	1.59344e-05	SLC46A3	solute carrier family 46 member 3 [Source:HGNC Symbol;Acc:HGNC:27501]	151.739	270.569	169.065	274.644	186.267	289.379	solute carrier family 46 member 3 [Source:HGNC Symbol;Acc:HGNC:27501]
ENSG00000184164	699.351	0.55991	0.11545	4.84979	1.23594e-06	1.61641e-05	CRELD2	cysteine rich with EGF like domains 2 [Source:HGNC Symbol;Acc:HGNC:28150]	601.005	775.791	576.164	978.916	494.277	769.954	cysteine rich with EGF like domains 2 [Source:HGNC Symbol;Acc:HGNC:28150]
ENSG00000183309	517.5	0.530061	0.109302	4.84949	1.23779e-06	1.61747e-05	ZNF623	zinc finger protein 623 [Source:HGNC Symbol;Acc:HGNC:29084]	385.298	656.07	458.368	569.8	411.491	623.973	zinc finger protein 623 [Source:HGNC Symbol;Acc:HGNC:29084]
ENSG00000159314	355.523	-0.612573	0.126326	-4.84914	1.23998e-06	1.61897e-05	ARHGAP27	Rho GTPase activating protein 27 [Source:HGNC Symbol;Acc:HGNC:31813]	496.127	293.316	409.54	271.225	398.1	264.833	Rho GTPase activating protein 27 [Source:HGNC Symbol;Acc:HGNC:31813]
ENSG00000106560	168.735	-0.850606	0.175494	-4.84693	1.25389e-06	1.63576e-05	GIMAP2	GTPase, IMAP family member 2 [Source:HGNC Symbol;Acc:HGNC:21789]	198.599	134.087	198.972	94.5868	276.357	109.809	GTPase, IMAP family member 2 [Source:HGNC Symbol;Acc:HGNC:21789]
ENSG00000156535	4093.17	0.342121	0.0706738	4.84085	1.29287e-06	1.68518e-05	CD109	CD109 molecule [Source:HGNC Symbol;Acc:HGNC:21685]	3556.94	4859.47	3722.48	4218.8	3519.59	4681.73	CD109 molecule [Source:HGNC Symbol;Acc:HGNC:21685]
ENSG00000163554	36.0686	-1.20045	0.248347	-4.83376	1.33981e-06	1.7449e-05	SPTA1	spectrin alpha, erythrocytic 1 [Source:HGNC Symbol;Acc:HGNC:11272]	49.8358	19.1553	54.3205	6.8376	68.1761	18.0862	spectrin alpha, erythrocytic 1 [Source:HGNC Symbol;Acc:HGNC:11272]
ENSG00000131779	802.371	-0.447971	0.0926855	-4.83324	1.34326e-06	1.74793e-05	PEX11B	peroxisomal biogenesis factor 11 beta [Source:HGNC Symbol;Acc:HGNC:8853]	984.815	627.337	878.283	689.458	927.682	706.652	peroxisomal biogenesis factor 11 beta [Source:HGNC Symbol;Acc:HGNC:8853]
ENSG00000174808	22.3601	-1.23404	0.25539	-4.83197	1.35191e-06	1.75771e-05	BTC	betacellulin [Source:HGNC Symbol;Acc:HGNC:1121]	40.1662	7.18325	33.5689	9.1168	38.9578	5.16748	betacellulin [Source:HGNC Symbol;Acc:HGNC:1121]
ENSG00000153395	1566.25	0.401299	0.0830646	4.83117	1.35736e-06	1.76331e-05	LPCAT1	lysophosphatidylcholine acyltransferase 1 [Source:HGNC Symbol;Acc:HGNC:25718]	1388.71	1654.54	1387.92	1919.09	1251.52	1795.7	lysophosphatidylcholine acyltransferase 1 [Source:HGNC Symbol;Acc:HGNC:25718]
ENSG00000088387	1154.24	-0.488547	0.101158	-4.82956	1.36838e-06	1.77615e-05	DOCK9	dedicator of cytokinesis 9 [Source:HGNC Symbol;Acc:HGNC:14132]	1322.51	1061.92	1399.52	798.859	1344.04	998.615	dedicator of cytokinesis 9 [Source:HGNC Symbol;Acc:HGNC:14132]
ENSG00000134352	15916.8	-0.352261	0.0729592	-4.82819	1.3778e-06	1.78688e-05	IL6ST	interleukin 6 signal transducer [Source:HGNC Symbol;Acc:HGNC:6021]	17055	15355.4	18567.9	13489.4	18049.6	12983.3	interleukin 6 signal transducer [Source:HGNC Symbol;Acc:HGNC:6021]
ENSG00000163462	256.479	0.649862	0.134614	4.82761	1.3818e-06	1.78926e-05	TRIM46	tripartite motif containing 46 [Source:HGNC Symbol;Acc:HGNC:19019]	191.905	331.627	182.493	282.621	213.05	337.178	tripartite motif containing 46 [Source:HGNC Symbol;Acc:HGNC:19019]
ENSG00000002933	821.135	-0.549681	0.113862	-4.82759	1.38194e-06	1.78926e-05	TMEM176A	transmembrane protein 176A [Source:HGNC Symbol;Acc:HGNC:24930]	913.408	611.773	901.476	616.523	1139.51	744.117	transmembrane protein 176A [Source:HGNC Symbol;Acc:HGNC:24930]
ENSG00000105993	1760.78	-0.34786	0.072065	-4.82702	1.38589e-06	1.79288e-05	DNAJB6	DnaJ heat shock protein family (Hsp40) member B6 [Source:HGNC Symbol;Acc:HGNC:14888]	1929.46	1618.63	2050.14	1492.88	1947.89	1525.7	DnaJ heat shock protein family (Hsp40) member B6 [Source:HGNC Symbol;Acc:HGNC:14888]
ENSG00000102996	234.185	0.79094	0.163899	4.82578	1.39458e-06	1.80262e-05	MMP15	matrix metallopeptidase 15 [Source:HGNC Symbol;Acc:HGNC:7161]	180.748	238.244	160.52	385.185	149.744	290.671	matrix metallopeptidase 15 [Source:HGNC Symbol;Acc:HGNC:7161]
ENSG00000003989	4477.54	-0.326821	0.06773	-4.82534	1.39761e-06	1.80503e-05	SLC7A2	solute carrier family 7 member 2 [Source:HGNC Symbol;Acc:HGNC:11060]	5285.57	4088.46	4742.36	3774.35	4946.42	4028.05	solute carrier family 7 member 2 [Source:HGNC Symbol;Acc:HGNC:11060]
ENSG00000134253	87.2136	0.967528	0.200546	4.82447	1.40373e-06	1.81142e-05	TRIM45	tripartite motif containing 45 [Source:HGNC Symbol;Acc:HGNC:19018]	46.1167	102.96	48.8274	116.239	65.7412	143.397	tripartite motif containing 45 [Source:HGNC Symbol;Acc:HGNC:19018]
ENSG00000086589	1089.96	-0.434881	0.0901451	-4.82423	1.40544e-06	1.81211e-05	RBM22	RNA binding motif protein 22 [Source:HGNC Symbol;Acc:HGNC:25503]	1267.47	942.203	1226.18	819.372	1280.74	1003.78	RNA binding motif protein 22 [Source:HGNC Symbol;Acc:HGNC:25503]
ENSG00000152661	7766.7	0.271994	0.056399	4.82268	1.41643e-06	1.82429e-05	GJA1	gap junction protein alpha 1 [Source:HGNC Symbol;Acc:HGNC:4274]	6788.08	8331.37	7126.97	8470.64	7169.45	8713.66	gap junction protein alpha 1 [Source:HGNC Symbol;Acc:HGNC:4274]
ENSG00000173805	53.0928	1.06596	0.221037	4.82257	1.41724e-06	1.82429e-05	HAP1	huntingtin associated protein 1 [Source:HGNC Symbol;Acc:HGNC:4812]	31.9842	70.6353	26.8551	90.0284	28.0009	71.0528	huntingtin associated protein 1 [Source:HGNC Symbol;Acc:HGNC:4812]
ENSG00000179262	1483.17	0.40173	0.0833508	4.81975	1.43739e-06	1.8487e-05	RAD23A	RAD23 homolog A, nucleotide excision repair protein [Source:HGNC Symbol;Acc:HGNC:9812]	1331.43	1561.16	1224.96	1838.17	1261.26	1682.01	RAD23 homolog A, nucleotide excision repair protein [Source:HGNC Symbol;Acc:HGNC:9812]
ENSG00000134250	7516.58	-0.300681	0.0624148	-4.81746	1.45397e-06	1.86848e-05	NOTCH2	notch 2 [Source:HGNC Symbol;Acc:HGNC:7882]	8277.21	7166.49	8231.69	6388.6	8418.53	6616.95	notch 2 [Source:HGNC Symbol;Acc:HGNC:7882]
ENSG00000143303	335.471	0.578808	0.120219	4.8146	1.47496e-06	1.89388e-05	RRNAD1	ribosomal RNA adenine dimethylase domain containing 1 [Source:HGNC Symbol;Acc:HGNC:24273]	255.873	377.12	252.072	428.489	289.748	409.523	ribosomal RNA adenine dimethylase domain containing 1 [Source:HGNC Symbol;Acc:HGNC:24273]
ENSG00000102755	3422.06	-0.31253	0.0649234	-4.81383	1.48066e-06	1.89963e-05	FLT1	fms related tyrosine kinase 1 [Source:HGNC Symbol;Acc:HGNC:3763]	3745.87	3190.56	3814.64	2874.07	3831.25	3075.94	fms related tyrosine kinase 1 [Source:HGNC Symbol;Acc:HGNC:3763]
ENSG00000168899	1987.44	-0.453678	0.0942759	-4.81224	1.49247e-06	1.9132e-05	VAMP5	vesicle associated membrane protein 5 [Source:HGNC Symbol;Acc:HGNC:12646]	2296.17	1577.92	2023.29	1652.42	2610.17	1764.69	vesicle associated membrane protein 5 [Source:HGNC Symbol;Acc:HGNC:12646]
ENSG00000234362	69.5885	-1.02935	0.214036	-4.80924	1.51503e-06	1.94051e-05	AC104654.2		83.3076	49.0855	104.979	31.9088	110.786	37.4642
ENSG00000115271	134.36	-0.852645	0.177327	-4.80833	1.52193e-06	1.94775e-05	GCA	grancalcin [Source:HGNC Symbol;Acc:HGNC:15990]	181.492	99.3683	166.013	67.2364	188.702	103.35	grancalcin [Source:HGNC Symbol;Acc:HGNC:15990]
ENSG00000135932	2215.63	-0.320566	0.0666923	-4.80664	1.53487e-06	1.96269e-05	CAB39	calcium binding protein 39 [Source:HGNC Symbol;Acc:HGNC:20292]	2379.47	2018.49	2485.93	1919.09	2531.04	1959.77	calcium binding protein 39 [Source:HGNC Symbol;Acc:HGNC:20292]
ENSG00000090924	1276.44	0.442172	0.0920504	4.80358	1.55853e-06	1.9913e-05	PLEKHG2	pleckstrin homology and RhoGEF domain containing G2 [Source:HGNC Symbol;Acc:HGNC:29515]	1199.78	1471.37	1075.42	1449.57	947.161	1515.36	pleckstrin homology and RhoGEF domain containing G2 [Source:HGNC Symbol;Acc:HGNC:29515]
ENSG00000182628	848.755	-0.499074	0.103931	-4.80195	1.5713e-06	2.00596e-05	SKA2	spindle and kinetochore associated complex subunit 2 [Source:HGNC Symbol;Acc:HGNC:28006]	897.044	753.044	988.145	640.455	1118.82	695.026	spindle and kinetochore associated complex subunit 2 [Source:HGNC Symbol;Acc:HGNC:28006]
ENSG00000196954	3243.18	-0.335886	0.0699873	-4.79925	1.59264e-06	2.03153e-05	CASP4	caspase 4 [Source:HGNC Symbol;Acc:HGNC:1505]	3750.33	3060.06	3478.34	2743.02	3651.07	2776.23	caspase 4 [Source:HGNC Symbol;Acc:HGNC:1505]
ENSG00000116337	997.829	0.562489	0.117388	4.79173	1.65353e-06	2.10747e-05	AMPD2	adenosine monophosphate deaminase 2 [Source:HGNC Symbol;Acc:HGNC:469]	917.871	1059.53	767.811	1389.17	696.37	1156.22	adenosine monophosphate deaminase 2 [Source:HGNC Symbol;Acc:HGNC:469]
ENSG00000110318	209.113	0.73549	0.153521	4.79082	1.66102e-06	2.11527e-05	KIAA1377	centrosomal protein 126 [Source:HGNC Symbol;Acc:HGNC:29264]	130.168	294.513	155.027	226.78	170.44	277.752	centrosomal protein 126 [Source:HGNC Symbol;Acc:HGNC:29264]
ENSG00000166313	1028.84	0.391497	0.0817265	4.79033	1.66509e-06	2.11872e-05	APBB1	amyloid beta precursor protein binding family B member 1 [Source:HGNC Symbol;Acc:HGNC:581]	918.615	1126.57	894.152	1169.23	843.679	1220.82	amyloid beta precursor protein binding family B member 1 [Source:HGNC Symbol;Acc:HGNC:581]
ENSG00000188130	701.145	0.426678	0.0891049	4.78849	1.68044e-06	2.1365e-05	MAPK12	mitogen-activated protein kinase 12 [Source:HGNC Symbol;Acc:HGNC:6874]	579.434	796.143	602.408	842.164	603.845	782.873	mitogen-activated protein kinase 12 [Source:HGNC Symbol;Acc:HGNC:6874]
ENSG00000198087	1023.42	-0.443334	0.0926035	-4.78745	1.68916e-06	2.14583e-05	CD2AP	CD2 associated protein [Source:HGNC Symbol;Acc:HGNC:14258]	1150.69	964.95	1211.53	781.765	1191.86	839.715	CD2 associated protein [Source:HGNC Symbol;Acc:HGNC:14258]
ENSG00000163637	793.573	0.421038	0.0879748	4.78589	1.70231e-06	2.16076e-05	PRICKLE2	prickle planar cell polarity protein 2 [Source:HGNC Symbol;Acc:HGNC:20340]	700.676	931.428	663.443	860.398	659.847	945.648	prickle planar cell polarity protein 2 [Source:HGNC Symbol;Acc:HGNC:20340]
ENSG00000133398	887.85	-0.431281	0.0901239	-4.78542	1.70627e-06	2.16402e-05	MED10	mediator complex subunit 10 [Source:HGNC Symbol;Acc:HGNC:28760]	1081.51	800.932	995.469	697.435	993.423	758.327	mediator complex subunit 10 [Source:HGNC Symbol;Acc:HGNC:28760]
ENSG00000101310	1195.62	-0.39862	0.0833114	-4.7847	1.71242e-06	2.17004e-05	SEC23B	Sec23 homolog B, coat complex II component [Source:HGNC Symbol;Acc:HGNC:10702]	1270.44	1018.82	1381.21	1072.36	1443.87	986.988	Sec23 homolog B, coat complex II component [Source:HGNC Symbol;Acc:HGNC:10702]
ENSG00000205220	814.354	-0.459339	0.0960206	-4.78375	1.72053e-06	2.17854e-05	PSMB10	proteasome subunit beta 10 [Source:HGNC Symbol;Acc:HGNC:9538]	1010.85	714.733	872.18	630.199	960.552	697.609	proteasome subunit beta 10 [Source:HGNC Symbol;Acc:HGNC:9538]
ENSG00000182179	4730.37	-0.360549	0.0753955	-4.7821	1.73475e-06	2.19476e-05	UBA7	ubiquitin like modifier activating enzyme 7 [Source:HGNC Symbol;Acc:HGNC:12471]	5548.88	4441.64	5284.96	3725.35	5158.25	4223.12	ubiquitin like modifier activating enzyme 7 [Source:HGNC Symbol;Acc:HGNC:12471]
ENSG00000189319	731.137	-0.423547	0.0885765	-4.78171	1.73808e-06	2.19718e-05	FAM53B	family with sequence similarity 53 member B [Source:HGNC Symbol;Acc:HGNC:28968]	876.961	628.534	811.146	618.803	835.157	616.222	family with sequence similarity 53 member B [Source:HGNC Symbol;Acc:HGNC:28968]
ENSG00000104432	164.193	-0.753857	0.157696	-4.78045	1.74907e-06	2.20927e-05	IL7	interleukin 7 [Source:HGNC Symbol;Acc:HGNC:6023]	202.318	122.115	192.868	111.681	238.616	117.56	interleukin 7 [Source:HGNC Symbol;Acc:HGNC:6023]
ENSG00000148498	1462.9	-0.38044	0.0795948	-4.77971	1.75551e-06	2.2156e-05	PARD3	par-3 family cell polarity regulator [Source:HGNC Symbol;Acc:HGNC:16051]	1695.9	1304.96	1607.03	1162.39	1675.18	1331.92	par-3 family cell polarity regulator [Source:HGNC Symbol;Acc:HGNC:16051]
ENSG00000143147	561.467	0.47104	0.0985897	4.77779	1.77236e-06	2.23505e-05	GPR161	G protein-coupled receptor 161 [Source:HGNC Symbol;Acc:HGNC:23694]	458.936	605.787	465.692	680.341	477.233	680.815	G protein-coupled receptor 161 [Source:HGNC Symbol;Acc:HGNC:23694]
ENSG00000173511	805.544	0.535157	0.112018	4.77742	1.77555e-06	2.23725e-05	VEGFB	vascular endothelial growth factor B [Source:HGNC Symbol;Acc:HGNC:12681]	735.636	883.539	631.095	1092.88	581.932	908.184	vascular endothelial growth factor B [Source:HGNC Symbol;Acc:HGNC:12681]
ENSG00000164619	841.775	-0.49982	0.104632	-4.77694	1.77981e-06	2.2408e-05	BMPER	BMP binding endothelial regulator [Source:HGNC Symbol;Acc:HGNC:24154]	943.161	674.028	1031.48	794.301	1004.38	603.303	BMP binding endothelial regulator [Source:HGNC Symbol;Acc:HGNC:24154]
ENSG00000137364	379.108	-0.555962	0.116519	-4.77143	1.82923e-06	2.30115e-05	TPMT	thiopurine S-methyltransferase [Source:HGNC Symbol;Acc:HGNC:12014]	420.257	308.88	450.433	288.319	496.712	310.049	thiopurine S-methyltransferase [Source:HGNC Symbol;Acc:HGNC:12014]
ENSG00000173821	51123.2	-0.440283	0.0922939	-4.77044	1.83822e-06	2.31059e-05	RNF213	ring finger protein 213 [Source:HGNC Symbol;Acc:HGNC:14539]	61861.1	48586.3	59997.3	36145.8	55520.9	44627.6	ring finger protein 213 [Source:HGNC Symbol;Acc:HGNC:14539]
ENSG00000138134	2212.46	0.350576	0.0735389	4.76722	1.86786e-06	2.34595e-05	STAMBPL1	STAM binding protein like 1 [Source:HGNC Symbol;Acc:HGNC:24105]	1983.76	2341.74	2003.76	2593.73	1826.15	2525.6	STAM binding protein like 1 [Source:HGNC Symbol;Acc:HGNC:24105]
ENSG00000143952	754.055	-0.463084	0.0971833	-4.76505	1.88803e-06	2.36936e-05	VPS54	VPS54, GARP complex subunit [Source:HGNC Symbol;Acc:HGNC:18652]	806.299	641.703	867.297	641.595	965.422	602.011	VPS54, GARP complex subunit [Source:HGNC Symbol;Acc:HGNC:18652]
ENSG00000139874	1512.4	0.515789	0.108266	4.76409	1.89712e-06	2.37883e-05	SSTR1	somatostatin receptor 1 [Source:HGNC Symbol;Acc:HGNC:11330]	1247.38	1672.5	1365.34	2085.47	1079.86	1623.88	somatostatin receptor 1 [Source:HGNC Symbol;Acc:HGNC:11330]
ENSG00000102302	496.283	0.482417	0.10143	4.75614	1.97327e-06	2.47233e-05	FGD1	FYVE, RhoGEF and PH domain containing 1 [Source:HGNC Symbol;Acc:HGNC:3663]	413.563	548.321	422.357	598.29	394.447	600.719	FYVE, RhoGEF and PH domain containing 1 [Source:HGNC Symbol;Acc:HGNC:3663]
ENSG00000170340	667.108	-0.43346	0.0912075	-4.75246	2.00952e-06	2.51571e-05	B3GNT2	UDP-GlcNAc:betaGal beta-1,3-N-acetylglucosaminyltransferase 2 [Source:HGNC Symbol;Acc:HGNC:15629]	779.521	593.815	764.149	541.31	765.764	558.087	UDP-GlcNAc:betaGal beta-1,3-N-acetylglucosaminyltransferase 2 [Source:HGNC Symbol;Acc:HGNC:15629]
ENSG00000176463	876.094	-0.395724	0.083313	-4.74985	2.0357e-06	2.54643e-05	SLCO3A1	solute carrier organic anion transporter family member 3A1 [Source:HGNC Symbol;Acc:HGNC:10952]	1038.37	742.269	972.887	762.392	984.901	755.743	solute carrier organic anion transporter family member 3A1 [Source:HGNC Symbol;Acc:HGNC:10952]
ENSG00000114735	493.34	0.513709	0.108187	4.74835	2.05081e-06	2.56326e-05	HEMK1	HemK methyltransferase family member 1 [Source:HGNC Symbol;Acc:HGNC:24923]	417.282	545.927	411.981	565.241	374.968	644.643	HemK methyltransferase family member 1 [Source:HGNC Symbol;Acc:HGNC:24923]
ENSG00000106261	1899.39	0.442018	0.0932151	4.74191	2.11708e-06	2.64396e-05	ZKSCAN1	zinc finger with KRAB and SCAN domains 1 [Source:HGNC Symbol;Acc:HGNC:13101]	1624.5	2309.41	1775.49	2038.74	1395.17	2253.02	zinc finger with KRAB and SCAN domains 1 [Source:HGNC Symbol;Acc:HGNC:13101]
ENSG00000148700	6518.32	-0.347431	0.0733774	-4.73485	2.1922e-06	2.73558e-05	ADD3	adducin 3 [Source:HGNC Symbol;Acc:HGNC:245]	7534.88	6062.66	6861.48	5234.18	7552.94	5863.79	adducin 3 [Source:HGNC Symbol;Acc:HGNC:245]
ENSG00000091651	297.15	-0.576918	0.121958	-4.73046	2.24015e-06	2.79316e-05	ORC6	origin recognition complex subunit 6 [Source:HGNC Symbol;Acc:HGNC:17151]	375.628	232.258	349.726	246.154	353.055	226.077	origin recognition complex subunit 6 [Source:HGNC Symbol;Acc:HGNC:17151]
ENSG00000138755	18.2689	-1.20455	0.254719	-4.72894	2.25698e-06	2.81189e-05	CXCL9	C-X-C motif chemokine ligand 9 [Source:HGNC Symbol;Acc:HGNC:7098]	34.2156	8.38045	23.193	1.1396	41.3926	1.29187	C-X-C motif chemokine ligand 9 [Source:HGNC Symbol;Acc:HGNC:7098]
ENSG00000168259	1236.94	-0.354338	0.0749652	-4.72671	2.28191e-06	2.84067e-05	DNAJC7	DnaJ heat shock protein family (Hsp40) member C7 [Source:HGNC Symbol;Acc:HGNC:12392]	1397.63	1120.59	1397.69	1045.01	1378.13	1082.59	DnaJ heat shock protein family (Hsp40) member C7 [Source:HGNC Symbol;Acc:HGNC:12392]
ENSG00000170142	1440.31	-0.352428	0.0745777	-4.72566	2.29374e-06	2.8531e-05	UBE2E1	ubiquitin conjugating enzyme E2 E1 [Source:HGNC Symbol;Acc:HGNC:12477]	1598.46	1225.94	1562.48	1275.21	1699.53	1280.24	ubiquitin conjugating enzyme E2 E1 [Source:HGNC Symbol;Acc:HGNC:12477]
ENSG00000164244	1399.34	0.370253	0.0783821	4.72369	2.31599e-06	2.87847e-05	PRRC1	proline rich coiled-coil 1 [Source:HGNC Symbol;Acc:HGNC:28164]	1146.97	1562.36	1271.95	1656.98	1230.82	1526.99	proline rich coiled-coil 1 [Source:HGNC Symbol;Acc:HGNC:28164]
ENSG00000115129	362.688	0.566741	0.119987	4.72334	2.31998e-06	2.88112e-05	TP53I3	tumor protein p53 inducible protein 3 [Source:HGNC Symbol;Acc:HGNC:19373]	293.808	439.375	314.327	458.119	253.225	417.274	tumor protein p53 inducible protein 3 [Source:HGNC Symbol;Acc:HGNC:19373]
ENSG00000173559	6479.08	-0.819378	0.173497	-4.72271	2.32719e-06	2.88776e-05	NABP1	nucleic acid binding protein 1 [Source:HGNC Symbol;Acc:HGNC:26232]	8704.9	5290.46	9893.66	3993.16	6975.87	4016.42	nucleic acid binding protein 1 [Source:HGNC Symbol;Acc:HGNC:26232]
ENSG00000163960	1396.37	0.385277	0.0815935	4.7219	2.33647e-06	2.89697e-05	UBXN7	UBX domain protein 7 [Source:HGNC Symbol;Acc:HGNC:29119]	1157.38	1631.79	1234.72	1454.13	1225.95	1674.26	UBX domain protein 7 [Source:HGNC Symbol;Acc:HGNC:29119]
ENSG00000103313	22.6582	-1.21018	0.256516	-4.71776	2.38451e-06	2.95416e-05	MEFV	Mediterranean fever [Source:HGNC Symbol;Acc:HGNC:6998]	35.7033	1.19721	29.2965	4.5584	53.5669	11.6268	Mediterranean fever [Source:HGNC Symbol;Acc:HGNC:6998]
ENSG00000169594	295.257	-0.607327	0.128771	-4.71634	2.40128e-06	2.97256e-05	BNC1	basonuclin 1 [Source:HGNC Symbol;Acc:HGNC:1081]	354.057	256.202	342.402	210.826	387.143	220.91	basonuclin 1 [Source:HGNC Symbol;Acc:HGNC:1081]
ENSG00000118507	200	-0.731181	0.155105	-4.71411	2.42771e-06	3.00289e-05	AKAP7	A-kinase anchoring protein 7 [Source:HGNC Symbol;Acc:HGNC:377]	246.204	131.693	227.658	135.612	292.183	166.651	A-kinase anchoring protein 7 [Source:HGNC Symbol;Acc:HGNC:377]
ENSG00000281183	142.47	-0.868387	0.184256	-4.71294	2.44165e-06	3.01773e-05	NPTN-IT1	NPTN intronic transcript 1 [Source:HGNC Symbol;Acc:HGNC:45091]	218.682	75.4241	198.361	88.8888	154.614	118.852	NPTN intronic transcript 1 [Source:HGNC Symbol;Acc:HGNC:45091]
ENSG00000103319	435.067	0.497212	0.105523	4.71188	2.45436e-06	3.03102e-05	EEF2K	eukaryotic elongation factor 2 kinase [Source:HGNC Symbol;Acc:HGNC:24615]	355.545	493.25	374.14	520.797	340.88	525.791	eukaryotic elongation factor 2 kinase [Source:HGNC Symbol;Acc:HGNC:24615]
ENSG00000167283	790.029	0.411355	0.0873428	4.70966	2.48132e-06	3.06188e-05	ATP5L	ATP synthase, H+ transporting, mitochondrial Fo complex subunit G [Source:HGNC Symbol;Acc:HGNC:14247]	692.494	858.398	663.443	949.287	668.369	908.184	ATP synthase, H+ transporting, mitochondrial Fo complex subunit G [Source:HGNC Symbol;Acc:HGNC:14247]
ENSG00000127666	676.547	-0.495803	0.105306	-4.70819	2.49925e-06	3.08155e-05	TICAM1	toll like receptor adaptor molecule 1 [Source:HGNC Symbol;Acc:HGNC:18348]	872.498	512.405	805.653	578.917	709.762	580.049	toll like receptor adaptor molecule 1 [Source:HGNC Symbol;Acc:HGNC:18348]
ENSG00000153147	4927.3	-0.32475	0.0689829	-4.70769	2.50534e-06	3.0866e-05	SMARCA5	SWI/SNF related, matrix associated, actin dependent regulator of chromatin, subfamily a, member 5 [Source:HGNC Symbol;Acc:HGNC:11101]	5375.57	4659.53	5543.13	4017.09	5550.26	4418.19	SWI/SNF related, matrix associated, actin dependent regulator of chromatin, subfamily a, member 5 [Source:HGNC Symbol;Acc:HGNC:11101]
ENSG00000093167	1443.22	-0.381912	0.0811587	-4.70574	2.52944e-06	3.11382e-05	LRRFIP2	LRR binding FLII interacting protein 2 [Source:HGNC Symbol;Acc:HGNC:6703]	1701.86	1349.25	1630.23	1236.47	1581.44	1160.1	LRR binding FLII interacting protein 2 [Source:HGNC Symbol;Acc:HGNC:6703]
ENSG00000155961	18.8482	1.20797	0.25673	4.7052	2.53612e-06	3.11957e-05	RAB39B	RAB39B, member RAS oncogene family [Source:HGNC Symbol;Acc:HGNC:16499]	5.95054	26.3386	6.71377	43.3048	3.65229	27.1293	RAB39B, member RAS oncogene family [Source:HGNC Symbol;Acc:HGNC:16499]
ENSG00000146457	2890.01	-0.338932	0.0721049	-4.70053	2.59481e-06	3.18924e-05	WTAP	Wilms tumor 1 associated protein [Source:HGNC Symbol;Acc:HGNC:16846]	3422.31	2681.75	3054.16	2444.44	3228.62	2508.81	Wilms tumor 1 associated protein [Source:HGNC Symbol;Acc:HGNC:16846]
ENSG00000116604	1405.07	0.513996	0.109397	4.69847	2.62116e-06	3.21907e-05	MEF2D	myocyte enhancer factor 2D [Source:HGNC Symbol;Acc:HGNC:6997]	1361.19	1501.3	1044.91	1761.82	1027.51	1733.69	myocyte enhancer factor 2D [Source:HGNC Symbol;Acc:HGNC:6997]
ENSG00000196663	1416.17	0.380767	0.0811405	4.69269	2.69635e-06	3.30879e-05	TECPR2	tectonin beta-propeller repeat containing 2 [Source:HGNC Symbol;Acc:HGNC:19957]	1288.29	1537.21	1257.31	1612.53	1126.12	1675.55	tectonin beta-propeller repeat containing 2 [Source:HGNC Symbol;Acc:HGNC:19957]
ENSG00000126067	2529.87	-0.304907	0.0649928	-4.69139	2.71356e-06	3.32728e-05	PSMB2	proteasome subunit beta 2 [Source:HGNC Symbol;Acc:HGNC:9539]	2752.13	2223.21	2742.27	2314.53	2910.88	2236.23	proteasome subunit beta 2 [Source:HGNC Symbol;Acc:HGNC:9539]
ENSG00000172594	871.967	0.44706	0.0953181	4.69019	2.72951e-06	3.34262e-05	SMPDL3A	sphingomyelin phosphodiesterase acid like 3A [Source:HGNC Symbol;Acc:HGNC:17389]	663.486	1016.43	725.087	969.799	814.461	1042.54	sphingomyelin phosphodiesterase acid like 3A [Source:HGNC Symbol;Acc:HGNC:17389]
ENSG00000154864	6566.04	0.396226	0.0844809	4.69012	2.73039e-06	3.34262e-05	PIEZO2	piezo type mechanosensitive ion channel component 2 [Source:HGNC Symbol;Acc:HGNC:26270]	5988.48	7632.2	6099.16	7280.9	4838.07	7557.43	piezo type mechanosensitive ion channel component 2 [Source:HGNC Symbol;Acc:HGNC:26270]
ENSG00000116171	2338.9	-0.375986	0.0802601	-4.68459	2.80524e-06	3.42898e-05	SCP2	sterol carrier protein 2 [Source:HGNC Symbol;Acc:HGNC:10606]	2382.45	2074.76	2721.52	1964.67	2847.57	2042.45	sterol carrier protein 2 [Source:HGNC Symbol;Acc:HGNC:10606]
ENSG00000044090	1156.6	0.391468	0.0835681	4.68442	2.80756e-06	3.42898e-05	CUL7	cullin 7 [Source:HGNC Symbol;Acc:HGNC:21024]	1043.58	1319.32	1036.97	1317.38	903.333	1319	cullin 7 [Source:HGNC Symbol;Acc:HGNC:21024]
ENSG00000159256	928.463	-0.423804	0.0904704	-4.68445	2.80716e-06	3.42898e-05	MORC3	MORC family CW-type zinc finger 3 [Source:HGNC Symbol;Acc:HGNC:23572]	1044.32	866.778	1073.59	722.506	1087.17	776.413	MORC family CW-type zinc finger 3 [Source:HGNC Symbol;Acc:HGNC:23572]
ENSG00000246273	342.414	-0.684868	0.146243	-4.68307	2.82609e-06	3.4489e-05	SBF2-AS1	SBF2 antisense RNA 1 [Source:HGNC Symbol;Acc:HGNC:27438]	398.686	326.838	452.264	218.803	438.275	219.618	SBF2 antisense RNA 1 [Source:HGNC Symbol;Acc:HGNC:27438]
ENSG00000139200	56.4572	1.00688	0.215041	4.68224	2.83755e-06	3.46016e-05	PIANP	PILR alpha associated neural protein [Source:HGNC Symbol;Acc:HGNC:25338]	33.4718	76.6213	29.2965	77.4928	35.3055	86.5552	PILR alpha associated neural protein [Source:HGNC Symbol;Acc:HGNC:25338]
ENSG00000145685	985.484	0.403513	0.0862982	4.6758	2.92807e-06	3.56774e-05	LHFPL2	lipoma HMGIC fusion partner-like 2 [Source:HGNC Symbol;Acc:HGNC:6588]	828.613	1046.36	838.611	1212.53	868.028	1118.76	lipoma HMGIC fusion partner-like 2 [Source:HGNC Symbol;Acc:HGNC:6588]
ENSG00000125864	103.365	0.893022	0.191043	4.67445	2.9474e-06	3.58847e-05	BFSP1	beaded filament structural protein 1 [Source:HGNC Symbol;Acc:HGNC:1040]	72.8942	128.101	76.2929	157.265	48.6972	136.938	beaded filament structural protein 1 [Source:HGNC Symbol;Acc:HGNC:1040]
ENSG00000126522	493.279	0.644233	0.137938	4.67046	3.00527e-06	3.65606e-05	ASL	argininosuccinate lyase [Source:HGNC Symbol;Acc:HGNC:746]	414.307	478.883	332.637	713.389	382.273	638.183	argininosuccinate lyase [Source:HGNC Symbol;Acc:HGNC:746]
ENSG00000163479	2883.56	0.354768	0.0760093	4.66744	3.0498e-06	3.70733e-05	SSR2	signal sequence receptor subunit 2 [Source:HGNC Symbol;Acc:HGNC:11324]	2450.88	2987.03	2430.39	3400.57	2691.74	3340.77	signal sequence receptor subunit 2 [Source:HGNC Symbol;Acc:HGNC:11324]
ENSG00000138316	85.6525	0.881237	0.188915	4.66474	3.09006e-06	3.75332e-05	ADAMTS14	ADAM metallopeptidase with thrombospondin type 1 motif 14 [Source:HGNC Symbol;Acc:HGNC:14899]	53.5549	110.143	58.5929	112.82	54.7844	124.019	ADAM metallopeptidase with thrombospondin type 1 motif 14 [Source:HGNC Symbol;Acc:HGNC:14899]
ENSG00000145050	611.912	0.510999	0.109584	4.6631	3.11475e-06	3.78035e-05	MANF	mesencephalic astrocyte derived neurotrophic factor [Source:HGNC Symbol;Acc:HGNC:15461]	525.879	656.07	503.533	827.349	467.493	691.15	mesencephalic astrocyte derived neurotrophic factor [Source:HGNC Symbol;Acc:HGNC:15461]
ENSG00000155438	452.677	-0.481885	0.103344	-4.66294	3.11731e-06	3.7805e-05	NIFK	nucleolar protein interacting with the FHA domain of MKI67 [Source:HGNC Symbol;Acc:HGNC:17838]	526.623	383.107	548.698	368.091	516.19	373.35	nucleolar protein interacting with the FHA domain of MKI67 [Source:HGNC Symbol;Acc:HGNC:17838]
ENSG00000115839	1820.62	-0.37884	0.0812808	-4.66088	3.14857e-06	3.81543e-05	RAB3GAP1	RAB3 GTPase activating protein catalytic subunit 1 [Source:HGNC Symbol;Acc:HGNC:17063]	2004.59	1685.67	2062.35	1416.52	2126.85	1627.76	RAB3 GTPase activating protein catalytic subunit 1 [Source:HGNC Symbol;Acc:HGNC:17063]
ENSG00000149179	427.149	0.502604	0.107873	4.65921	3.17424e-06	3.84353e-05	C11orf49	chromosome 11 open reading frame 49 [Source:HGNC Symbol;Acc:HGNC:28720]	336.95	471.7	349.116	532.193	365.229	507.705	chromosome 11 open reading frame 49 [Source:HGNC Symbol;Acc:HGNC:28720]
ENSG00000152229	437.359	-0.606138	0.130138	-4.65765	3.19836e-06	3.86972e-05	PSTPIP2	proline-serine-threonine phosphatase interacting protein 2 [Source:HGNC Symbol;Acc:HGNC:9581]	514.722	375.923	493.157	276.923	596.541	366.891	proline-serine-threonine phosphatase interacting protein 2 [Source:HGNC Symbol;Acc:HGNC:9581]
ENSG00000065029	476.034	0.511848	0.109926	4.6563	3.21937e-06	3.8921e-05	ZNF76	zinc finger protein 76 [Source:HGNC Symbol;Acc:HGNC:13149]	424.72	541.138	374.14	609.686	365.229	541.293	zinc finger protein 76 [Source:HGNC Symbol;Acc:HGNC:13149]
ENSG00000175970	393.264	0.53258	0.114414	4.65485	3.24221e-06	3.91666e-05	UNC119B	unc-119 lipid binding chaperone B [Source:HGNC Symbol;Acc:HGNC:16488]	313.147	441.77	344.844	483.19	292.183	484.451	unc-119 lipid binding chaperone B [Source:HGNC Symbol;Acc:HGNC:16488]
ENSG00000114861	1327.59	-0.393534	0.0845501	-4.65445	3.24851e-06	3.92122e-05	FOXP1	forkhead box P1 [Source:HGNC Symbol;Acc:HGNC:3823]	1431.85	1230.73	1510.6	1062.11	1597.27	1132.97	forkhead box P1 [Source:HGNC Symbol;Acc:HGNC:3823]
ENSG00000163694	139.489	-0.769104	0.165351	-4.65133	3.29793e-06	3.97778e-05	RBM47	RNA binding motif protein 47 [Source:HGNC Symbol;Acc:HGNC:30358]	171.078	95.7766	167.844	96.866	203.311	102.058	RNA binding motif protein 47 [Source:HGNC Symbol;Acc:HGNC:30358]
ENSG00000112511	1171.61	0.465551	0.100111	4.65036	3.31354e-06	3.9904e-05	PHF1	PHD finger protein 1 [Source:HGNC Symbol;Acc:HGNC:8919]	1106.06	1296.58	980.211	1415.38	838.809	1392.63	PHD finger protein 1 [Source:HGNC Symbol;Acc:HGNC:8919]
ENSG00000077235	2793.41	0.314694	0.0676709	4.65036	3.31351e-06	3.9904e-05	GTF3C1	general transcription factor IIIC subunit 1 [Source:HGNC Symbol;Acc:HGNC:4664]	2582.54	2981.05	2484.71	3242.16	2383.73	3086.28	general transcription factor IIIC subunit 1 [Source:HGNC Symbol;Acc:HGNC:4664]
ENSG00000103145	695.942	0.439923	0.094634	4.64868	3.34065e-06	4.01993e-05	HCFC1R1	host cell factor C1 regulator 1 [Source:HGNC Symbol;Acc:HGNC:21198]	601.749	753.044	584.098	787.463	573.41	875.887	host cell factor C1 regulator 1 [Source:HGNC Symbol;Acc:HGNC:21198]
ENSG00000163545	955.426	-0.671682	0.14452	-4.64768	3.35683e-06	4.03626e-05	NUAK2	NUAK family kinase 2 [Source:HGNC Symbol;Acc:HGNC:29558]	1397.63	696.775	825.184	736.181	1361.09	715.695	NUAK family kinase 2 [Source:HGNC Symbol;Acc:HGNC:29558]
ENSG00000092330	1082.87	-0.383827	0.0826774	-4.64246	3.44278e-06	4.13641e-05	TINF2	TERF1 interacting nuclear factor 2 [Source:HGNC Symbol;Acc:HGNC:11824]	1240.69	899.103	1170.03	919.657	1280.74	986.988	TERF1 interacting nuclear factor 2 [Source:HGNC Symbol;Acc:HGNC:11824]
ENSG00000213222	124.41	-0.807781	0.174006	-4.64227	3.44602e-06	4.13709e-05	AC093724.2		179.26	87.3962	169.675	90.0284	140.004	80.0959
ENSG00000125534	1183.62	0.414285	0.0893046	4.63901	3.50075e-06	4.19955e-05	PPDPF	pancreatic progenitor cell differentiation and proliferation factor [Source:HGNC Symbol;Acc:HGNC:16142]	1052.5	1227.14	1029.04	1394.87	943.508	1454.64	pancreatic progenitor cell differentiation and proliferation factor [Source:HGNC Symbol;Acc:HGNC:16142]
ENSG00000152620	427.574	0.549389	0.118489	4.63664	3.5411e-06	4.24467e-05	NADK2	NAD kinase 2, mitochondrial [Source:HGNC Symbol;Acc:HGNC:26404]	343.644	535.152	380.854	532.193	299.488	474.116	NAD kinase 2, mitochondrial [Source:HGNC Symbol;Acc:HGNC:26404]
ENSG00000011638	1182.62	-0.415099	0.0895706	-4.63433	3.581e-06	4.28917e-05	TMEM159	transmembrane protein 159 [Source:HGNC Symbol;Acc:HGNC:30136]	1353	1012.84	1226.18	1006.27	1496.22	1001.2	transmembrane protein 159 [Source:HGNC Symbol;Acc:HGNC:30136]
ENSG00000157216	1102.82	-0.42242	0.0911702	-4.63331	3.59862e-06	4.30696e-05	SSBP3	single stranded DNA binding protein 3 [Source:HGNC Symbol;Acc:HGNC:15674]	1247.38	957.766	1212.75	841.025	1346.48	1011.53	single stranded DNA binding protein 3 [Source:HGNC Symbol;Acc:HGNC:15674]
ENSG00000164024	650.182	-0.426962	0.092212	-4.63022	3.6528e-06	4.36843e-05	METAP1	methionyl aminopeptidase 1 [Source:HGNC Symbol;Acc:HGNC:15789]	733.404	567.477	743.398	524.216	770.633	561.963	methionyl aminopeptidase 1 [Source:HGNC Symbol;Acc:HGNC:15789]
ENSG00000142875	911.147	0.463723	0.100374	4.61993	3.83866e-06	4.58717e-05	PRKACB	protein kinase cAMP-activated catalytic subunit beta [Source:HGNC Symbol;Acc:HGNC:9381]	729.685	1157.7	850.208	1018.8	696.37	1014.12	protein kinase cAMP-activated catalytic subunit beta [Source:HGNC Symbol;Acc:HGNC:9381]
ENSG00000155760	3588.49	-0.293867	0.0636213	-4.61901	3.85578e-06	4.60408e-05	FZD7	frizzled class receptor 7 [Source:HGNC Symbol;Acc:HGNC:4045]	3841.08	3254.01	3886.05	3124.78	4151.44	3273.6	frizzled class receptor 7 [Source:HGNC Symbol;Acc:HGNC:4045]
ENSG00000152291	6016.03	0.28227	0.061127	4.61777	3.87895e-06	4.62818e-05	TGOLN2	trans-golgi network protein 2 [Source:HGNC Symbol;Acc:HGNC:15450]	5645.58	6660.07	5460.74	6435.32	5150.95	6743.56	trans-golgi network protein 2 [Source:HGNC Symbol;Acc:HGNC:15450]
ENSG00000147526	2123.76	0.325727	0.0706789	4.60856	4.05474e-06	4.83421e-05	TACC1	transforming acidic coiled-coil containing protein 1 [Source:HGNC Symbol;Acc:HGNC:11522]	1861.03	2505.76	1943.33	2320.22	1834.67	2277.57	transforming acidic coiled-coil containing protein 1 [Source:HGNC Symbol;Acc:HGNC:11522]
ENSG00000168497	5282.48	-0.325625	0.0706635	-4.60811	4.06344e-06	4.84086e-05	SDPR	serum deprivation response [Source:HGNC Symbol;Acc:HGNC:10690]	5686.49	4730.17	6173.62	4325.92	5799.84	4978.86	serum deprivation response [Source:HGNC Symbol;Acc:HGNC:10690]
ENSG00000041982	9430.54	0.432898	0.0939933	4.60563	4.11225e-06	4.88775e-05	TNC	tenascin C [Source:HGNC Symbol;Acc:HGNC:5318]	9073.09	10728.2	7877.7	11978.3	6974.66	9951.27	tenascin C [Source:HGNC Symbol;Acc:HGNC:5318]
ENSG00000120694	3875.56	0.317493	0.0689349	4.6057	4.11075e-06	4.88775e-05	HSPH1	heat shock protein family H (Hsp110) member 1 [Source:HGNC Symbol;Acc:HGNC:16969]	3497.43	4240.51	3643.75	4407.97	3181.15	4282.55	heat shock protein family H (Hsp110) member 1 [Source:HGNC Symbol;Acc:HGNC:16969]
ENSG00000100422	720.094	0.458379	0.0995236	4.60573	4.11012e-06	4.88775e-05	CERK	ceramide kinase [Source:HGNC Symbol;Acc:HGNC:19256]	574.227	851.215	556.633	818.233	680.543	839.715	ceramide kinase [Source:HGNC Symbol;Acc:HGNC:19256]
ENSG00000065427	2324.28	-0.341808	0.074228	-4.60484	4.12777e-06	4.90243e-05	KARS	lysyl-tRNA synthetase [Source:HGNC Symbol;Acc:HGNC:6215]	2500.72	2028.07	2493.25	2001.14	2823.22	2099.29	lysyl-tRNA synthetase [Source:HGNC Symbol;Acc:HGNC:6215]
ENSG00000138821	377.501	-0.629921	0.136942	-4.59992	4.22653e-06	5.0159e-05	SLC39A8	solute carrier family 39 member 8 [Source:HGNC Symbol;Acc:HGNC:20862]	467.861	287.33	379.023	286.04	551.496	293.254	solute carrier family 39 member 8 [Source:HGNC Symbol;Acc:HGNC:20862]
ENSG00000145365	174.198	-0.707293	0.153869	-4.59673	4.29176e-06	5.08633e-05	TIFA	TRAF interacting protein with forkhead associated domain [Source:HGNC Symbol;Acc:HGNC:19075]	203.062	117.326	213.62	132.194	245.921	133.063	TRAF interacting protein with forkhead associated domain [Source:HGNC Symbol;Acc:HGNC:19075]
ENSG00000155252	1350.19	-0.343862	0.0748063	-4.5967	4.29244e-06	5.08633e-05	PI4K2A	phosphatidylinositol 4-kinase type 2 alpha [Source:HGNC Symbol;Acc:HGNC:30031]	1579.13	1197.21	1489.85	1206.84	1471.87	1156.22	phosphatidylinositol 4-kinase type 2 alpha [Source:HGNC Symbol;Acc:HGNC:30031]
ENSG00000198938	16689.3	0.350542	0.0762899	4.59487	4.33016e-06	5.12711e-05	MT-CO3	mitochondrially encoded cytochrome c oxidase III [Source:HGNC Symbol;Acc:HGNC:7422]	15356.1	17730.6	13282.9	20303.1	15242.2	18220.5	mitochondrially encoded cytochrome c oxidase III [Source:HGNC Symbol;Acc:HGNC:7422]
ENSG00000143390	1548.83	-0.405272	0.088216	-4.59408	4.34662e-06	5.14049e-05	RFX5	regulatory factor X5 [Source:HGNC Symbol;Acc:HGNC:9986]	1830.54	1406.72	1759.62	1160.11	1722.66	1413.3	regulatory factor X5 [Source:HGNC Symbol;Acc:HGNC:9986]
ENSG00000072803	1575.2	-0.3268	0.0711362	-4.59401	4.34809e-06	5.14049e-05	FBXW11	F-box and WD repeat domain containing 11 [Source:HGNC Symbol;Acc:HGNC:13607]	1754.67	1452.21	1729.71	1361.82	1785.97	1366.8	F-box and WD repeat domain containing 11 [Source:HGNC Symbol;Acc:HGNC:13607]
ENSG00000166747	2522.67	-0.331129	0.0721075	-4.59215	4.38702e-06	5.18256e-05	AP1G1	adaptor related protein complex 1 gamma 1 subunit [Source:HGNC Symbol;Acc:HGNC:555]	2772.95	2353.71	2946.13	2092.31	2728.26	2242.68	adaptor related protein complex 1 gamma 1 subunit [Source:HGNC Symbol;Acc:HGNC:555]
ENSG00000107821	279.559	0.680085	0.148268	4.58686	4.49952e-06	5.31142e-05	KAZALD1	Kazal type serine peptidase inhibitor domain 1 [Source:HGNC Symbol;Acc:HGNC:25460]	230.584	283.738	208.737	411.395	185.049	357.848	Kazal type serine peptidase inhibitor domain 1 [Source:HGNC Symbol;Acc:HGNC:25460]
ENSG00000141448	65.2412	-0.989572	0.215756	-4.58652	4.50692e-06	5.31611e-05	GATA6	GATA binding protein 6 [Source:HGNC Symbol;Acc:HGNC:4174]	103.391	43.0995	75.0722	36.4672	99.8293	33.5886	GATA binding protein 6 [Source:HGNC Symbol;Acc:HGNC:4174]
ENSG00000165821	131.129	0.758636	0.165429	4.58587	4.52089e-06	5.32854e-05	SALL2	spalt like transcription factor 2 [Source:HGNC Symbol;Acc:HGNC:10526]	103.391	159.229	89.1101	175.498	86.4375	173.11	spalt like transcription factor 2 [Source:HGNC Symbol;Acc:HGNC:10526]
ENSG00000151458	779.755	0.422639	0.0921719	4.58533	4.53271e-06	5.33841e-05	ANKRD50	ankyrin repeat domain 50 [Source:HGNC Symbol;Acc:HGNC:29223]	650.097	974.527	670.767	886.609	667.152	829.38	ankyrin repeat domain 50 [Source:HGNC Symbol;Acc:HGNC:29223]
ENSG00000100099	826.311	0.387779	0.0846303	4.58203	4.60474e-06	5.41913e-05	HPS4	HPS4, biogenesis of lysosomal organelles complex 3 subunit 2 [Source:HGNC Symbol;Acc:HGNC:15844]	702.164	952.977	691.519	941.309	747.502	922.395	HPS4, biogenesis of lysosomal organelles complex 3 subunit 2 [Source:HGNC Symbol;Acc:HGNC:15844]
ENSG00000113916	1607.34	-0.421855	0.0920803	-4.58138	4.61921e-06	5.43204e-05	BCL6	B-cell CLL/lymphoma 6 [Source:HGNC Symbol;Acc:HGNC:1001]	2042.52	1423.48	1866.43	1278.63	1632.57	1400.39	B-cell CLL/lymphoma 6 [Source:HGNC Symbol;Acc:HGNC:1001]
ENSG00000064932	3301.52	-0.338527	0.0739203	-4.57962	4.65826e-06	5.47381e-05	SBNO2	strawberry notch homolog 2 [Source:HGNC Symbol;Acc:HGNC:29158]	4030.01	2827.8	3597.97	2942.45	3455.07	2955.8	strawberry notch homolog 2 [Source:HGNC Symbol;Acc:HGNC:29158]
ENSG00000143514	1114.77	-0.399205	0.087194	-4.57835	4.68662e-06	5.50297e-05	TP53BP2	tumor protein p53 binding protein 2 [Source:HGNC Symbol;Acc:HGNC:12000]	1367.88	902.695	1265.24	972.079	1182.12	998.615	tumor protein p53 binding protein 2 [Source:HGNC Symbol;Acc:HGNC:12000]
ENSG00000164924	5690.29	-0.288018	0.0629168	-4.57776	4.69985e-06	5.51433e-05	YWHAZ	tyrosine 3-monooxygenase/tryptophan 5-monooxygenase activation protein zeta [Source:HGNC Symbol;Acc:HGNC:12855]	5928.23	5155.18	6304.23	4973.21	6565.6	5215.28	tyrosine 3-monooxygenase/tryptophan 5-monooxygenase activation protein zeta [Source:HGNC Symbol;Acc:HGNC:12855]
ENSG00000173210	2497.44	0.421015	0.0919742	4.57754	4.7048e-06	5.51597e-05	ABLIM3	actin binding LIM protein family member 3 [Source:HGNC Symbol;Acc:HGNC:29132]	2281.29	2583.57	2220.43	3008.54	1862.67	3028.14	actin binding LIM protein family member 3 [Source:HGNC Symbol;Acc:HGNC:29132]
ENSG00000125977	1260.88	-0.339969	0.0742872	-4.57641	4.73016e-06	5.5415e-05	EIF2S2	eukaryotic translation initiation factor 2 subunit beta [Source:HGNC Symbol;Acc:HGNC:3266]	1431.85	1142.14	1408.06	1075.78	1395.17	1112.3	eukaryotic translation initiation factor 2 subunit beta [Source:HGNC Symbol;Acc:HGNC:3266]
ENSG00000121068	5664.28	0.871009	0.1904	4.57462	4.77081e-06	5.5849e-05	TBX2	T-box 2 [Source:HGNC Symbol;Acc:HGNC:11597]	4524.64	6299.71	3593.09	8996	2986.36	7585.86	T-box 2 [Source:HGNC Symbol;Acc:HGNC:11597]
ENSG00000169085	67.0896	-0.961529	0.210218	-4.57396	4.78595e-06	5.59841e-05	C8orf46	chromosome 8 open reading frame 46 [Source:HGNC Symbol;Acc:HGNC:28498]	89.2582	47.8883	92.1618	39.886	101.047	32.2967	chromosome 8 open reading frame 46 [Source:HGNC Symbol;Acc:HGNC:28498]
ENSG00000135766	1203.75	-0.362657	0.0792986	-4.57331	4.80085e-06	5.60475e-05	EGLN1	egl-9 family hypoxia inducible factor 1 [Source:HGNC Symbol;Acc:HGNC:1232]	1333.67	1061.92	1301.25	1059.83	1442.65	1023.16	egl-9 family hypoxia inducible factor 1 [Source:HGNC Symbol;Acc:HGNC:1232]
ENSG00000030582	12684.5	-0.31541	0.0689684	-4.57325	4.80221e-06	5.60475e-05	GRN	granulin precursor [Source:HGNC Symbol;Acc:HGNC:4601]	14997.6	10555.8	13588.1	12009.1	13687.6	11269	granulin precursor [Source:HGNC Symbol;Acc:HGNC:4601]
ENSG00000128394	558.355	-0.536033	0.117205	-4.57347	4.79712e-06	5.60475e-05	APOBEC3F	apolipoprotein B mRNA editing enzyme catalytic subunit 3F [Source:HGNC Symbol;Acc:HGNC:17356]	650.097	500.433	672.598	366.951	676.891	483.159	apolipoprotein B mRNA editing enzyme catalytic subunit 3F [Source:HGNC Symbol;Acc:HGNC:17356]
ENSG00000114346	1558.68	-0.355878	0.077869	-4.57021	4.8723e-06	5.68227e-05	ECT2	epithelial cell transforming 2 [Source:HGNC Symbol;Acc:HGNC:3155]	1661.69	1437.85	1751.68	1327.63	1852.93	1320.29	epithelial cell transforming 2 [Source:HGNC Symbol;Acc:HGNC:3155]
ENSG00000138646	4803.91	-0.425892	0.0932058	-4.56937	4.89197e-06	5.69839e-05	HERC5	HECT and RLD domain containing E3 ubiquitin protein ligase 5 [Source:HGNC Symbol;Acc:HGNC:24368]	5350.28	4393.75	5306.93	3431.33	5941.06	4400.11	HECT and RLD domain containing E3 ubiquitin protein ligase 5 [Source:HGNC Symbol;Acc:HGNC:24368]
ENSG00000104765	2522.8	-0.322188	0.0705114	-4.5693	4.89346e-06	5.69839e-05	BNIP3L	BCL2 interacting protein 3 like [Source:HGNC Symbol;Acc:HGNC:1085]	2782.62	2305.82	2673.3	2150.42	2974.18	2250.44	BCL2 interacting protein 3 like [Source:HGNC Symbol;Acc:HGNC:1085]
ENSG00000261655	185.954	0.652335	0.142846	4.56669	4.95492e-06	5.76562e-05	CTD-3064M3.3		139.094	225.075	139.158	223.362	144.874	244.163
ENSG00000205476	729.08	0.451339	0.0988451	4.56612	4.96827e-06	5.77682e-05	CCDC85C	coiled-coil domain containing 85C [Source:HGNC Symbol;Acc:HGNC:35459]	679.106	854.806	600.577	821.651	551.496	866.844	coiled-coil domain containing 85C [Source:HGNC Symbol;Acc:HGNC:35459]
ENSG00000160445	1253.45	0.33344	0.073064	4.56367	5.02676e-06	5.84045e-05	ZER1	zyg-11 related cell cycle regulator [Source:HGNC Symbol;Acc:HGNC:30960]	1118.7	1412.71	1102.89	1418.8	1096.9	1370.67	zyg-11 related cell cycle regulator [Source:HGNC Symbol;Acc:HGNC:30960]
ENSG00000163349	2005.04	0.332777	0.0729775	4.55999	5.11549e-06	5.93466e-05	HIPK1	homeodomain interacting protein kinase 1 [Source:HGNC Symbol;Acc:HGNC:19006]	1828.3	2214.83	1823.09	2178.91	1653.27	2331.82	homeodomain interacting protein kinase 1 [Source:HGNC Symbol;Acc:HGNC:19006]
ENSG00000186417	209.849	-0.657109	0.144103	-4.56	5.11547e-06	5.93466e-05	GLDN	gliomedin [Source:HGNC Symbol;Acc:HGNC:29514]	248.435	170.004	282.589	165.242	252.008	140.814	gliomedin [Source:HGNC Symbol;Acc:HGNC:29514]
ENSG00000136816	1029.02	-0.359174	0.0787936	-4.55842	5.15408e-06	5.97496e-05	TOR1B	torsin family 1 member B [Source:HGNC Symbol;Acc:HGNC:11995]	1200.52	905.089	1137.07	898.005	1140.73	892.682	torsin family 1 member B [Source:HGNC Symbol;Acc:HGNC:11995]
ENSG00000189266	1385.63	-0.347227	0.0761967	-4.55698	5.18932e-06	6.01132e-05	PNRC2	proline rich nuclear receptor coactivator 2 [Source:HGNC Symbol;Acc:HGNC:23158]	1512.18	1234.32	1506.33	1193.16	1650.84	1216.94	proline rich nuclear receptor coactivator 2 [Source:HGNC Symbol;Acc:HGNC:23158]
ENSG00000185650	8331.02	0.348333	0.0764478	4.55649	5.20161e-06	6.02106e-05	ZFP36L1	ZFP36 ring finger protein like 1 [Source:HGNC Symbol;Acc:HGNC:1107]	7915.71	9119.13	6546.54	9143.01	7461.63	9800.12	ZFP36 ring finger protein like 1 [Source:HGNC Symbol;Acc:HGNC:1107]
ENSG00000136436	2196.74	-0.356842	0.0783793	-4.55276	5.29468e-06	6.12421e-05	CALCOCO2	calcium binding and coiled-coil domain 2 [Source:HGNC Symbol;Acc:HGNC:29912]	2499.97	2058	2378.51	1743.59	2543.21	1957.18	calcium binding and coiled-coil domain 2 [Source:HGNC Symbol;Acc:HGNC:29912]
ENSG00000198160	1621.72	-0.367092	0.0806593	-4.55115	5.33543e-06	6.16676e-05	MIER1	MIER1 transcriptional regulator [Source:HGNC Symbol;Acc:HGNC:29657]	1696.65	1417.49	1858.49	1336.75	1943.02	1477.9	MIER1 transcriptional regulator [Source:HGNC Symbol;Acc:HGNC:29657]
ENSG00000113648	2442.56	0.32249	0.0708972	4.5487	5.3979e-06	6.23431e-05	H2AFY	H2A histone family member Y [Source:HGNC Symbol;Acc:HGNC:4740]	2221.04	2625.48	2250.94	2756.69	2018.5	2782.69	H2A histone family member Y [Source:HGNC Symbol;Acc:HGNC:4740]
ENSG00000084764	495.192	0.471765	0.103753	4.54702	5.44121e-06	6.27966e-05	MAPRE3	microtubule associated protein RP/EB family member 3 [Source:HGNC Symbol;Acc:HGNC:6892]	439.596	557.899	412.592	596.011	379.838	585.217	microtubule associated protein RP/EB family member 3 [Source:HGNC Symbol;Acc:HGNC:6892]
ENSG00000162522	522.488	0.498727	0.10971	4.54588	5.4705e-06	6.30877e-05	KIAA1522	KIAA1522 [Source:HGNC Symbol;Acc:HGNC:29301]	473.812	578.251	406.488	601.709	404.187	670.48	KIAA1522 [Source:HGNC Symbol;Acc:HGNC:29301]
ENSG00000116273	455.684	0.497835	0.109646	4.5404	5.61473e-06	6.47028e-05	PHF13	PHD finger protein 13 [Source:HGNC Symbol;Acc:HGNC:22983]	371.909	504.025	347.285	534.472	405.404	571.006	PHD finger protein 13 [Source:HGNC Symbol;Acc:HGNC:22983]
ENSG00000242125	363.726	0.550784	0.121318	4.53999	5.62582e-06	6.47825e-05	SNHG3	small nucleolar RNA host gene 3 [Source:HGNC Symbol;Acc:HGNC:10118]	259.592	435.784	306.392	469.515	308.01	403.063	small nucleolar RNA host gene 3 [Source:HGNC Symbol;Acc:HGNC:10118]
ENSG00000132563	178.946	0.662595	0.145962	4.5395	5.63883e-06	6.48842e-05	REEP2	receptor accessory protein 2 [Source:HGNC Symbol;Acc:HGNC:17975]	142.069	209.511	130.613	231.339	131.482	228.661	receptor accessory protein 2 [Source:HGNC Symbol;Acc:HGNC:17975]
ENSG00000197565	667.558	0.532127	0.117236	4.53892	5.65427e-06	6.50137e-05	COL4A6	collagen type IV alpha 6 chain [Source:HGNC Symbol;Acc:HGNC:2208]	606.955	784.171	562.736	745.298	441.927	864.26	collagen type IV alpha 6 chain [Source:HGNC Symbol;Acc:HGNC:2208]
ENSG00000130508	22675.1	0.344913	0.0760106	4.5377	5.68719e-06	6.5247e-05	PXDN	peroxidasin [Source:HGNC Symbol;Acc:HGNC:14966]	21904	24517.6	19952.1	26525.3	17886.5	25265.1	peroxidasin [Source:HGNC Symbol;Acc:HGNC:14966]
ENSG00000170522	999.689	-0.383463	0.0845031	-4.53785	5.68306e-06	6.5247e-05	ELOVL6	ELOVL fatty acid elongase 6 [Source:HGNC Symbol;Acc:HGNC:15829]	1099.36	908.681	1188.95	868.375	1117.6	815.169	ELOVL fatty acid elongase 6 [Source:HGNC Symbol;Acc:HGNC:15829]
ENSG00000204264	3108.6	-0.281865	0.062116	-4.53773	5.6863e-06	6.5247e-05	PSMB8	proteasome subunit beta 8 [Source:HGNC Symbol;Acc:HGNC:9545]	3375.45	2825.41	3330.03	2756.69	3545.16	2818.86	proteasome subunit beta 8 [Source:HGNC Symbol;Acc:HGNC:9545]
ENSG00000050130	1365.27	-0.366864	0.0809028	-4.53463	5.77041e-06	6.61529e-05	JKAMP	JNK1/MAPK8-associated membrane protein [Source:HGNC Symbol;Acc:HGNC:20184]	1457.14	1175.66	1503.88	1219.37	1670.31	1165.27	JNK1/MAPK8-associated membrane protein [Source:HGNC Symbol;Acc:HGNC:20184]
ENSG00000114270	16067.4	0.826186	0.182295	4.53214	5.83878e-06	6.68872e-05	COL7A1	collagen type VII alpha 1 chain [Source:HGNC Symbol;Acc:HGNC:2214]	13366.4	18730.3	10953.2	22755.5	8263.92	22335.1	collagen type VII alpha 1 chain [Source:HGNC Symbol;Acc:HGNC:2214]
ENSG00000156162	968.676	-0.420698	0.0928787	-4.52955	5.91105e-06	6.76651e-05	DPY19L4	dpy-19 like 4 (C. elegans) [Source:HGNC Symbol;Acc:HGNC:27829]	1019.03	879.948	1159.04	764.671	1163.86	825.504	dpy-19 like 4 (C. elegans) [Source:HGNC Symbol;Acc:HGNC:27829]
ENSG00000108515	104.958	0.794761	0.17554	4.52753	5.96759e-06	6.82621e-05	ENO3	enolase 3 [Source:HGNC Symbol;Acc:HGNC:3354]	73.638	143.665	70.1894	131.054	74.2632	136.938	enolase 3 [Source:HGNC Symbol;Acc:HGNC:3354]
ENSG00000119938	261.088	0.685633	0.151471	4.52651	5.99671e-06	6.85446e-05	PPP1R3C	protein phosphatase 1 regulatory subunit 3C [Source:HGNC Symbol;Acc:HGNC:9293]	191.905	378.318	174.558	344.159	217.92	259.666	protein phosphatase 1 regulatory subunit 3C [Source:HGNC Symbol;Acc:HGNC:9293]
ENSG00000026508	53567.4	-0.268336	0.0592907	-4.52578	6.01738e-06	6.87302e-05	CD44	CD44 molecule (Indian blood group) [Source:HGNC Symbol;Acc:HGNC:1681]	59190.8	47879.9	60742.5	50790.8	55870.3	46929.7	CD44 molecule (Indian blood group) [Source:HGNC Symbol;Acc:HGNC:1681]
ENSG00000123983	5346.14	-0.294985	0.0651813	-4.5256	6.02236e-06	6.87365e-05	ACSL3	acyl-CoA synthetase long-chain family member 3 [Source:HGNC Symbol;Acc:HGNC:3570]	5618.8	4958.83	5944.13	4541.3	6138.28	4875.51	acyl-CoA synthetase long-chain family member 3 [Source:HGNC Symbol;Acc:HGNC:3570]
ENSG00000165272	117.792	0.780496	0.172477	4.52523	6.03301e-06	6.88074e-05	AQP3	aquaporin 3 (Gill blood group) [Source:HGNC Symbol;Acc:HGNC:636]	89.2582	150.848	72.0205	149.288	86.4375	158.9	aquaporin 3 (Gill blood group) [Source:HGNC Symbol;Acc:HGNC:636]
ENSG00000114302	744.899	0.432895	0.095761	4.52058	6.16715e-06	7.0234e-05	PRKAR2A	protein kinase cAMP-dependent type II regulatory subunit alpha [Source:HGNC Symbol;Acc:HGNC:9391]	635.964	863.187	684.194	867.235	564.888	853.925	protein kinase cAMP-dependent type II regulatory subunit alpha [Source:HGNC Symbol;Acc:HGNC:9391]
ENSG00000140265	598.247	0.452577	0.100114	4.5206	6.1665e-06	7.0234e-05	ZSCAN29	zinc finger and SCAN domain containing 29 [Source:HGNC Symbol;Acc:HGNC:26673]	475.3	743.466	532.219	651.851	495.494	691.15	zinc finger and SCAN domain containing 29 [Source:HGNC Symbol;Acc:HGNC:26673]
ENSG00000169946	742.679	-0.4387	0.0970534	-4.5202	6.17826e-06	7.03088e-05	ZFPM2	zinc finger protein, FOG family member 2 [Source:HGNC Symbol;Acc:HGNC:16700]	865.06	640.506	786.732	591.452	927.682	644.643	zinc finger protein, FOG family member 2 [Source:HGNC Symbol;Acc:HGNC:16700]
ENSG00000176871	1670.76	-0.350466	0.0775365	-4.52002	6.18341e-06	7.03158e-05	WSB2	WD repeat and SOCS box containing 2 [Source:HGNC Symbol;Acc:HGNC:19222]	1866.24	1418.69	1868.87	1593.16	1899.19	1378.42	WD repeat and SOCS box containing 2 [Source:HGNC Symbol;Acc:HGNC:19222]
ENSG00000122783	679.669	-0.51869	0.114821	-4.51739	6.26079e-06	7.11437e-05	C7orf49	chromosome 7 open reading frame 49 [Source:HGNC Symbol;Acc:HGNC:22432]	908.202	592.618	834.339	531.053	675.674	536.126	chromosome 7 open reading frame 49 [Source:HGNC Symbol;Acc:HGNC:22432]
ENSG00000181458	659.524	0.415349	0.0920082	4.51426	6.35382e-06	7.21479e-05	TMEM45A	transmembrane protein 45A [Source:HGNC Symbol;Acc:HGNC:25480]	563.814	768.607	542.595	780.626	581.932	719.571	transmembrane protein 45A [Source:HGNC Symbol;Acc:HGNC:25480]
ENSG00000261324	128.469	0.799707	0.177203	4.51294	6.3935e-06	7.25454e-05	RP11-174G6.5		79.5885	187.962	81.786	142.45	105.916	173.11
ENSG00000169169	932.425	0.448019	0.0993102	4.51131	6.44277e-06	7.3051e-05	CPT1C	carnitine palmitoyltransferase 1C [Source:HGNC Symbol;Acc:HGNC:18540]	830.101	962.555	808.094	1141.88	707.327	1144.6	carnitine palmitoyltransferase 1C [Source:HGNC Symbol;Acc:HGNC:18540]
ENSG00000149930	1989.06	0.358618	0.0795061	4.51057	6.46535e-06	7.32536e-05	TAOK2	TAO kinase 2 [Source:HGNC Symbol;Acc:HGNC:16835]	1836.49	2168.14	1804.17	2304.27	1564.4	2256.9	TAO kinase 2 [Source:HGNC Symbol;Acc:HGNC:16835]
ENSG00000054267	1935.47	-0.400833	0.0889682	-4.50535	6.62643e-06	7.50238e-05	ARID4B	AT-rich interaction domain 4B [Source:HGNC Symbol;Acc:HGNC:15550]	2221.04	1876.02	2329.07	1533.9	2080.59	1572.2	AT-rich interaction domain 4B [Source:HGNC Symbol;Acc:HGNC:15550]
ENSG00000213024	1392.25	-0.370554	0.0822751	-4.50384	6.67379e-06	7.54498e-05	NUP62	nucleoporin 62 [Source:HGNC Symbol;Acc:HGNC:8066]	1576.15	1194.81	1490.46	1293.45	1661.79	1136.84	nucleoporin 62 [Source:HGNC Symbol;Acc:HGNC:8066]
ENSG00000159110	382.094	-0.510504	0.113348	-4.50385	6.67328e-06	7.54498e-05	IFNAR2	interferon alpha and beta receptor subunit 2 [Source:HGNC Symbol;Acc:HGNC:5433]	476.043	296.908	433.954	332.763	448.014	304.881	interferon alpha and beta receptor subunit 2 [Source:HGNC Symbol;Acc:HGNC:5433]
ENSG00000221887	129.133	-0.795	0.176528	-4.50354	6.68298e-06	7.54987e-05	HMSD	histocompatibility minor serpin domain containing [Source:HGNC Symbol;Acc:HGNC:23037]	159.177	92.185	155.027	74.074	193.571	100.766	histocompatibility minor serpin domain containing [Source:HGNC Symbol;Acc:HGNC:23037]
ENSG00000136819	722.117	0.43131	0.0957838	4.50296	6.7015e-06	7.56528e-05	C9orf78	chromosome 9 open reading frame 78 [Source:HGNC Symbol;Acc:HGNC:24932]	588.36	780.58	587.76	827.349	659.847	888.806	chromosome 9 open reading frame 78 [Source:HGNC Symbol;Acc:HGNC:24932]
ENSG00000198715	1031.63	0.39871	0.0885911	4.50057	6.77729e-06	7.64528e-05	GLMP	glycosylated lysosomal membrane protein [Source:HGNC Symbol;Acc:HGNC:29436]	891.094	1099.04	905.139	1296.86	859.506	1138.14	glycosylated lysosomal membrane protein [Source:HGNC Symbol;Acc:HGNC:29436]
ENSG00000171067	850.704	0.496914	0.110432	4.49972	6.80419e-06	7.67004e-05	C11orf24	chromosome 11 open reading frame 24 [Source:HGNC Symbol;Acc:HGNC:1174]	731.173	921.85	718.374	1180.63	644.021	908.184	chromosome 11 open reading frame 24 [Source:HGNC Symbol;Acc:HGNC:1174]
ENSG00000184271	181.875	0.67873	0.15086	4.49907	6.82511e-06	7.68803e-05	POU6F1	POU class 6 homeobox 1 [Source:HGNC Symbol;Acc:HGNC:9224]	151.739	219.089	133.055	218.803	120.526	248.039	POU class 6 homeobox 1 [Source:HGNC Symbol;Acc:HGNC:9224]
ENSG00000107833	181.222	0.707978	0.15743	4.49709	6.88884e-06	7.75419e-05	NPM3	nucleophosmin/nucleoplasmin 3 [Source:HGNC Symbol;Acc:HGNC:7931]	133.887	207.117	128.782	275.783	136.352	205.407	nucleophosmin/nucleoplasmin 3 [Source:HGNC Symbol;Acc:HGNC:7931]
ENSG00000108179	2021.38	-0.40397	0.089855	-4.49579	6.9311e-06	7.7961e-05	PPIF	peptidylprolyl isomerase F [Source:HGNC Symbol;Acc:HGNC:9259]	2444.19	1683.27	2241.79	1958.97	2249.81	1550.24	peptidylprolyl isomerase F [Source:HGNC Symbol;Acc:HGNC:9259]
ENSG00000179630	290.068	-0.541962	0.120708	-4.48985	7.12732e-06	8.01101e-05	LACC1	laccase domain containing 1 [Source:HGNC Symbol;Acc:HGNC:26789]	350.338	232.258	344.233	230.199	346.968	236.412	laccase domain containing 1 [Source:HGNC Symbol;Acc:HGNC:26789]
ENSG00000134108	2010.55	-0.361476	0.0805263	-4.48892	7.15866e-06	8.0404e-05	ARL8B	ADP ribosylation factor like GTPase 8B [Source:HGNC Symbol;Acc:HGNC:25564]	2054.43	1807.78	2308.93	1705.98	2442.16	1744.02	ADP ribosylation factor like GTPase 8B [Source:HGNC Symbol;Acc:HGNC:25564]
ENSG00000141497	47.4893	-1.02304	0.228014	-4.48675	7.2317e-06	8.11657e-05	ZMYND15	zinc finger MYND-type containing 15 [Source:HGNC Symbol;Acc:HGNC:20997]	68.4313	26.3386	62.255	22.792	76.6981	28.4211	zinc finger MYND-type containing 15 [Source:HGNC Symbol;Acc:HGNC:20997]
ENSG00000274211	265.082	0.57629	0.128447	4.48659	7.23735e-06	8.11703e-05	SOCS7	suppressor of cytokine signaling 7 [Source:HGNC Symbol;Acc:HGNC:29846]	194.136	341.204	220.334	306.552	213.05	315.216	suppressor of cytokine signaling 7 [Source:HGNC Symbol;Acc:HGNC:29846]
ENSG00000088543	334.072	0.537619	0.119887	4.48437	7.31306e-06	8.19602e-05	C3orf18	chromosome 3 open reading frame 18 [Source:HGNC Symbol;Acc:HGNC:24837]	280.419	383.107	282.589	419.373	241.051	397.896	chromosome 3 open reading frame 18 [Source:HGNC Symbol;Acc:HGNC:24837]
ENSG00000149380	45.0092	1.02622	0.228942	4.48246	7.3787e-06	8.26332e-05	P4HA3	prolyl 4-hydroxylase subunit alpha 3 [Source:HGNC Symbol;Acc:HGNC:30135]	29.0089	59.8604	21.362	69.5156	23.1312	67.1772	prolyl 4-hydroxylase subunit alpha 3 [Source:HGNC Symbol;Acc:HGNC:30135]
ENSG00000033327	205.987	0.706396	0.157596	4.48231	7.38377e-06	8.26332e-05	GAB2	GRB2 associated binding protein 2 [Source:HGNC Symbol;Acc:HGNC:14458]	185.211	253.808	144.041	279.202	121.743	251.914	GRB2 associated binding protein 2 [Source:HGNC Symbol;Acc:HGNC:14458]
ENSG00000152556	1333.73	0.334994	0.0748049	4.47824	7.52622e-06	8.41667e-05	PFKM	phosphofructokinase, muscle [Source:HGNC Symbol;Acc:HGNC:8877]	1178.95	1427.07	1177.35	1563.53	1172.39	1483.07	phosphofructokinase, muscle [Source:HGNC Symbol;Acc:HGNC:8877]
ENSG00000131016	616.643	0.534894	0.119455	4.47779	7.54202e-06	8.42826e-05	AKAP12	A-kinase anchoring protein 12 [Source:HGNC Symbol;Acc:HGNC:370]	569.765	650.084	433.343	798.859	488.189	759.619	A-kinase anchoring protein 12 [Source:HGNC Symbol;Acc:HGNC:370]
ENSG00000254838	31.9193	-1.11171	0.248317	-4.477	7.56975e-06	8.45316e-05	GVINP1	GTPase, very large interferon inducible pseudogene 1 [Source:HGNC Symbol;Acc:HGNC:25813]	46.1167	20.3525	51.8791	9.1168	51.1321	12.9187	GTPase, very large interferon inducible pseudogene 1 [Source:HGNC Symbol;Acc:HGNC:25813]
ENSG00000134369	3807.27	0.390233	0.0873913	4.46536	7.99352e-06	8.90797e-05	NAV1	neuron navigator 1 [Source:HGNC Symbol;Acc:HGNC:15989]	3543.55	4150.72	3466.75	4295.15	2822	4565.47	neuron navigator 1 [Source:HGNC Symbol;Acc:HGNC:15989]
ENSG00000059728	344.367	-0.547931	0.122708	-4.46534	7.99426e-06	8.90797e-05	MXD1	MAX dimerization protein 1 [Source:HGNC Symbol;Acc:HGNC:6761]	460.423	282.541	390.009	282.621	388.36	262.249	MAX dimerization protein 1 [Source:HGNC Symbol;Acc:HGNC:6761]
ENSG00000170242	2626.3	-0.393781	0.0881854	-4.46537	7.99306e-06	8.90797e-05	USP47	ubiquitin specific peptidase 47 [Source:HGNC Symbol;Acc:HGNC:20076]	2828.74	2577.59	3052.32	2090.03	3100.79	2108.33	ubiquitin specific peptidase 47 [Source:HGNC Symbol;Acc:HGNC:20076]
ENSG00000110987	163.718	0.707027	0.158445	4.46229	8.10866e-06	9.02757e-05	BCL7A	BCL tumor suppressor 7A [Source:HGNC Symbol;Acc:HGNC:1004]	128.681	234.653	115.355	209.686	115.656	178.278	BCL tumor suppressor 7A [Source:HGNC Symbol;Acc:HGNC:1004]
ENSG00000196535	3538.28	0.350216	0.0784855	4.46217	8.11323e-06	9.02757e-05	MYO18A	myosin XVIIIA [Source:HGNC Symbol;Acc:HGNC:31104]	3379.16	4038.18	3153.64	3912.25	2762.35	3984.12	myosin XVIIIA [Source:HGNC Symbol;Acc:HGNC:31104]
ENSG00000171467	799.362	0.371386	0.0832888	4.45902	8.23361e-06	9.15495e-05	ZNF318	zinc finger protein 318 [Source:HGNC Symbol;Acc:HGNC:13578]	681.337	901.498	698.232	907.121	703.675	904.308	zinc finger protein 318 [Source:HGNC Symbol;Acc:HGNC:13578]
ENSG00000179632	1200.64	0.422245	0.0947247	4.4576	8.28811e-06	9.20895e-05	MAF1	MAF1 homolog, negative regulator of RNA polymerase III [Source:HGNC Symbol;Acc:HGNC:24966]	1096.39	1260.66	974.718	1546.44	988.553	1337.08	MAF1 homolog, negative regulator of RNA polymerase III [Source:HGNC Symbol;Acc:HGNC:24966]
ENSG00000182220	2559.27	-0.297736	0.0668635	-4.45289	8.47227e-06	9.40682e-05	ATP6AP2	ATPase H+ transporting accessory protein 2 [Source:HGNC Symbol;Acc:HGNC:18305]	2865.93	2336.95	2722.74	2191.45	2893.83	2344.74	ATPase H+ transporting accessory protein 2 [Source:HGNC Symbol;Acc:HGNC:18305]
ENSG00000196700	1536.83	0.356398	0.0800837	4.45032	8.57436e-06	9.51337e-05	ZNF512B	zinc finger protein 512B [Source:HGNC Symbol;Acc:HGNC:29212]	1453.42	1727.57	1339.7	1724.21	1232.04	1744.02	zinc finger protein 512B [Source:HGNC Symbol;Acc:HGNC:29212]
ENSG00000130024	1056.1	0.449506	0.101022	4.44958	8.60365e-06	9.53905e-05	PHF10	PHD finger protein 10 [Source:HGNC Symbol;Acc:HGNC:18250]	974.401	1202	763.539	1170.37	922.812	1303.5	PHD finger protein 10 [Source:HGNC Symbol;Acc:HGNC:18250]
ENSG00000137571	40.8863	-1.08923	0.244815	-4.44921	8.61853e-06	9.54871e-05	SLCO5A1	solute carrier organic anion transporter family member 5A1 [Source:HGNC Symbol;Acc:HGNC:19046]	60.2493	27.5358	54.9309	20.5128	73.0458	9.04308	solute carrier organic anion transporter family member 5A1 [Source:HGNC Symbol;Acc:HGNC:19046]
ENSG00000223768	128.754	0.767092	0.17243	4.44871	8.63893e-06	9.56449e-05	LINC00205	long intergenic non-protein coding RNA 205 [Source:HGNC Symbol;Acc:HGNC:16420]	92.2334	155.637	103.148	166.382	74.2632	180.862	long intergenic non-protein coding RNA 205 [Source:HGNC Symbol;Acc:HGNC:16420]
ENSG00000127314	631.75	-0.41773	0.0939948	-4.44418	8.82289e-06	9.76118e-05	RAP1B	RAP1B, member of RAS oncogene family [Source:HGNC Symbol;Acc:HGNC:9857]	705.883	548.321	704.336	536.751	769.416	525.791	RAP1B, member of RAS oncogene family [Source:HGNC Symbol;Acc:HGNC:9857]
ENSG00000161013	2937.2	0.435918	0.0981116	4.44308	8.86796e-06	9.80406e-05	MGAT4B	mannosyl (alpha-1,3-)-glycoprotein beta-1,4-N-acetylglucosaminyltransferase, isozyme B [Source:HGNC Symbol;Acc:HGNC:7048]	2618.24	2991.82	2533.53	3963.53	2285.12	3230.96	mannosyl (alpha-1,3-)-glycoprotein beta-1,4-N-acetylglucosaminyltransferase, isozyme B [Source:HGNC Symbol;Acc:HGNC:7048]
ENSG00000131725	749.43	-0.39557	0.0890486	-4.44218	8.90541e-06	9.83845e-05	WDR44	WD repeat domain 44 [Source:HGNC Symbol;Acc:HGNC:30512]	853.159	664.45	893.542	639.315	815.678	630.432	WD repeat domain 44 [Source:HGNC Symbol;Acc:HGNC:30512]
ENSG00000106070	675.363	0.414308	0.0933082	4.44021	8.98695e-06	9.92147e-05	GRB10	growth factor receptor bound protein 10 [Source:HGNC Symbol;Acc:HGNC:4564]	608.443	741.072	562.126	771.509	555.148	813.878	growth factor receptor bound protein 10 [Source:HGNC Symbol;Acc:HGNC:4564]
ENSG00000111961	2142.47	0.310626	0.0699679	4.43955	9.01455e-06	9.94486e-05	SASH1	SAM and SH3 domain containing 1 [Source:HGNC Symbol;Acc:HGNC:19182]	1959.96	2328.57	1921.97	2298.57	1839.54	2506.23	SAM and SH3 domain containing 1 [Source:HGNC Symbol;Acc:HGNC:19182]
ENSG00000184083	584.664	-0.443097	0.0998268	-4.43866	9.05193e-06	9.97336e-05	FAM120C	family with sequence similarity 120C [Source:HGNC Symbol;Acc:HGNC:16949]	710.346	530.363	654.288	462.677	667.152	483.159	family with sequence similarity 120C [Source:HGNC Symbol;Acc:HGNC:16949]
ENSG00000103335	7795.1	-0.279578	0.0629875	-4.43863	9.05325e-06	9.97336e-05	PIEZO1	piezo type mechanosensitive ion channel component 1 [Source:HGNC Symbol;Acc:HGNC:28993]	9006.15	6850.42	8604.61	7234.18	8064.26	7010.97	piezo type mechanosensitive ion channel component 1 [Source:HGNC Symbol;Acc:HGNC:28993]
[truncated: 63,809 more rows]

## Sheet: combinedresu_t24_erk3VSctrl
id	baseMean	log2FoldChange	lfcSE	stat	pvalue	padj	geneSymbol	description	siCntrl_t24_R1	siERK3_t24_R1	siCntrl_t24_R2	siERK3_t24_R2	siCntrl_t24_R3	siERK3_t24_R3	Description
[truncated: 65,217 more rows]
