# Supplementary material for: ERK3/MAPK6 controls IL-8 production and chemotaxis
Source: eLife journal article supplement (doi:10.7554/elife.52511), 2020-04-21
Supplement: supp [file elife-52511-supp-v1.zip › elife_poa_e52511_Figure_3_source_data_3.xlsx]

## Sheet: txm and secretome merged
txome.secretome	txome	secretome
BIRC3	CXCL10	2B4
TNFAIP6	IDO1	4-1BB
CTSS	GPR180	ACE
IL18BP	GCH1	ACPP
CRIM1	CCL5	Adipsin
GADD45A	OLR1	ALBUMIN
ICAM1	TNFSF18	IL-36RN
CD47	GBP5	Alpha 1 AG
TNFSF13B	CXCL11	A1BG
TLR3	SERPINB2	Alpha 1 Microglobulin
WISP1	NT5C3A	A2M
CFH	GBP1P1	TPM1
LIFR	RCAN1	ALPP
LGMN	UNC93B1	pro-MMP13
CD38	TRAF1	APN
THBS2	RND3	ApoA1
CXCL8	VSTM4	ApoA4
RET	COL3A1	ApoC2
CASP3	ANKRD1	ApoB100
FST	LGALS9	ApoE3
GFRA1	GBP4	ApoD
NRG1	GLIPR1	ApoM
CXCL16	ATP9A	ApoH
EDNRA	MESDC2	BAF57
CTGF	C1GALT1	BLAME
HGF	PTGS1	CA 15-3
IL6R	WARS	CA 19-9
DKK1	STARD4	Calreticulin
PTX3	NCOA7	CPN2
TNFRSF21	IL4I1	CBP
LUM	SHISA3	CD44
CEACAM1	CLDN11	CD45
GREM1	LAP3	CD46
FAS	EHD4	CD55
IGFBP4	DDAH1	CD59
BACE1	UGCG	CD90
CD74	ARNTL2	CD 79 alpha
SSTR2	EXOC3L4	Chymase
EPHB2	SSB	Factor XIII A
IL6	TNFSF10	Factor XIII B
TNF	EDNRB	C2
MICB	CREB3L1	C3a
CKB	MICAL2	C5/C5a
IFNB1	ISG20	C7
RIPK1	EZR	C8B
LAYN	CSF1	C9
SLC2A1	GANAB	COX-2
ADAM9	INSIG1	cTnT
IL7R	C3AR1	DBI
AXL	PIP5K1A	DCBLD2
GDNF	NUDCD1	DEFA1/3
FGFR1	ETS1	DPPIV
S100A6	TACR1	Endorphin Beta
FOXN3	RP11-166D19.1	Enolase 2
BMP4	COL5A3	EpCAM
TGFB1	MLKL	ERRa
MDK	OAS2	Erythropoietin R
FBLN5	GBP1	EXTL2
ANGPTL4	FAM84A	FABP1
IL20RB	AKR1C1	Fc RIIB/C
ALCAM	SMURF2	Fetuin A
CLU	TMEM35	FIH
CD14	BATF2	FoxO1
ANGPTL1	CNP	Galectin-3BP
CDH13	TMEM62	Gelsolin
PODXL	SLC5A3	GPI
MFGE8	MLXIP	GPR-39
ITGAV	CD274	GRP75
GLO1	MX2	GRP78
FGF5	CLDN1	GSR
FSTL1	FAM129A	Hemopexin
GPNMB	SC5D	HSP32
NES	IFIT3	Haptoglobin
TGFBR3	GMPR	HSP10
B2M	NFE2L3	HSP20
KLK10	TNS2	HSP40
MTUS1	MAT2B	HSPA8
APP	SLC16A1	HTRA2
MMP2	OTUD4	IBSP
FURIN	BLZF1	CD61
NBL1	IRF1	ITM2B
IL15RA	JUP	Kallikrein 6
IL12A	SLFN12	KCC3
IL1RAP	HMGCS1	pro-Glucagon
NRP2	RGCC	LIMPII
TNFRSF1B	IL1R1	LOX-1
DKK3	IKZF2	Marapsin
IL6ST	SCARB2	MINA
MMP15	HSH2D	NEP
FLT1	MANBA	Presenilin 2
VEGFB	RIPK2	NPTXR
BMPER	CHST14	Progesterone
IL7	IFIH1	Ntn1
BTC	DDX58	Omentin
FZD7	SDC1	Osteopontin
DCN	EFCC1	Pappalysin-1
NOV	WDFY1	PARK7
ADAMTS5	PNPT1	Visfatin
UBB	GABBR2	PI 16
FN1	HHEX	Plasminogen
MMP14	MSMO1	PON2
PDGFRA	VCAM1	PPARg2
PTGDR2	PHACTR4	NR3C3
SPARC	CACNB3	INSL3
FZD5	MAPK6	Thrombin
KAT2B	KANK2	PSP
CTSL	SLC23A2	PTN
EREG	USP25	RELM alpha
SAA1	ABCG2	SEMA3A
ANGPTL2	CACNA1I	Serpin A1
FGFR4	COL5A1	Serpin A4
NTF3	LDLR	Serpin A8
S100A4	PI4K2B	Serpin A9
TFRC	GBP3	Serpin B5
DLL1	RRAS2	Serpin D1
MUC16	TAP1	SERPING1
PSEN1	GAS6	SSTR5
CXCL5	TMX1	SPINK1
APOE	STARD5	SSEA-4
FAP	WFDC1	Syndecan-1
GDF5	SLC2A6	TACE
NPY	SCUBE1	Thrombomodulin
EGFR	OSTM1	TPA
IL34	CNDP2	Trappin-2
ACVR1B	DOPEY1	TROPONIN I
HSP90AA1	SCD	TRPM7
MSX1	PDZRN3	Uromodulin
IL12RB1	GNPDA1	VGF
TRADD	ETV7	Vitamin D-BP
CSF2	IFIT2	VWF
EPHB4	PARP12	ZAG
IL4R	NT5E	Activin C
KRT18	DAB2	Adiponectin / Acrp30
NUCB2	UAP1	AgRP
XIAP	IDI1	Angiogenin
CXCL1	MYD88	Angiopoietin-1
TIMP3	SPPL2A	Angiopoietin-2
SERTAD2	RGS2	Angiopoietin-like Factor
NPTX1	NAV3	AR (Amphiregulin)
SMAD1	TAP2	B7-1 /CD80
TNFSF15	TMEM119	Bax
FTL	IFI35	beta-NGF
BMPR2	SLC12A7	BLC / BCA-1 / CXCL13
BCAM	GLRX	BMP-5
F3	CD69	BMP-6
LYN	COL1A2	Cardiotrophin-1 / CT-1
DES	BIRC2	CCL28 / VIC
FYN	IFT27	CD27 / TNFRSF7
LTBR	SLC25A30	CD30 / TNFRSF8
CASP8	RP11-638I2.9	CD40 / TNFRSF5
INHBA	SLC25A28	CD40 Ligand / TNFSF5 /CD154
ENG	ADAM19	Cryptic
CCHCR1	SERPINH1	Csk
FZD1	RNF114	CTACK / CCL27
PPP2R5C	TPM4	CTLA-4 /CD152
THBS1	C3orf38	CXCR5 /BLR-1
FSTL3	MKNK2	Dtk
GAS1	DSP	EMAP-II
CSTB	ZDHHC18	Eotaxin / CCL11
CCND1	LGALS17A	Eotaxin-2 / MPIF-2
HSPD1	TDRD7	Eotaxin-3 / CCL26
ESM1	SDC2	Erythropoietin
PDGFA	TYMP	E-Selectin
S100A10	VAT1	Fas Ligand
FLT4	PLOD2	FGF Basic
IL13RA2	PML	FGF-7 / KGF
NTN4	TACC2	GCP-2 / CXCL6
IGFBP5	ATP2B1	GCSF
IGF2R	GABRE	GDF-15
IGFBP7	MB21D1	GITR Ligand / TNFSF18
KIF3B	TMEM50A	GRO
MMP3	PDZD2	HB-EGF
FGF13	PLIN2	HVEM / TNFRSF14
NOTCH1	HMGCR	IFN-alpha / beta R1
SART1	NUB1	IFN-alpha / beta R2
ICAM5	MRVI1	IGF-I
ACVR2B	SERPING1	IGF-I SR
FGF20	DHCR7	IGF-II
AGER	IFIT1	IL-1 alpha
PIM2	ZBP1	IL-1 beta
FABP3	FGF1	IL-1 F6 / FIL1 epsilon
KRT19	NEK7	IL-1 F7 / FIL1 zeta
CCR7	TNFAIP2	IL-1 F8 / FIL1 eta
BMPR1A	CAV2	IL-1 F9 / IL-1 H1
BNIP2	OLFML2A	IL-1 R4 / ST2
MMP1	IL32	IL-1 R8
CD24	PITPNM2	IL-1 R9
PDGFD	PAG1	IL-1 ra
MET	LRRTM2	IL-1 sRI
COL18A1	CDC73	IL-1 sRII
TFPI	DHX58	IL-2 R beta /CD122
SDC3	ARL5B	IL-9
SMAD4	STAT1	IL-17E
IGFBP6	LINC00475	IL-18 R alpha /IL-1 R5
NET1	DHCR24	IL-18 R beta /AcPL
IL15	FAM65B	IL-22 BP
GPX1	SETDB2	IL-28A
GATA3	BRIX1	IL-29
ERBB2	B3GALNT1	IP-10
ADAMTS1	PARP8	I-TAC / CXCL11
EPHA2	AKR1C2	Latent TGF-beta bp1
INSR	PODN	Lck
GDF11	RASGRP3	Leptin (OB)
HADHA	FEM1C	LFA-1 alpha
MMP16	PLSCR1	LIGHT / TNFSF14
FZD4	LAMB1	L-Selectin (CD62L)
MSLN	NDRG4	Lymphotactin / XCL1
TNFRSF25	BRIP1	MCP-1
CTSB	AKAP6	MCP-2
SART3	BDKRB1	MCP-3
PKM	MYBL1	MCP-4 / CCL13
TNFRSF1A	FBXO6	M-CSF
SERPINE1	CREB3L2	M-CSF R
TXNIP	USP15	MIG
RARRES2	ERLIN2	MIP-1a
TIMP1	FILIP1L	MIP-1b
TG	LIMA1	MIP-1d
IL22RA1	UHMK1	MIP 2
KRT8	NMI	MIP-3 alpha
TLR2	SNX30	MIP-3 beta
TAF4	SETD7	MMP-11 /Stromelysin-3
ALK	SLC1A2	MSP alpha Chain
INHBB	ITGB2	Musk
FGFR3	RGS3	NAP-2
LGALS1	ITGA2	Neurturin
ROCK2	FYTTD1	NGF R
FZD6	APOBEC3G	Nidgen-1
APEX1	DIAPH3	NrCAM
PTK2	MX1	Osteoprotegerin / TNFRSF11B
PTK2B	C1S	PARC / CCL18
SPINT2	CFLAR	PD-ECGF
ACVR1	VCAN	PECAM-1 /CD31
LBP	CCRN4L	PF4 / CXCL4
IL16	MAGED1	PlGF
FGFRL1	DENND2A	Progranulin
ALDOA	RNF19B	RANTES
IL21R	NEDD9	SCF
TOPORS	SREBF2	SCF R /CD117
EPHA4	HAPLN3	SDF-1 / CXCL12
IGFBP1	SNAI2	Smad 8
IL11	SQLE	Prdx6
DDR2	JAK2	Spinesin
CD97	GPR56	Tarc
EPHB3	LMO4	TCCR / WSX-1
NTNG2	OPTN	TECK / CCL25
SLC2A3	SLC38A2	TGF-beta 5
CDKN1B	PDCD1LG2	TPX
PLAU	DAZAP2	Thymopoietin
EVI5L	MAB21L2	Tie-1
VTN	MYL12A	Tie-2
IFNGR1	IRS2	TRAIL / TNFSF10
LIF	EHD3	TRAIL R1 / DR4 / TNFRSF10A
TGFBR1	CCL20	TRAIL R2 / DR5 / TNFRSF10B
S1PR1	PDLIM1	TRAIL R3 / TNFRSF10C
EPHA5	EXOC6	TRAIL R4 / TNFRSF10D
CTSD	TRAM1	TSLP R
ROCK1	CYB5A	VCAM-1 (CD106)
CUTA	APOL3	VE-Cadherin
PDGFC	ITM2B	VEGF
ADAMTS13	GBP2	VEGF R2 (KDR)
TLR1	TJP1	VEGI / TNFSF15
FGF17	SLC6A6	XEDAR
PROS1	ARF6	Beta Defensin 4
TRPC1	TNFAIP3	Beta IG-H3
IL31RA	SUB1	BMP-9
MMP10	CA11	Calsyntenin-1
ALDOC	CDS2	CFHR2
DIABLO	HIC1	CSH1
MMP25	CPT1A	Defensin
NME1	CHST3	DLL4
SERPINF1	RNF138	FABP4
ROR1	SVIL	Galectin-7
LRP1	ZNF616	GST
HSPB1	FASN	hCGb
KLF4	ADRA1B	Vasopressin
TSLP	BICD2	DcR3 / TNFRSF6B
VASN	MYOCD	FGF-BP
FUT4	CAMK2N1	I-309
TGFB2	RAB8B	IFN-gamma
TNFSF4	TCF7L1	IL-21
LRP6	LMO7	IL-26
LTK	SALL1	Insulin
MICA	ENY2	Kremen-1
B4GAT1	KLHDC3	MFRP
SFRP1	SLFN12L
EEF1A1	STAT6
ADAMTS4	PSMA4
GORASP1	DDAH2
CX3CL1	OAS1
CLDN4	ATP10A
ANXA7	MARCKSL1
ROBO4	AGPAT3
MMP19	LBH
CD36	C4orf3
CST3	SLC1A5
APLN	UCN2
LAG3	TPM1
IL17D	PSMB9
PDGFRB	TMEM171
SMAD5	NAV2
MTDH	FADS2
FADD	RIN2
SNCG	TMEM60
TNK2	SPG20
KRAS	PGPEP1
TNFRSF11A	SYT11
IGFBP3	CBR1
BDNF	MRPL32
TNFRSF12A	TP53I11
IL17RB	PRRT1
IL24	HRASLS2
TGFB3	PDGFRL
SMAD7	DYNLT1
IL20	FAM213A
CNTF	C16orf45
BIRC5	PDE8A
IDE	EPG5
BGN	TANC2
CYCS	GTF2B
APC	NEURL1B
NF1	SOD2
SIGIRR	APCDD1L-AS1
PDGFB	QSOX1
SHBG	PBX1
IGF2BP1	PIK3R3
KCTD10	SPTBN5
CHI3L1	RASSF2
FEN1	LDB1
VEGFC	PARP10
ADAMTS10	SAMD9L
PRKAA1	NFATC4
MMP12	ARRB1
ASPH	NPC1
ABL1	LIMK1
VDR	ACTG1
PHB	PLSCR4
LEPR	NXN
MMP24	CFB
ERBB3	RNF149
TP53	P3H2
GMNN	HNMT
TIMP2	ISG15
RECK	SLFN5
ACVR2A	CCDC109B
PLAUR	HSD17B2
ROR2	EHD1
GPX3	BACH1
ESAM	RNF144B
RELT	ATP13A3
F10	TXNDC12
HSPA1A	CDK14
ATRN	KRT34
LZTS1	LPIN1
CA9	IRF7
BMP2	GNG11
FER	SLFN13
TNFSF13	SLC6A9
SERPINI1	GUCD1
LGALS3	SCLT1
IL3RA	RELA
GRB2	KRTAP1-5
IL17RA	CDR2L
TNK1	TAPBP
TYK2	NUDCD3
RYK	PANX1
IL23A	UNC5B
SPINT1	C7
NRG2	SAMD9
IL13RA1	DYNC1I2
CDKN1A	ARMCX2
CLEC3B	VWA5A
EPHA1	TRIM22
ARTN	ITGA8
HSD11B1	ACTN2
CCR1	SERPINB6
ADAMTS19	MASTL
IL17RC	PPM1K
TNFSF12	MOV10
TMEFF2	BCL2L13
PSPN	HEBP1
IL10RB	IRF2
CTNNB1	PSMA2
PYGB	ATP6V1B2
TEC	PBXIP1
TGFBR2	PTPRA
EDN1	CCL2
ADAMTS15	GRIP2
TNFRSF19	PPM1B
PIK3R1	MYO10
TNFRSF18	PON2
TNFRSF4	NAPA
SLC2A5	C21orf91
NPPB	GLT8D1
EPHA8	CMPK2
FCN3	FOXP4
HCRTR1	ODF2L
CSF3R	LTBP1
BMP8B	L3HYPDH
ANGPTL3	SAMHD1
IL23R	PKD1L1
IL12RB2	PSME2
PROK1	GPR125
TSHB	STK4
S100A12	UXS1
S100A8	TMPO
BGLAP	TMTC1
INSRR	SLC18B1
APCS	GPR37
CRP	KBTBD2
APOA2	INSC
SELP	PLEKHA4
CFHR2	PPP1R12B
CNTN2	FOXL1
IL10	MGAT5
IL19	DDX60L
IRF6	UAP1L1
LEFTY2	WFS1
APOB	F2R
POMC	FAM193B
LHCGR	TRIM38
TGFA	N4BP1
ZAP70	OLFML3
IL1RL2	GLP2R
EDAR	PDHX
MERTK	NFASC
IL36RN	FAIM2
IL1F10	F2RL1
CXCR4	BTG3
GCG	TSPAN12
NEUROD1	KIAA0226
FRZB	CAMK4
MSTN	SOX12
ERBB4	TRAFD1
IGFBP2	IFI27
CXCR2	MTSS1L
CXCR1	DTX3L
PDCD1	CASP1
IL5RA	HTRA3
GHRL	TMEM97
TIMP4	DTX4
TRIM71	FDPS
CCR4	ELN
CCR8	RPL41
CCK	PGM2L1
ACKR2	LIPA
CCR9	CNPY4
CXCR6	SHISA5
CCR3	MKRN1
CCR2	ARID5A
CCR5	NCEH1
LTF	TMEM229B
TDGF1	LACTB
TNNC1	NKX3-1
IL17RD	NBN
EPHA3	PEG10
EPHA6	ZCCHC3
RETNLB	APBB3
CD200	MOXD1
CSTA	CCDC71L
TF	PPT1
EPHB1	PCSK6
CP	G3BP2
SLC2A2	ME2
THPO	CTD-2228K2.7
FETUB	GNB4
HRG	CDH6
KNG1	SH3BP4
OSTN	D4S234E
FGF12	IFI16
FGFBP1	PRPF8
TXK	C1R
AFP	MT-ND3
AFM	C14orf132
BMP3	CD248
SPARCL1	ZBTB4
DMP1	C1QTNF6
BMPR1B	BTBD3
EGF	HLA-G
FABP2	RBCK1
IL2	XPO6
IL21	TJP2
FGA	SPSB1
GHR	GPBP1
SEPP1	EIF5A2
FGF10	ZC3H12A
GZMA	C9orf91
NAIP	ANLN
CARTPT	RGS20
THBS4	IRG1
IL3	GPCPD1
IL5	TBL1XR1
IL13	SNPH
IL4	UHRF1BP1
GDF9	RBMXL1
CXCL14	LGALS8
LECT2	ZNF629
GFRA3	ELOVL2
IL17B	DNAJB4
HAVCR1	CDKN2B
ITK	EEPD1
IL12B	ENTPD7
FGF18	KCTD9
NRN1	QKI
PRL	C12orf75
POU5F1	ENOSF1
LTA	LINC00883
LTB	VCPIP1
TREM1	TMSB4X
PGC	CYGB
IL17A	LSS
IL17F	FMR1
GSTA1	TANGO6
CGA	EPSTI1
EPHA7	MT1E
FRK	EXTL3
ROS1	UBA6
IL20RA	WWC1
PLG	ACSL5
HOXA10	GSDMD
SFRP4	CASP10
CLDN3	CC2D2A
PON1	ACTR3
TAC1	GLS
PRSS1	UCK2
EPHB6	LRRC8D
SHH	MB21D2
VIPR2	FBXL7
CSF2RA	LPAR1
FIGF	CSDE1
BMX	SNX29
ACE2	LBR
PCSK1N	DSE
FOXP3	NUMBL
BMP15	VASH1
EDA	ARPC5
IL2RG	HIF1A
CXCR3	ELF1
FGF16	FAM102B
BTK	B3GALT2
CHRDL1	FBLIM1
GPC3	TNS3
DEFB1	FDFT1
DEFA5	PITPNB
DEFB4A	PSMA3
GATA4	ACSS2
FGL1	SERPINB8
GFRA2	KIF16B
FZD3	TMEM64
DKK4	TXNRD1
SOX17	TSPAN33
FABP4	ZDHHC16
CALB1	FRMD6
ENPP2	PTGES3P1
BAI1	MOB1A
IL33	SNX6
PTPRD	HOXC8
CER1	APH1B
CNTFR	RP11-79H23.3
CCL21	EXOSC9
NTRK2	DEK
SYK	TFAP4
TMEFF1	IMPDH2
ALDOB	CPED1
TNFSF8	ATP2B4
TLR4	TMEM87B
LCN2	DBN1
ADAMTSL2	PTPRN
LCN1	DRP2
INS	ICMT
LYVE1	DCP1A
CALCA	PDXDC1
FSHB	ANXA2
WT1	UVRAG
F2	AOX1
APLNR	TYSND1
PGA3	SPATS2L
SCGB2A2	SLC51B
GAL	PAMR1
FGF19	CRTAP
FGF4	P3H4
FOLR1	MAX
CHRDL2	IFIT5
TRPC6	MOB3C
MMP7	FAM53A
MMP20	PXDC1
MMP8	RRM2B
MMP13	MCC
NCAM1	ZNF664
IL10RA	CDC42EP3
AMICA1	ZNF804A
MFRP	LOXL1
CRTAM	GRAMD4
IL2RA	LAMA5
GDF10	STAP2
MBL2	ANTXR2
NRG3	CELSR3
RBP4	SH3BGRL
FGF8	NFKBIE
FGFR2	TAPT1
FGF23	TSC22D2
FGF6	UNC45A
CD163	NDUFS2
GDF3	XRN1
NANOG	PNPLA6
IAPP	OSMR
PTHLH	PPARA
CNTN1	TKT
NELL2	COLEC10
LALBA	ABCF1
WIF1	SNED1
IFNG	C15orf48
IL26	TMEM123
IL22	ETFB
IL31	RTN3
FGF9	PHF12
PDX1	SMIM3
FLT3	ZC3H12C
TNFSF11	IFITM2
GPC5	GAS7
CHGA	GRAMD3
SERPINA6	ARHGAP6
SERPINA12	NDFIP2
SERPINA5	ACADVL
SERPINA3	PAQR7
DLK1	SLC26A2
SCG3	THSD1
ADAMTS17	TARS
WFIKKN1	PPT2
KREMEN2	TBC1D1
TNFRSF17	GOLM1
IL27	RBMS3
PRSS8	DENND5B
ITGAM	NID2
CCL22	SEPT4
CDH3	CTD-2562J17.6
CDH1	SIX1
ADAMTS18	PLA2G4A
IL17C	ETNK1
FGF11	RP2
TNFRSF13B	RHOBTB3
SLC6A4	SHROOM1
CCL1	ADAMTS8
CCL16	ABHD2
CCL14	XKR8
CCL23	MAP3K12
GAST	TUBB6
SOST	ANGPT1
PPY	CDC42EP1
PYY	PARP4
CSH1	COL4A1
GH1	C2orf27A
ICAM2	DSEL
GRP	CALM2
CNDP1	FLRT2
ANGPT4	HELZ2
AVP	UROD
GFRA4	CTNNAL1
PAK7	STOML1
HCK	TNIP1
BPIFA1	NOLC1
SLPI	IGDCC4
WFDC2	SIK2
MMP9	FSCN1
BMP7	ZNFX1
BIRC7	PSMA5
SRMS	MTMR1
TNFRSF6B	IFI44L
MATK	MINK1
LRG1	MDM2
RETN	STOX2
ZGLP1	TRIM65
ICAM3	ZBTB40
DAND5	LTA4H
CERS1	KITLG
HAMP	SLC26A6
LGALS7	TNKS1BP1
CLC	MMD
CEACAM5	CEND1
APOC1	IKBKE
PGLYRP1	TMED9
FGF21	TGM2
NTF4	GCNT4
DKKL1	DDX52
KLK3	SOX4
KLK2	PSMF1
KLK5	HAS3
KLK7	GTPBP1
KLK8	WNT5A
KLK11	FUBP1
KLK14	MPP1
SIGLEC9	TMEM173
SIGLEC5	THY1
MIF	ARHGAP17
KREMEN1	MPHOSPH6
OSM	TMEM150A
MB	RNF152
TNFRSF13C	CLIC4
BIK	ADRB2
FAM3B	GPRIN1
TFF3	SLC39A7
TFF1	SLC2A12
S100B	ACAT2
	LGALS3BP
	RBM3
	DDI2
	RBMS2
	CHRNA1
	HMGN2
	NID1
	LIN7C
	FLI1
	SH2B1
	C11orf95
	ULK1
	PLA2G16
	CSGALNACT1
	ADPRHL2
	PPP1R14B
	TRIOBP
	PARP14
	ARL4D
	JAZF1
	FHOD1
	IFFO2
	IGF2
	PATL1
	EMILIN1
	EFR3B
	DNM1
	KIAA1217
	ADI1
	PGF
	EIF4EBP2
	OAS3
	CTNNBL1
	SIKE1
	ASPHD2
	MVD
	RP11-1100L3.8
	SERINC5
	PAFAH1B2
	LRRC32
	ARID3A
	FAM102A
	NPTN
	TPGS2
	TCOF1
	DRAM1
	HABP4
	SSH3
	ADAT2
	MAP3K14
	PTN
	C7orf69
	CCBE1
	SLC38A7
	R3HCC1
	MUM1
	CSDC2
	SLITRK5
	CALD1
	MARVELD1
	MT-ND1
	ARID5B
	CAB39L
	C1QL1
	GOLGA2
	TGM1
	MTF2
	IKBIP
	APOBEC3B
	TMEM165
	COQ10B
	HDAC5
	BST1
	CUL2
	DCAF12
	MAP4K3
	RPS6KA6
	PAPPA
	HSPA2
	KIAA1033
	RAB11FIP1
	L2HGDH
	COMT
	SERPINB9
	TMEM106A
	PGAP1
	CYP2S1
	ST3GAL1
	PHF20
	ACTN4
	CXorf38
	AIDA
	ADAMTS12
	LIN52
	CDR2
	CORO1C
	ABHD17C
	APOL1
	UBE2V2
	PCGF5
	NTM
	ATP1B3
	SEMA5A
	USP6NL
	ACTG2
	HYOU1
	LOXL2
	SMIM14
	USP18
	PARP9
	TCN2
	ABL2
	TRIM25
	LPAR6
	DDHD1
	PLD2
	CLUHP3
	SNIP1
	SLC12A8
	ANKIB1
	NDUFA9
	GLIS1
	GREM2
	CBX6
	ABHD5
	NECAP1
	TFAM
	UFM1
	ANKRD13B
	SUV420H2
	MAP4K4
	CNNM1
	HLA-E
	SLC25A29
	PLCB3
	MT-ND6
	FAM168A
	DLG5
	NAMPT
	ATP6V1A
	FBXO21
	ZFYVE26
	AKR7A2
	DIXDC1
	ZNF652
	ZNF710
	PPP2R2A
	PRMT6
	CHN1
	SP100
	COLEC12
	CAD
	TEX2
	PGAM1
	AZI2
	ALDH3B1
	ANO7P1
	USP28
	SRPX
	APBB2
	CYLD
	TRAPPC1
	APBA1
	STARD8
	STS
	B3GALNT2
	ALPK2
	C11orf84
	KPNB1
	CXCL6
	TAB2
	DDX24
	EDEM3
	AHDC1
	VPS4B
	CLMP
	HERC6
	CCNL1
	CAV1
	RNF19A
	SCAMP1
	SH3D19
	SERPINB1
	CUL4B
	MAML2
	RNF122
	MCM4
	AC058791.1
	STK35
	SCML1
	MMGT1
	EFR3A
	ULK3
	POU2F2
	MAP1A
	FKBP4
	PSD3
	ADAM10
	SMOC1
	PLA2G4C
	ABCA7
	C10orf54
	TMEM194A
	PHTF1
	ARMC9
	GK5
	TCF3
	CD55
	C6orf62
	SEC13
	HDGFRP2
	NCOA3
	NOC3L
	SMYD2
	ATG7
	ELOVL4
	DHX15
	TM4SF1
	C5orf56
	C6orf89
	CAMK2D
	OBFC1
	BTRC
	ARL6IP5
	THEMIS2
	TTC3
	HLA-H
	NQO1
	ECH1
	IMPA1
	PRKD2
	FAM49A
	PLCD3
	CAPN5
	TOR1AIP1
	WASH2P
	STAT5B
	PCNXL4
	SLC25A3
	ZC3HAV1
	HS2ST1
	TMEM52B
	TYRO3
	TMEM26
	EPT1
	PCNXL3
	TAC3
	P3H1
	BTG2
	SRGN
	GIGYF1
	RANGAP1
	CYP2J2
	TET2
	USP53
	TANK
	KIAA1644
	DUSP16
	TMX4
	METRN
	AGAP3
	HDLBP
	NCOA2
	FOXK1
	PHTF2
	TMEM178B
	ZDHHC7
	ANKFY1
	KDELC1
	CTC-231O11.1
	DCAF7
	SCN1B
	MED25
	HMG20B
	CTTNBP2NL
	DAP
	EIF3J
	NNMT
	TNS1
	C19orf66
	ITGB2-AS1
	TCEA2
	C1orf198
	SIRT5
	FRMD3
	FBXO33
	EIF2S1
	ORC4
	CORO2B
	FERMT2
	HRH1
	MT-CO2
	GOLGA3
	RP11-686D22.7
	CDC42SE2
	ECHDC1
	KIF1C
	BCAP29
	ERAP1
	NFKB1
	RP11-638I2.10
	GDI1
	GSTK1
	CHD3
	MAN2B2
	MYL12B
	PAPD5
	ELMO2
	LOXL3
	PLAT
	SOX13
	WWC2
	ZFP90
	ACOT7
	ADCY6
	SFMBT1
	DUSP8
	AC116366.6
	SFXN3
	P3H3
	SAMD12
	ACAP3
	SDCBP
	KLHL24
	BTN2A1
	RAB29
	FAM98A
	SETD1A
	PDE7B
	ITGB5
	PERP
	C9orf69
	PFKFB3
	UBE2J1
	DAAM2
	PLXND1
	AMOTL1
	DHX36
	TMEM176B
	PTGES
	GNB3
	HIST4H4
	FRS2
	IFI44
	NPEPPS
	ZNF436
	TNKS2
	CLIP3
	PTGIR
	SLC8A1
	SNX27
	RP11-834C11.4
	SLC44A2
	MT-ND5
	SNTB1
	BEST3
	DNAJB5
	DOCK10
	DCTN4
	RASA3
	HLA-B
	RNF167
	KDM2B
	PRICKLE1
	ADCY3
	KDELR1
	GRASP
	HIATL1
	HEG1
	LRIG3
	DDR1
	POMP
	BAI2
	CSNK1E
	SLFN11
	RP5-907C10.3
	SLC15A3
	TCF7L2
	FAM109A
	CYP4V2
	LRIG1
	NGF
	SLC25A32
	PPA1
	APOL2
	IKBKAP
	STARD7
	ENTPD1
	YEATS2
	DICER1
	RASL11A
	CNNM2
	PSMD12
	SLC46A3
	ZNF623
	CRELD2
	ADAMTS6
	ARHGAP27
	CD109
	GIMAP2
	PEX11B
	LPCAT1
	DNAJB6
	DOCK9
	TRIM46
	SLC7A2
	TMEM176A
	GJA1
	RBM22
	RAD23A
	TRIM45
	NOTCH2
	RRNAD1
	VAMP5
	CAB39
	PLEKHG2
	HAP1
	SKA2
	CASP4
	GCA
	APBB1
	CASZ1
	AMPD2
	KIAA1377
	MAPK12
	PRICKLE2
	CD2AP
	MED10
	SEC23B
	PSMB10
	UBA7
	FAM53B
	PARD3
	GPR161
	RNF213
	AC104654.2
	TPMT
	STAMBPL1
	VPS54
	SSTR1
	FGD1
	B3GNT2
	SPTA1
	SLCO3A1
	HEMK1
	ZKSCAN1
	ADD3
	DNAJC7
	UBE2E1
	ORC6
	PRRC1
	NABP1
	TP53I3
	UBXN7
	BNC1
	EEF2K
	ATP5L
	SMARCA5
	AKAP7
	TICAM1
	LRRFIP2
	WTAP
	MEF2D
	NPTN-IT1
	TECPR2
	PSMB2
	SMPDL3A
	PIEZO2
	CUL7
	SCP2
	MORC3
	SBF2-AS1
	LHFPL2
	ASL
	PIANP
	SSR2
	BFSP1
	MANF
	NIFK
	RAB3GAP1
	C11orf49
	ADAMTS14
	ZNF76
	UNC119B
	PSTPIP2
	FOXP1
	GTF3C1
	PHF1
	HCFC1R1
	NUAK2
	TINF2
	RBM47
	PPDPF
	MEFV
	NADK2
	RAB39B
	TMEM159
	SSBP3
	METAP1
	AC093724.2
	TGOLN2
	PRKACB
	TACC1
	SDPR
	HSPH1
	CERK
	KARS
	TNC
	PI4K2A
	SLC39A8
	CXCL9
	FBXW11
	MT-CO3
	RFX5
	AP1G1
	TIFA
	ANKRD50
	KAZALD1
	HPS4
	SALL2
	BCL6
	SBNO2
	YWHAZ
	TP53BP2
	EIF2S2
	ABLIM3
	TBX2
	GRN
	EGLN1
	APOBEC3F
	ECT2
	BNIP3L
	HERC5
	CTD-3064M3.3
	CCDC85C
	ZER1
	HIPK1
	TOR1B
	PNRC2
	ZFP36L1
	CALCOCO2
	GLDN
	MIER1
	H2AFY
	GATA6
	MAPRE3
	KIAA1522
	PHF13
	SNHG3
	PSMB8
	REEP2
	ELOVL6
	PXDN
	COL4A6
	C8orf46
	JKAMP
	COL7A1
	DPY19L4
	CD44
	ACSL3
	PPP1R3C
	ENO3
	AQP3
	ZSCAN29
	PRKAR2A
	WSB2
	ZFPM2
	TMEM45A
	C7orf49
	RP11-174G6.5
	TAOK2
	CPT1C
	ARID4B
	NUP62
	C9orf78
	IFNAR2
	GLMP
	C11orf24
	POU6F1
	PPIF
	NPM3
	HMSD
	ARL8B
	LACC1
	SOCS7
	C3orf18
	PFKM
	GAB2
	AKAP12
	NAV1
	USP47
	P4HA3
	MYO18A
	MXD1
	ZNF318
	BCL7A
	MAF1
	ATP6AP2
	ZNF512B
	PHF10
	RAP1B
	LINC00205
	MGAT4B
	WDR44
	SASH1
	GRB10
	PIEZO1
	FAM120C
	ANKRD13A
	RPS18
	SUCO
	ZMYND15
	ZEB2
	DUSP4
	DENND4A
	FHL3
	PHGDH
	SIRPA
	TCF21
	LINC01089
	KAT6B
	HEXIM1
	SEC63
	MIR222HG
	SLC37A1
	NCF2
	CELSR1
	TSHZ1
	SLC43A2
	MAP3K5
	TLDC2
	UBE2E3
	HIC2
	FOXRED2
	GLRX5
	BX322557.10
	MED13
	PPP1R9B
	FAM26E
	KIAA0368
	PRKAA2
	BET1L
	LRFN4
	GVINP1
	SLCO5A1
	MAVS
	TIMM17A
	GABARAPL1
	LYSMD2
	ASB13
	ZBED4
	FMNL1
	CISD1
	TANC1
	TMEM258
	GLE1
	SSX2IP
	CTD-2521M24.5
	UBE2Z
	CLIP2
	CBLB
	ABCC5
	MDC1
	VGLL3
	PABPN1
	HIRA
	NSMCE1
	LAMTOR4
	UNC13B
	TRIM14
	KIAA0195
	RAB32
	RPS6KA2
	RGS9
	ACBD5
	ORAI2
	LAMC1
	CDIPT
	HEXDC
	PHLDB1
	HLA-A
	MSL1
	ARPC2
	TTC38
	SP110
	SECTM1
	CSF3
	MEIS1
	NABP2
	ZNF277
	RPN2
	SCAP
	TRIB1
	ZNF655
	TMEM214
	CA13
	KLHL29
	ARHGAP5
	TMEM140
	HIPK2
	CAT
	ATP5G2
	POFUT1
	MYL9
	BCL9L
	IVNS1ABP
	ETV4
	MYH10
	PCDH18
	CAPRIN2
	SPOP
	FAM20C
	CHSY1
	MT-RNR2
	MYO19
	PTMS
	RCOR1
	CAPZA1
	CDKN2D
	ZC3H7B
	SREBF1
	FUT11
	GPC1
	HSDL2
	APLP2
	DLG4
	ALDH18A1
	MCOLN1
	LRRC75A-AS1
	SEPT11
	NSMF
	KIF5B
	BAZ1A
	ACACB
	CCDC50
	NLRX1
	FBLN1
	C17orf67
	TMBIM4
	CPEB2
	GPR65
	LEPROT
	BZW1
	COLGALT1
	ZADH2
	KCNF1
	CAND1
	HERC4
	SETX
	CDC14B
	KLHDC8B
	PCSK9
	MFSD2A
	RGP1
	SMIM13
	ESYT1
	TLN2
	CKAP2
	UBE2O
	PTDSS1
	PCMTD2
	IFNGR2
	TEAD3
	SRSF2
	MKL1
	RPAP3
	SYNGR3
	FAM21A
	KHNYN
	GSAP
	NLRC5
	NSDHL
	NELFB
	BNIP3
	JMY
	HKR1
	TM9SF2
	PHYH
	DDX21
	MLEC
	PLCE1
	AC004988.1
	NINJ1
	PDIA6
	RMI1
	TOMM20P2
	CCNYL1
	SEC62
	UBC
	PHAX
	CXXC5
	POLA2
	AKR1B1
	MUC1
	ZW10
	ASAP2
	CAPZA2
	MED15
	AK3
	GPRC5A
	TTYH3
	DENND5A
	TUSC2
	ARHGAP12
	KPNA4
	LMO2
	GPR107
	TK1
	ATXN7L1
	HOOK3
	PBX2
	TMED7
	MT-CO1
	SULF1
	PITX1
	SRD5A1
	TRIM21
	GCNT1
	WDR54
	CCDC80
	SLC8A2
	HAGHL
	KIAA0040
	SLC25A15
	PIK3C2B
	C3orf52
	HLA-C
	CRYAB
	EGFL8
	MT-ND2
	F11R
	ZMYM4
	PHACTR2
	DNM3OS
	FAM3A
	CNTN4
	GABPB1-AS1
	SHC4
	SDCBP2-AS1
	ZNF792
	PLEKHF1
	NEGR1
	SLC10A3
	OPLAH
	RBM7
	KIAA0020
	LONP2
	SLC20A2
	CDK16
	C22orf46
	HADH
	ZNF688
	RP5-857K21.6
	ACO1
	TTLL7
	SYNGAP1
	CCDC57
	SUGP2
	MMS19
	RBL2
	MBOAT1
	ZNF227
	C9orf172
	WDR6
	FAM160B1
	PCTP
	TOMM22
	NPRL3
	TRIM5
	SEPT10
	AKT2
	ZNF398
	TP53I13
	PRRT3
	KIFC2
	VEGFA
	TEAD2
	CUX1
	OST4
	TAF12
	AC011997.1
	ELOVL3
	TMEM120B
	UPP1
	C1orf52
	PAQR5
	PFKFB4
	PRMT9
	PRAF2
	PITPNM1
	NR2F6
	GGA1
	ATG12
	EML3
	CARD16
	RNF41
	AJUBA
	CNTROB
	SEPW1
	KRTAP2-3
	IFI6
	SIRT2
	SRPR
	TUBA4A
	FBXL20
	RBBP6
	C1orf233
	STOM
	PCDH17
	CTD-3252C9.4
	MEA1
	DECR1
	MAN1A1
	ATF5
	CCM2
	SAMD4A
	NME7
	CARD6
	HAT1
	RELB
	PRPF4B
	OSBPL5
	PRKAB2
	ERRFI1
	ANO2
	ERAP2
	PC
	SCO2
	BCORL1
	TSPYL2
	FENDRR
	DPYSL3
	USP30-AS1
	MAP3K4
	KIRREL
	SLC35A4
	SLC6A8
	WHAMM
	PPAP2B
	COL16A1
	HNRNPK
	GSTZ1
	BAHCC1
	PARP11
	KIF3C
	TMEM219
	KLHDC10
	MAP3K7
	CLIP4
	PLAGL1
	ATL1
	GADD45B
	LIX1L
	RNF217
	DGKI
	C4B
	TBXAS1
	PPOX
	HPSE
	UBE2D3
	ZNF3
	ARHGAP1
	P4HTM
	STK36
	GLCCI1
	PSKH1
	SOGA1
	DTNA
	ATG16L2
	PEA15
	MCOLN2
	KIFAP3
	SEPT9
	RILPL2
	FAM212B
	ARMCX6
	KLF6
	RALB
	PRIM2
	ALDH16A1
	APOL6
	NRD1
	CREBL2
	ADAM17
	EBI3
	ARRDC3
	ANXA3
	RP11-1094M14.8
	EHF
	CLCF1
	MEN1
	ADAR
	PRPF3
	RTP4
	NFYA
	HDHD2
	RDH10
	TBCK
	SLC35F2
	USP22
	COL4A5
	AHNAK2
	SPIRE1
	TMEM38B
	FKBP7
	CACNG8
	TRIM28
	RXRA
	DENND3
	SNHG18
	ANP32E
	CLN8
	HIPK3
	NDST1
	DBF4B
	NRIP1
	MT-TF
	HECTD3
	TBC1D23
	BAHD1
	HS1BP3
	AIFM2
	RPS6
	SLC25A20
	KCNK6
	MGAT3
	RASL12
	OSTC
	C3
	BST2
	ATP2A2
	IFI27L2
	PLA1A
	CDK18
	RP11-686D22.4
	PPIB
	FAM177A1
	NXT2
	HOMER3
	ZNF667
	NFS1
	MEGF8
	ATP6V1D
	ATP1B1
	NAGK
	KPTN
	KRT10
	CD164
	PIGX
	MT-RNR1
	XPR1
	PRKACA
	WIPI1
	LINC00847
	TRO
	EMC2
	MXRA8
	RP11-757G1.6
	STT3B
	FAM127B
	GPR135
	FLYWCH1
	LAMP2
	ARHGEF25
	SEMA6D
	EXOC3L1
	MEOX1
	DLD
	RP11-415J8.3
	ATP6V1F
	DNAJC15
	COL5A2
	TBK1
	PLCD4
	NISCH
	MRFAP1
	MCAM
	DMXL2
	PYGO1
	RP11-366L20.2
	BLVRA
	HSD11B1L
	ASAP1
	CAMK2G
	LDOC1L
	LINC00511
	TSC1
	BLOC1S3
	TMCO4
	SLC39A14
	TIA1
	GDF7
	MTA1
	RP11-21L23.2
	KBTBD8
	AKNA
	LY6E
	ACTB
	SAP30L
	PLEKHG4B
	SPTSSA
	CTD-2033D15.2
	NIPAL3
	MXD4
	KLHL5
	SLC20A1
	RPS29
	TPCN1
	DGKA
	TMOD1
	THRA
	MMAA
	TRIM58
	TFB1M
	RP13-143G15.4
	MAZ
	UGP2
	TPM3
	OGFR
	RAB3IL1
	HEPH
	IDH2
	CTA-384D8.36
	POLR3C
	TNPO3
	RAD51AP1
	MT-ATP6
	REEP3
	STX18
	DENND2D
	TIPARP
	NNT
	NUMA1
	EEF1A2
	CEP57L1
	PLEKHM2
	DDB2
	B3GNT9
	KCMF1
	AC006548.28
	AC009133.12
	CES2
	ZNF211
	SYPL1
	AC007879.7
	MMAB
	RAD1
	ZBTB25
	MAST2
	TSPYL4
	RP4-756G23.5
	ZNF142
	PPP1R3G
	CTD-3035D6.1
	INA
	C2CD5
	IFNL1
	CHIC2
	KIAA2018
	ITGAE
	FBXO5
	RNF115
	ENTPD5
	TMEM189
	SNRK
	NFE2L2
	PHF23
	MOB4
	CLEC2B
	MST1R
	ARMCX4
	FAM111B
	AGPAT1
	ACTN1
	SSR3
	CYHR1
	VAT1L
	SH3GLB1
	MITF
	FNBP1
	MAP7D1
	PAFAH2
	MELK
	PHYHD1
	FIBP
	SLC17A5
	SSC5D
	BTN2A2
	SRPX2
	PLEK2
	PRR12
	ROBO1
	STX1A
	ASNS
	USP14
	PLXNB1
	PLEKHO1
	OGFRL1
	GPRC5B
	NPAT
	ISCA1
	USP16
	LYPLA1
	CLDN23
	FBXO39
	CCDC88A
	LHFP
	PLXNB3
	IKZF4
	TMEM54
	PCGF2
	PAN2
	SLC2A11
	RP11-449P15.2
	AK5
	MR1
	ADARB1
	IFT57
	HS3ST3B1
	AP1M1
	FOS
	UBAP1L
	COX6C
	RELL1
	ETV1
	DSTYK
	NPHP4
	HEBP2
	ZNF862
	EZH2
	OS9
	DCAF4
	SRRM1
	CYP51A1
	RB1
	AC016747.3
	PRKCI
	RP11-686D22.8
	LNPEP
	COX7A1
	TSPO
	USP33
	MRRF
	RPLP2
	CD99P1
	RCAN2
	TMEM116
	PIP4K2B
	TRABD2A
	CMTM3
	ACSF2
	C5orf22
	CA8
	C2
	PRPS2
	CAST
	SMOX
	HLA-F
	CHST7
	MEGF9
	ISG20L2
	GAS6-AS2
	CD276
	KCTD12
	NFIC
	MLLT11
	TRIO
	ARHGAP35
	PPP1R12A
	ERGIC3
	ITSN1
	ZBTB33
	GCLM
	UBTF
	IPO8
	LETM1
	TTLL12
	COL13A1
	STARD13
	WDR11
	H1F0
	FAM189B
	NRBF2
	TARS2
	SMG7
	TBX18
	MEX3D
	C16orf58
	RP4-742C19.13
	MANEA
	MRPL52
	SGCB
	SS18L1
	RPAP1
	SEC22B
	RPS6KB1
	PRDM16
[truncated: 62,516 more rows]
