# Supplementary material for: ERK3/MAPK6 controls IL-8 production and chemotaxis
Source: eLife journal article supplement (doi:10.7554/elife.52511), 2020-04-21
Supplement: supp [file elife-52511-supp-v1.zip › elife_poa_e52511_Figure_6_source_data_1.xlsx]

## Sheet: siCo
Application: Tecan i-control				Tecan i-control , 1.11.1.0
Device: infinite 200Pro				Serial number: 1504003213				Serial number of connected stacker:
Firmware: V_4.23_01/15_Infinite (Jan 16 2015/13.38.13)				MAI, V_4.23_01/15_Infinite (Jan 16 2015/13.38.13)
Date:	27.06.2018
Time:	09:57:06
System				TECAN-NEU
User				TECAN-NEU\serv
Plate				Costar 96 Flat Bottom White Polystyrene Cat. No.: 3600/3362/3917/3912/3922/3596 [COS96fw.pdfx]
Plate-ID (Stacker)
Label: Label1
Mode				Luminescence
Attenuation				NONE
Integration Time				1000	ms
Settle Time				0	ms
Start Time:	27.06.2018 09:57:13
	Temperature: 23.7 °C
<>	1	2	3	4	5	6	7	8	9	10	11	12
A	8063	3646	902	667	2928	3175	3952	5889	2811	7466	6865	7860
B	4909	1321	362	1206	936	1561	1209	3003	1447	4308	9718	5876
C	1514	2518	136	579	5264	5015	7010	2864	5815	6091	7072	6567
D	2637	752	191	56	1633	176	2018	3509	1067	175	7031	3822
E	3006	721	4893	571	1938	515	859	691	916	1826	4399	2849
F	981	510	2298	103	127	711	1722	1141	339	2633	3299	854
G	2742	256	230	289	1065	330	249	313	140	1373	3351	978
H	7522	453	115	205	924	119	1671	281	73	638	1878	7519
	siCo						siCo 24h LPS
End Time:	27.06.2018 09:59:14
	1	2	3	4	5	6	7	8	9	10	11	12
A	AP1	CDP	GATA	NF-1	Pit	Stat3	AP1	CDP	GATA	NF-1	Pit	Stat3
B	AP2	CREB	GR/PR	NFAT	PPAR	Stat4	AP2	CREB	GR/PR	NFAT	PPAR	Stat4
C	AR	E2F-1	HIF	NF-E2	PXR	Stat5	AR	E2F-1	HIF	NF-E2	PXR	Stat5
D	ATF2	EGR	HNF4	NFkB	SMAD	Stat6	ATF2	EGR	HNF4	NFkB	SMAD	Stat6
E	Brn-3	ER	IRF	2004-10-01	Sp1	TCF/LEF	Brn-3	ER	IRF	2004-10-01	Sp1	TCF/LEF
F	C\EBP	Ets	MEF2	p53	SRF	YY1	C\EBP	Ets	MEF2	p53	SRF	YY1
G	CAR	FAST-1	Myb	Pax-5	SATB1	TR	CAR	FAST-1	Myb	Pax-5	SATB1	TR
H	CBF	GAS/ISRE	Myc-Max	Pbx1	Stat1	TFIID	CBF	GAS/ISRE	Myc-Max	Pbx1	Stat1	TFIID
	RLU				Ratio
TF	siCo	siERK3	siCo 24h	siERK3 24h	siERK3/siCo	siERK3 w4h/siCo 24h	siC/siC
AP1	8063	796	3952	547	0.0987226	0.138411	1			downregulated >2.5 fold change
AP2	4909	347	1209	292	0.0706865	0.241522	1			upregulated > 2.5 fold change
AR	1514	348	7010	52	0.229855	0.00741797	1
ATF2	2637	364	2018	246	0.138036	0.121903	1
Brn-3	3006	480	859	129	0.159681	0.150175	1
C\EBP	981	345	1722	204	0.351682	0.118467	1
CAR	2742	287	249	44	0.104668	0.176707	1
CBF	7522	1079	1671	131	0.143446	0.0783962	1
CDP	3646	223	5889	337	0.0611629	0.0572253	1
CREB	1321	521	3003	98	0.394398	0.032634	1
E2F-1	2518	181	2864	99	0.0718824	0.034567	1
EGR	752	475	3509	69	0.631649	0.0196637	1
ER	721	602	691	143	0.834951	0.206946	1
Ets	510	211	1141	349	0.413725	0.305872	1
FAST-1	256	390	313	99	1.52344	0.316294	1
GAS/ISRE	453	403	281	213	0.889625	0.758007	1
GATA	902	138	2811	106	0.152993	0.037709	1
GR/PR	362	179	1447	73	0.494475	0.0504492	1
HIF	136	79	5815	49	0.580882	0.00842648	1
HNF4	191	370	1067	142	1.93717	0.133083	1
IRF	4893	50	916	43	0.0102187	0.0469432	1
MEF2	2298	227	339	73	0.0987815	0.215339	1
Myb	230	177	140	100	0.769565	0.714286	1
Myc-Max	115	379	73	136	3.29565	1.86301	1
NF-1	667	6154	7466	3354	9.22639	0.449237	1
NFAT	1206	354	4308	194	0.293532	0.0450325	1
NF-E2	579	249	6091	209	0.430052	0.0343129	1
NFkB	56	174	175	41	3.10714	0.234286	1
Oct-04	571	44	1826	32	0.0770578	0.0175246	1
p53	103	1597	2633	25	15.5049	0.00949487	1
Pax-5	289	386	1373	201	1.33564	0.146395	1
Pbx1	205	508	638	174	2.47805	0.272727	1
Pit	2928	124	6865	190	0.0423497	0.0276766	1
PPAR	936	268	9718	2390	0.286325	0.245935	1
PXR	5264	279	7072	281	0.0530015	0.0397342	1
SMAD	1633	179	7031	28	0.109614	0.00398236	1
Sp1	1938	129	4399	212	0.0665635	0.0481928	1
SRF	127	218	3299	44	1.71654	0.0133374	1
SATB1	1065	13024	3351	30078	12.2291	8.97583	1
Stat1	924	1781	1878	37	1.92749	0.0197018	1
Stat3	3175	70	7860	82	0.0220472	0.0104326	1
Stat4	1561	89	5876	217	0.0570147	0.0369299	1
Stat5	5015	69	6567	94	0.0137587	0.014314	1
Stat6	176	303	3822	211	1.72159	0.0552067	1
TCF/LEF	515	687	2849	377	1.33398	0.132327	1
YY1	711	59	854	31	0.0829817	0.0362998	1
TR	330	931	978	736	2.82121	0.752556	1
TFIID	119	559	7519	823	4.69748	0.109456	1
