# Supplementary figures and images for: ERK3/MAPK6 controls IL-8 production and chemotaxis
Source: eLife journal article supplement (doi:10.7554/elife.52511), 2020-04-21

Figure 2

A

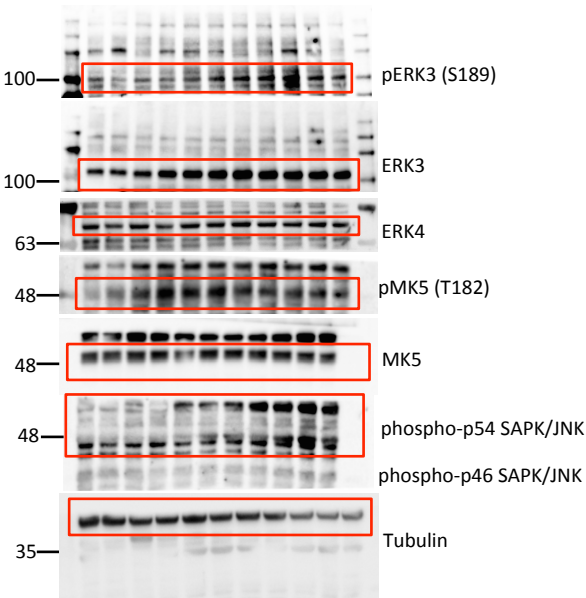

E

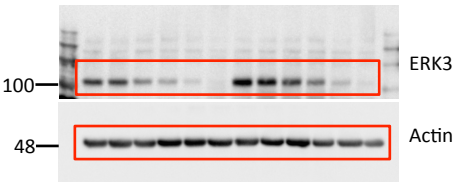

G

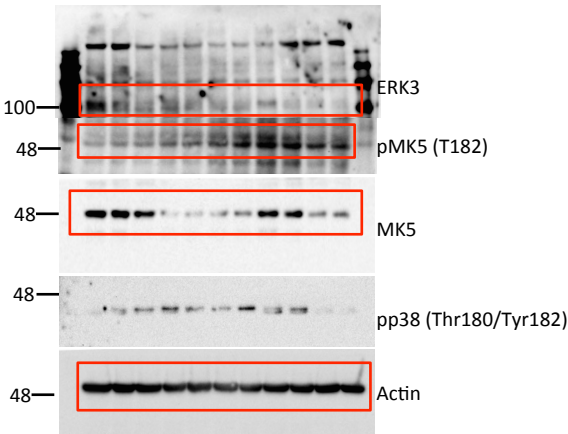

M

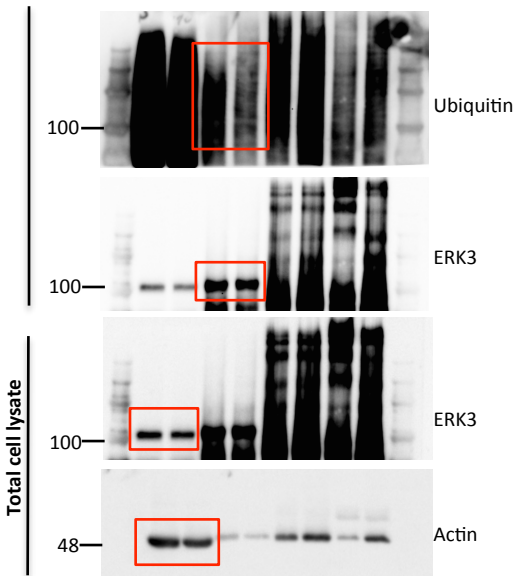

N

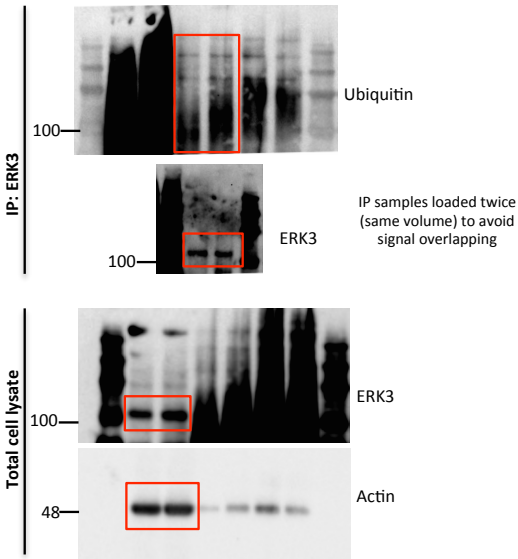

Supplement: supp [file elife-52511-supp-v1.zip › elife_poa_e52511_Figure_2_source_data_1.pdf]

Figure 7

A

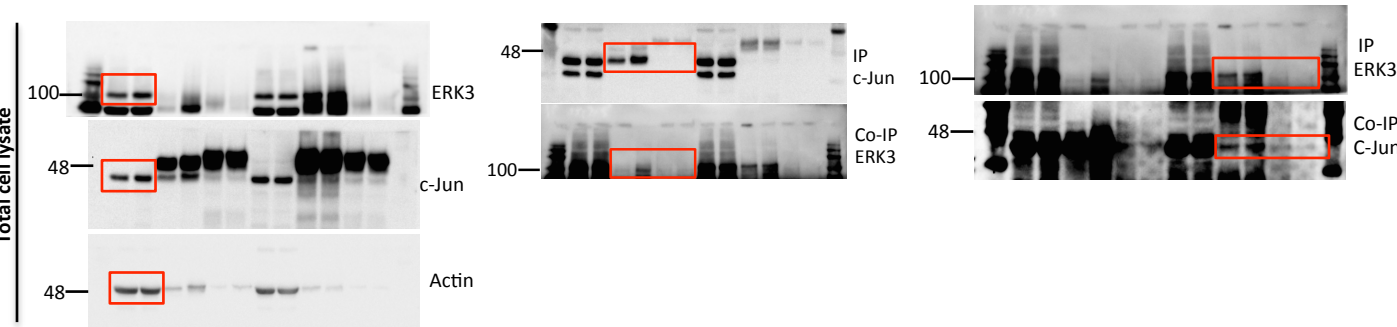

C

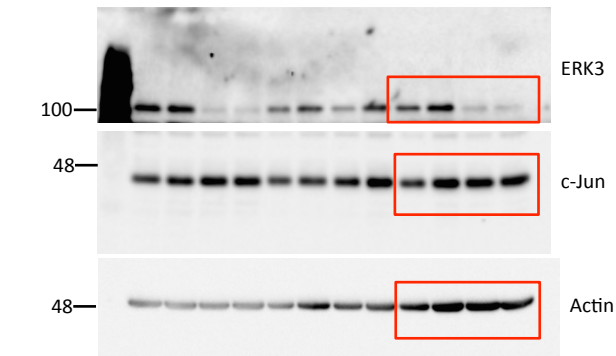

Supplement: supp [file elife-52511-supp-v1.zip › elife_poa_e52511_Figure_7_source_data_1.pdf]

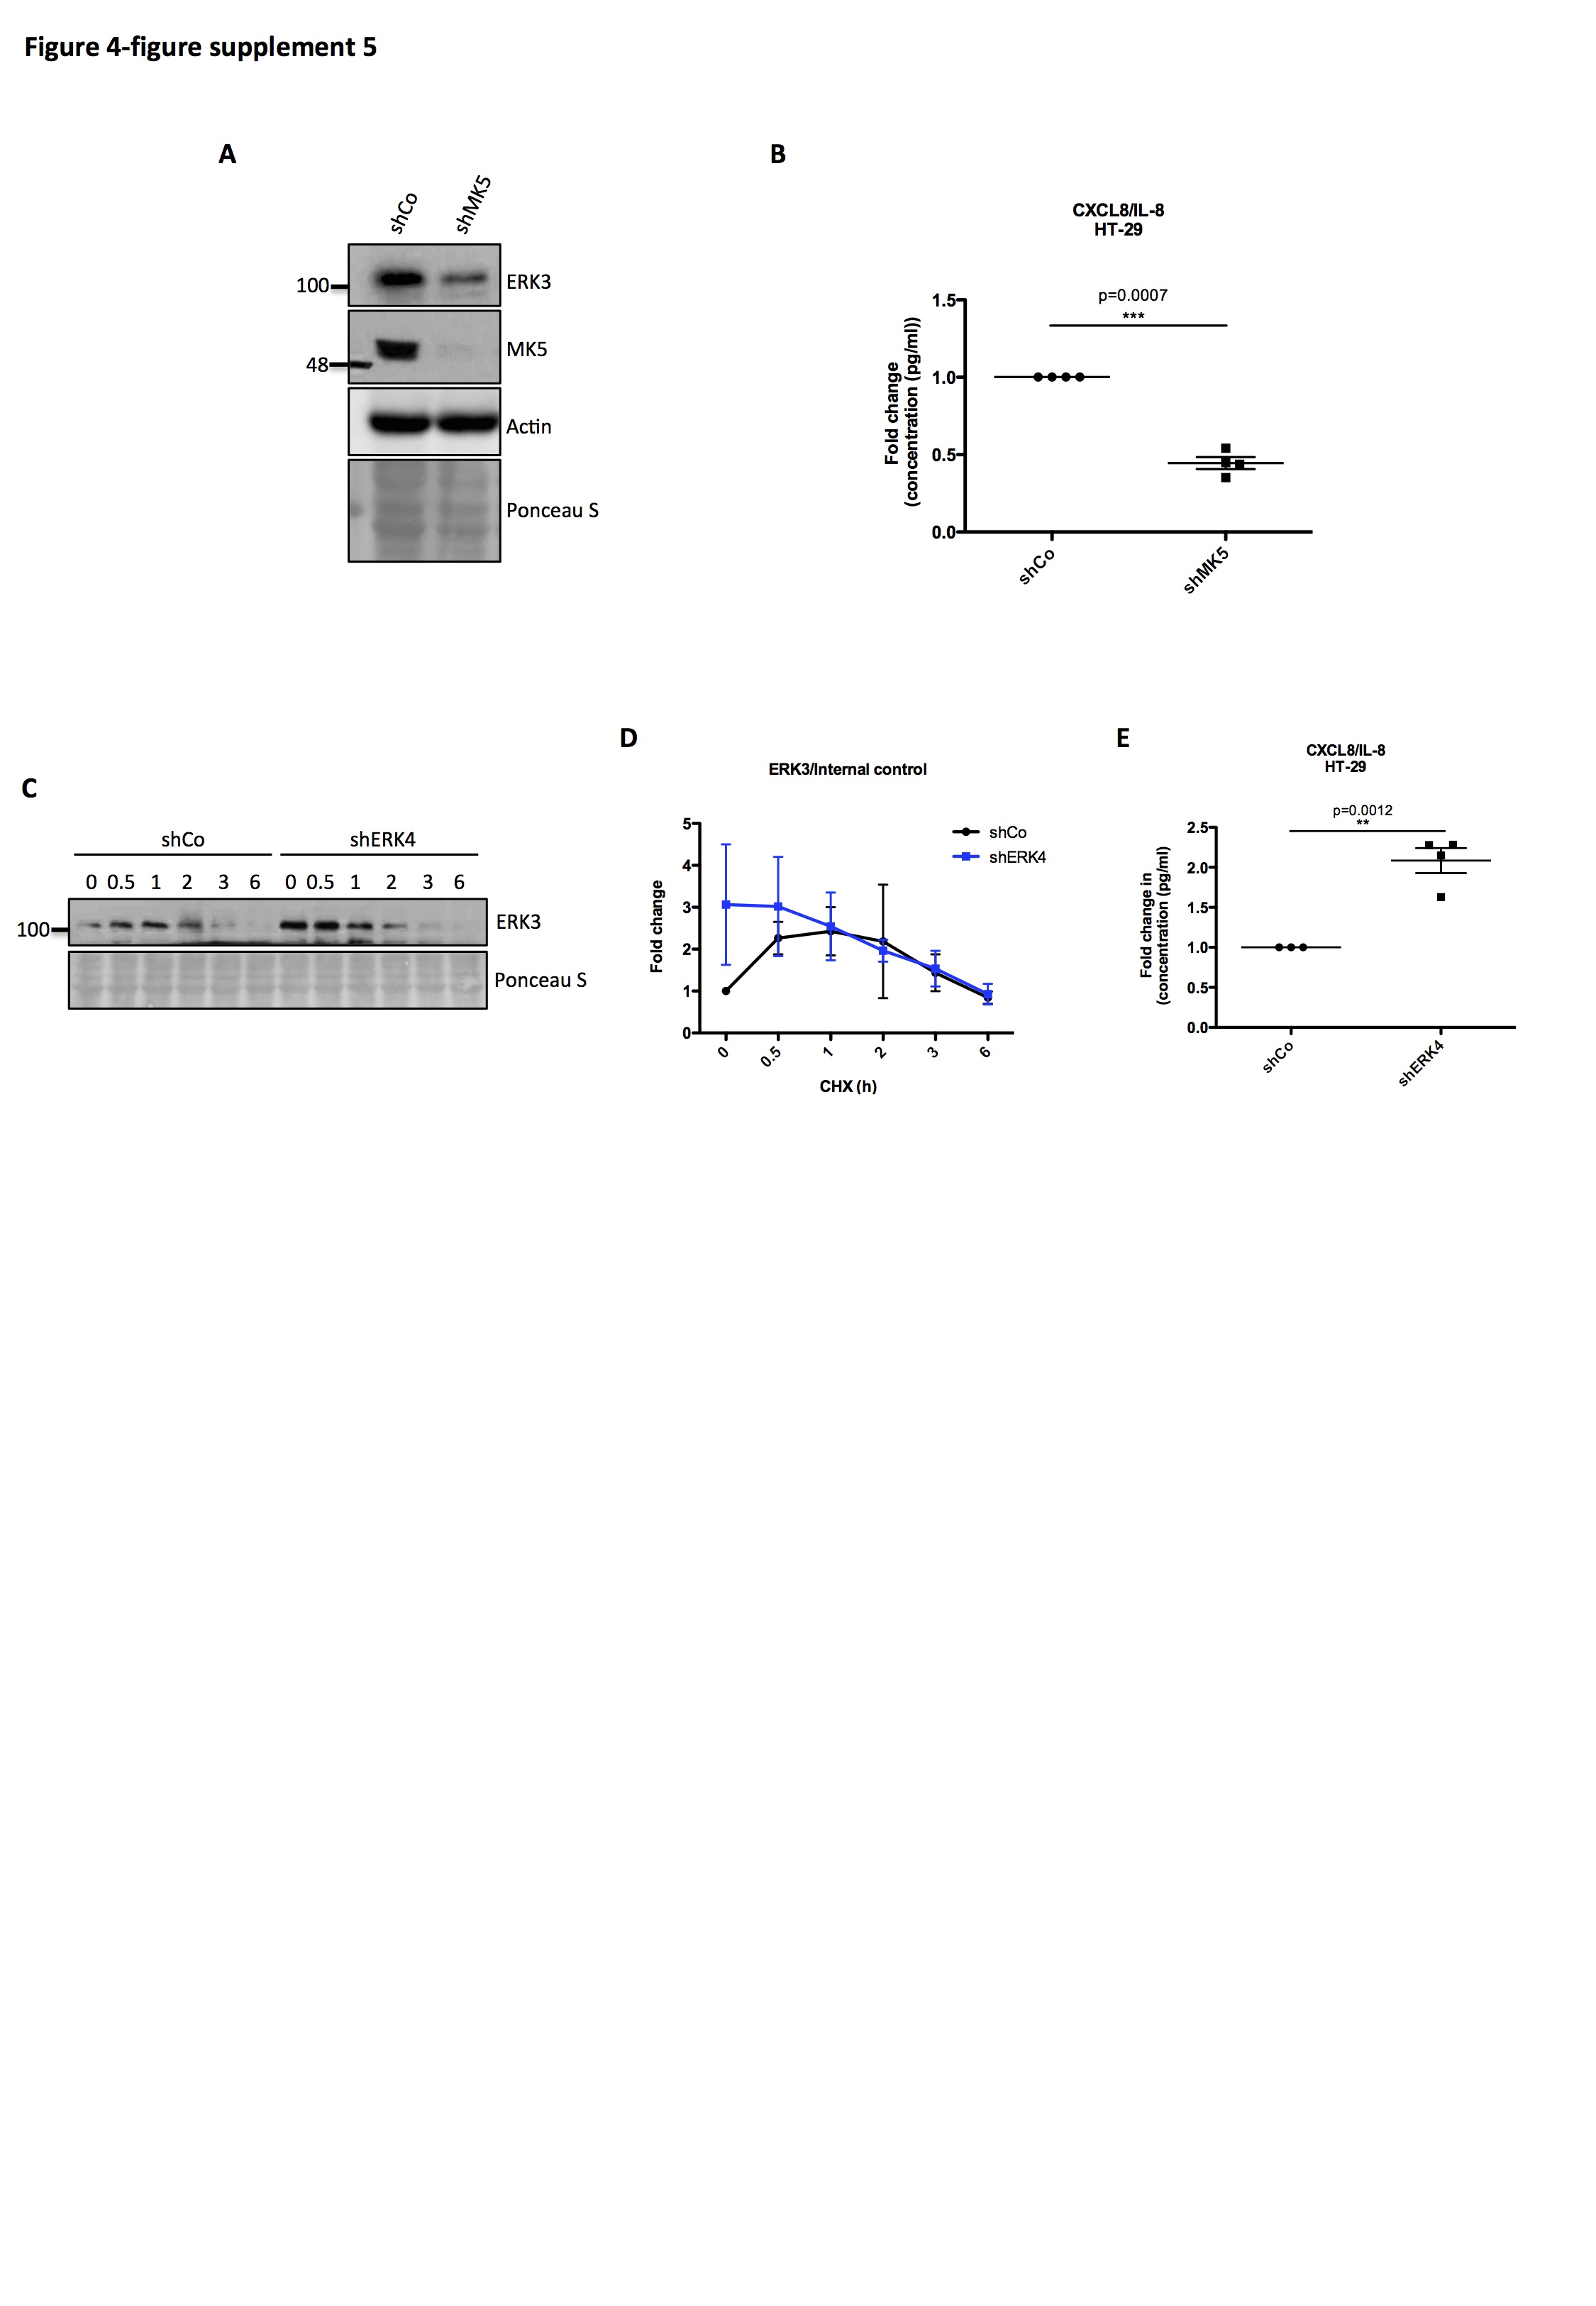

Supplement: supp [file elife-52511-supp-v1.zip › elife_poa_e52511_Figure_4_figure_supplement_5.jpg]

Figure 2-figure supplement 2

**A**

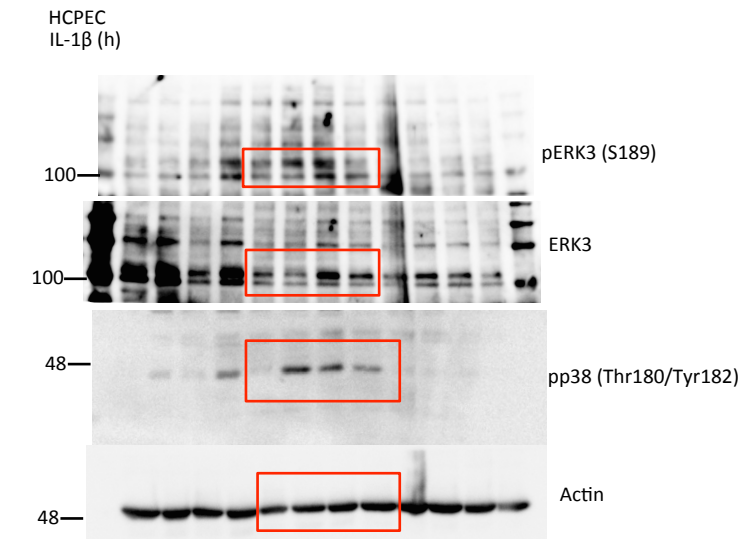

**B**

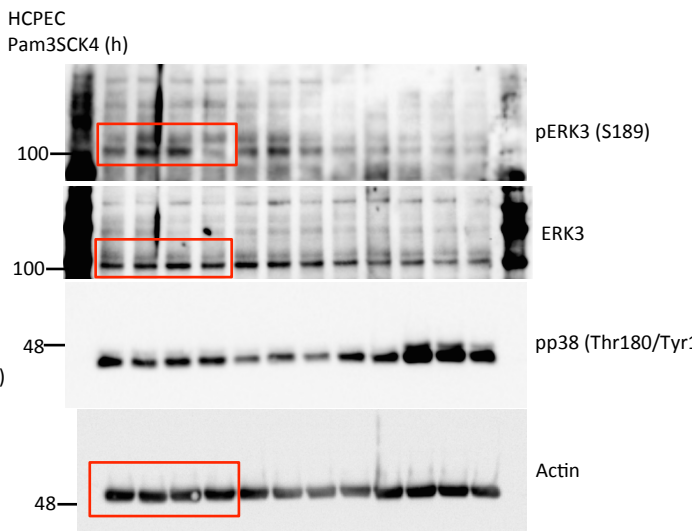

**C**

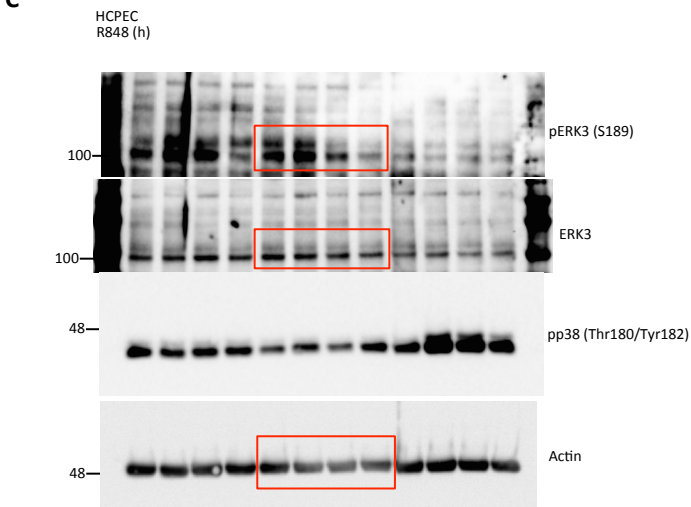

**D**

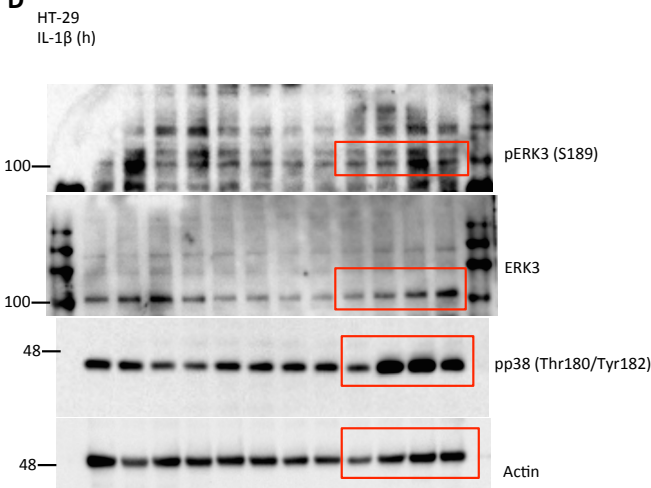

**E**

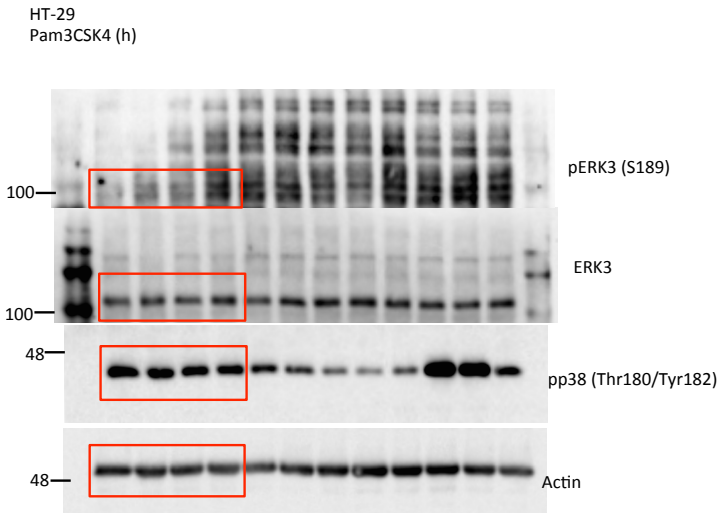

**F**

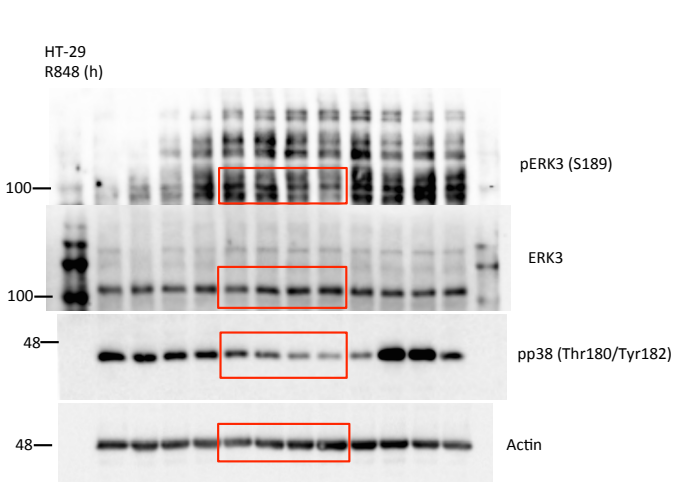

Supplement: supp [file elife-52511-supp-v1.zip › elife_poa_e52511_Figure_2_figure_supplement_2_source_data_1.pdf]

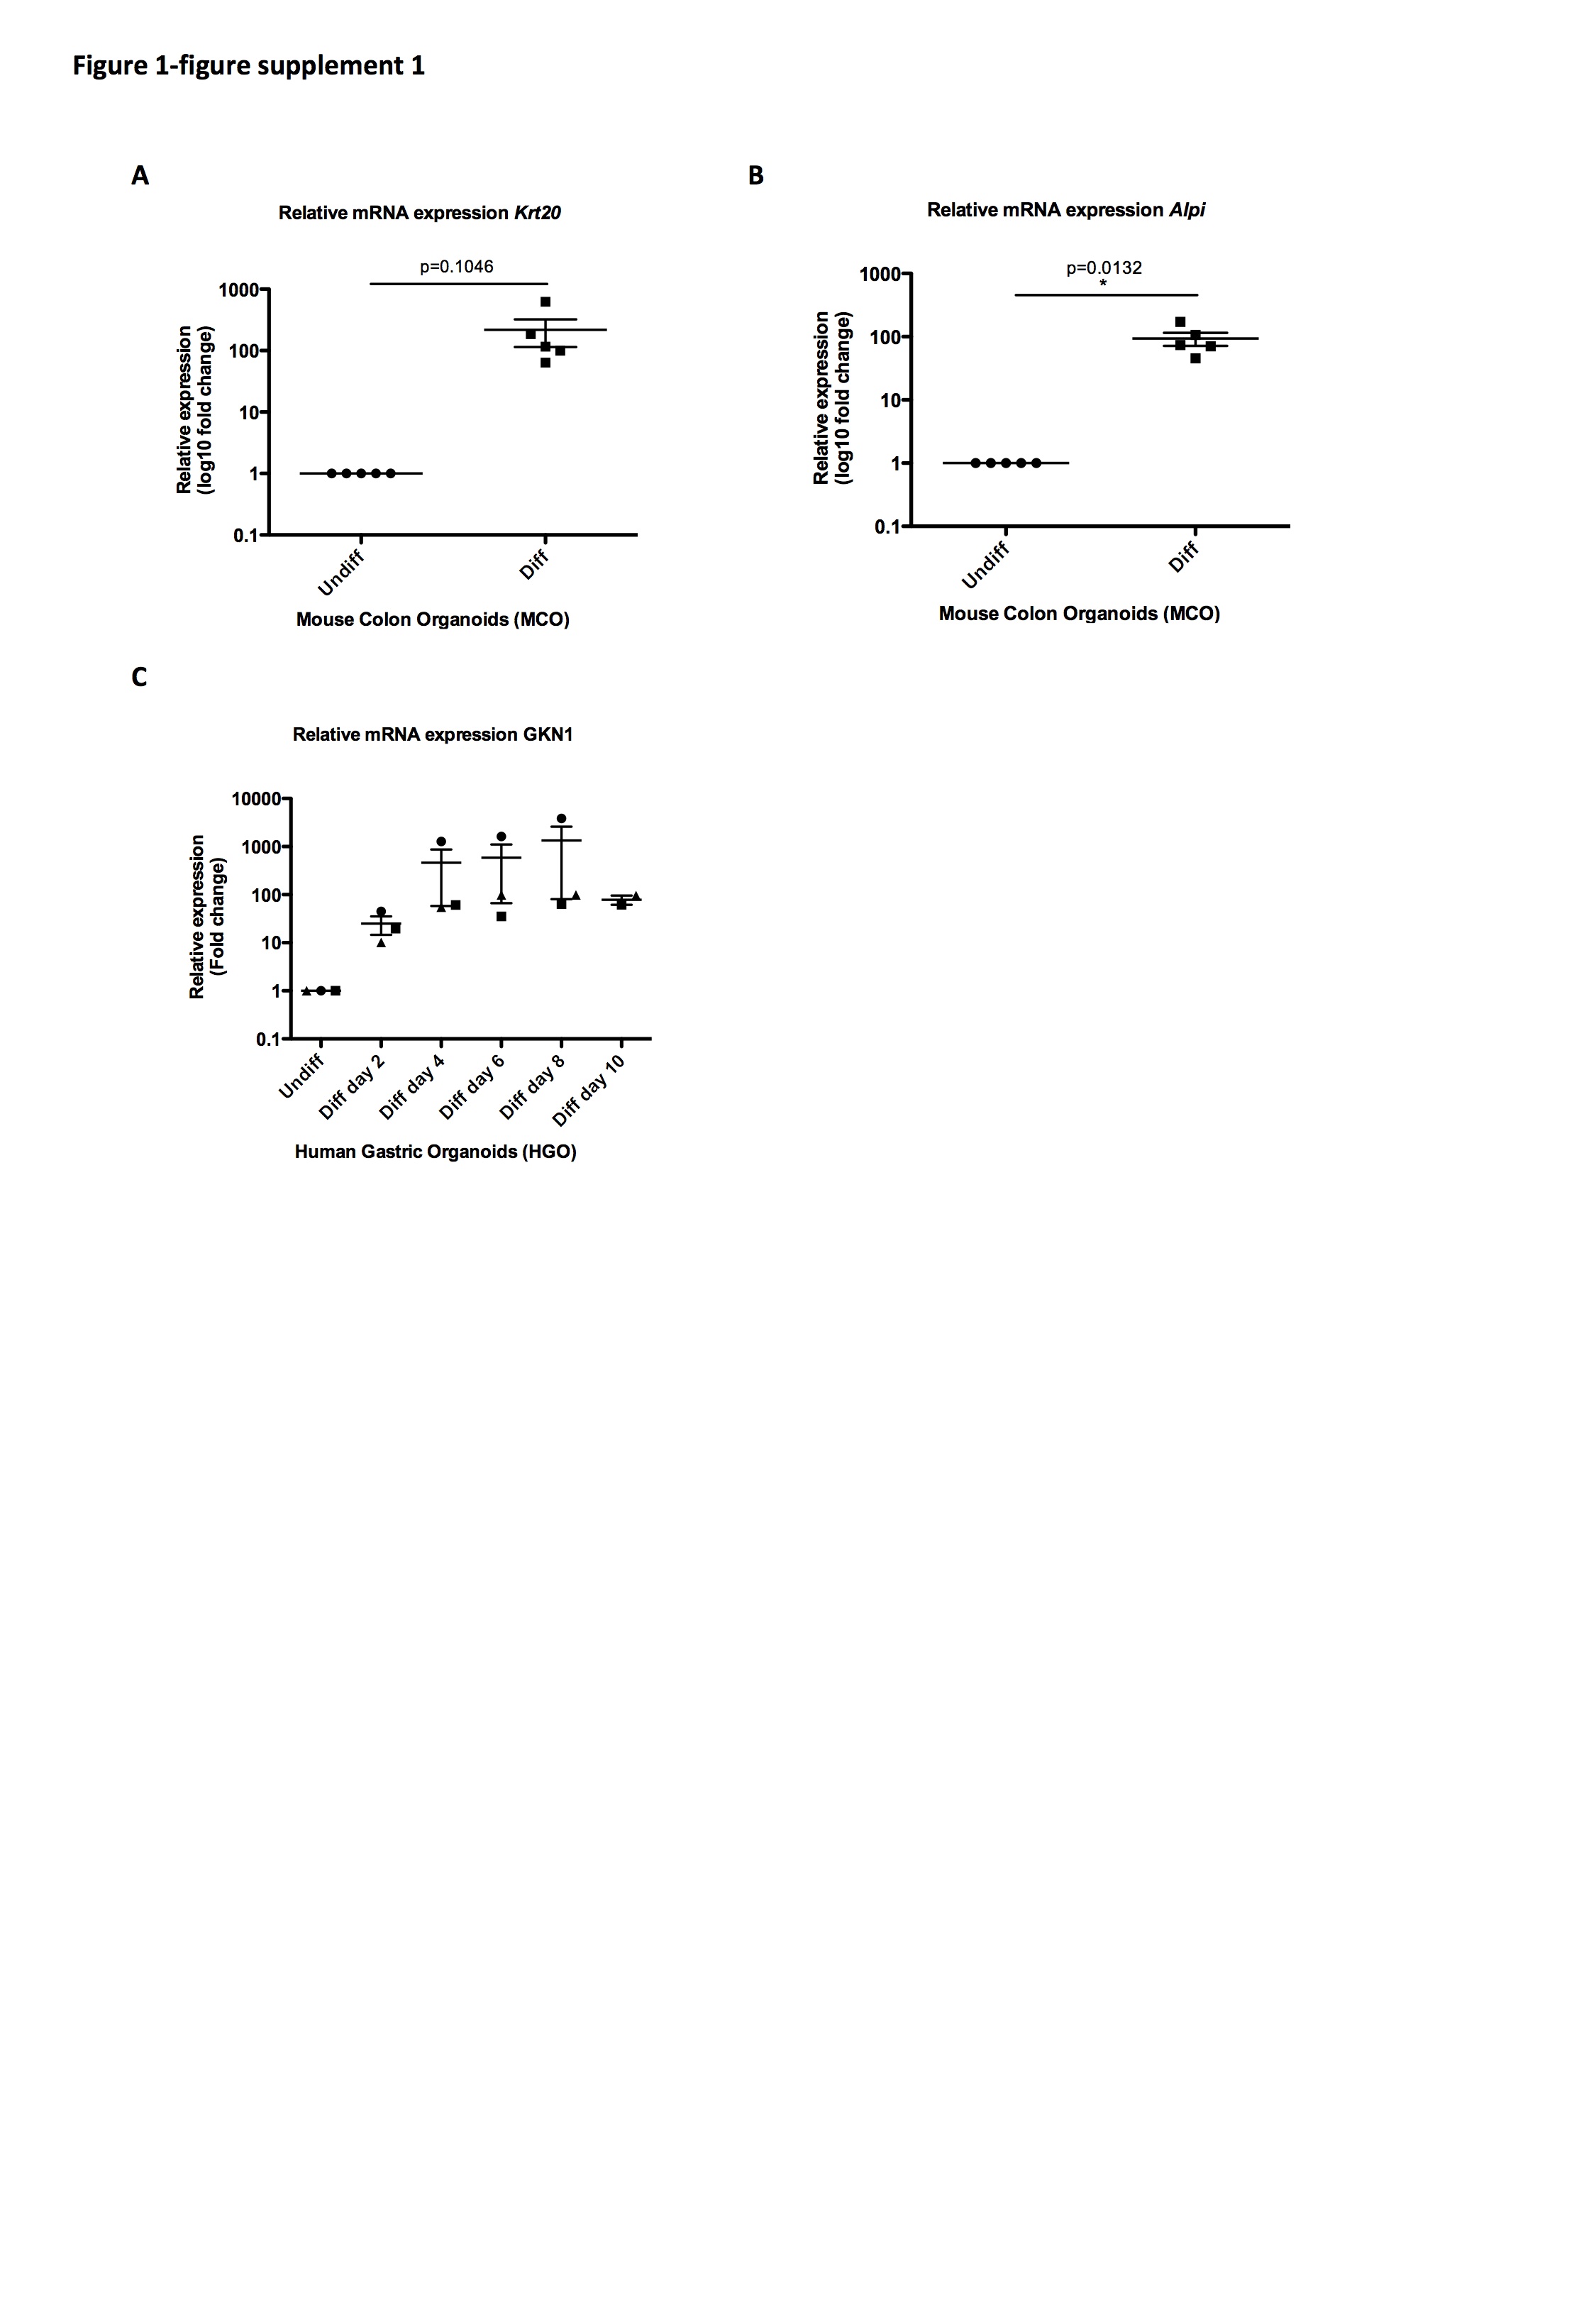

Supplement: supp [file elife-52511-supp-v1.zip › elife_poa_e52511_Figure_1_figure_supplement_1.jpg]

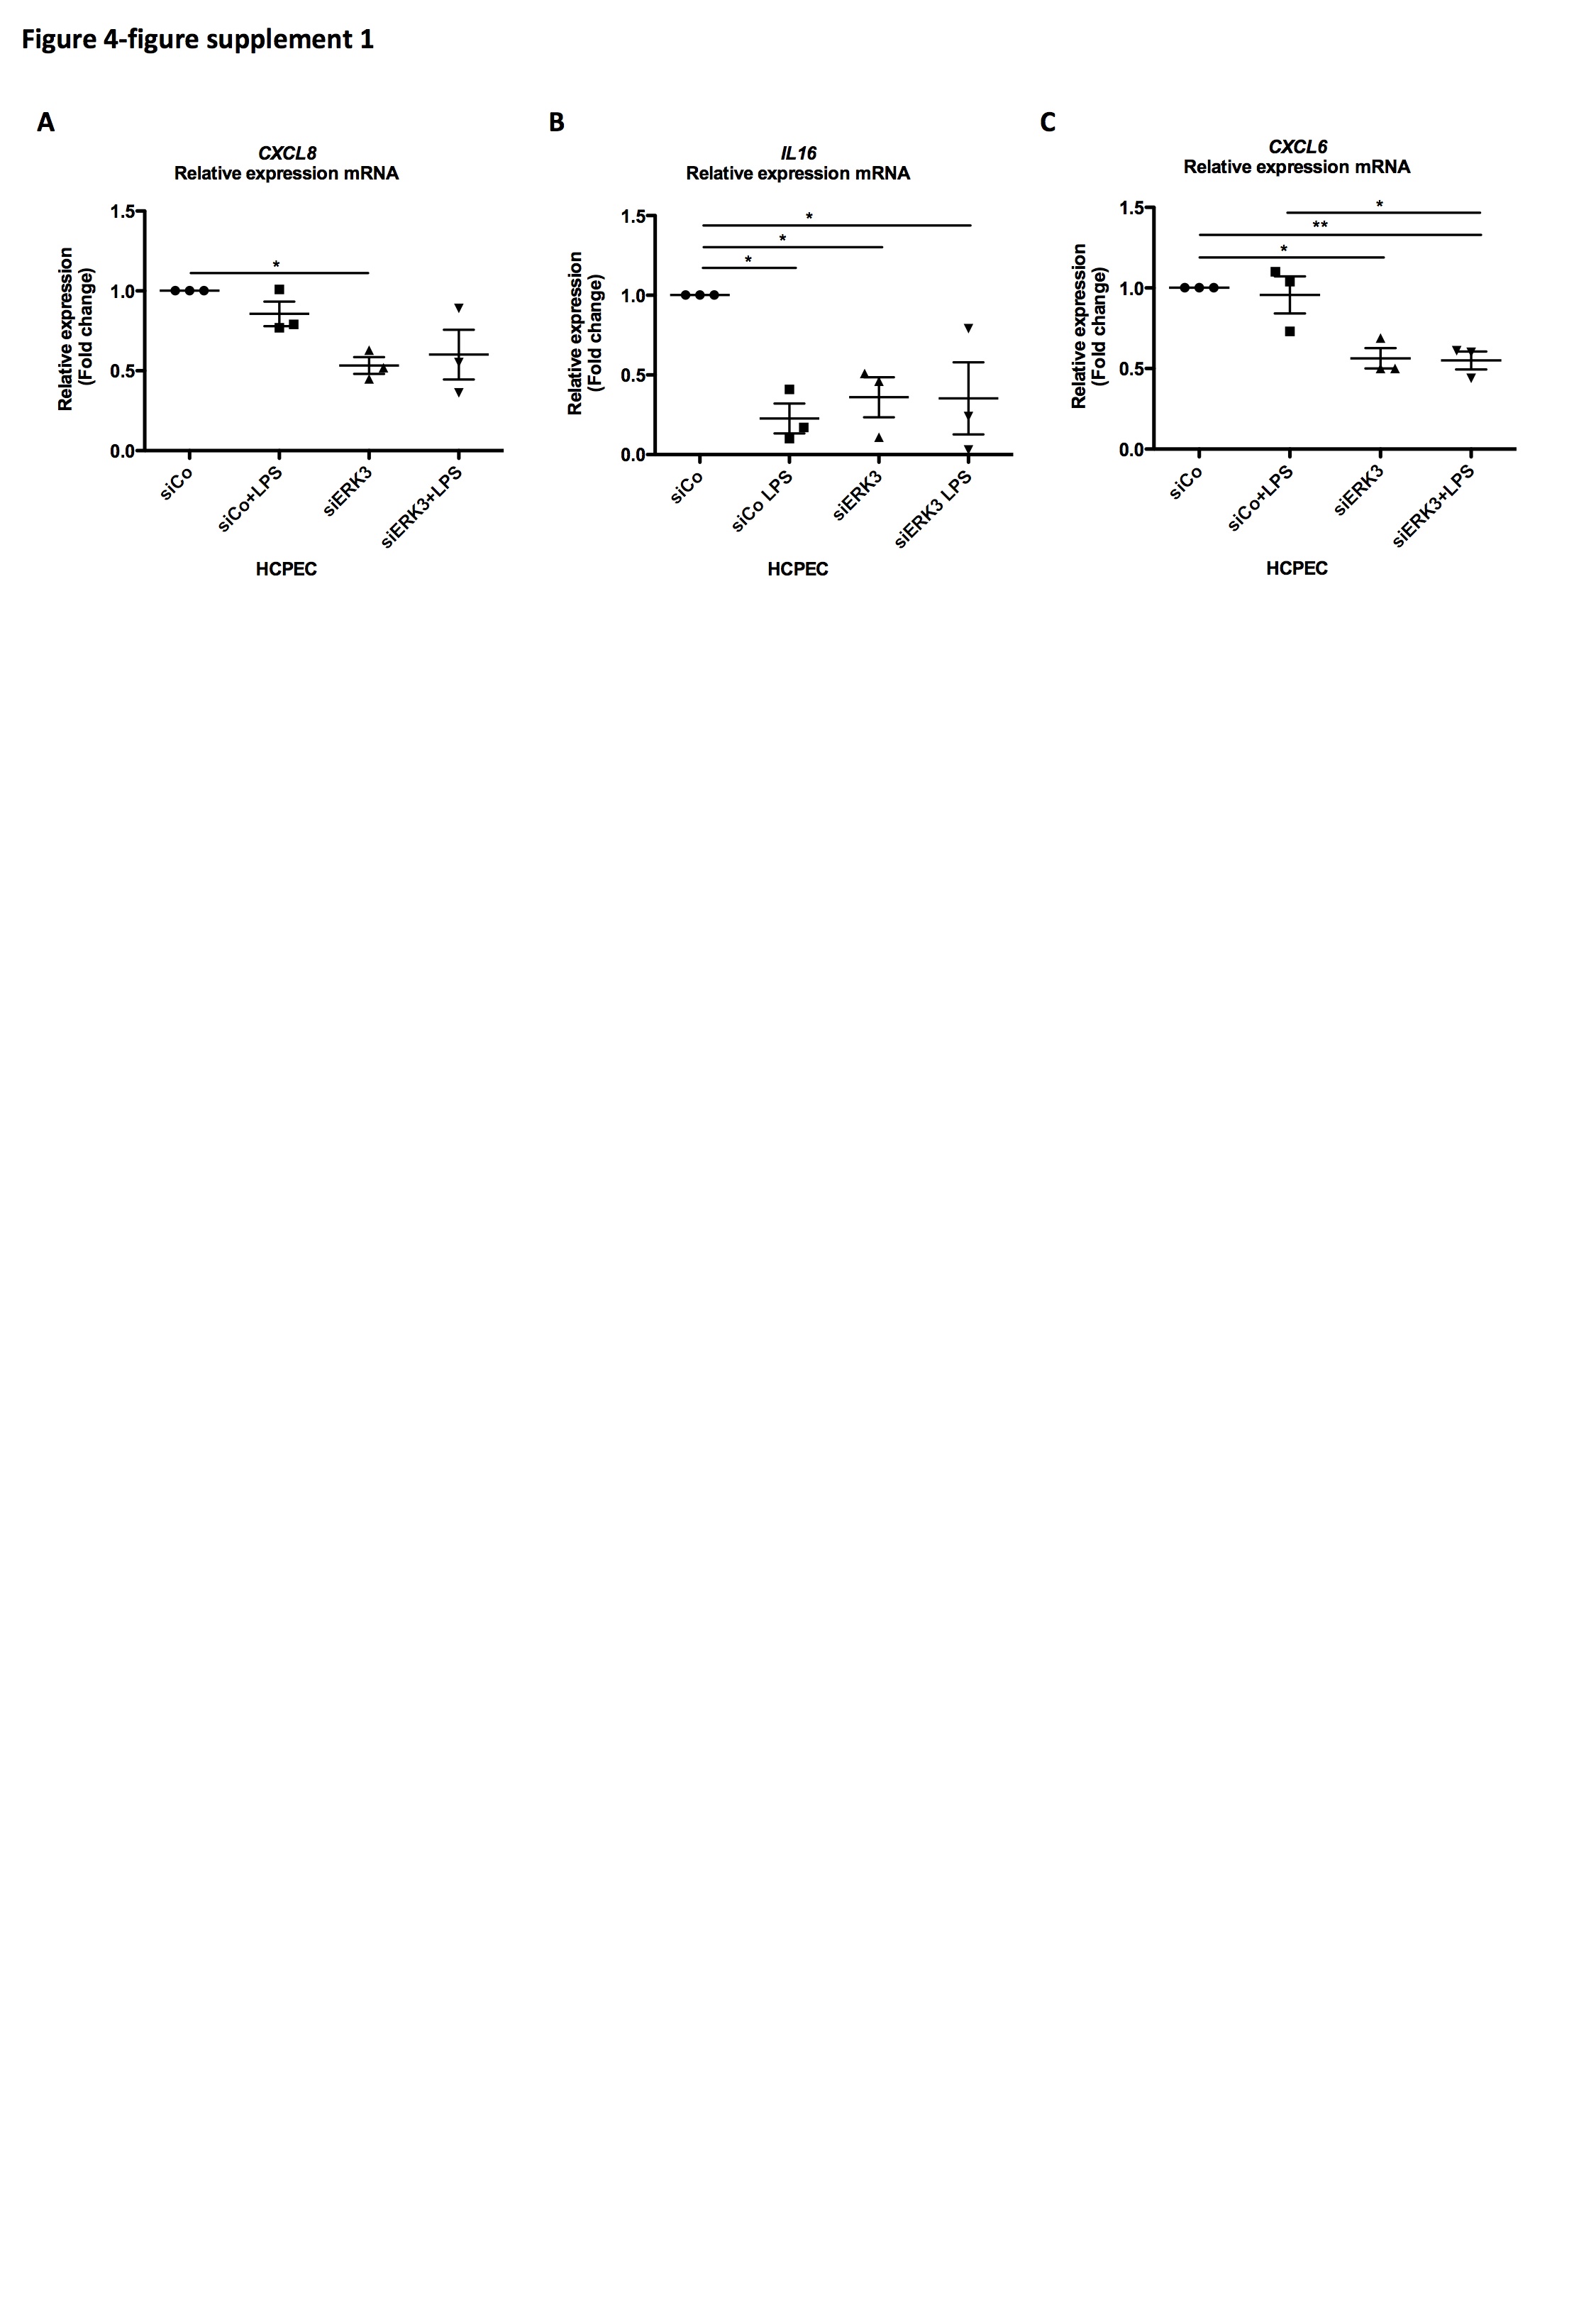

Supplement: supp [file elife-52511-supp-v1.zip › elife_poa_e52511_Figure_4_figure_supplement_1.jpg]

Figure 2-figure supplement 1

A

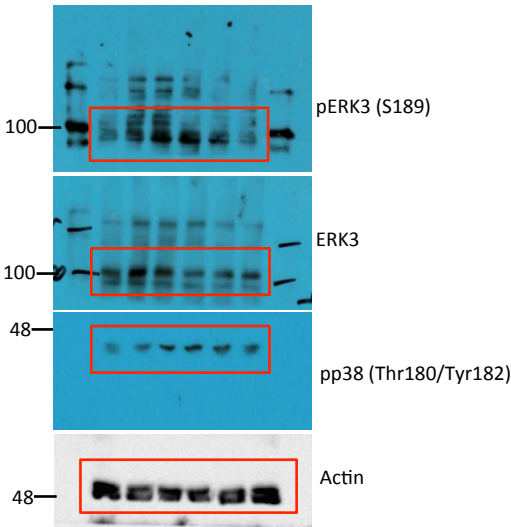

Supplement: supp [file elife-52511-supp-v1.zip › elife_poa_e52511_Figure_2_figure_supplement_1_source_data_1.pdf]

Figure 4-figure supplement 3

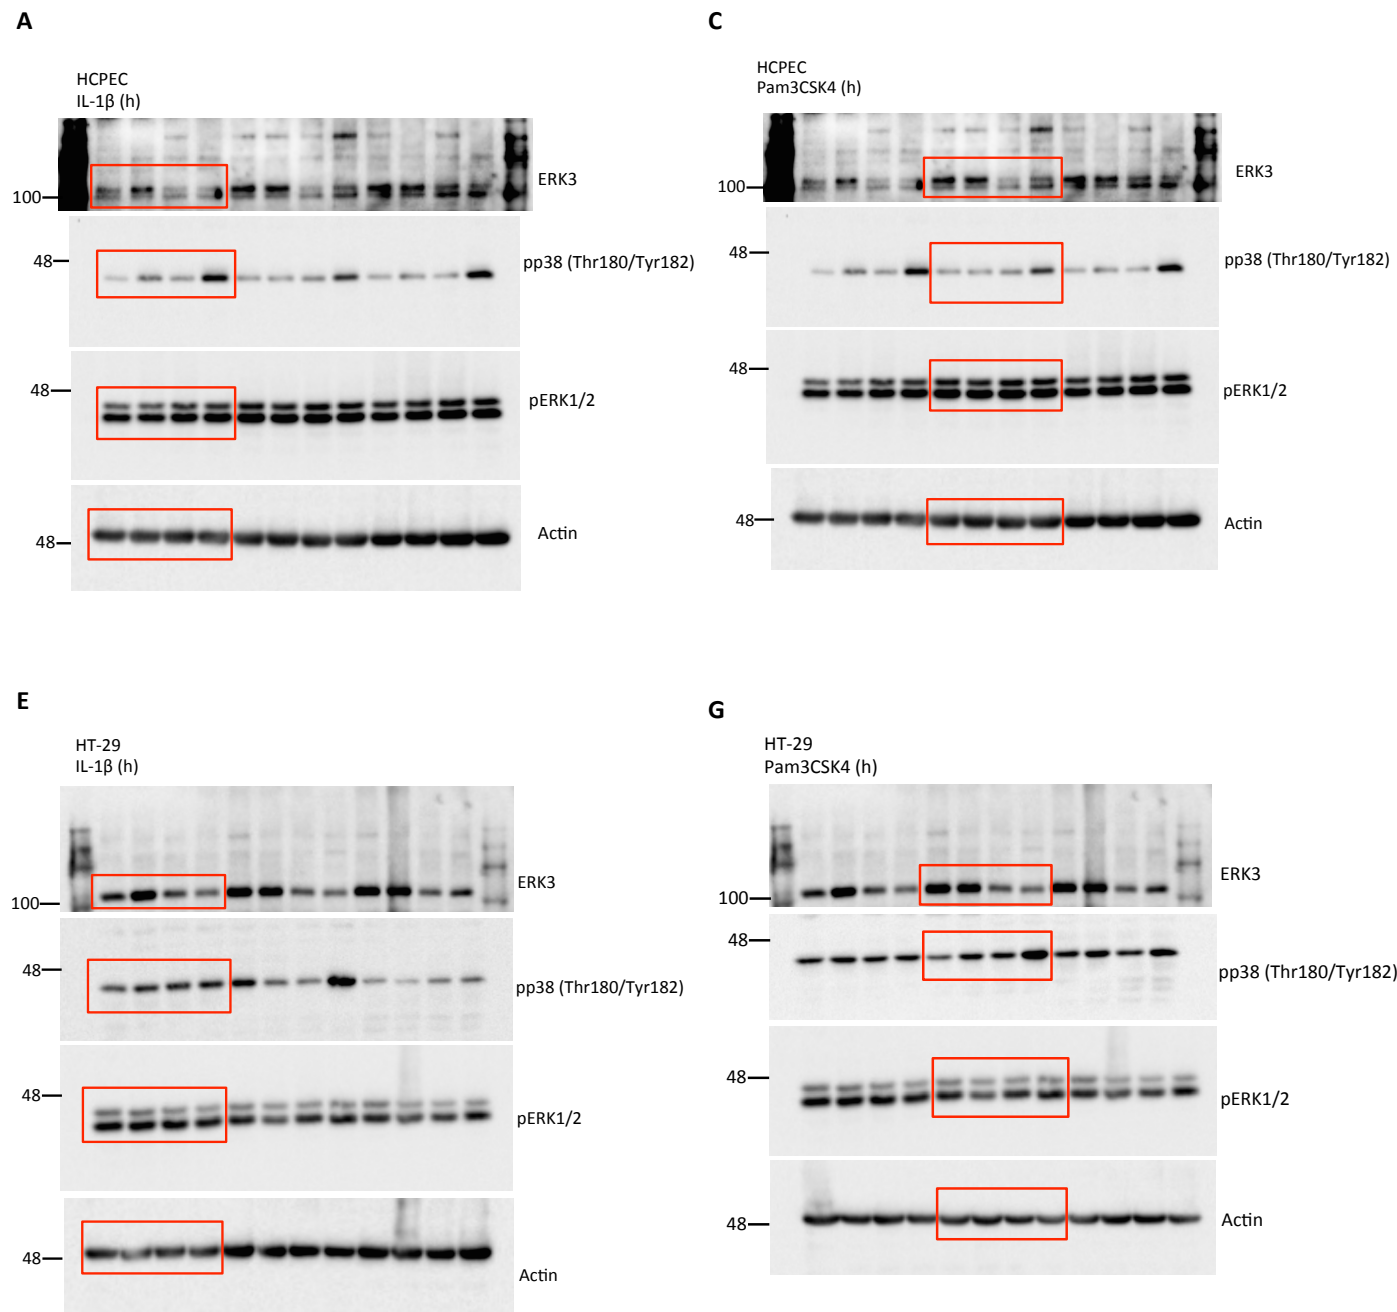

Supplement: supp [file elife-52511-supp-v1.zip › elife_poa_e52511_Figure_4_figure_supplement_3_source_data_1.pdf]

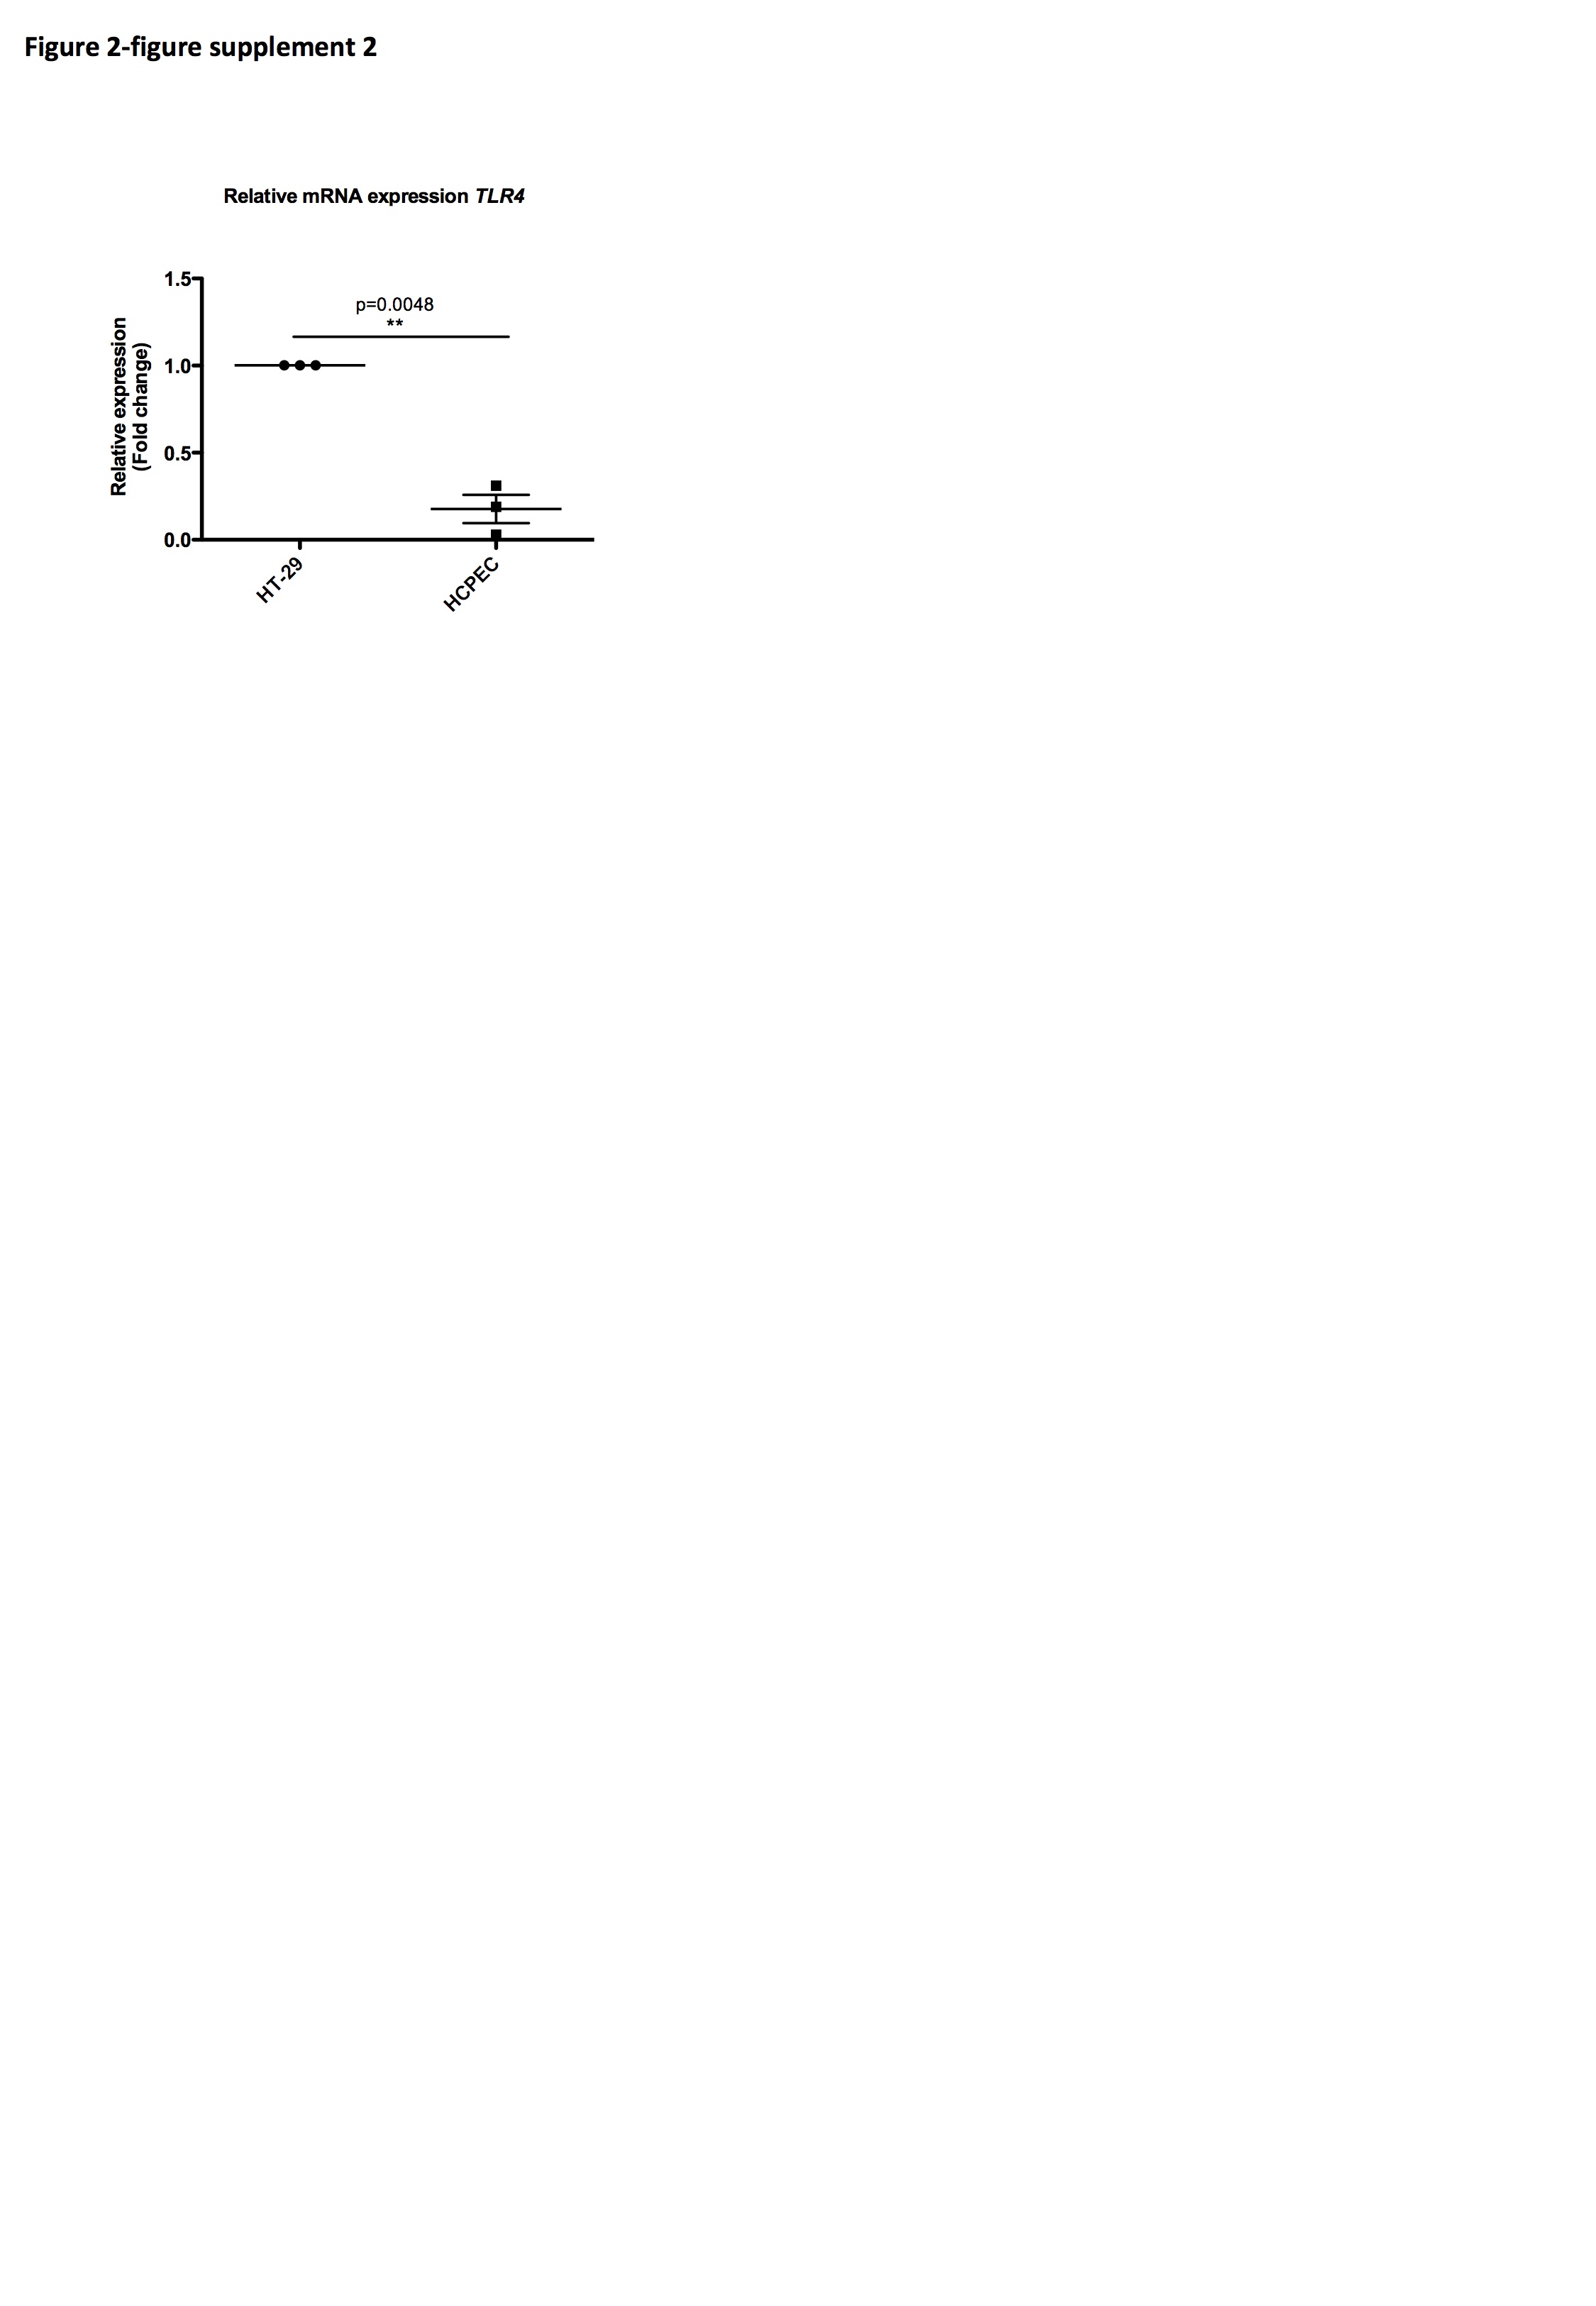

Supplement: supp [file elife-52511-supp-v1.zip › elife_poa_e52511_Figure_2_figure_supplement_2.jpg]

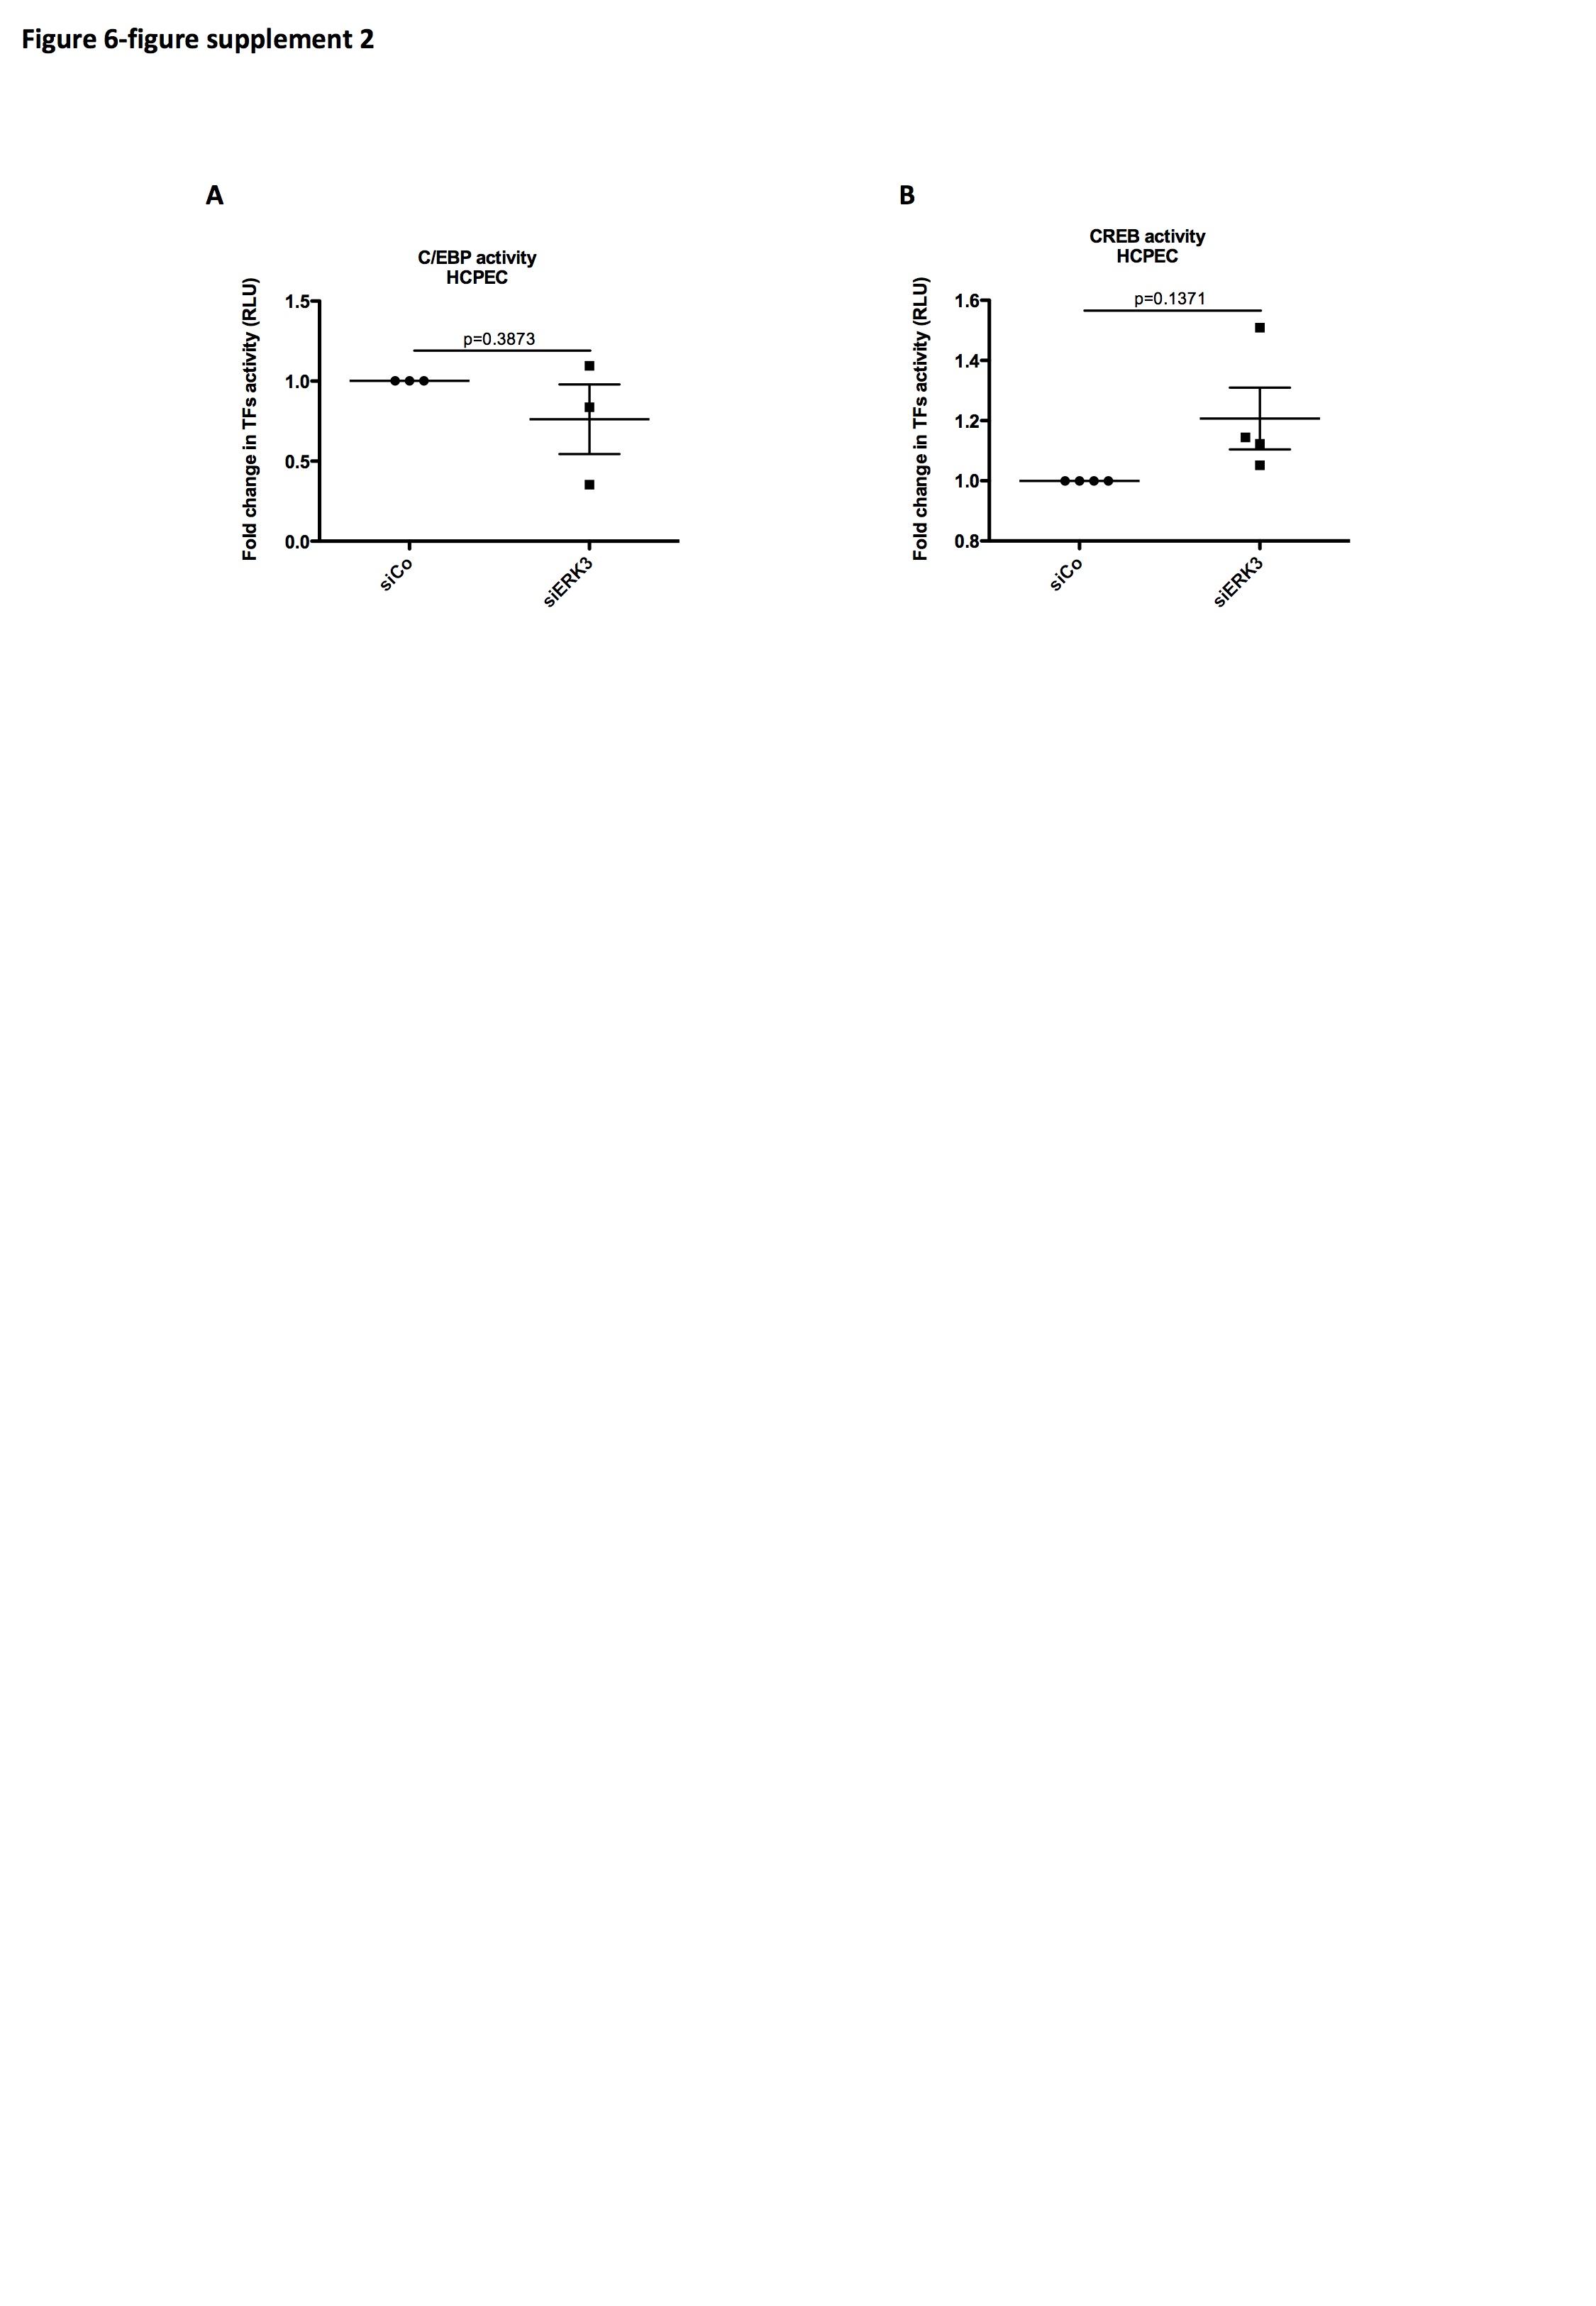

Supplement: supp [file elife-52511-supp-v1.zip › elife_poa_e52511_Figure_6_figure_supplement_2.jpg]

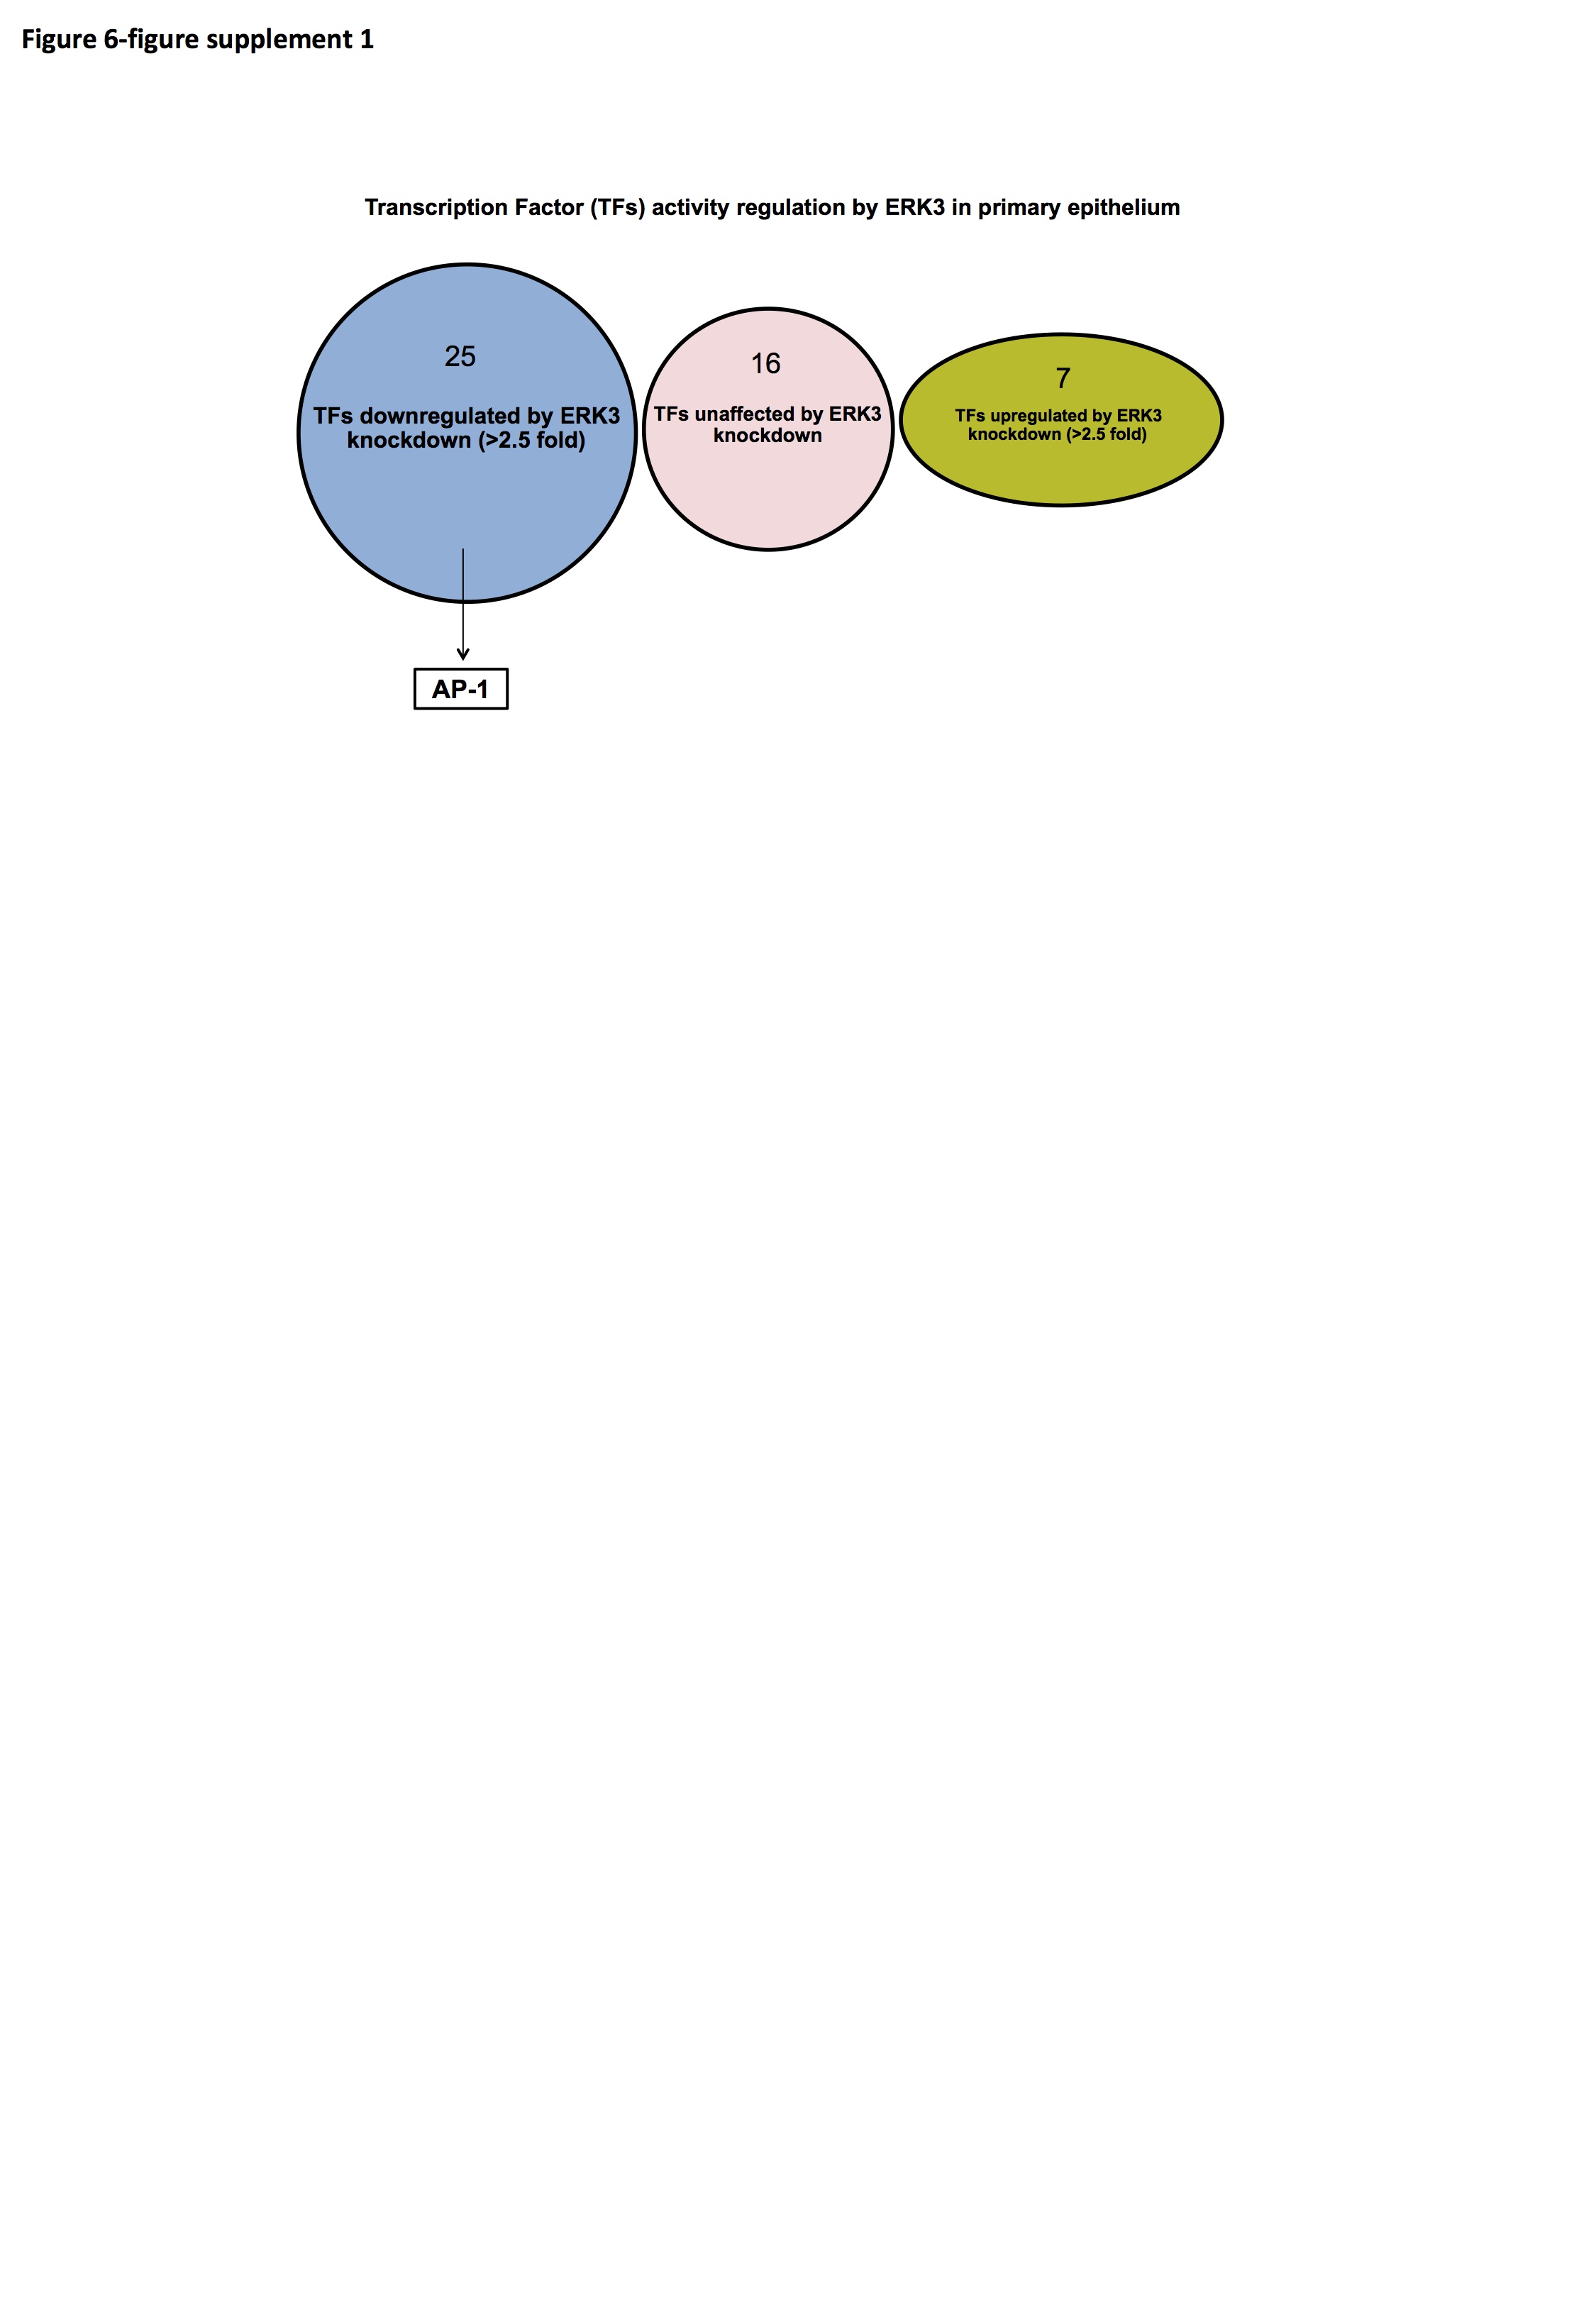

Supplement: supp [file elife-52511-supp-v1.zip › elife_poa_e52511_Figure_6_figure_supplement_1.jpg]

Figure 7-figure supplement 1

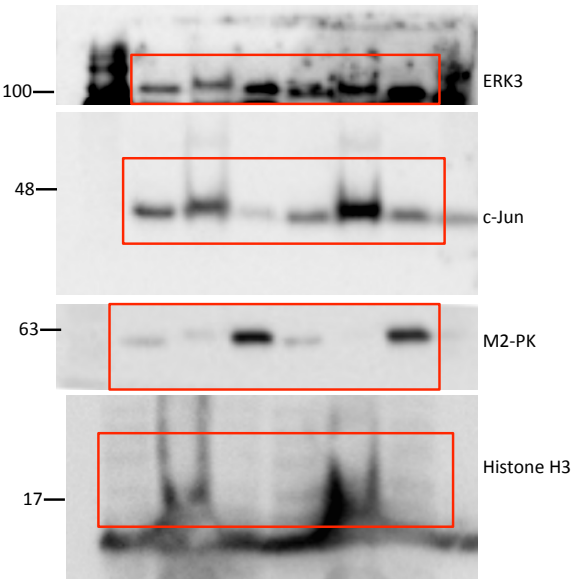

Supplement: supp [file elife-52511-supp-v1.zip › elife_poa_e52511_Figure_7_figure_supplement_1_source_data_1.pdf]

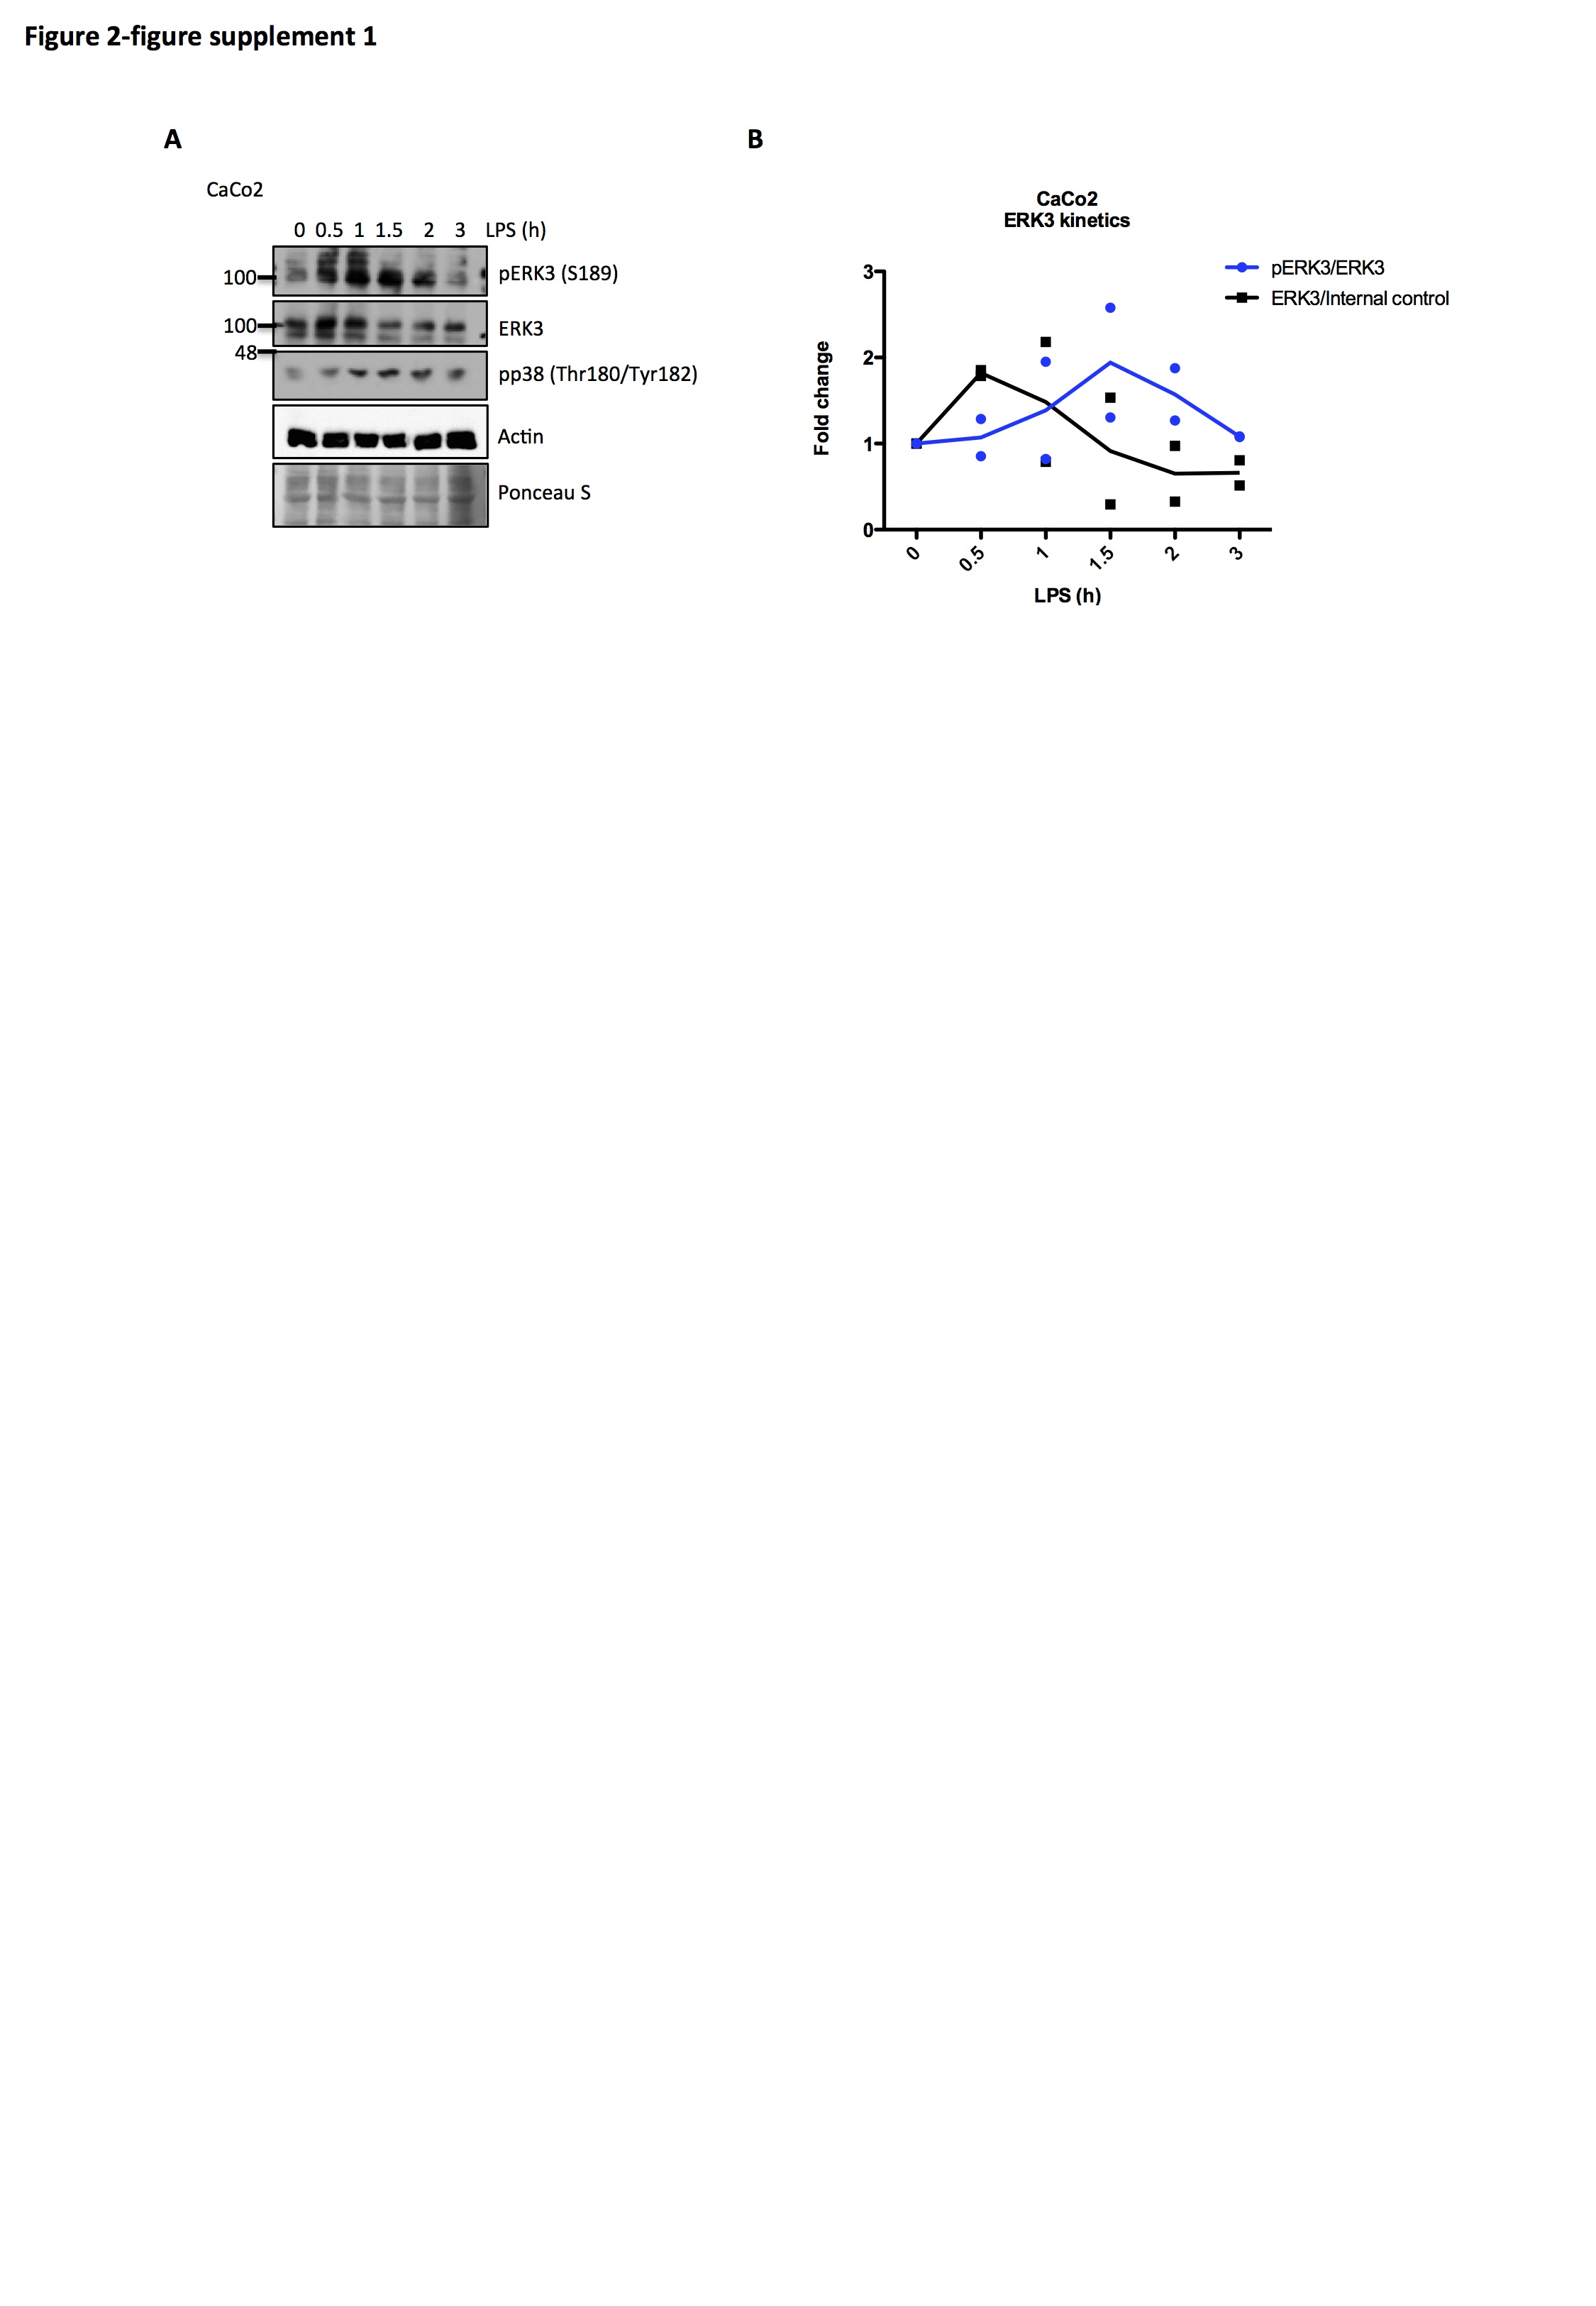

Supplement: supp [file elife-52511-supp-v1.zip › elife_poa_e52511_Figure_2_figure_supplement_1.jpg]

Figure 6

A

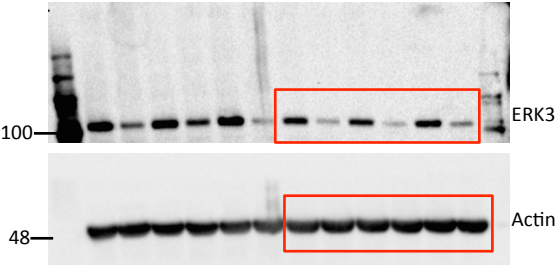

Supplement: supp [file elife-52511-supp-v1.zip › elife_poa_e52511_Figure_6_source_data_1.pdf]

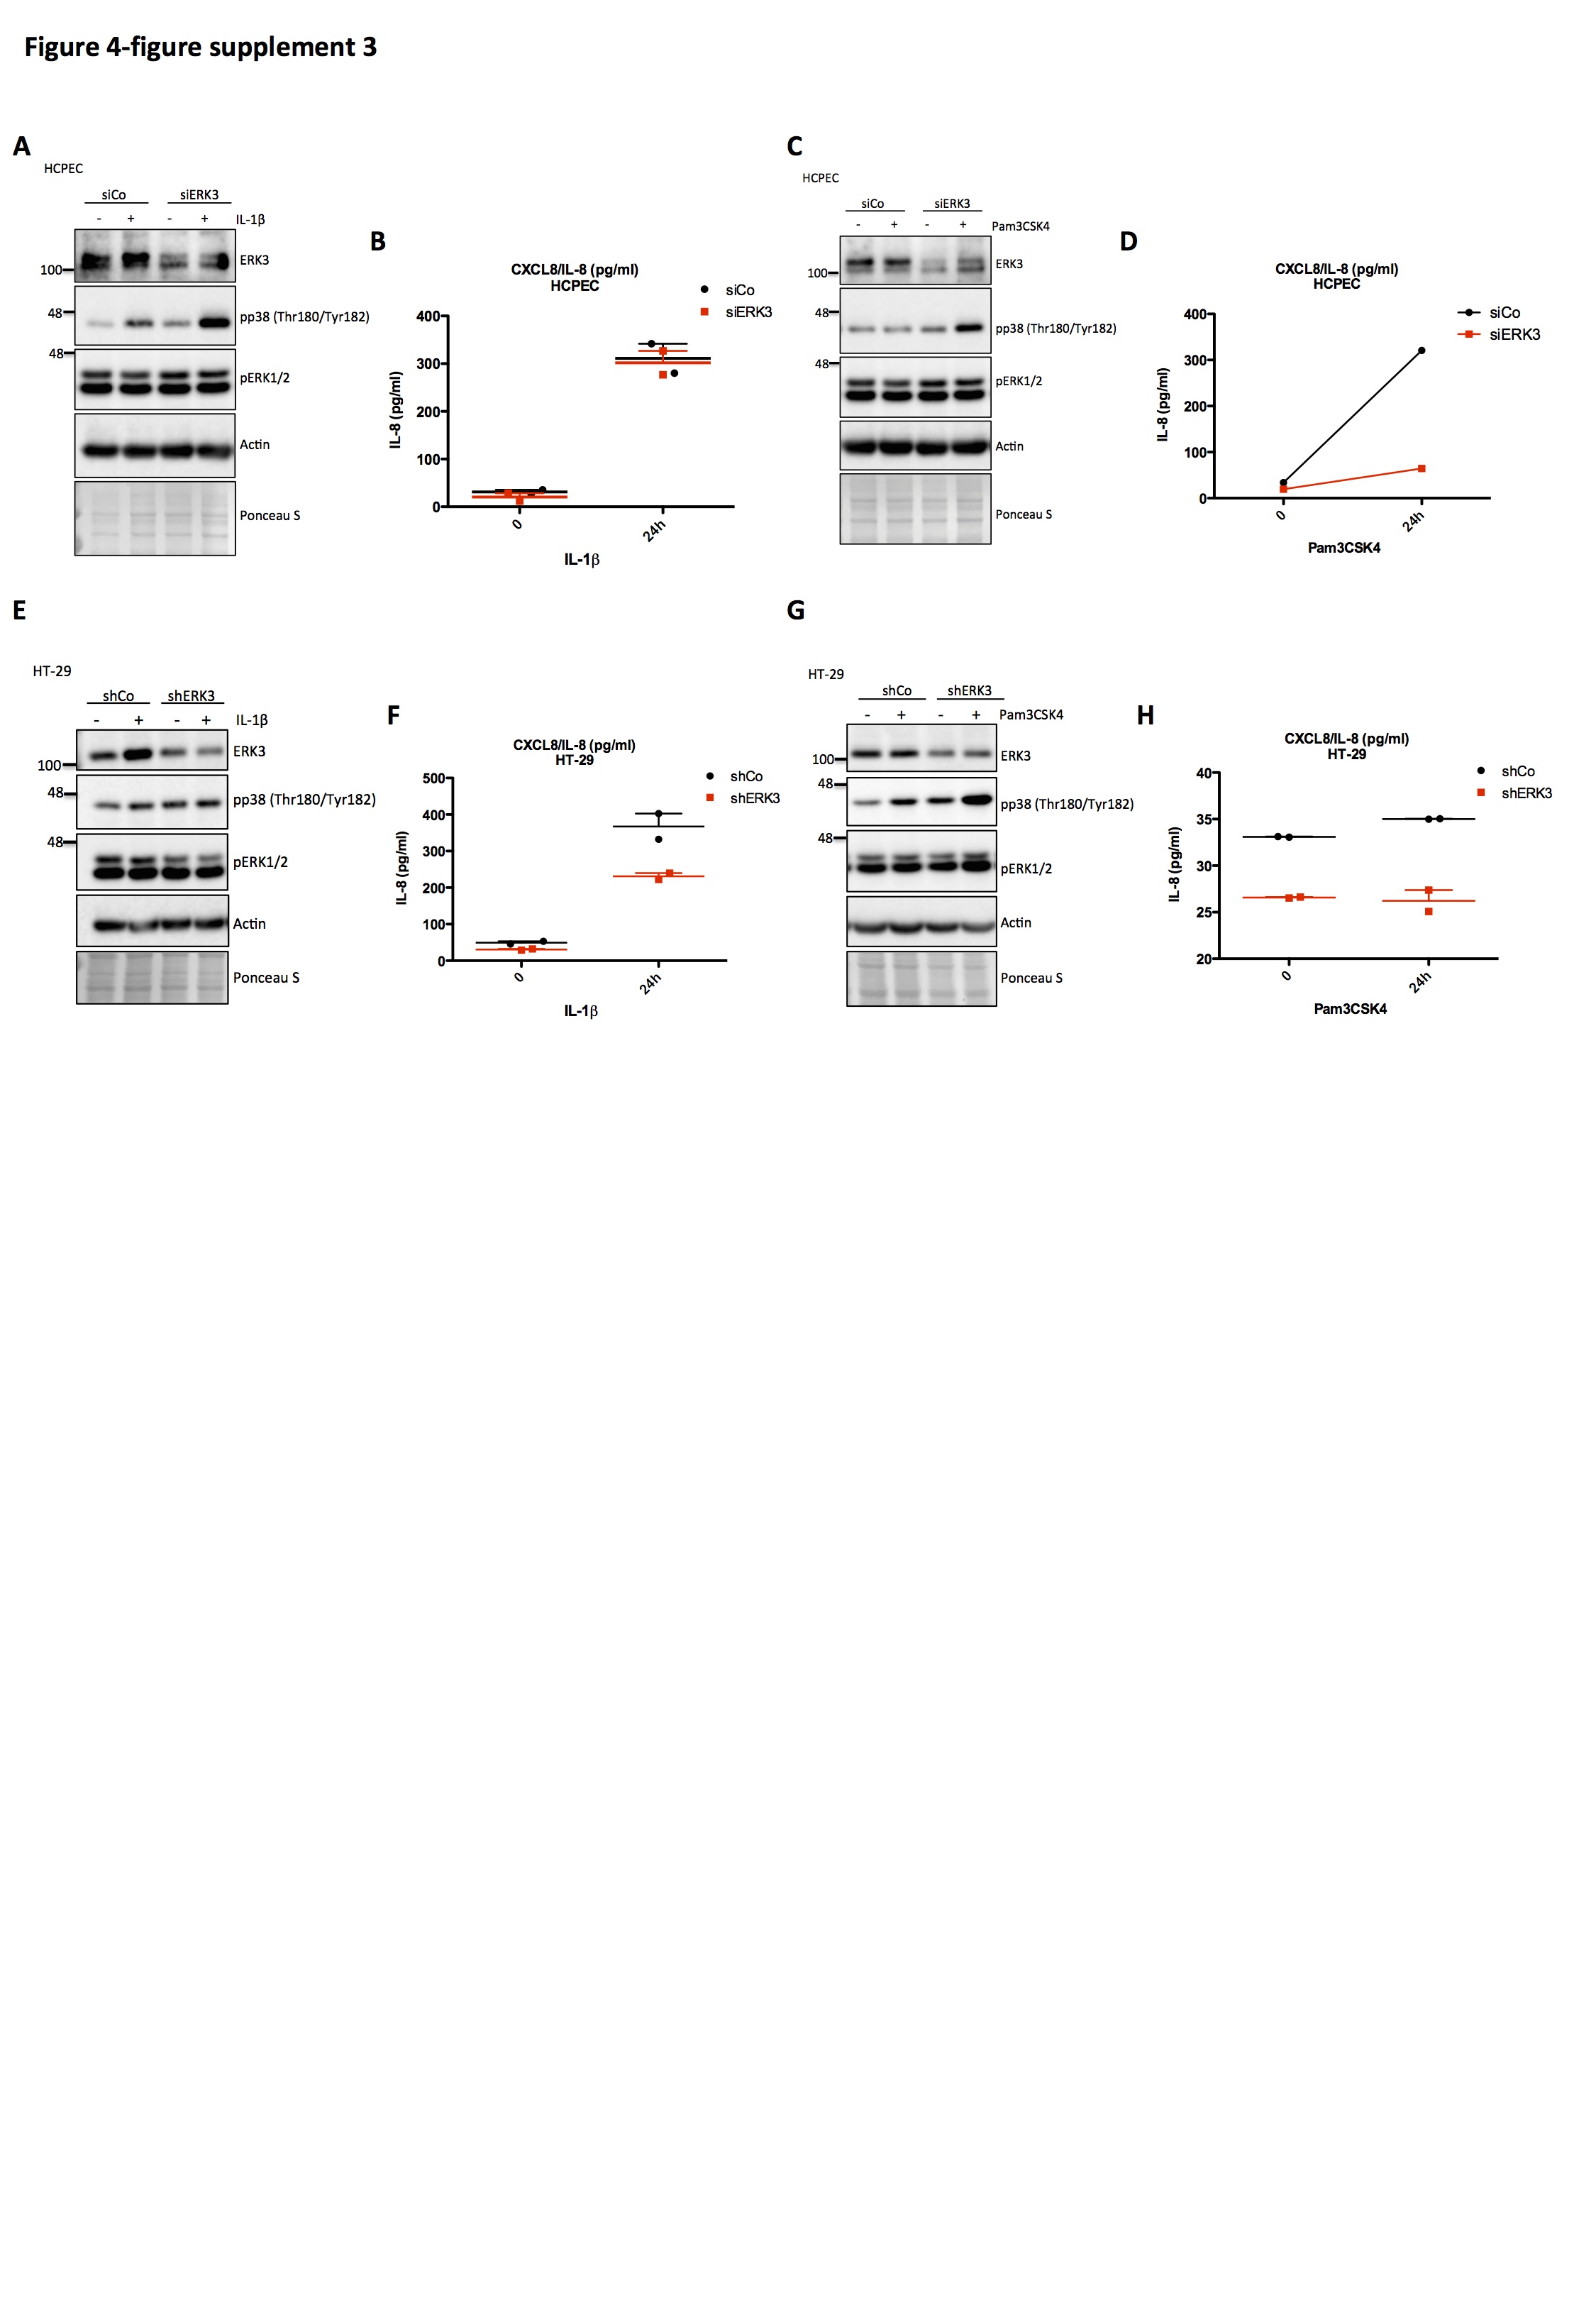

Supplement: supp [file elife-52511-supp-v1.zip › elife_poa_e52511_Figure_4_figure_supplement_3.jpg]

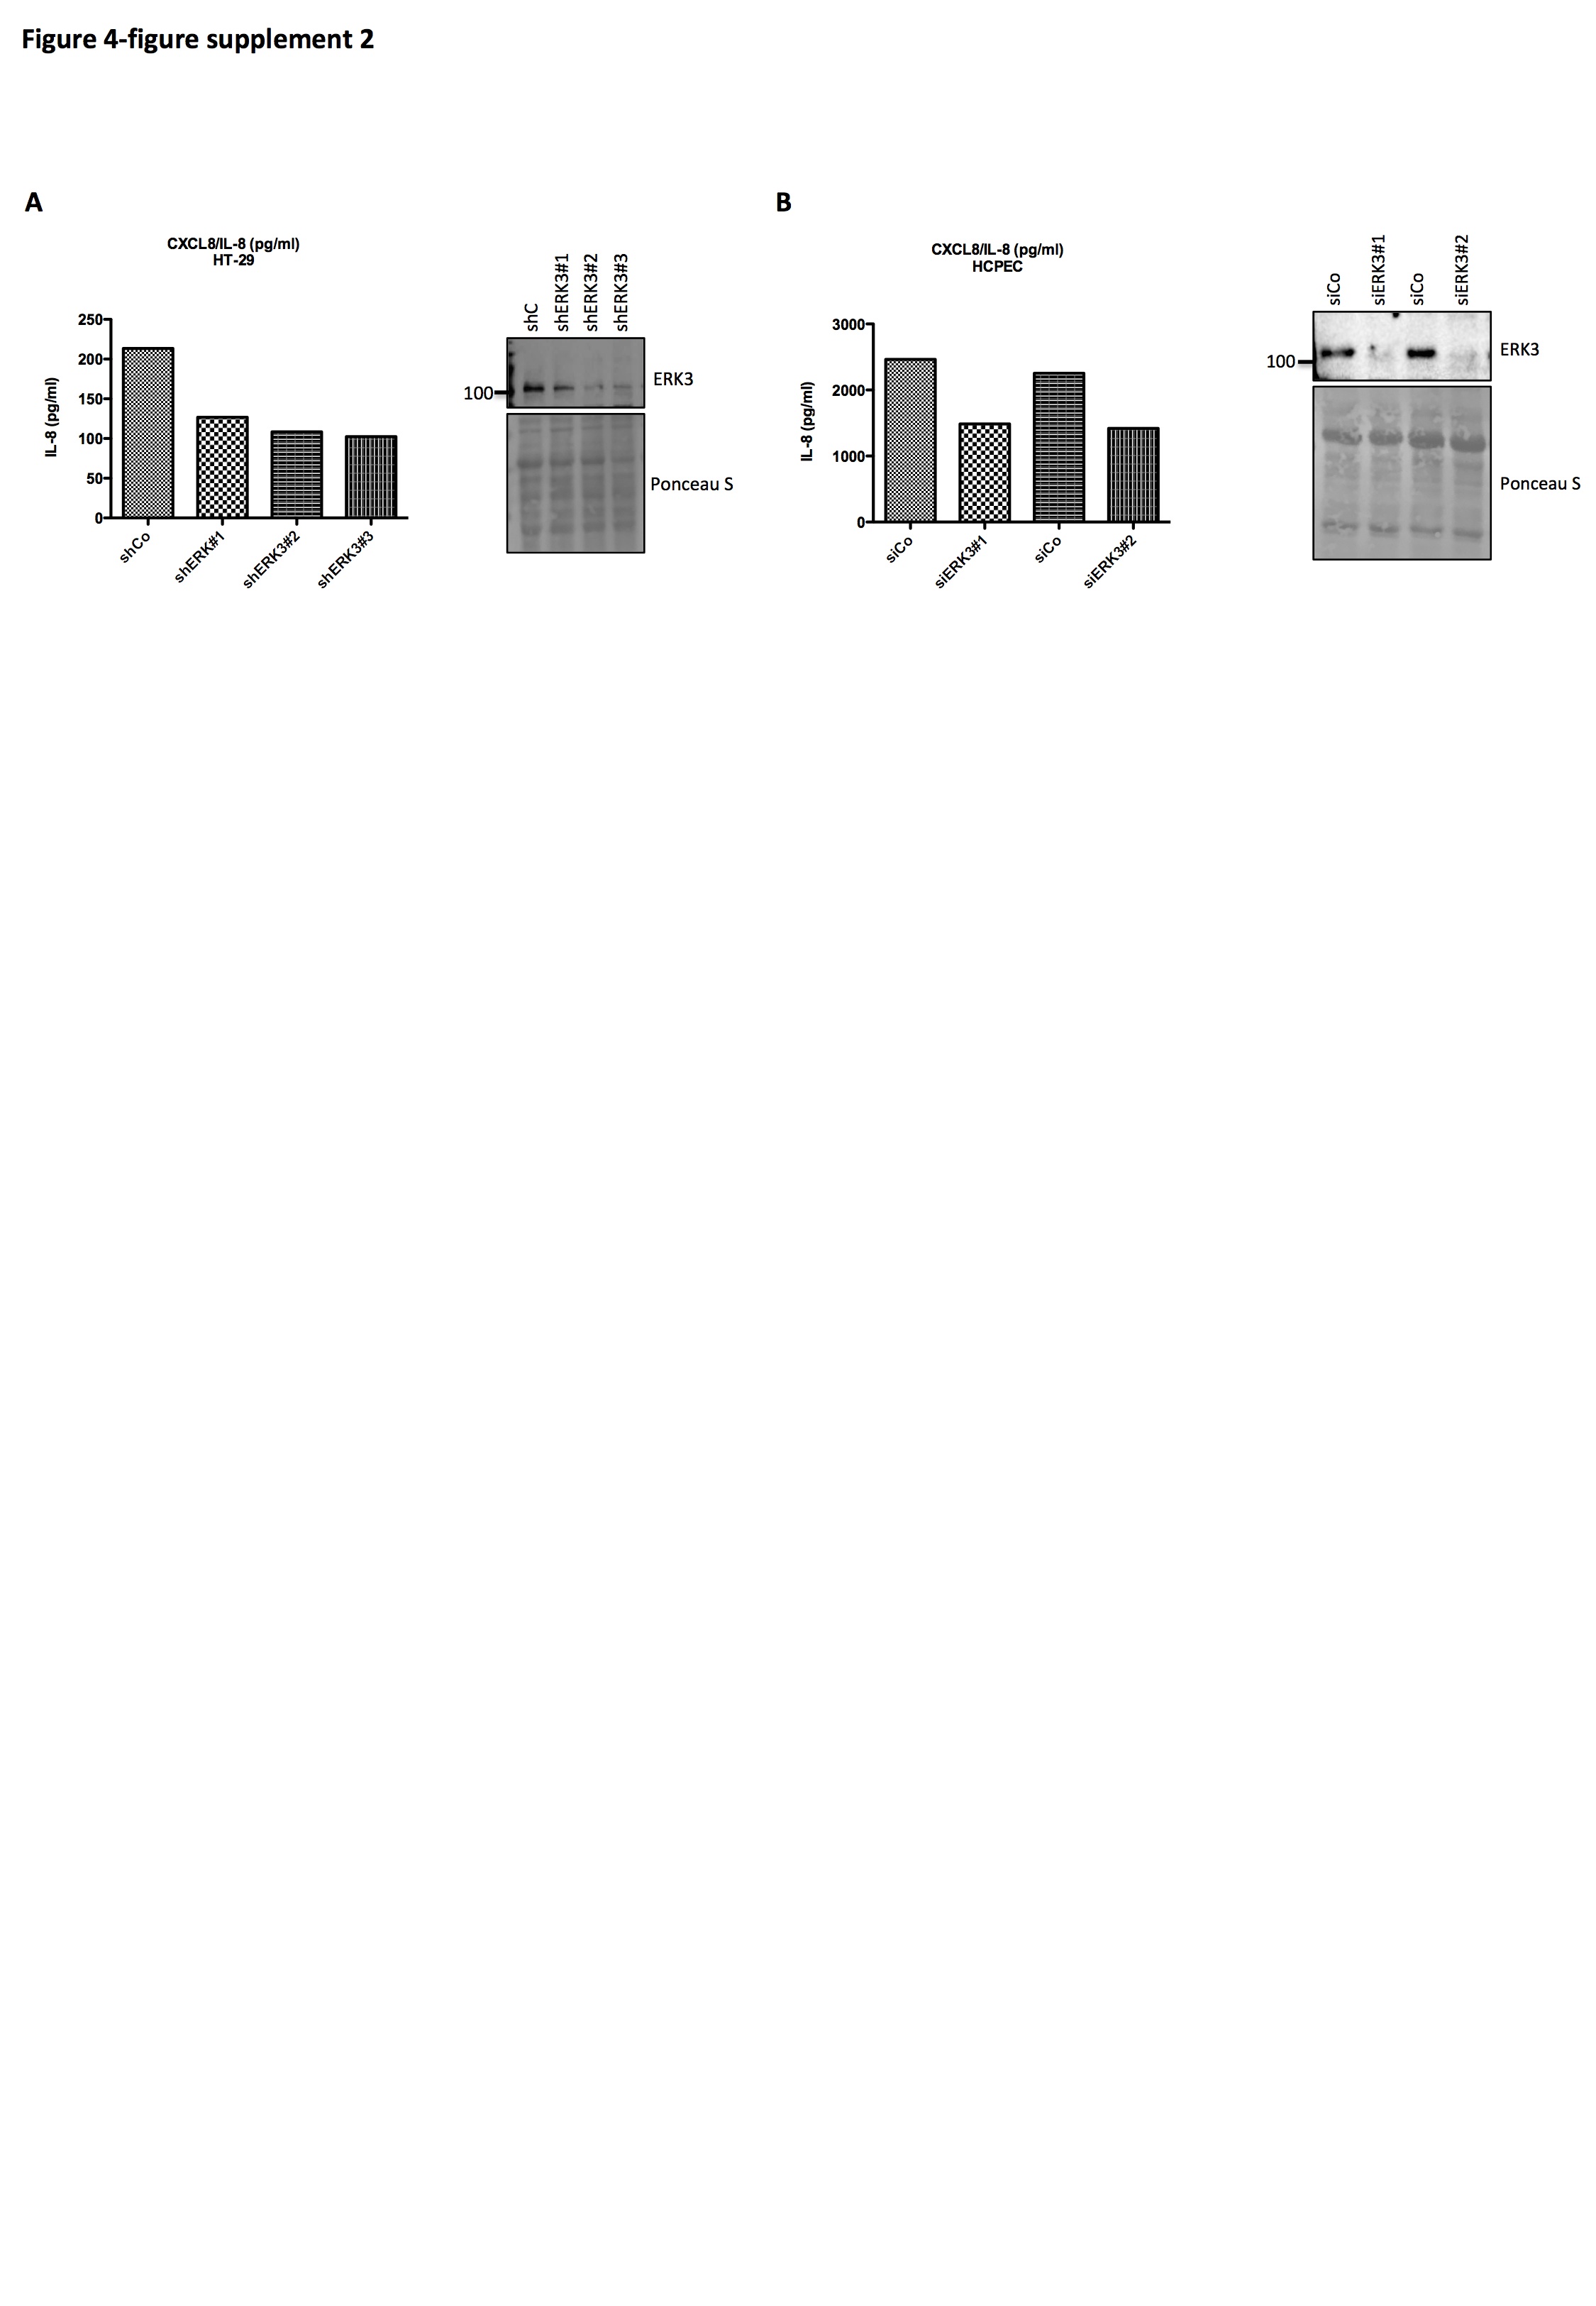

Supplement: supp [file elife-52511-supp-v1.zip › elife_poa_e52511_Figure_4_figure_supplement_2.jpg]

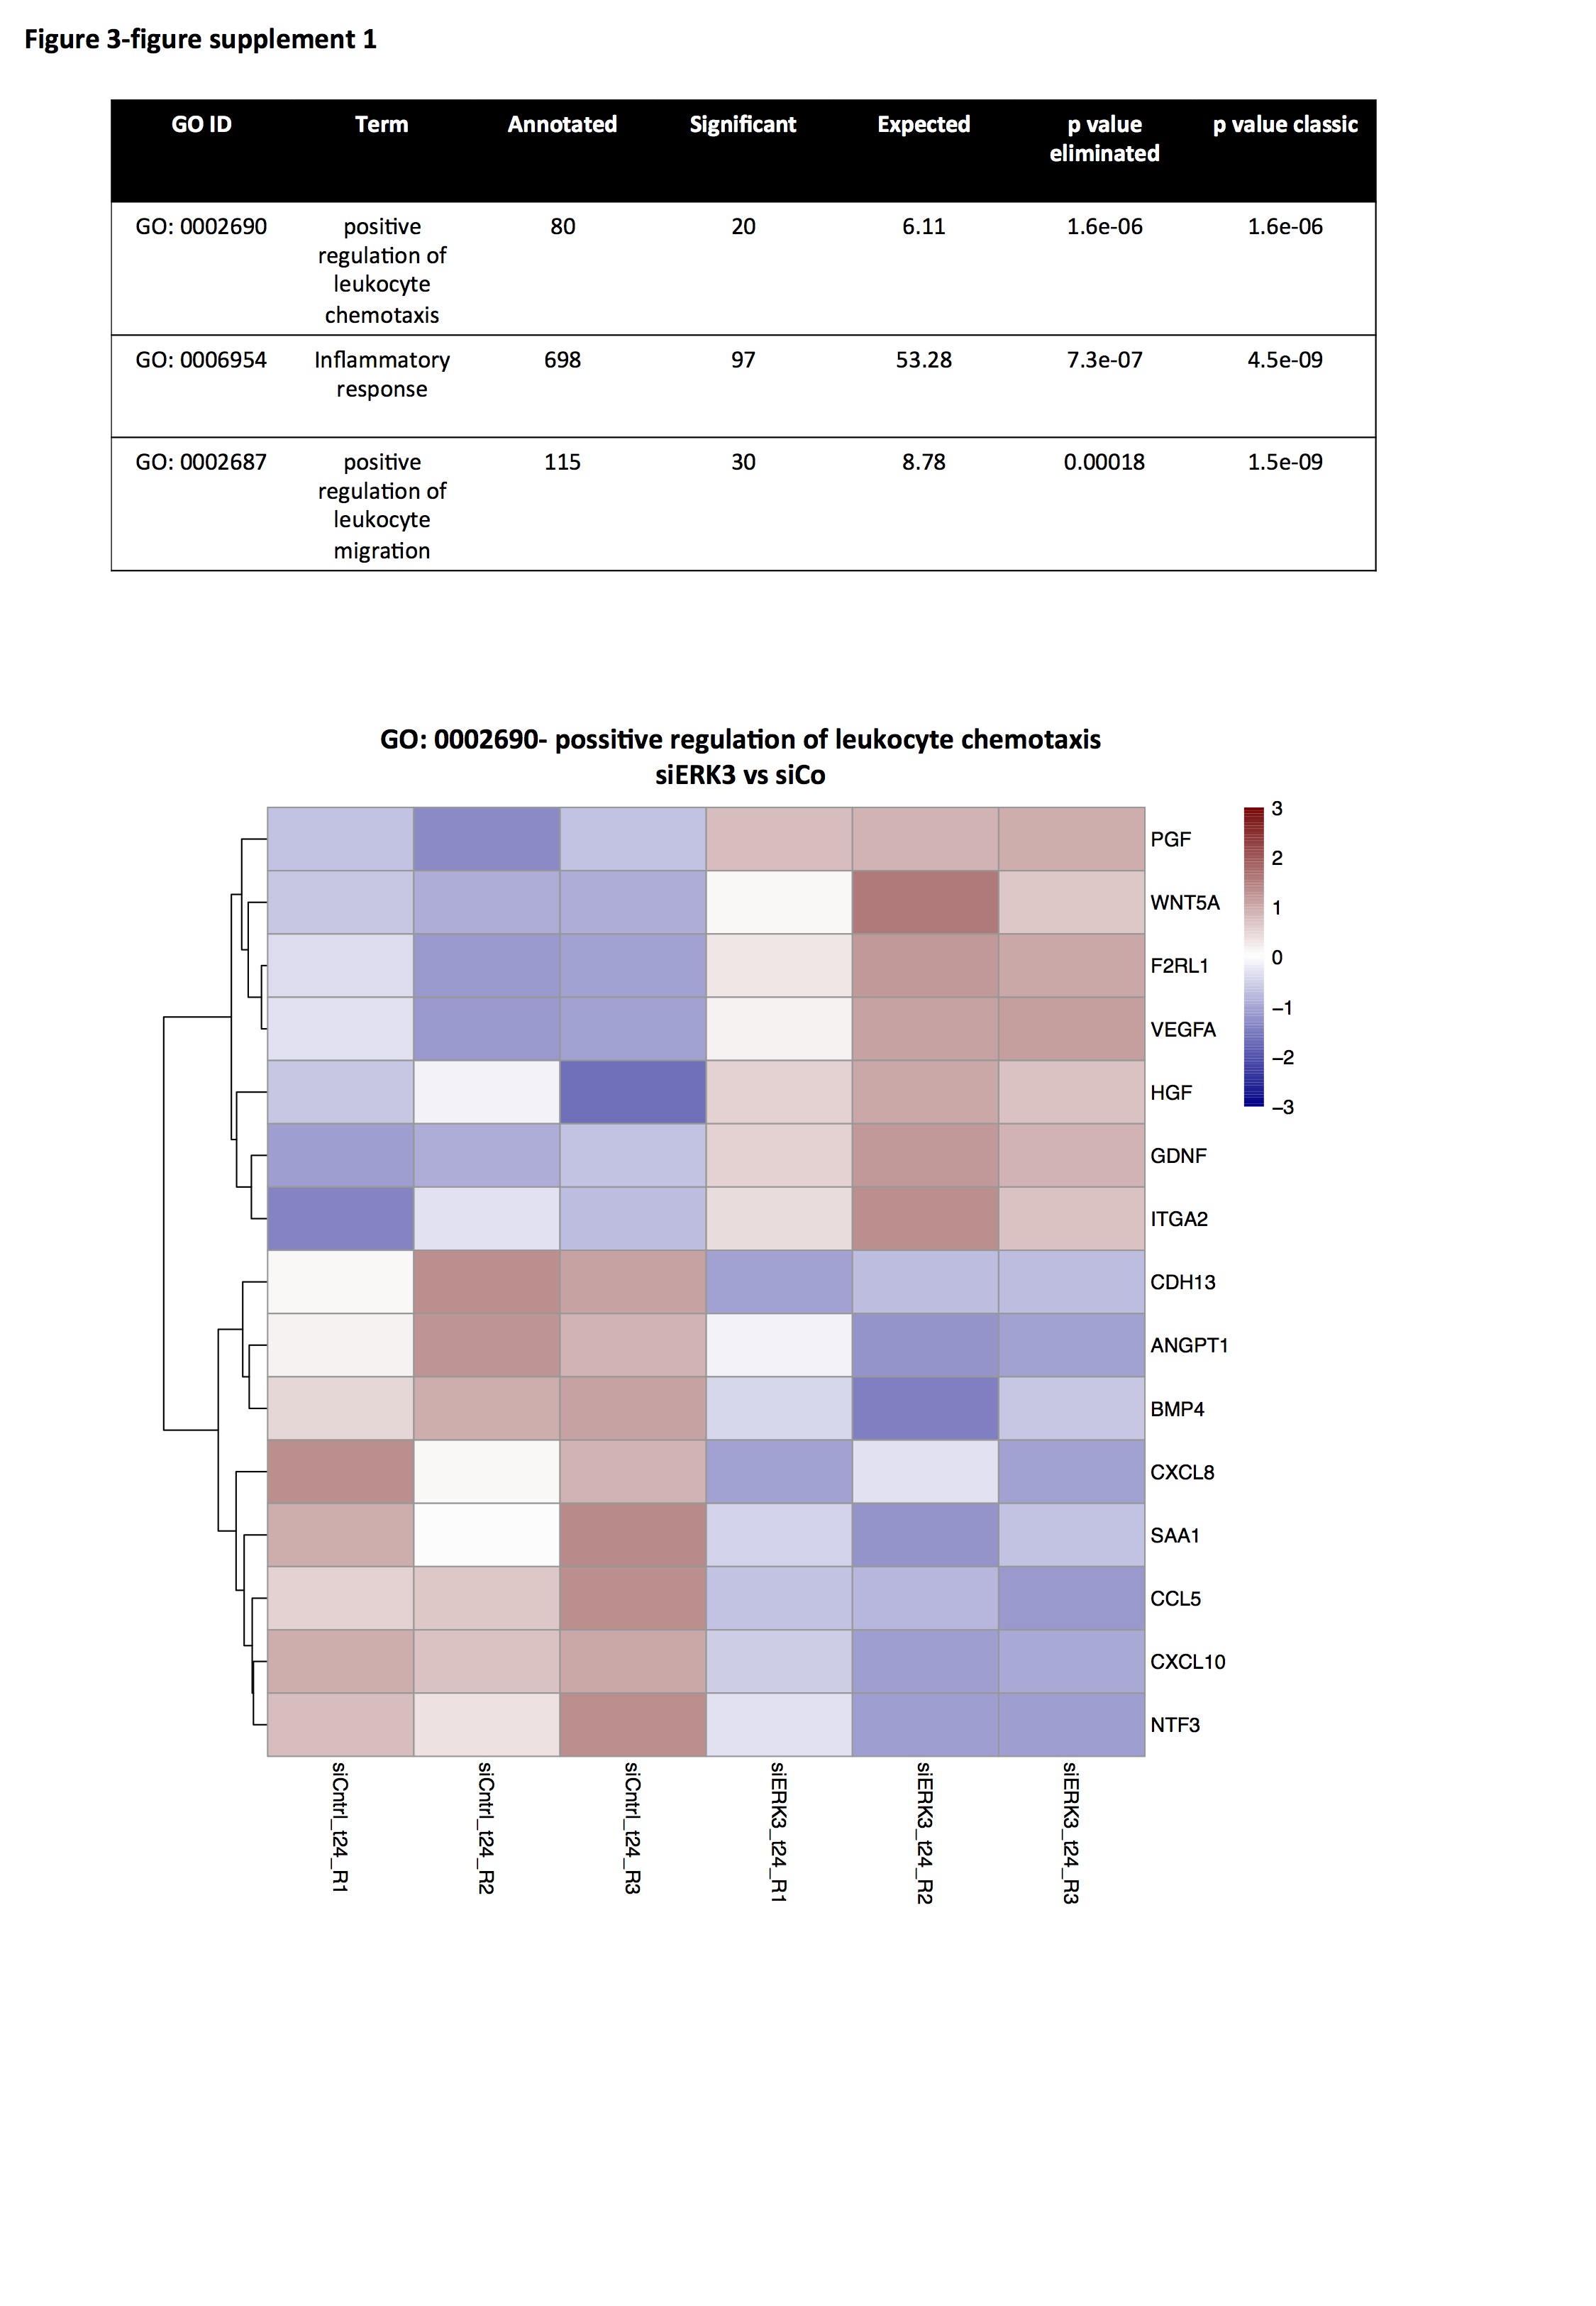

Supplement: supp [file elife-52511-supp-v1.zip › elife_poa_e52511_Figure_3_figure_supplement_1.jpg]

Figure 6-figure supplement 3

**B**

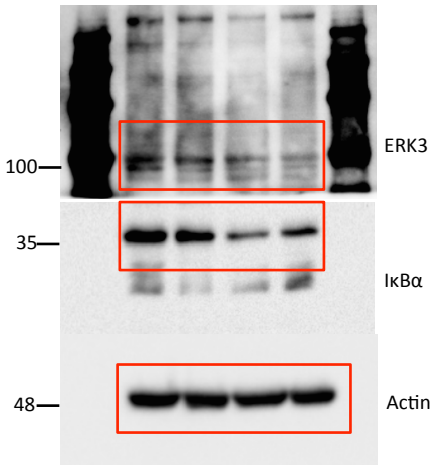

Supplement: supp [file elife-52511-supp-v1.zip › elife_poa_e52511_Figure_6_figure_supplement_3_source_data_1.pdf]

Figure 3

A

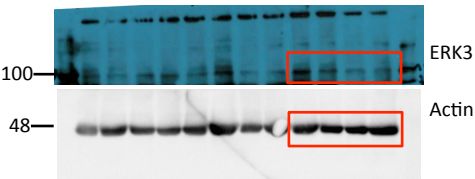

Supplement: supp [file elife-52511-supp-v1.zip › elife_poa_e52511_Figure_3_source_data_4.pdf]

Figure 4-figure supplement 4

A

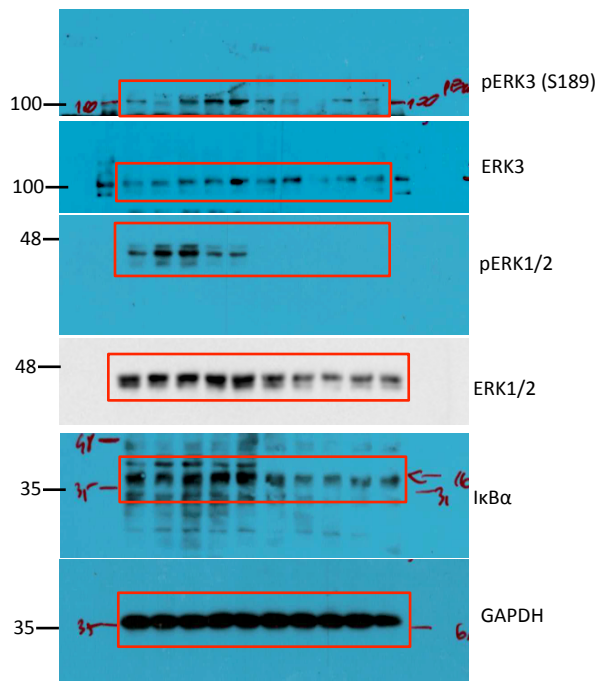

B

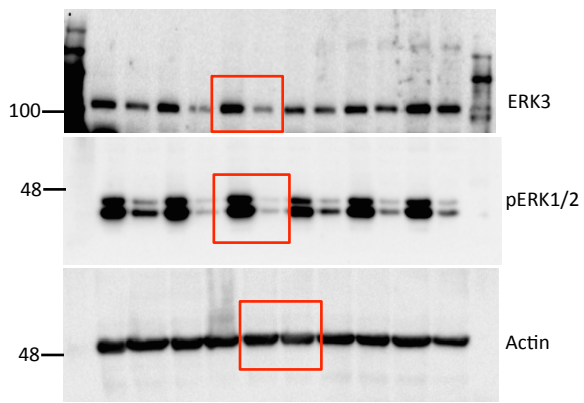

D

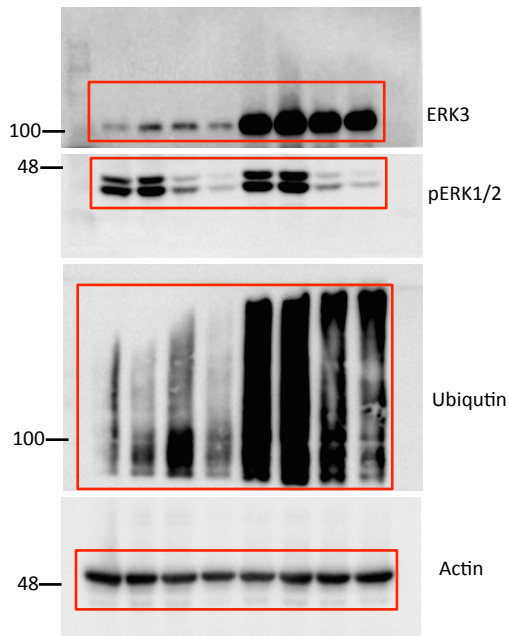

Supplement: supp [file elife-52511-supp-v1.zip › elife_poa_e52511_Figure_4_figure_supplement_4_source_data_1.pdf]

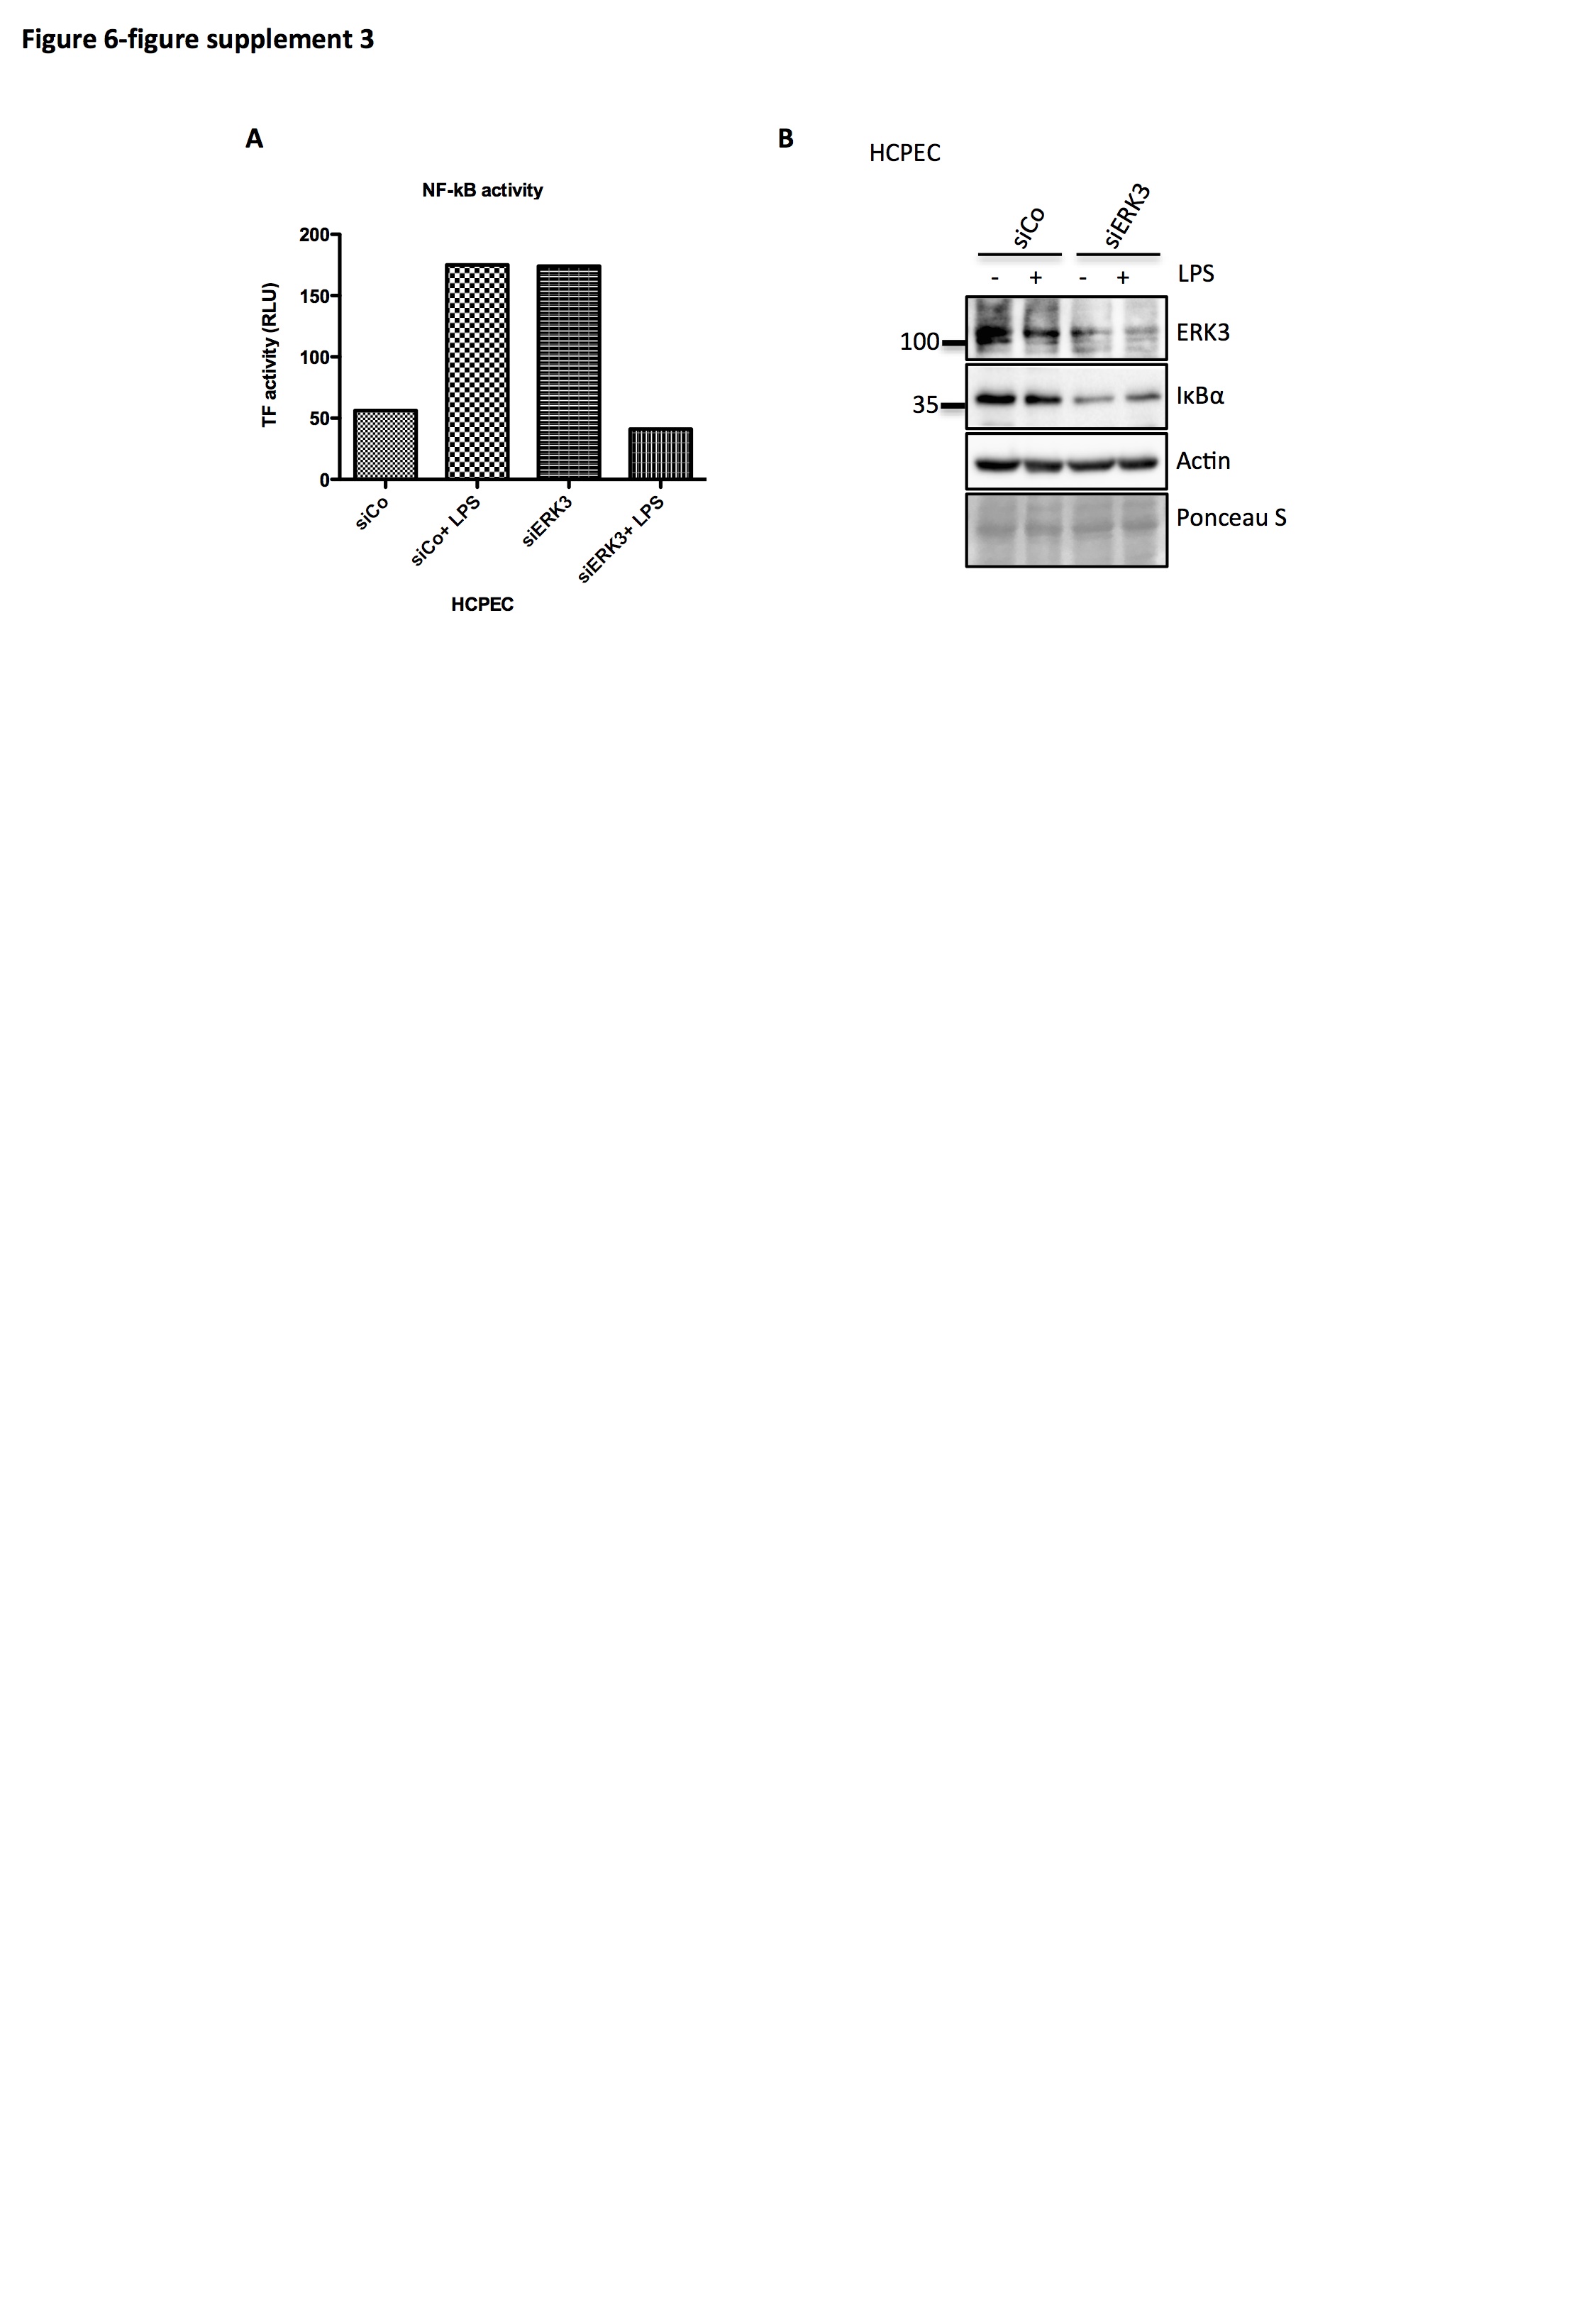

Supplement: supp [file elife-52511-supp-v1.zip › elife_poa_e52511_Figure_6_figure_supplement_3.jpg]

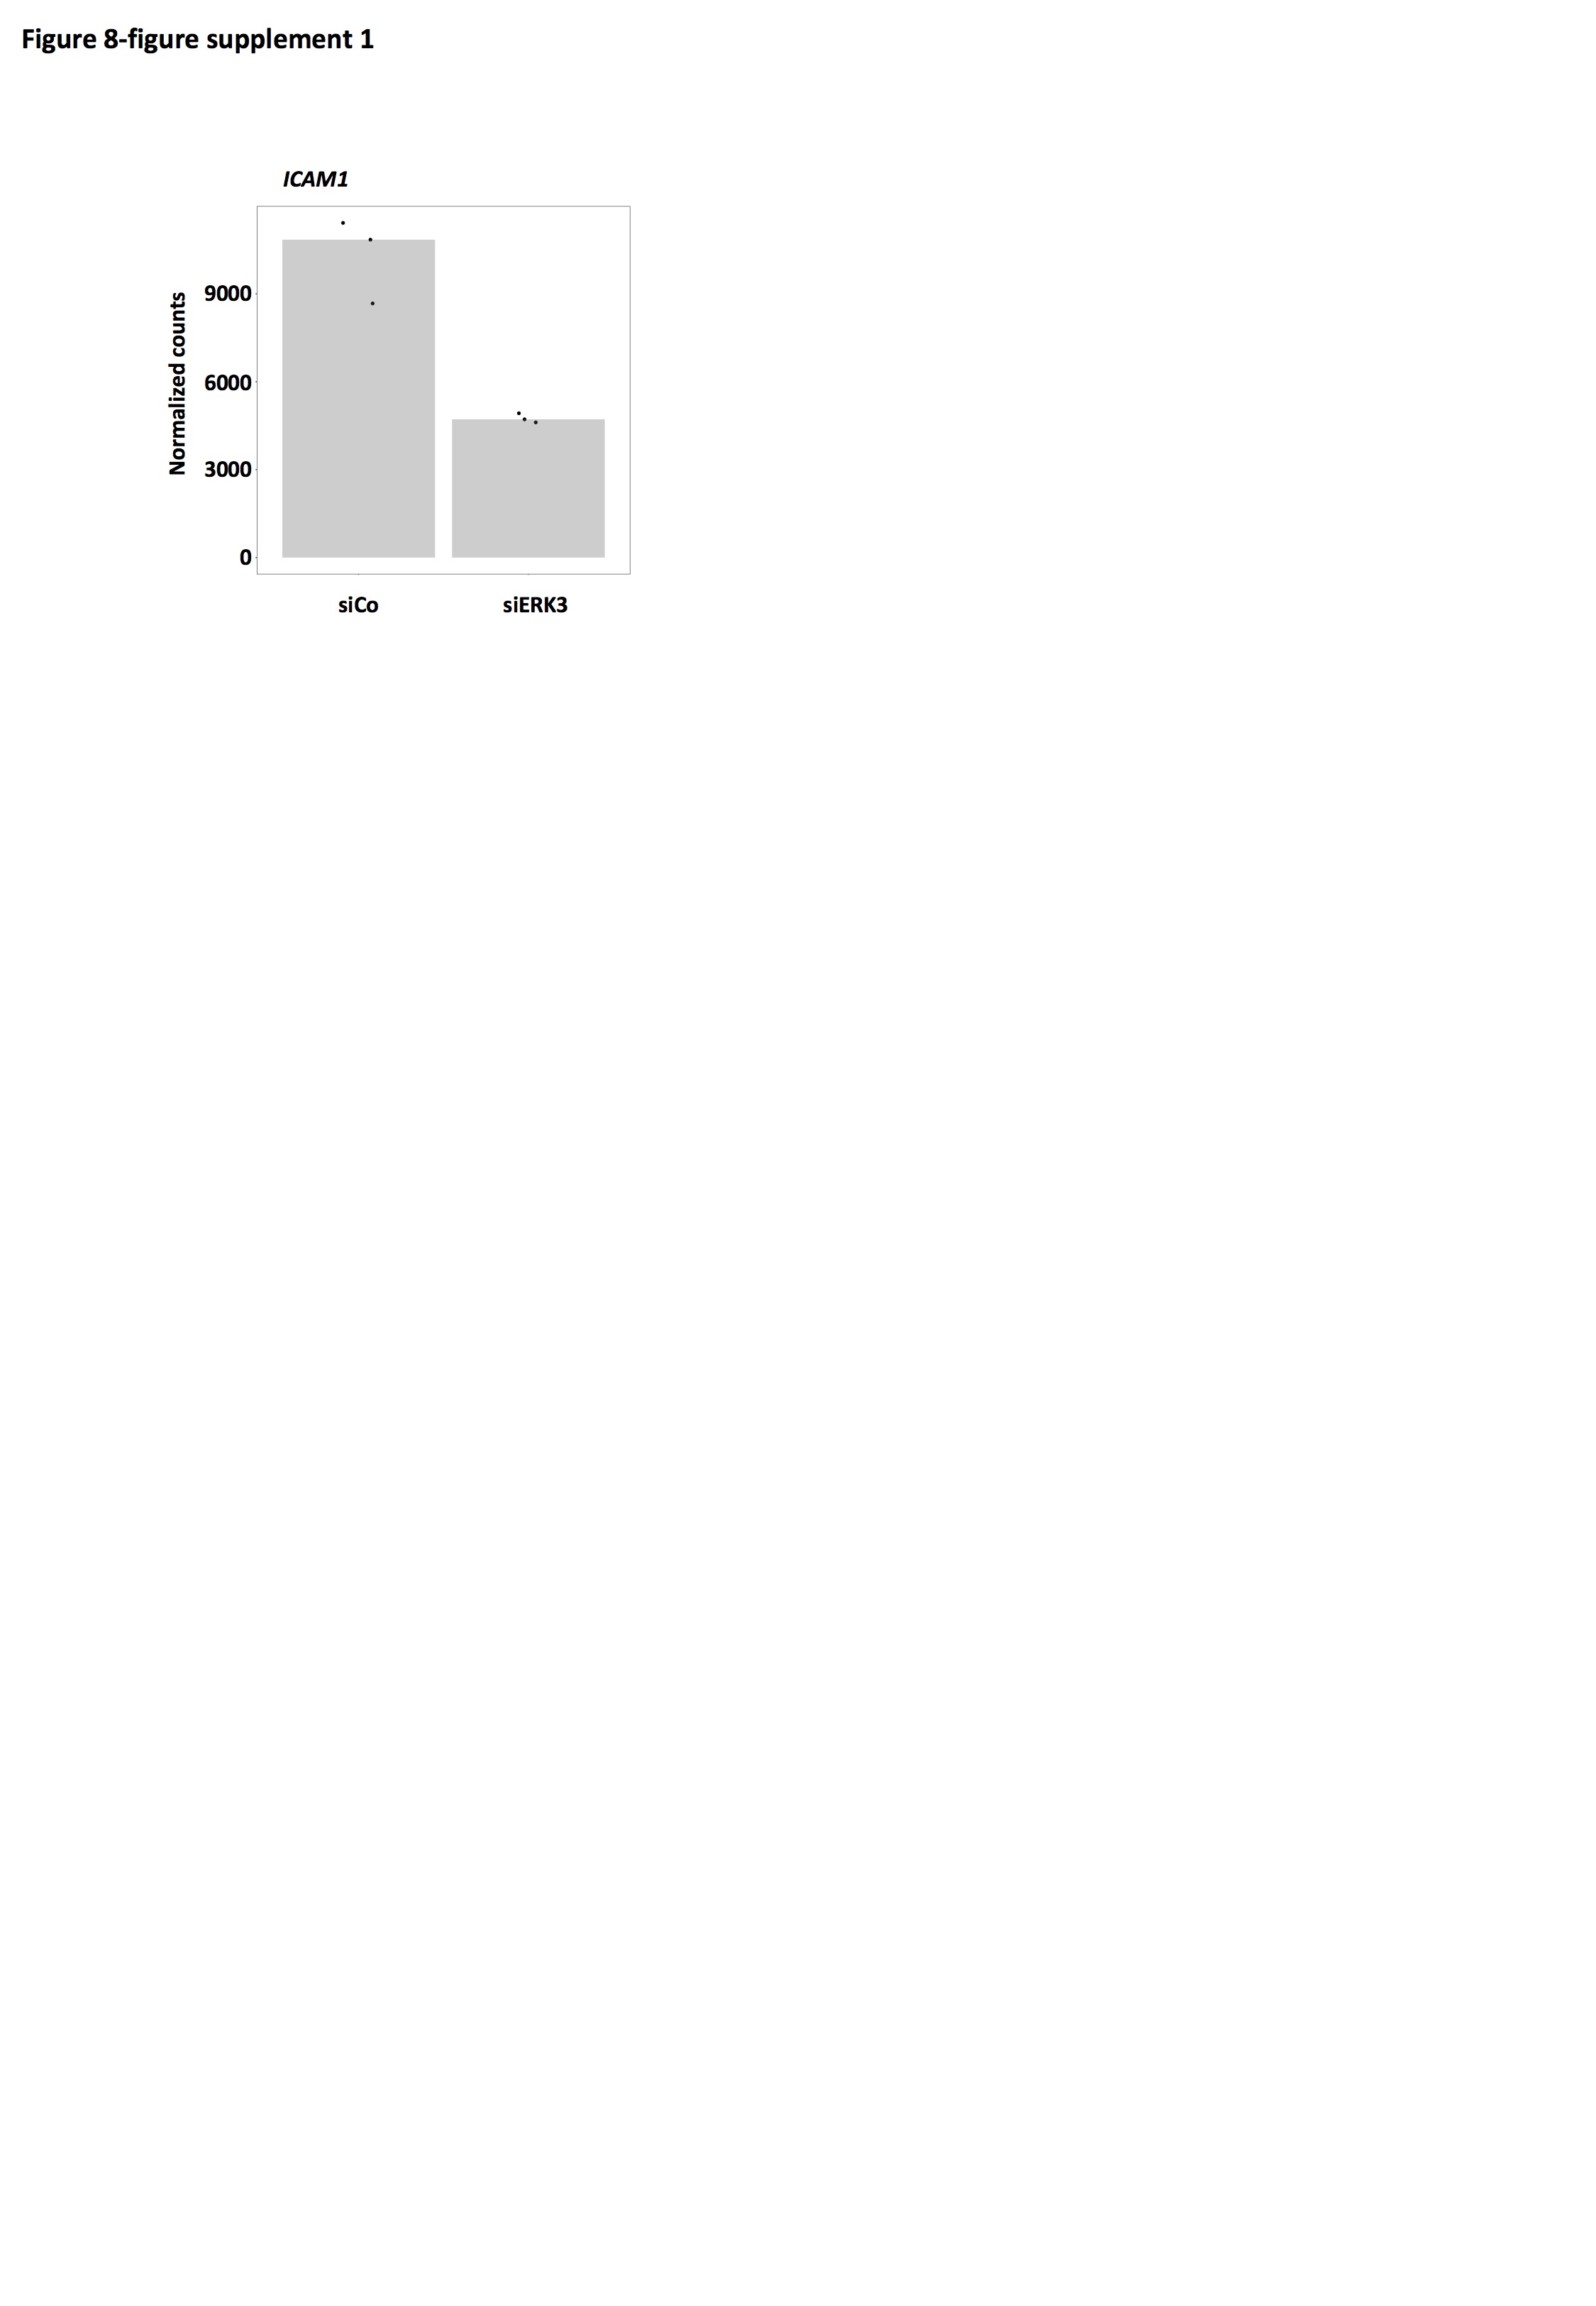

Supplement: supp [file elife-52511-supp-v1.zip › elife_poa_e52511_Figure_8_figure_supplement_1.jpg]

Figure 5

A

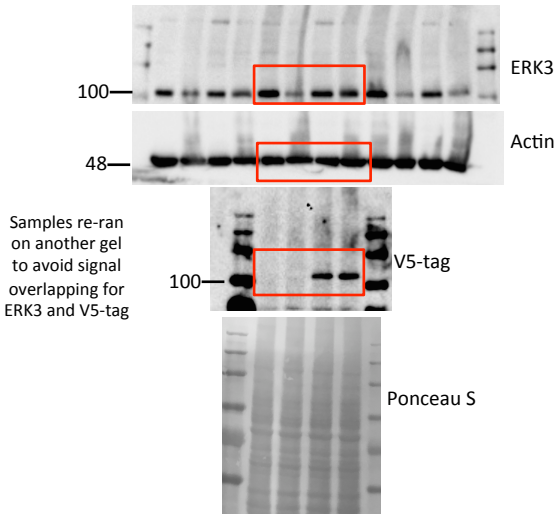

B

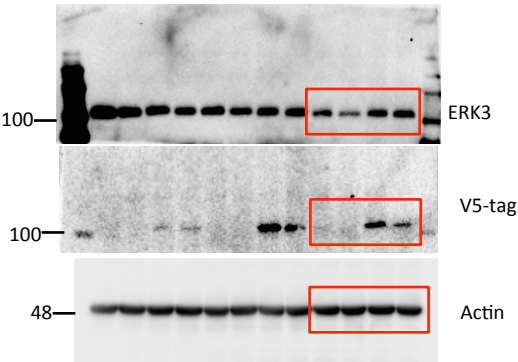

C

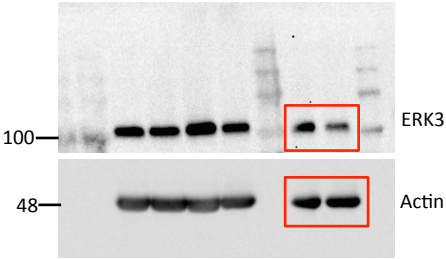

Supplement: supp [file elife-52511-supp-v1.zip › elife_poa_e52511_Figure_5_source_data_1.pdf]

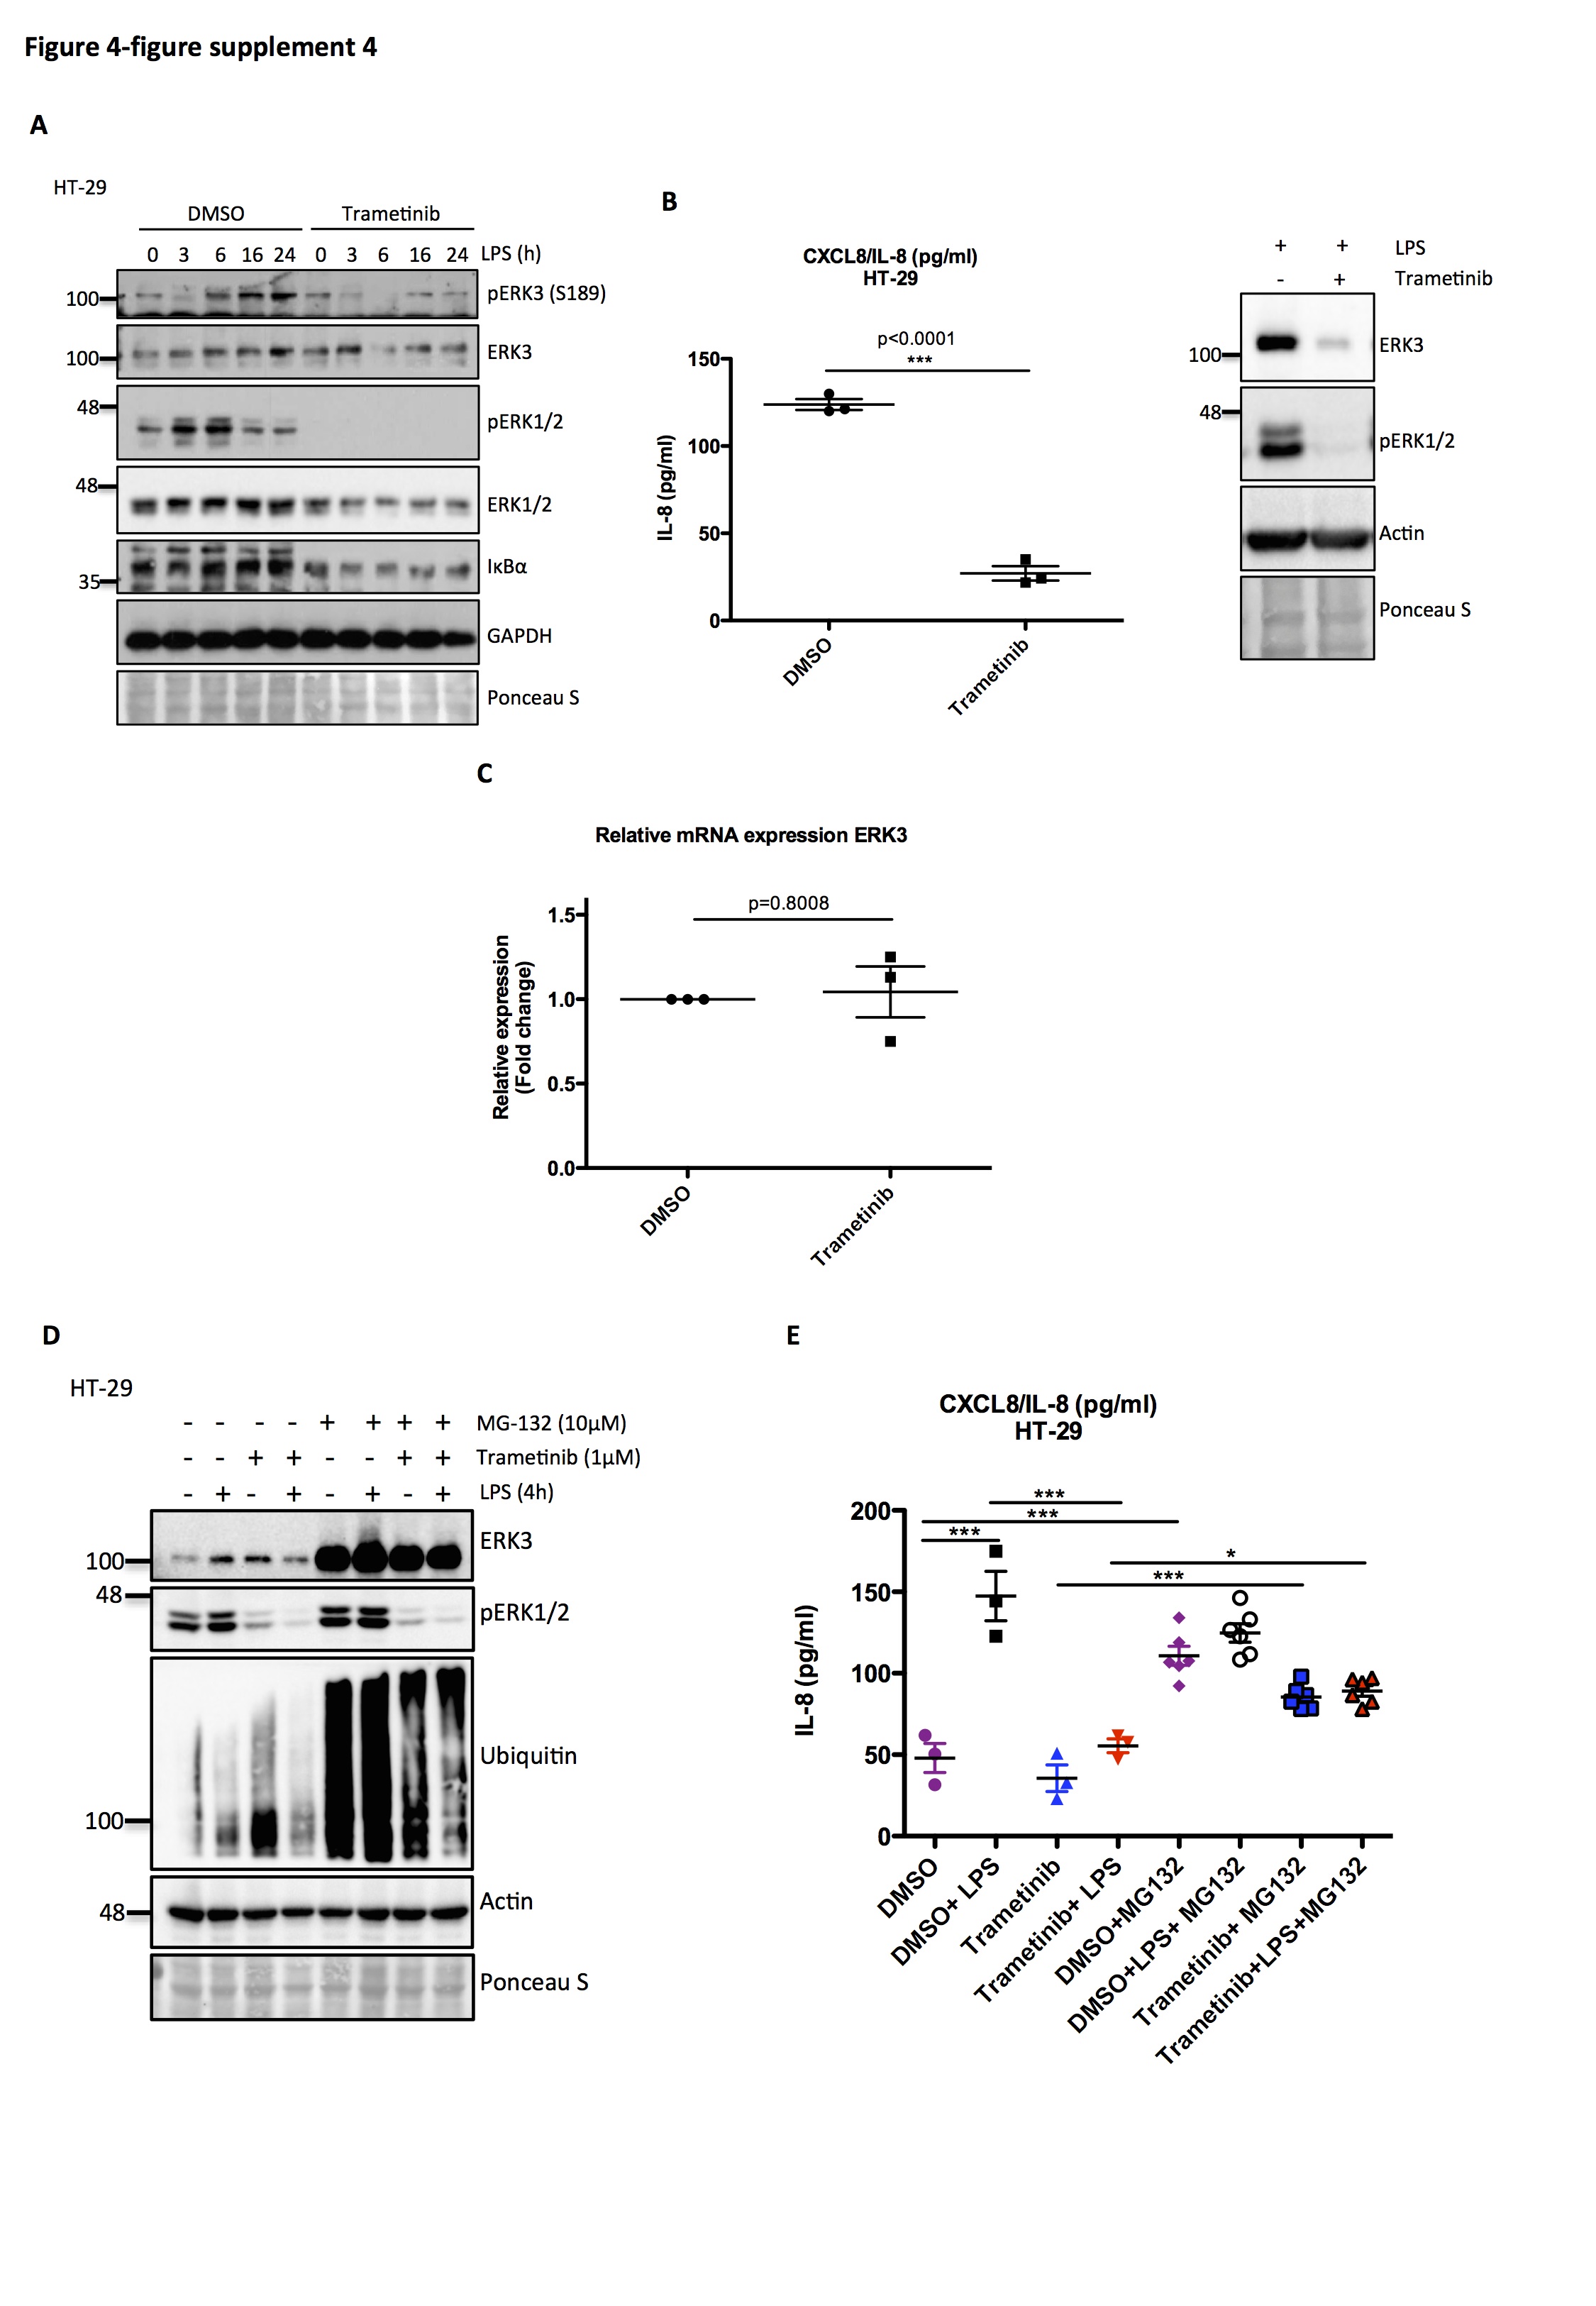

Supplement: supp [file elife-52511-supp-v1.zip › elife_poa_e52511_Figure_4_figure_supplement_4.jpg]

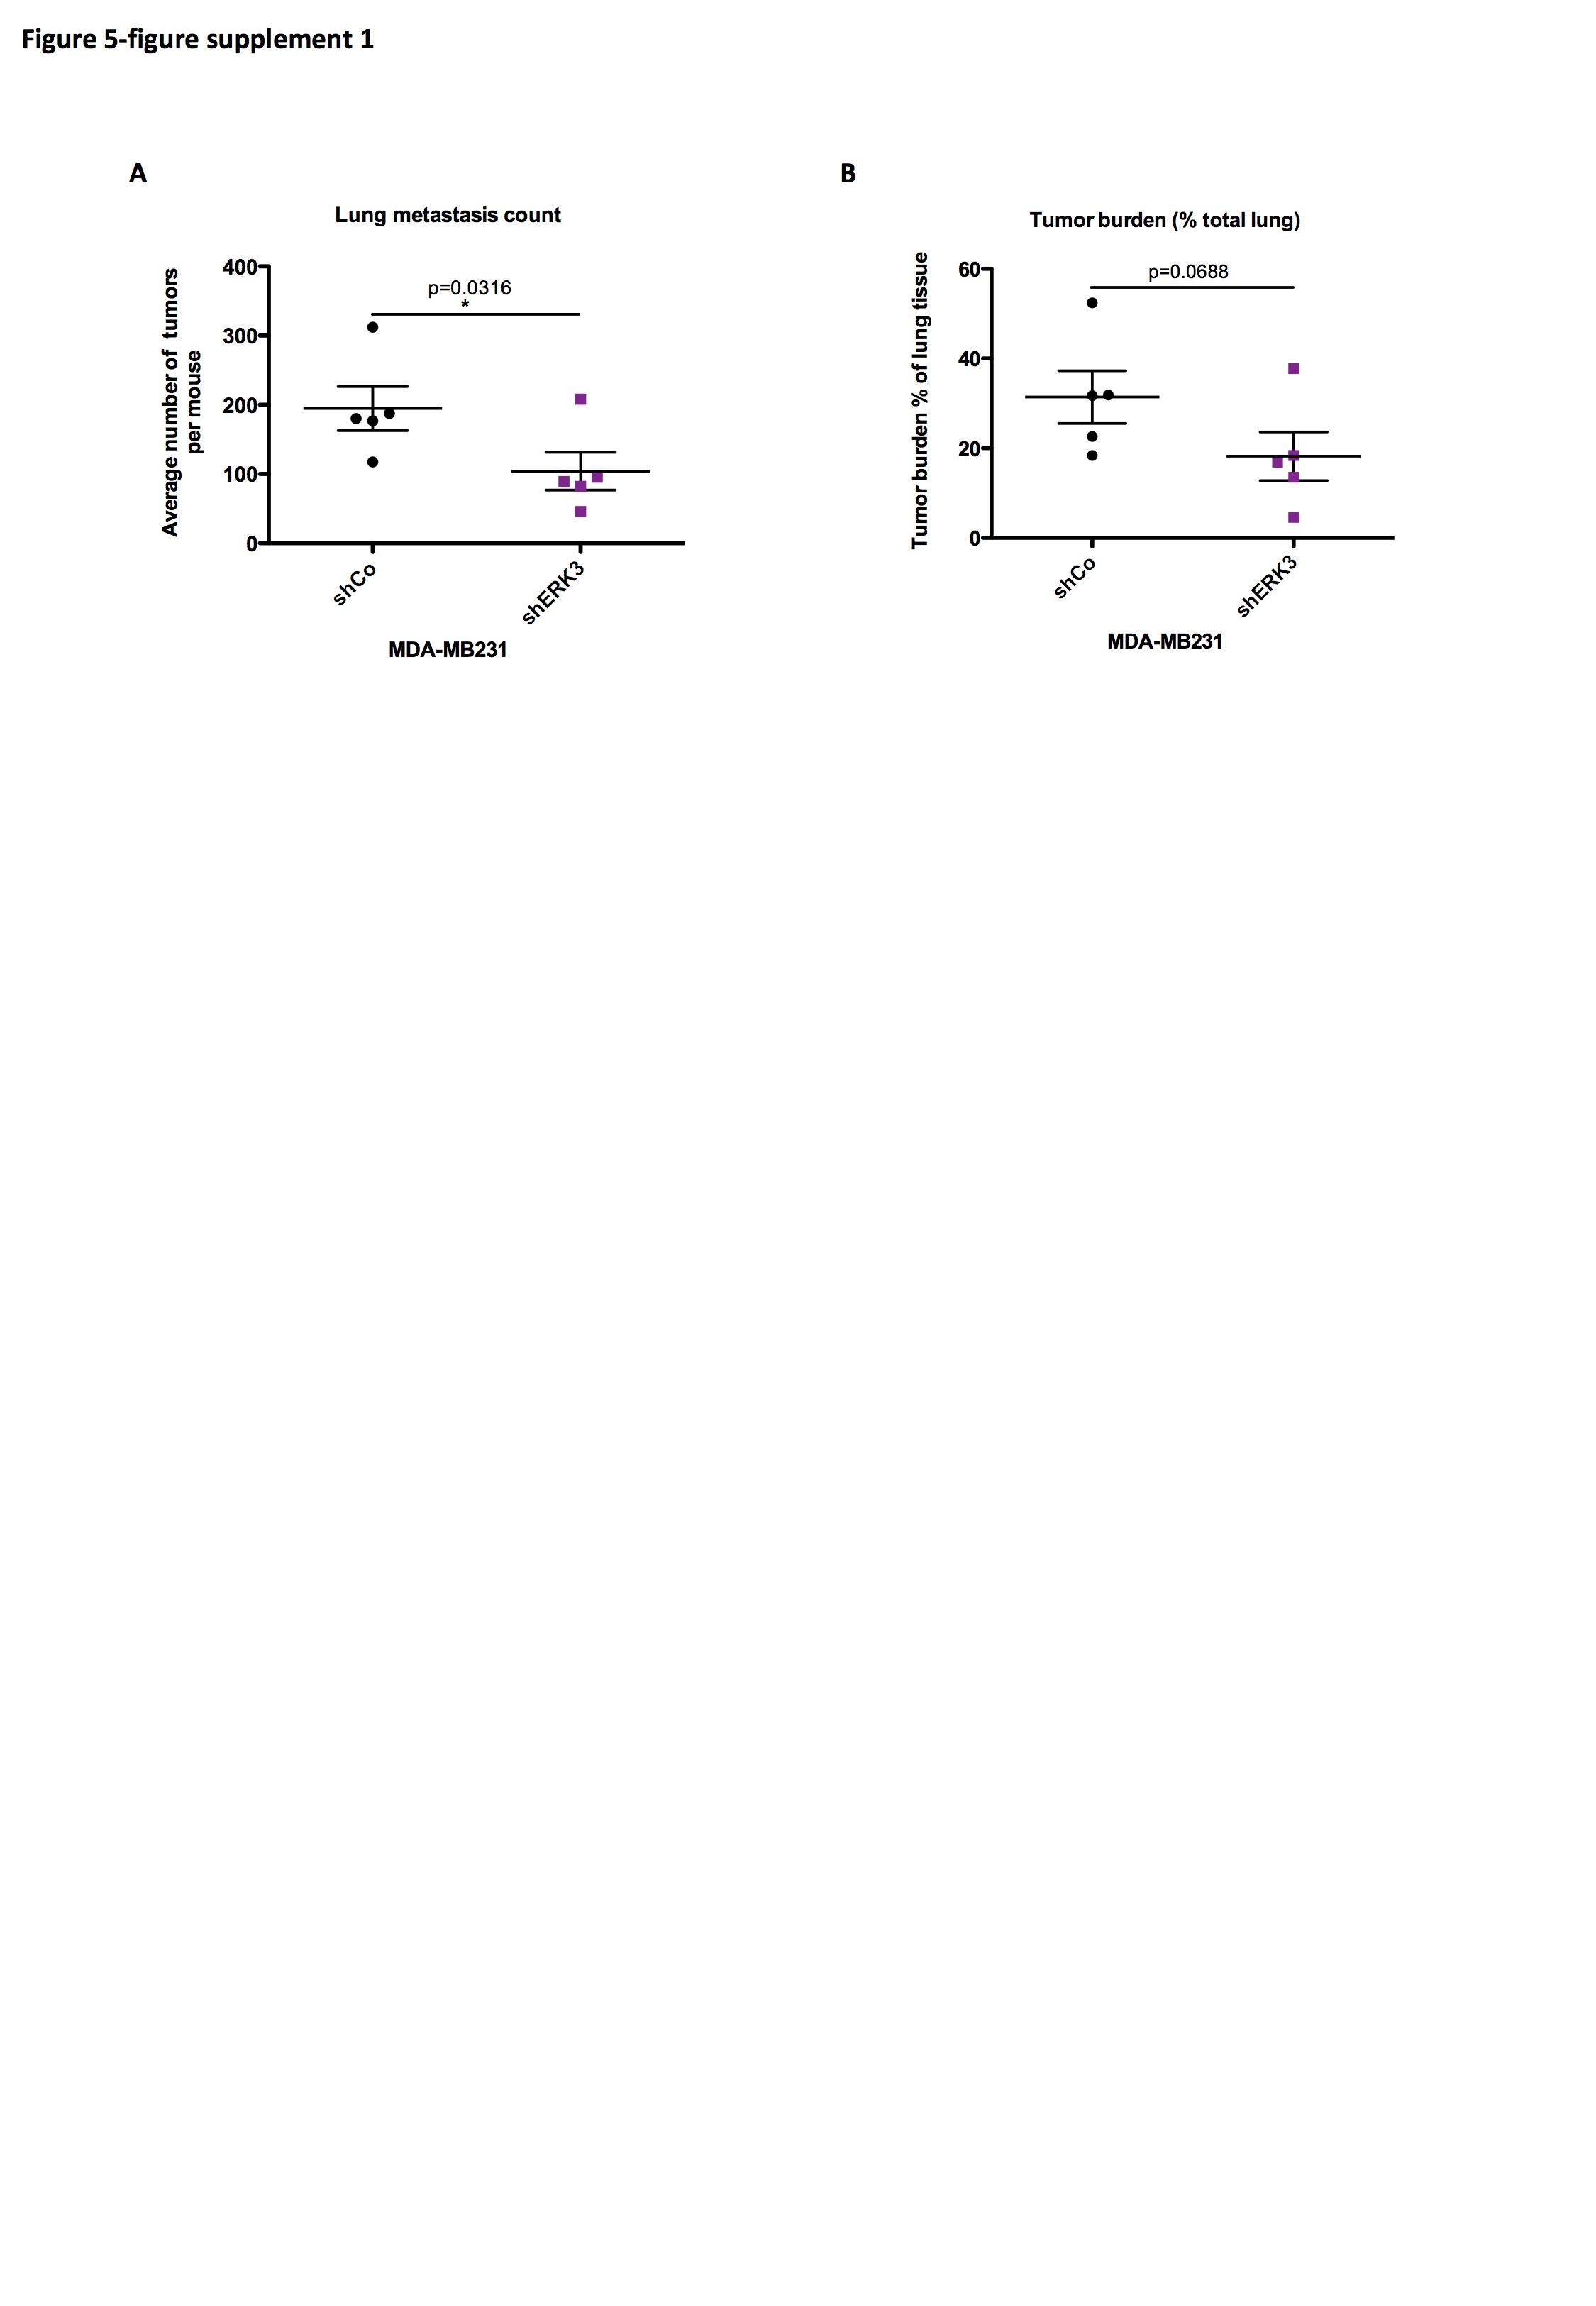

Supplement: supp [file elife-52511-supp-v1.zip › elife_poa_e52511_Figure_5_figure_supplement_1.jpg]

Figure 4-figure supplement 5

A

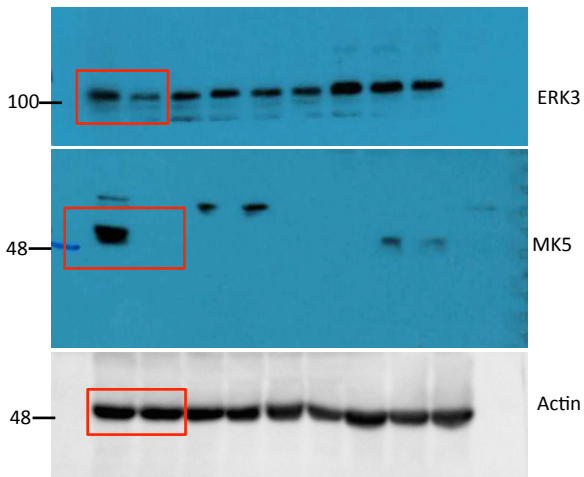

C

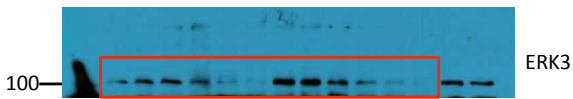

Supplement: supp [file elife-52511-supp-v1.zip › elife_poa_e52511_Figure_4_figure_supplement_5_source_data_1.pdf]

Figure 4-figure supplement 2

A

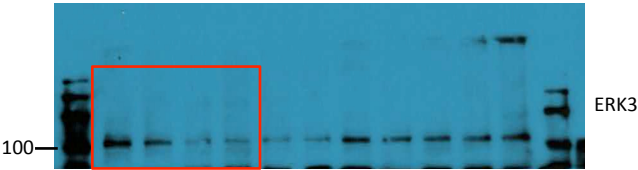

B

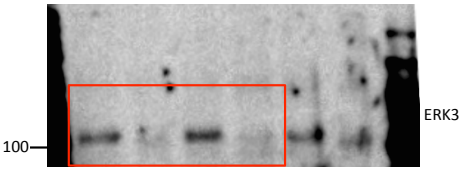

Supplement: supp [file elife-52511-supp-v1.zip › elife_poa_e52511_Figure_4_figure_supplement_2_source_data_1.pdf]

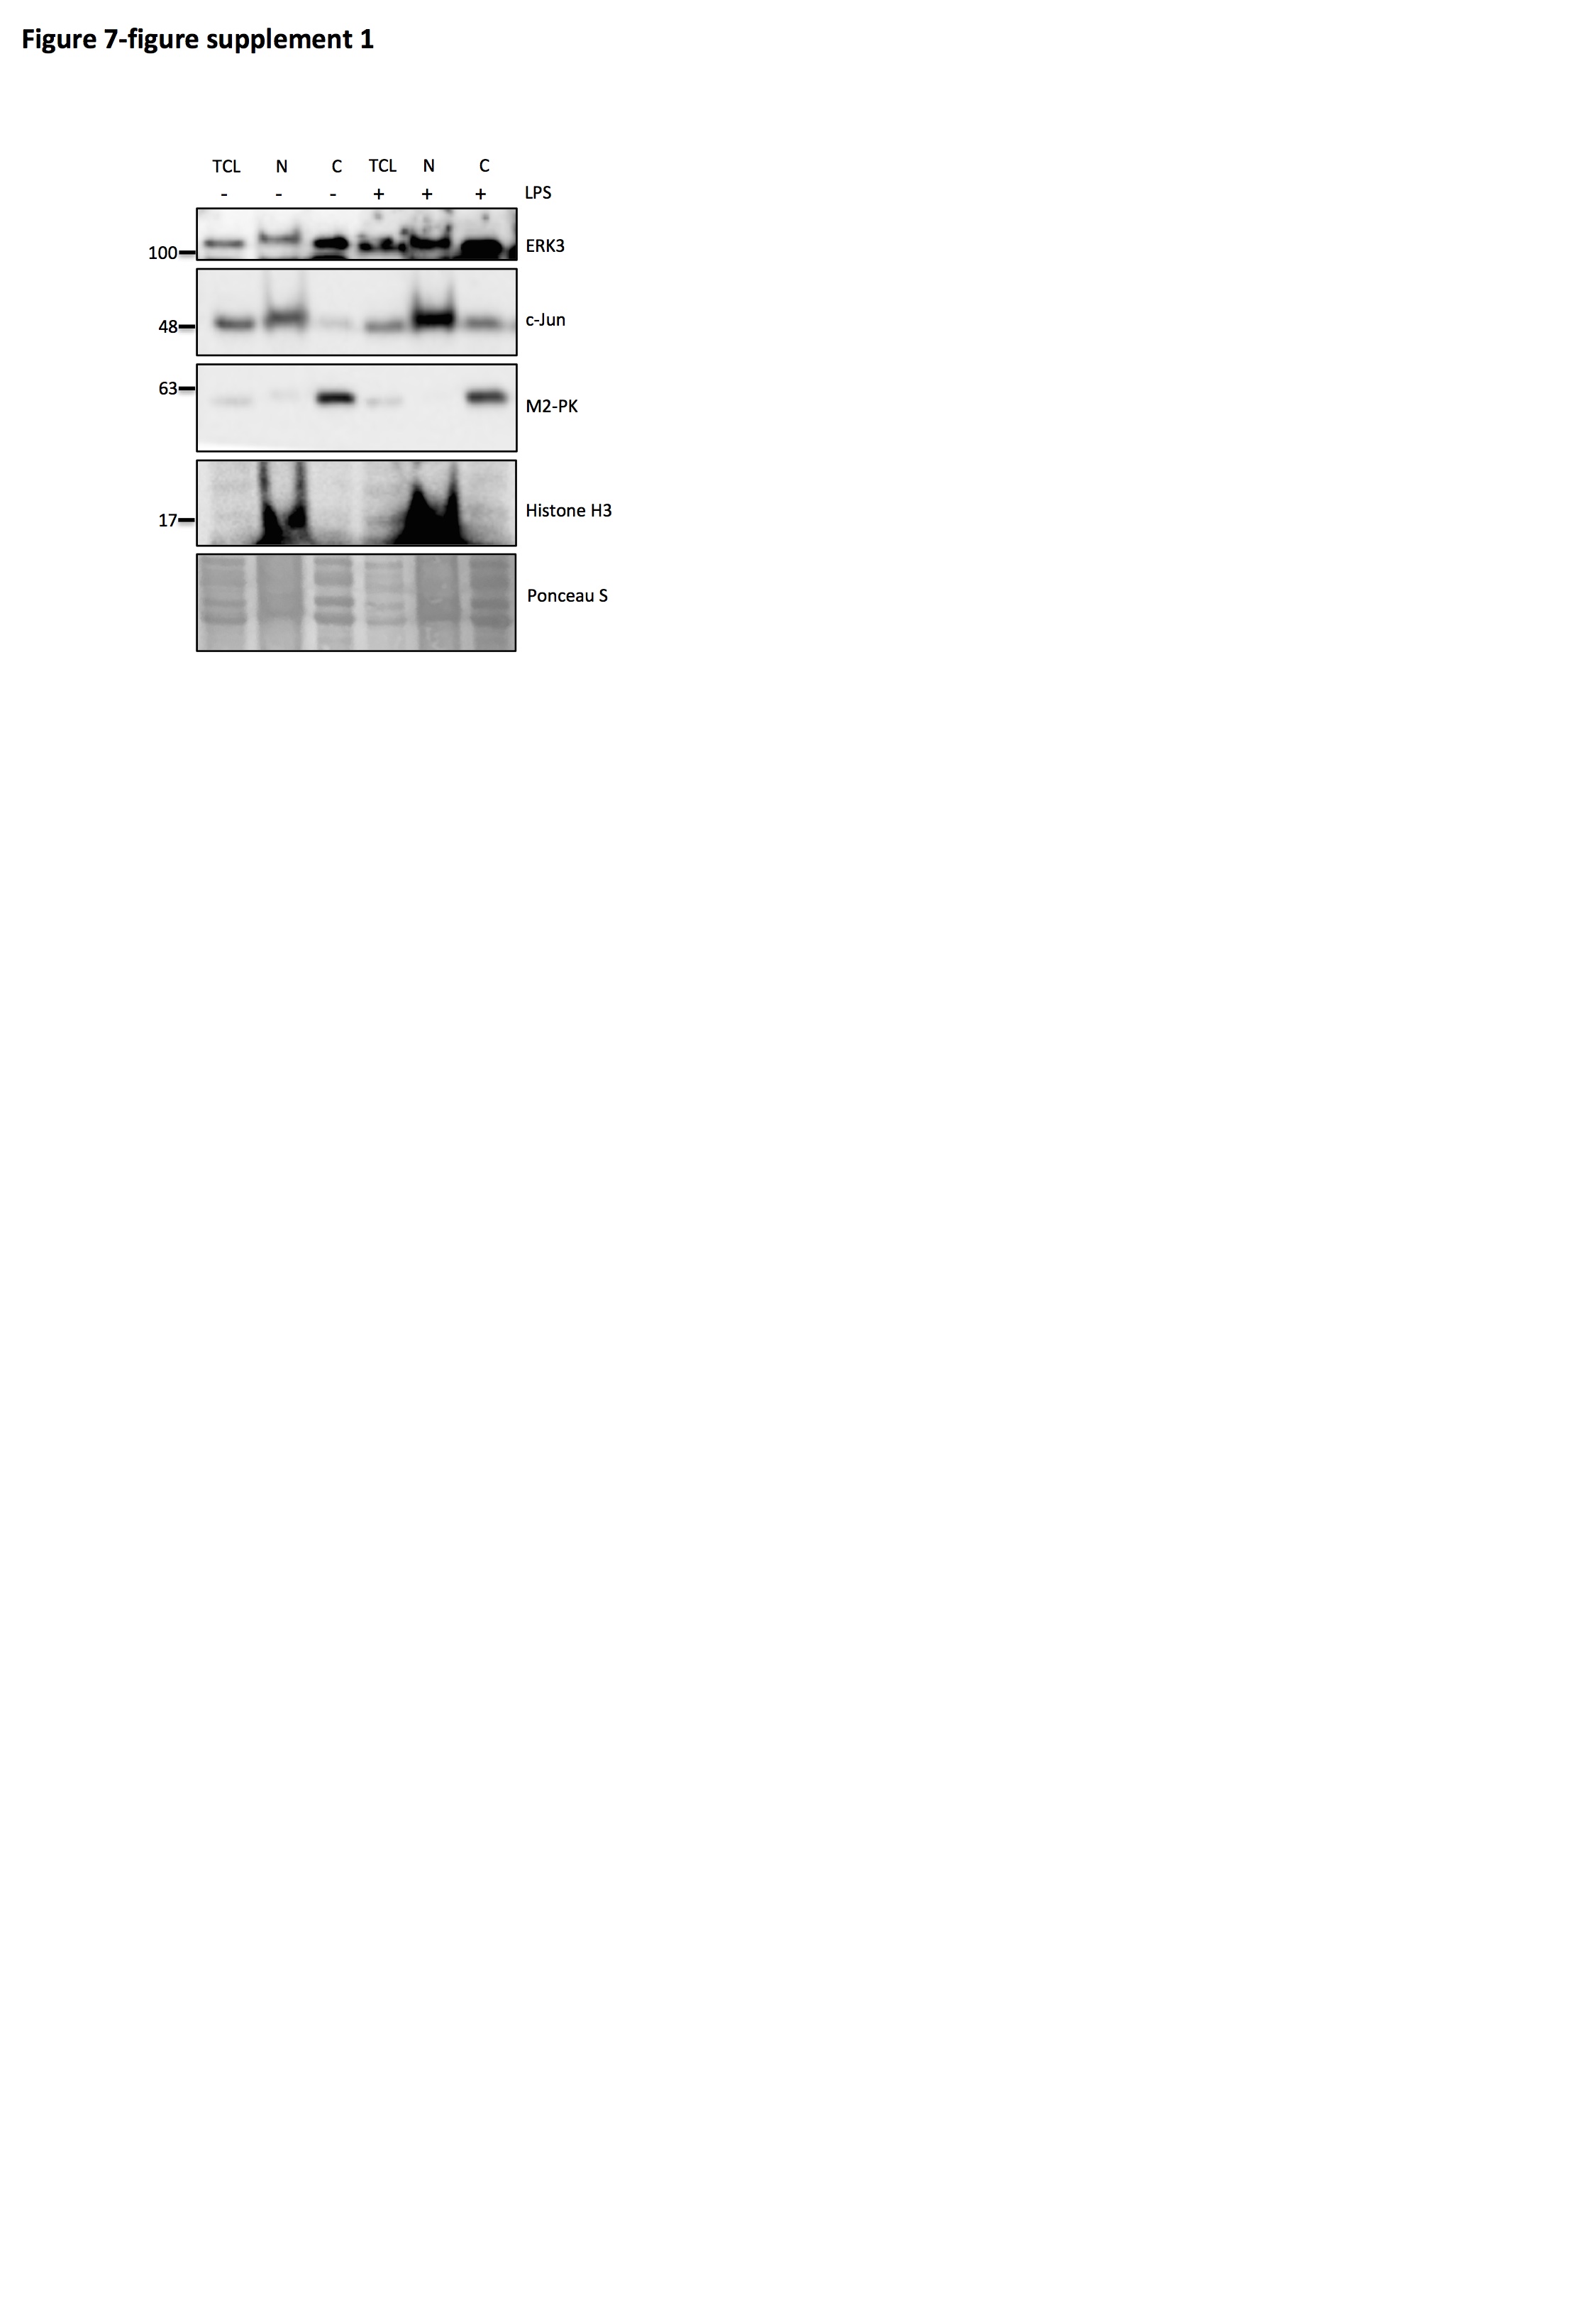

Supplement: supp [file elife-52511-supp-v1.zip › elife_poa_e52511_Figure_7_figure_supplement_1.jpg]

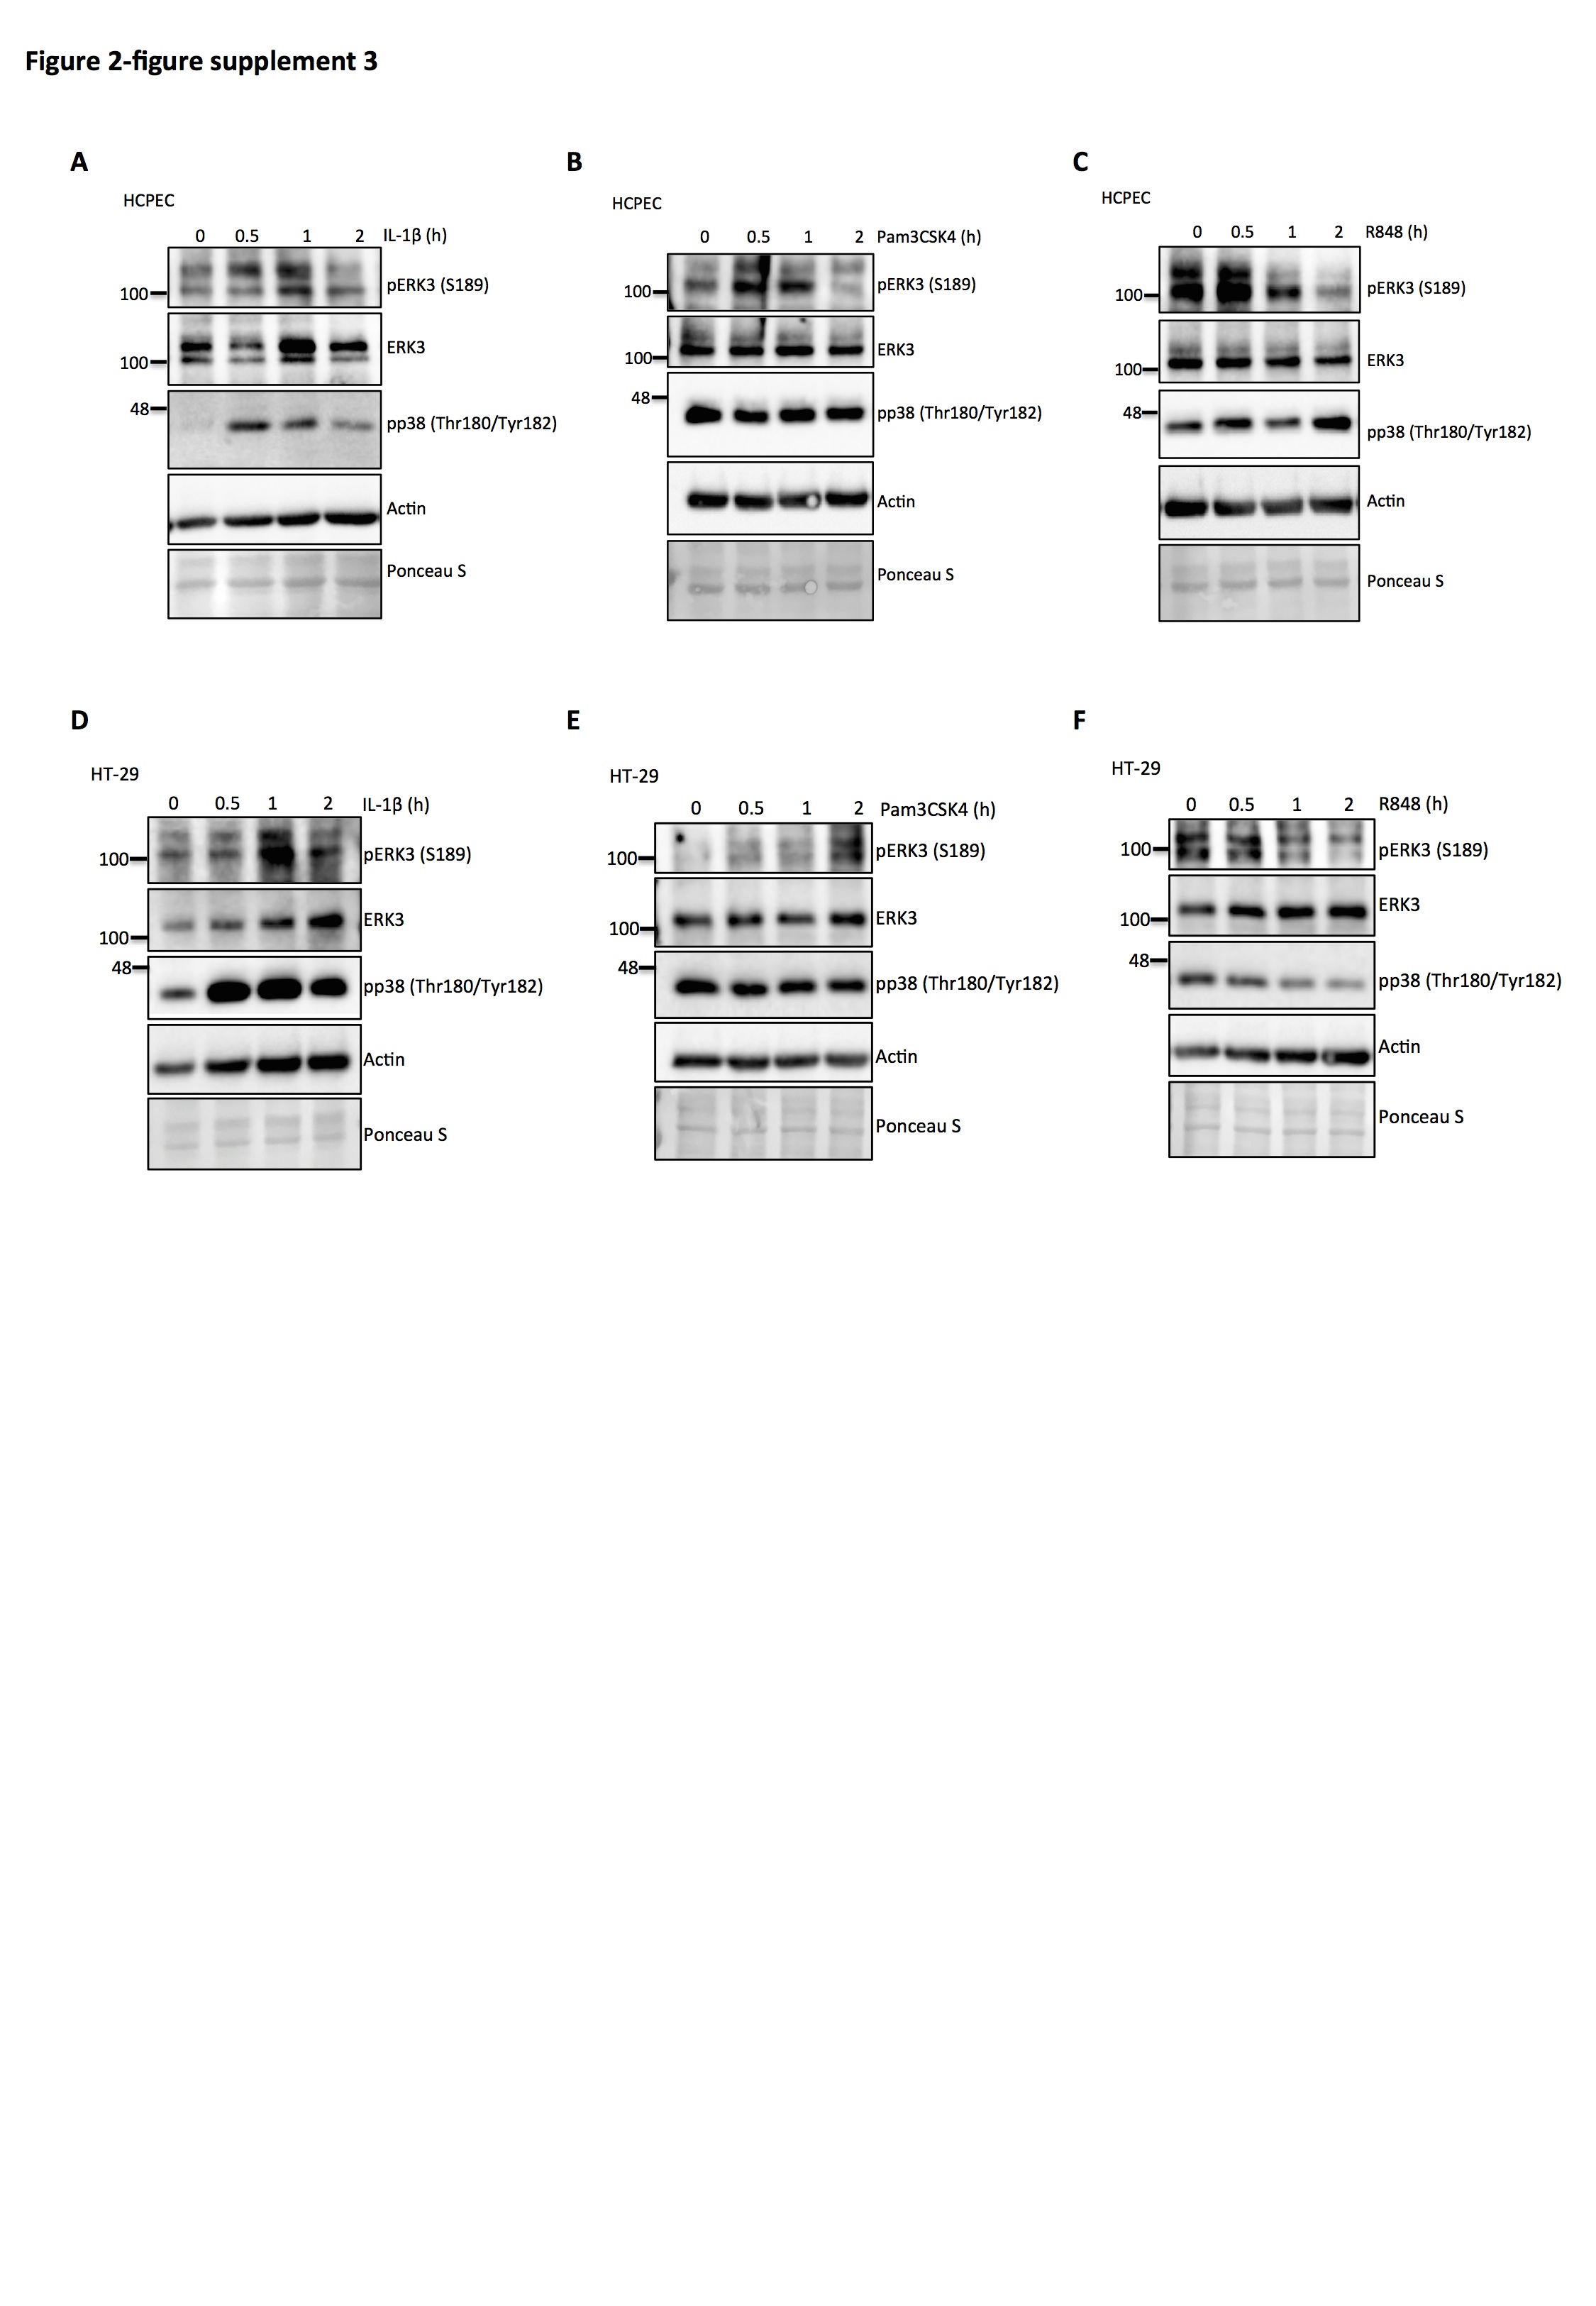

Supplement: supp [file elife-52511-supp-v1.zip › elife_poa_e52511_Figure_2_figure_supplement_3.jpg]

Figure 1

C

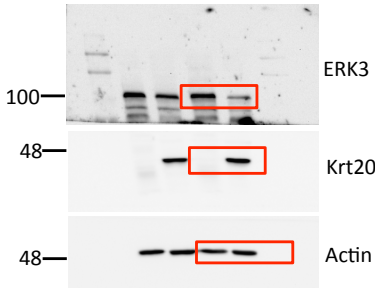

F

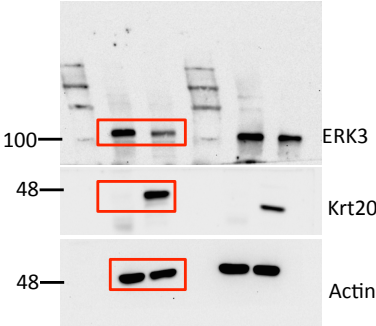

G

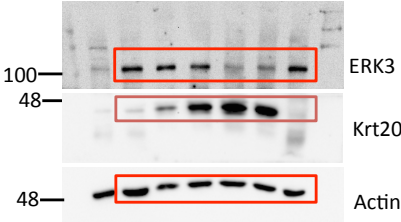

Supplement: supp [file elife-52511-supp-v1.zip › elife_poa_e52511_Figure_1_source_data_1.pdf]

Figure 4

D

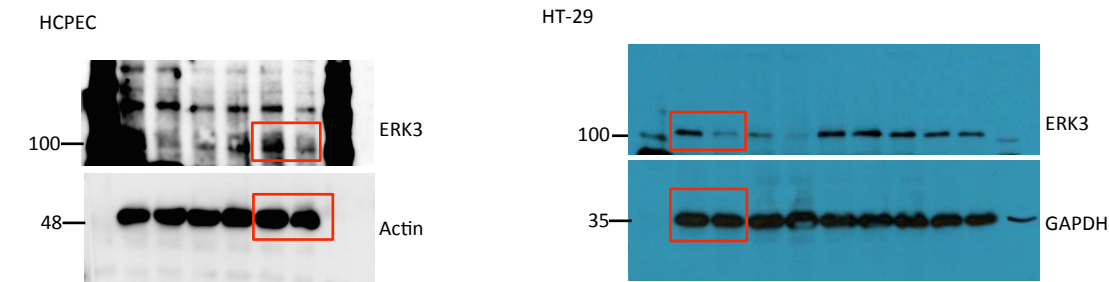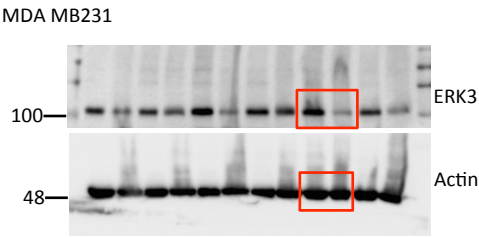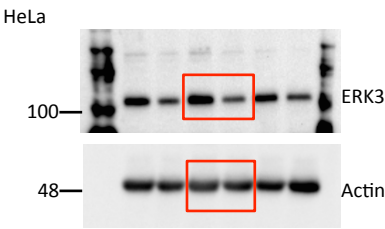

G

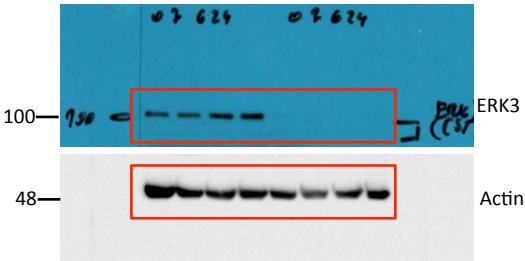

J

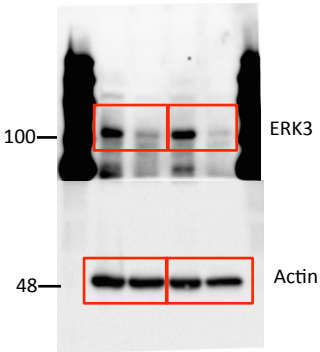

Supplement: supp [file elife-52511-supp-v1.zip › elife_poa_e52511_Figure_4_source_data_1.pdf]
